# Supplementary material for: DNMT family induces down-regulation of NDRG1 via DNA methylation and clinicopathological significance in gastric cancer
Source: PeerJ journal article supplement (doi:10.7717/peerj.12146), 2021-09-16
Supplement: raw_data-WB.zip [file WB-raw data.xlsx]

## Sheet: Sheet1
GES1（grey level)	SGC7901	MNK45
119136	133515	221436	DNMT3B
77106	448890	289208	DNMT3A				GES1	SGC7901	MKN45
47103	395387	298684	DNMT1			NDRG1-relative expression	0.65	0.61	0.34
167807	136300	87397	NDRG1			DNMT1	0.18	1.76	1.17
256579	224356	255272	GAPDH			DNMT3A	0.3	2	1.13
						DNMT3B	0.46	0.595	0.87
