# Supplementary material for: DNMT family induces down-regulation of NDRG1 via DNA methylation and clinicopathological significance in gastric cancer
Source: PeerJ journal article supplement (doi:10.7717/peerj.12146), 2021-09-16
Supplement: Raw_data.zip [file clinical data.xlsx]

## Sheet: 表达量合并临床信息-5-25
Ensembl_ID	sex	sex-TJ	age	age-TJ	T	T-TJ	N	N-TJ	M	M-TJ	stage	stage-TJ	grade	grade-TJ	EVENT	OS	DNMT1	DNMT3A	DNMT3B	NDRG1
TCGA-HU-8244	FEMALE	0	77		T1a	1	N0	0	M0	0	Stage IA	1	G1	1	Alive	742	3.56048	1.16193	1.45173	5.54728
TCGA-KB-A93G	MALE	1	68		T2	2	N0	0	M0	0	Stage IB	1	G1	1	Alive	613	3.3005	2.02105	0.969997	5.42035
TCGA-CD-5800	FEMALE	0	51		T3	3	N0	0	M0	0	Stage II	2	G1	1	Alive	400	4.02807	2.71005	3.65553	5.66709
TCGA-KB-A93H	FEMALE	0	79		T3	3	N1	1	M0	0	Stage IIB	2	G1	1	Alive	1145	3.00974	2.0517	1.92541	2.74962
TCGA-VQ-A927	MALE	1	81		T3	3	N3	3	M0	0	Stage IIIB	3	G1	1	Dead	200	3.0029	1.43506	0.774735	4.8318
TCGA-VQ-A91A	MALE	1	67		T3	3	N3a	3	M0	0	Stage IIIB	3	G1	1	Alive	1200	3.62462	2.13477	1.6151	5.61906
TCGA-CG-5719	FEMALE	0	54		T4	4	N0	0	M1	1	Stage IV	4	G1	1	Alive	31	3.097	1.81627	1.07652	4.59731
TCGA-IN-A6RI	MALE	1	45		T1b	1	N0	0	M0	0	Stage I	1	G2	2	Alive	559	2.87895	1.62637	2.3894	4.74936
TCGA-CG-5726	MALE	1	73		T1	1	N0	0	M0	0	Stage IA	1	G2	2	Dead	881	3.82085	1.07654	1.5202	6.24902
TCGA-VQ-A8PX	MALE	1	51		T1	1	N0	0	M0	0	Stage IA	1	G2	2	Alive	1964	3.28906	1.51449	1.11251	5.19007
TCGA-CG-4443	MALE	1	68		T1	1	N0	0	M0	0	Stage IA	1	G2	2	Alive	912	2.53601	1.89967	1.06574	3.85871
TCGA-HU-A4G9	FEMALE	0	67		T1a	1	N0	0	M0	0	Stage IA	1	G2	2	Alive	736	3.38344	1.05909	1.06181	6.1145
TCGA-IN-A6RS	MALE	1	76		T1b	1	N0	0	M0	0	Stage IA	1	G2	2	Alive	383	2.82893	1.35532	1.67002	4.51726
TCGA-HU-A4GH	MALE	1	75		T1b	1	N0	0	M0	0	Stage IA	1	G2	2	Alive	358	3.31478	1.35084	1.32226	4.45857
TCGA-BR-8486	FEMALE	0	90		T1b	1	N0	0	M0	0	Stage IA	1	G2	2	Alive	0	3.43602	2.15749	0.992435	4.64974
TCGA-IN-AB1V	MALE	1	63		T1b	1	N0	0	M0	0	Stage IA	1	G2	2	Alive	479	2.54573	1.75234	0.898902	6.51103
TCGA-HU-8610	MALE	1	75		T1b	1	N0	0	M0	0	Stage IA	1	G2	2	Alive	23	3.58546	2.34993	2.90652	5.03094
TCGA-F1-6875	MALE	1	79		T2	2	N0	0	M0	0	Stage IA	1	G2	2	Dead	2197	3.86643	2.39208	2.30495	3.33531
TCGA-BR-8679	FEMALE	0	63		T2	2	N0	0	M0	0	Stage IB	1	G2	2	Alive	0	3.80755	2.05775	1.96066	4.28406
TCGA-D7-8578	MALE	1	72		T2	2	N0	0	M0	0	Stage IB	1	G2	2	Alive	643	2.90481	2.44785	1.19923	5.28344
TCGA-D7-6822	MALE	1	77		T2	2	N0	0	M0	0	Stage IB	1	G2	2	Alive	375	4.10222	2.40927	2.75713	4.36685
TCGA-VQ-A8DV	MALE	1	48		T2	2	N0	0	M0	0	Stage IB	1	G2	2	Dead	403	2.64593	2.3183	3.17618	4.21535
TCGA-CG-4436	MALE	1	57		T2	2	N0	0	M0	0	Stage IB	1	G2	2	Alive	243	3.47667	1.36842	1.27142	3.45277
TCGA-BR-8678	MALE	1	76		T2	2	N0	0	M0	0	Stage IB	1	G2	2	Alive	754	4.71241	3.29089	3.06295	5.83264
TCGA-D7-6528	FEMALE	0	70		T2	2	N0	0	M0	0	Stage IB	1	G2	2	Alive	463	4.25539	1.45885	1.01171	5.87375
TCGA-BR-6710	MALE	1	41		T2	2	N0	0	M0	0	Stage IB	1	G2	2	Alive	273	1.77037	1.56929	0.312768	5.69972
TCGA-CG-4466	FEMALE	0	81		T2a	2	N0	0	M0	0	Stage IB	1	G2	2	Alive	577	3.58485	2.07871	2.10781	6.03946
TCGA-BR-4267	MALE	1	51		T2a	2	N0	0	M0	0	Stage IB	1	G2	2	Dead	188	3.26562	1.47404	0.828604	4.86501
TCGA-VQ-A92D	MALE	1	67		T2b	2	N0	0	M0	0	Stage IB	1	G2	2	Alive	2032	3.67002	1.99763	1.56146	4.59272
TCGA-HU-A4H8	MALE	1	77		T1b	1	N1	1	M0	0	Stage IB	1	G2	2	Alive	270	3.91915	0.766666	1.35631	5.8478
TCGA-VQ-A8PB	FEMALE	0	65		T3	3	N0	0	M0	0	Stage II	2	G2	2	Dead	1043	3.80887	0.558464	0.97203	6.34063
TCGA-CD-8532	MALE	1	52		T3	3	N0	0	M0	0	Stage II	2	G2	2	Dead	354	3.76998	1.96236	0.773846	5.50739
TCGA-VQ-A924	MALE	1	69		T3	3	N0	0	M0	0	Stage II	2	G2	2	Dead	1686	4.15913	0.913321	1.65709	4.2157
TCGA-CD-5798	MALE	1	82		T3	3	N0	0	M0	0	Stage II	2	G2	2	Alive	408	2.40775	1.63135	0.609369	4.31598
TCGA-CG-4437	MALE	1	83		T2	2	N1	1	M0	0	Stage II	2	G2	2	Alive	245	3.69235	1.52477	0.768579	5.33283
TCGA-CD-8527	FEMALE	0	72		T2	2	N1	1	M0	0	Stage II	2	G2	2	Dead	218	3.09986	2.38169	1.72859	5.02163
TCGA-D7-6527	MALE	1	62		T2	2	N1	1	M0	0	Stage II	2	G2	2	Dead	312	2.83305	1.33628	1.60194	5.21429
TCGA-CG-5718	FEMALE	0	78		T2b	2	N1	1	M0	0	Stage II	2	G2	2	Dead	1095	3.02426	2.27244	1.46232	5.49085
TCGA-HU-A4GF	MALE	1	69		T3	3	N0	0	M0	0	Stage IIA	2	G2	2	Alive	785	3.69908	2.45496	2.08794	4.60233
TCGA-CD-A486	MALE	1	68		T3	3	N0	0	M0	0	Stage IIA	2	G2	2	Dead	192	2.71612	2.51478	3.27202	5.90434
TCGA-F1-A72C	MALE	1	68		T3	3	N0	0	M0	0	Stage IIA	2	G2	2	Alive	346	4.17738	1.55542	0.979628	4.09714
TCGA-CD-A48A	MALE	1	57		T3	3	N0	0	M0	0	Stage IIA	2	G2	2	Alive	378	3.31647	1.82097	1.69691	3.93238
TCGA-BR-7715	MALE	1	65		T3	3	N0	0	M0	0	Stage IIA	2	G2	2	Alive	1023	3.33662	2.52034	3.68105	3.38193
TCGA-VQ-AA6G	MALE	1	68		T3	3	N0	0	M0	0	Stage IIA	2	G2	2	Dead	792	3.39622	1.13228	0.531703	4.63298
TCGA-CD-A4MH	FEMALE	0	86		T3	3	N0	0	M0	0	Stage IIA	2	G2	2	Alive	371	3.06895	2.34677	2.51771	4.49429
TCGA-HU-8604	FEMALE	0	82		T3	3	N0	0	M0	0	Stage IIA	2	G2	2	Alive	694	4.50115	1.79804	0.98649	4.30709
TCGA-BR-6801	MALE	1	70		T3	3	N0	0	M0	0	Stage IIA	2	G2	2	Alive	1223	2.78097	1.67111	1.35485	5.85161
TCGA-BR-A4J6	FEMALE	0	69		T3	3	N0	0	M0	0	Stage IIA	2	G2	2	Alive	20	2.05383	1.32894	0.744181	3.7598
TCGA-HU-A4GP	FEMALE	0	62		T2	2	N1	1	M0	0	Stage IIA	2	G2	2	Alive	273	3.43604	1.26722	0.636291	5.76287
TCGA-IN-A6RN	FEMALE	0	72		T1b	1	N2	2	M0	0	Stage IIA	2	G2	2	Alive	594	2.63377	1.27467	0.854353	5.29647
TCGA-BR-8081	FEMALE	0	71		T4a	4	N0	0	M0	0	Stage IIB	2	G2	2	Alive	981	4.02319	1.10174	0.787266	4.28757
TCGA-VQ-A8P8	FEMALE	0	72		T4a	4	N0	0	M0	0	Stage IIB	2	G2	2	Alive	942	3.2597	1.36867	0.849686	5.09237
TCGA-BR-6565	MALE	1	67		T4a	4	N0	0	M0	0	Stage IIB	2	G2	2	Dead	279	4.66902	2.46938	2.22644	5.28829
TCGA-IN-8462	MALE	1	80		T2	2	N1	1	M0	0	Stage IIB	2	G2	2	Alive	572	2.60206	1.3338	1.0397	5.51212
TCGA-BR-6456	FEMALE	0	74		T3	3	N1	1	M0	0	Stage IIB	2	G2	2	Dead	526	4.33098	1.88514	1.7859	4.86003
TCGA-VQ-AA6F	MALE	1	57		T3	3	N1	1	M0	0	Stage IIB	2	G2	2	Alive	1646	3.44463	1.67139	0.636103	3.84624
TCGA-BR-7901	MALE	1	74		T3	3	N1	1	M0	0	Stage IIB	2	G2	2	Dead	105	2.97114	1.83494	1.61289	5.54156
TCGA-BR-7716	FEMALE	0	62		T3	3	N1	1	M0	0	Stage IIB	2	G2	2	Alive	1210	3.43916	2.39858	2.01625	5.70129
TCGA-FP-7829	MALE	1	69		T3	3	N1	1	M0	0	Stage IIB	2	G2	2	Alive	594	3.76697	1.66671	1.34712	5.32931
TCGA-D7-8572	MALE	1	57		T2	2	N2	2	M0	0	Stage IIB	2	G2	2	Alive	511	4.43248	2.89685	2.50992	5.20991
TCGA-D7-8579	FEMALE	0	66		T2	2	N2	2	M0	0	Stage IIB	2	G2	2	Alive	636	2.88548	2.20084	0.879068	4.92413
TCGA-D7-6815	FEMALE	0	70		T2	2	N2	2	M0	0	Stage IIB	2	G2	2	Alive	486	3.85234	1.94752	1.36068	6.30119
TCGA-HU-A4G3	MALE	1	54		T2	2	N2	2	M0	0	Stage IIB	2	G2	2	Alive	170	2.93141	1.36491	0.651522	4.41495
TCGA-BR-4280	FEMALE	0	78		T2b	2	N1	1	M0	0	Stage III	3	G2	2	Dead	201	3.65011	1.49371	0.762907	5.9719
TCGA-VQ-A91Z	FEMALE	0	67		T3	3	N1	1	M0	0	Stage IIIA	3	G2	2	Alive	1690	3.50055	2.35773	2.15959	4.70459
TCGA-VQ-A91K	MALE	1	69		T3	3	N1	1	M0	0	Stage IIIA	3	G2	2	Alive	1862	4.2906	0.874257	1.14195	4.05346
TCGA-VQ-A91U	MALE	1	78		T3	3	N1	1	M0	0	Stage IIIA	3	G2	2	Dead	52	3.10552	2.11273	1.582	5.69003
TCGA-RD-A8N5	MALE	1	78		T3	3	N1	1	M0	0	Stage IIIA	3	G2	2	Dead	1747	2.98412	1.5306	0.538512	4.71775
TCGA-VQ-A8P3	MALE	1	72		T4	4	N1	1	M0	0	Stage IIIA	3	G2	2	Alive	1132	3.68154	0.812997	1.09193	4.15742
TCGA-VQ-A8P2	MALE	1	68		T4a	4	N1	1	M0	0	Stage IIIA	3	G2	2	Alive	1160	3.6513	1.27353	2.067	5.41716
TCGA-BR-8484	MALE	1	61		T4a	4	N1	1	M0	0	Stage IIIA	3	G2	2	Dead	766	3.76074	1.82599	1.06408	5.12589
TCGA-VQ-AA6D	FEMALE	0	52		T4a	4	N1	1	M0	0	Stage IIIA	3	G2	2	Alive	521	3.63385	2.36874	2.4976	6.57447
TCGA-BR-8373	FEMALE	0	65		T4a	4	N1	1	M0	0	Stage IIIA	3	G2	2	Alive	450	3.08585	3.33487	2.32292	5.25304
TCGA-CG-4441	MALE	1	83		T2	2	N2	2	M0	0	Stage IIIA	3	G2	2	Dead	426	3.74224	1.82958	1.81976	6.55448
TCGA-HU-A4HD	MALE	1	73		T3	3	N2	2	M0	0	Stage IIIA	3	G2	2	Alive	1016	3.40154	2.76606	2.68805	6.113
TCGA-D7-A74A	FEMALE	0	61		T3	3	N2	2	M0	0	Stage IIIA	3	G2	2	Alive	607	3.17736	1.23162	1.53909	6.50511
TCGA-HU-8249	MALE	1	76		T3	3	N2	2	M0	0	Stage IIIA	3	G2	2	Alive	881	4.53264	2.80723	1.57796	3.89719
TCGA-HU-A4H6	FEMALE	0	72		T3	3	N2	2	M0	0	Stage IIIA	3	G2	2	Alive	644	3.44362	1.62643	1.43556	4.09329
TCGA-VQ-AA69	MALE	1	35		T3	3	N2	2	M0	0	Stage IIIA	3	G2	2	Alive	864	5.40738	3.10543	2.07383	3.90589
TCGA-BR-8483	MALE	1	59		T3	3	N2	2	M0	0	Stage IIIA	3	G2	2	Alive	164	3.49747	2.77429	2.8748	5.65553
TCGA-R5-A7ZE	FEMALE	0	66		T3	3	N2	2	M0	0	Stage IIIA	3	G2	2	Dead	554	2.96858	1.97535	2.09954	5.38525
TCGA-VQ-A925	MALE	1	66		T3	3	N2	2	M0	0	Stage IIIA	3	G2	2	Dead	138	3.71826	1.46338	1.56139	5.50228
TCGA-VQ-A8DU	MALE	1	63		T3	3	N2	2	M0	0	Stage IIIA	3	G2	2	Dead	166	2.89378	2.00368	3.16009	3.62576
TCGA-D7-6526	FEMALE	0	67		T3	3	N2	2	M0	0	Stage IIIA	3	G2	2	Alive	523	3.59726	1.91361	1.79059	5.26992
TCGA-VQ-A91V	MALE	1	58		T3	3	N2	2	M0	0	Stage IIIA	3	G2	2	Alive	1297	2.67295	0.850046	0.750719	5.73168
TCGA-SW-A7EB	MALE	1	45		T3	3	N2	2	M0	0	Stage IIIA	3	G2	2	Alive	176	2.75143	2.85843	3.85406	5.73366
TCGA-D7-5577	FEMALE	0	53		T2	2	N3	3	M0	0	Stage IIIA	3	G2	2	Dead	782	3.74062	1.75874	1.51026	3.67365
TCGA-BR-8077	FEMALE	0	58		T4b	4	N1	1	M0	0	Stage IIIB	3	G2	2	Alive	21	2.74071	1.53571	1.2265	4.9336
TCGA-VQ-AA64	MALE	1	68		T3	3	N2	2	M0	0	Stage IIIB	3	G2	2	Dead	560	2.93457	2.13513	1.71134	3.73364
TCGA-VQ-A8E2	MALE	1	57		T3	3	N2	2	M0	0	Stage IIIB	3	G2	2	Alive	1319	3.70042	3.3174	3.81043	4.02469
TCGA-VQ-A8PH	MALE	1	62		T3	3	N3	3	M0	0	Stage IIIB	3	G2	2	Dead	389	3.25376	2.10984	3.69746	4.30372
TCGA-BR-A4QL	FEMALE	0	75		T3	3	N3a	3	M0	0	Stage IIIB	3	G2	2	Dead	491	3.23731	1.67986	0.964273	4.35395
TCGA-VQ-A8PK	MALE	1	58		T3	3	N3a	3	M0	0	Stage IIIB	3	G2	2	Dead	543	3.56563	1.89754	1.61513	5.17547
TCGA-BR-8690	FEMALE	0	54		T3	3	N3a	3	M0	0	Stage IIIB	3	G2	2	Alive	325	3.07098	2.51992	1.9587	4.17134
TCGA-HU-A4H2	FEMALE	0	58		T3	3	N3b	3	M0	0	Stage IIIB	3	G2	2	Alive	394	2.97637	2.25553	1.72222	4.51667
TCGA-HU-A4GQ	MALE	1	71		T4b	4	N2	2	M0	0	Stage IIIC	3	G2	2	Dead	3	3.53383	1.36429	1.01513	3.41981
TCGA-VQ-A91D	MALE	1	70		T4b	4	N2	2	M0	0	Stage IIIC	3	G2	2	Dead	356	3.72235	0.41225	0.168171	5.72206
TCGA-VQ-A8PD	MALE	1	69		T4a	4	N3	3	M0	0	Stage IIIC	3	G2	2	Dead	496	3.61733	1.81308	1.36358	4.94577
TCGA-VQ-AA68	FEMALE	0	52		T4a	4	N3	3	M0	0	Stage IIIC	3	G2	2	Alive	1328	3.30582	1.89061	1.20211	4.95681
TCGA-VQ-A94O	MALE	1	74		T4a	4	N3	3	M0	0	Stage IIIC	3	G2	2	Dead	640	4.09209	3.23041	4.15479	6.25138
TCGA-VQ-AA6A	MALE	1	56		T4	4	N3a	3	M0	0	Stage IIIC	3	G2	2	Alive	1184	3.38871	2.38976	1.71891	5.07415
TCGA-BR-7717	MALE	1	63		T4	4	N1	1	M0	0	Stage IV	4	G2	2	Dead	552	2.95407	2.00979	1.7038	4.40844
TCGA-VQ-A8PP	MALE	1	76		T4	4	N1	1	M0	0	Stage IV	4	G2	2	Dead	712	3.57616	1.4843	0.934419	4.31938
TCGA-VQ-A922	MALE	1	70		T4	4	N1	1	M0	0	Stage IV	4	G2	2	Dead	275	3.76648	2.71332	2.97036	4.74337
TCGA-CG-5732	MALE	1	66		T2	2	N3	3	M0	0	Stage IV	4	G2	2	Dead	2100	2.64289	1.72131	1.02414	5.34281
TCGA-VQ-A928	MALE	1	49		T3	3	N3	3	M0	0	Stage IV	4	G2	2	Dead	174	3.70781	2.53664	2.56549	5.73904
TCGA-VQ-A91N	FEMALE	0	59		T4	4	N3	3	M0	0	Stage IV	4	G2	2	Dead	570	3.8203	1.52278	1.68332	5.01066
TCGA-CD-8529	MALE	1	65		T4	4	N0	0	M1	1	Stage IV	4	G2	2	Alive	374	3.45873	1.82794	1.24193	4.51164
TCGA-R5-A7O7	MALE	1	51		T3	3	N1	1	M1	1	Stage IV	4	G2	2	Alive	1389	3.4047	1.76987	1.65923	4.30726
TCGA-VQ-A8E7	MALE	1	59		T3	3	N1	1	M1	1	Stage IV	4	G2	2	Alive	1138	3.70149	1.99048	1.12644	5.13775
TCGA-VQ-A8PQ	FEMALE	0	50		T4	4	N1	1	M1	1	Stage IV	4	G2	2	Dead	476	3.8739	2.40606	0.758964	4.4822
TCGA-CG-4460	FEMALE	0	66		T4	4	N1	1	M1	1	Stage IV	4	G2	2	Dead	669	3.54148	2.21431	1.90198	5.54142
TCGA-R5-A7ZF	FEMALE	0	65		T4a	4	N1	1	M1	1	Stage IV	4	G2	2	Dead	259	3.87826	1.2476	1.24217	4.24449
TCGA-CG-5716	MALE	1	86		T4a	4	N2	2	M1	1	Stage IV	4	G2	2	Alive	0	3.29006	1.37865	0.67776	5.62379
TCGA-BR-8680	MALE	1	45		T4b	4	N2	2	M1	1	Stage IV	4	G2	2	Alive	972	4.08735	1.8778	2.04847	5.41165
TCGA-IN-A6RJ	MALE	1	64		T1b	1	N0	0	M0	0	Stage IA	1	G3	3	Alive	379	2.79506	1.45096	0.539098	7.0099
TCGA-RD-A8N2	FEMALE	0	59		T2	2	N0	0	M0	0	Stage IB	1	G3	3	Alive	3540	2.14953	1.74685	0.326145	3.48338
TCGA-CG-4442	MALE	1	85		T2	2	N0	0	M0	0	Stage IB	1	G3	3	Alive	0	3.61222	1.52325	1.27553	4.94793
TCGA-BR-7707	FEMALE	0	69		T2	2	N0	0	M0	0	Stage IB	1	G3	3	Alive	1090	3.93292	0.87548	0.771973	4.78232
TCGA-RD-A7BW	FEMALE	0	68		T2	2	N0	0	M0	0	Stage IB	1	G3	3	Dead	156	2.49304	1.82107	0.655453	3.9957
TCGA-CG-5720	MALE	1	71		T2	2	N0	0	M0	0	Stage IB	1	G3	3	Dead	30	3.34616	1.3015	0.612711	5.71311
TCGA-BR-8368	FEMALE	0	84		T2	2	N0	0	M0	0	Stage IB	1	G3	3	Alive	131	3.84849	1.84687	1.8105	5.11788
TCGA-D7-A6F0	FEMALE	0	79		T2	2	N0	0	M0	0	Stage IB	1	G3	3	Alive	678	3.55568	3.25938	4.82324	5.28178
TCGA-CG-5725	MALE	1	72		T2	2	N0	0	M0	0	Stage IB	1	G3	3	Dead	457	3.47695	2.85395	4.39403	6.90011
TCGA-D7-6522	MALE	1	58		T2	2	N0	0	M0	0	Stage IB	1	G3	3	Alive	566	3.30022	1.74863	0.429268	5.26166
TCGA-F1-6874	MALE	1	79		T2	2	N0	0	M0	0	Stage IB	1	G3	3	Alive	440	3.76316	1.28489	0.311205	5.15156
TCGA-B7-5818	MALE	1	62		T2	2	N0	0	M0	0	Stage IB	1	G3	3	Alive	356	3.32229	2.28054	1.04921	5.03558
TCGA-D7-A6F2	MALE	1	62		T2	2	N0	0	M0	0	Stage IB	1	G3	3	Alive	476	3.00304	2.49601	1.47783	6.45393
TCGA-RD-A7C1	MALE	1	82		T2	2	N0	0	M0	0	Stage IB	1	G3	3	Dead	507	3.40912	1.50722	1.80486	3.95902
TCGA-CG-4477	FEMALE	0	58		T2a	2	N0	0	M0	0	Stage IB	1	G3	3	Alive	942	3.95399	1.63414	1.24768	4.96148
TCGA-FP-8209	MALE	1	49		T2a	2	N0	0	M0	0	Stage IB	1	G3	3	Dead	1811	3.06011	2.49545	0.539592	4.42802
TCGA-KB-A6F7	FEMALE	0	54		T1	1	N1	1	M0	0	Stage IB	1	G3	3	Alive	1935	3.58529	3.21485	2.88103	5.66673
TCGA-CD-8533	MALE	1	48		T3	3	N0	0	M0	0	Stage II	2	G3	3	Alive	468	6.53587	3.76573	3.97738	4.55301
TCGA-CD-8524	FEMALE	0	61		T3	3	N0	0	M0	0	Stage II	2	G3	3	Alive	388	2.78482	2.05361	1.3885	4.32495
TCGA-CD-8530	MALE	1	51		T3	3	N0	0	M0	0	Stage II	2	G3	3	Alive	377	3.09555	2.04588	1.79111	4.89629
TCGA-BR-7704	FEMALE	0	69		T3	3	N0	0	M0	0	Stage II	2	G3	3	Alive	1072	3.72188	2.42644	2.61061	3.38432
TCGA-CD-8534	MALE	1	41		T3	3	N0	0	M0	0	Stage II	2	G3	3	Alive	367	3.42677	2.26588	1.21979	5.09965
TCGA-CD-5813	MALE	1	60		T3	3	N0	0	M0	0	Stage II	2	G3	3	Dead	377	3.27086	1.88577	1.26528	6.17524
TCGA-CD-5803	FEMALE	0	78		T3	3	N0	0	M0	0	Stage II	2	G3	3	Dead	341	3.66731	1.88965	0.917766	4.95689
TCGA-BR-8286	MALE	1	49		T3	3	N0	0	M0	0	Stage II	2	G3	3	Alive	895	3.82248	1.54901	1.45445	4.02773
TCGA-RD-A8N9	FEMALE	0	63		T2	2	N1	1	M0	0	Stage II	2	G3	3	Alive	1083	3.2199	1.7294	1.67245	5.45366
TCGA-D7-6524	MALE	1	53		T2	2	N1	1	M0	0	Stage II	2	G3	3	Alive	543	3.29907	1.81153	1.01083	5.58054
TCGA-CG-5723	MALE	1	83		T2	2	N1	1	M0	0	Stage II	2	G3	3	Alive	2496	3.31181	1.37817	1.13059	4.17439
TCGA-CD-5799	MALE	1	45		T2	2	N1	1	M0	0	Stage II	2	G3	3	Alive	396	3.56967	1.67005	0.813178	5.61962
TCGA-BR-4279	MALE	1	43		T2a	2	N1	1	M0	0	Stage II	2	G3	3	Dead	291	1.7716	0.780052	0.338686	5.12085
TCGA-CG-4305	MALE	1	69		T2a	2	N1	1	M0	0	Stage II	2	G3	3	Alive	485	3.31264	1.65791	1.81892	4.76885
TCGA-CG-5717	MALE	1	58		T2b	2	N1	1	M0	0	Stage II	2	G3	3	Dead	212	2.75136	1.40676	0.659772	7.14274
TCGA-KB-A93J	MALE	1	78		T2b	2	N1	1	M0	0	Stage II	2	G3	3	Alive	1124	3.99306	1.8094	1.23323	6.01631
TCGA-D7-8573	MALE	1	57		T3	3	N0	0	M0	0	Stage IIA	2	G3	3	Alive	593	4.32863	1.88406	1.90189	2.98808
TCGA-HU-A4GT	FEMALE	0	71		T3	3	N0	0	M0	0	Stage IIA	2	G3	3	Alive	198	3.48854	0.997643	0.782224	5.17917
TCGA-BR-8487	FEMALE	0	64		T3	3	N0	0	M0	0	Stage IIA	2	G3	3	Alive	34	3.10442	0.639275	0.258964	3.9006
TCGA-BR-6454	MALE	1	58		T3	3	N0	0	M0	0	Stage IIA	2	G3	3	Alive	0	3.8181	2.24975	0.852728	4.42171
TCGA-MX-A663	MALE	1	66		T3	3	N0	0	M0	0	Stage IIA	2	G3	3	Dead	300	3.47764	3.12333	3.43553	5.53591
TCGA-BR-A44T	FEMALE	0	53		T3	3	N0	0	M0	0	Stage IIA	2	G3	3	Alive	1038	2.92857	2.32004	0.651481	3.65584
TCGA-BR-6803	FEMALE	0	54		T3	3	N0	0	M0	0	Stage IIA	2	G3	3	Alive	949	2.96172	1.88962	0.84549	5.52911
TCGA-BR-6707	MALE	1	75		T3	3	N0	0	M0	0	Stage IIA	2	G3	3	Dead	605	4.02658	2.56681	1.87011	5.42111
TCGA-VQ-A8P5	MALE	1	67		T3	3	N0	0	M0	0	Stage IIA	2	G3	3	Dead	235	3.93614	1.94474	1.44515	4.19301
TCGA-BR-6852	FEMALE	0	64		T3	3	N0	0	M0	0	Stage IIA	2	G3	3	Alive	1367	3.68942	1.53306	1.32558	4.53013
TCGA-BR-A4J9	MALE	1	55		T3	3	N0	0	M0	0	Stage IIA	2	G3	3	Alive	14	2.24468	1.8966	0.337673	3.80523
TCGA-BR-6452	FEMALE	0	78		T3	3	N0	0	M0	0	Stage IIA	2	G3	3	Alive	1055	3.47096	1.79898	1.43793	7.04189
TCGA-BR-6457	MALE	1	69		T3	3	N0	0	M0	0	Stage IIA	2	G3	3	Alive	416	2.76927	1.84871	0.957685	5.81337
TCGA-BR-8366	FEMALE	0	80		T3	3	N0	0	M0	0	Stage IIA	2	G3	3	Alive	29	3.57551	1.86102	1.04585	4.14422
TCGA-BR-8365	FEMALE	0	70		T3	3	N0	0	M0	0	Stage IIA	2	G3	3	Dead	533	2.85593	2.1405	0.655814	4.83088
TCGA-IN-AB1X	FEMALE	0	78		T3	3	N0	0	M0	0	Stage IIA	2	G3	3	Alive	411	3.64329	2.24885	0.875206	5.74507
TCGA-VQ-A8E3	MALE	1	79		T3	3	N0	0	M0	0	Stage IIA	2	G3	3	Dead	661	4.53025	2.37921	1.34842	2.67337
TCGA-CD-A4MG	MALE	1	76		T3	3	N0	0	M0	0	Stage IIA	2	G3	3	Dead	200	3.32936	1.76807	0.720285	3.53265
TCGA-CD-A489	MALE	1	58		T3	3	N0	0	M0	0	Stage IIA	2	G3	3	Dead	344	2.21885	2.09493	0.647366	3.43845
TCGA-BR-6566	FEMALE	0	64		T3	3	N0	0	M0	0	Stage IIA	2	G3	3	Alive	997	3.00292	1.46923	0.425219	5.12071
TCGA-BR-6453	MALE	1	54		T2	2	N1	1	M0	0	Stage IIA	2	G3	3	Alive	485	3.12376	1.91792	0.620951	6.16001
TCGA-VQ-A8PO	MALE	1	74		T4a	4	N0	0	M0	0	Stage IIB	2	G3	3	Dead	282	4.32111	1.23709	0.362632	4.68311
TCGA-VQ-A94U	MALE	1	70		T4a	4	N0	0	M0	0	Stage IIB	2	G3	3	Alive	819	3.77366	1.97837	1.40871	4.56733
TCGA-BR-8295	FEMALE	0	60		T4a	4	N0	0	M0	0	Stage IIB	2	G3	3	Dead	67	3.50404	3.33392	4.91521	4.04419
TCGA-BR-8588	FEMALE	0	55		T4a	4	N0	0	M0	0	Stage IIB	2	G3	3	Alive	389	3.36444	1.8941	1.27689	5.01565
TCGA-BR-8682	MALE	1	52		T4a	4	N0	0	M0	0	Stage IIB	2	G3	3	Alive	991	2.74607	2.03225	0.970774	5.82304
TCGA-BR-7851	MALE	1	74		T4a	4	N0	0	M0	0	Stage IIB	2	G3	3	Dead	574	4.30674	1.71867	0.890353	6.24358
TCGA-HU-8602	FEMALE	0	58		T4a	4	N0	0	M0	0	Stage IIB	2	G3	3	Alive	679	4.58179	0.681591	1.11847	4.6238
TCGA-CG-4475	MALE	1	76		T3	3	N1	1	M0	0	Stage IIB	2	G3	3	Alive	699	2.88243	1.6431	1.34096	5.22366
TCGA-HU-A4GD	MALE	1	56		T3	3	N1	1	M0	0	Stage IIB	2	G3	3	Alive	692	3.61247	2.21229	2.69491	4.3649
TCGA-D7-A747	MALE	1	57		T3	3	N1	1	M0	0	Stage IIB	2	G3	3	Dead	255	2.27746	2.03773	0.611694	3.78637
TCGA-BR-7722	MALE	1	62		T3	3	N1	1	M0	0	Stage IIB	2	G3	3	Dead	466	2.73491	1.73762	1.13116	4.56562
TCGA-BR-6458	FEMALE	0	57		T3	3	N1	1	M0	0	Stage IIB	2	G3	3	Dead	588	3.66204	2.22976	1.59644	4.44791
TCGA-BR-8381	MALE	1	51		T3	3	N1	1	M0	0	Stage IIB	2	G3	3	Alive	224	3.83346	2.48816	1.31558	4.07081
TCGA-D7-A4YX	MALE	1	63		T3	3	N1	1	M0	0	Stage IIB	2	G3	3	Alive	1108	4.1721	2.17151	1.34383	2.95689
TCGA-HU-A4G8	FEMALE	0	71		T3	3	N1	1	M0	0	Stage IIB	2	G3	3	Alive	690	3.94546	2.07696	1.19697	4.81319
TCGA-IN-7806	MALE	1	50		T3	3	N1	1	M0	0	Stage IIB	2	G3	3	Alive	1106	3.51995	2.34389	0.962366	5.63881
TCGA-IN-A7NT	FEMALE	0	73		T3	3	N1	1	M0	0	Stage IIB	2	G3	3	Alive	323	3.30493	2.40196	4.23183	5.53404
TCGA-HU-A4G2	MALE	1	45		T3	3	N1	1	M0	0	Stage IIB	2	G3	3	Alive	739	3.38837	1.26509	0.884439	4.2561
TCGA-BR-6563	MALE	1	60		T3	3	N1	1	M0	0	Stage IIB	2	G3	3	Alive	1190	2.48474	1.62198	0.365809	4.73947
TCGA-CD-A487	MALE	1	51		T3	3	N1	1	M0	0	Stage IIB	2	G3	3	Alive	374	3.00015	1.58324	2.43327	4.15899
TCGA-BR-6455	MALE	1	59		T3	3	N1	1	M0	0	Stage IIB	2	G3	3	Dead	422	3.96408	2.51369	3.02639	4.04184
TCGA-HU-A4GU	MALE	1	73		T3	3	N1	1	M0	0	Stage IIB	2	G3	3	Alive	200	3.58839	1.76708	1.75801	5.44868
TCGA-CD-A48C	FEMALE	0	79		T3	3	N1	1	M0	0	Stage IIB	2	G3	3	Dead	353	3.10847	1.94264	1.27473	4.54821
TCGA-HU-A4HB	MALE	1	68		T2	2	N2	2	M0	0	Stage IIB	2	G3	3	Dead	477	3.78754	1.58979	1.47924	5.24111
TCGA-BR-8060	FEMALE	0	75		T2	2	N2	2	M0	0	Stage IIB	2	G3	3	Dead	348	3.55606	2.2649	2.28739	4.97784
TCGA-HU-A4H4	FEMALE	0	53		T2	2	N2	2	M0	0	Stage IIB	2	G3	3	Alive	725	3.87474	1.71428	1.57755	3.57384
TCGA-D7-A4Z0	FEMALE	0	60		T2	2	N2	2	M0	0	Stage IIB	2	G3	3	Alive	449	2.95293	1.54275	0.563175	4.83975
TCGA-D7-A6EV	FEMALE	0	71		T2	2	N2	2	M0	0	Stage IIB	2	G3	3	Alive	342	3.9239	1.47097	2.0291	6.23657
TCGA-IN-8663	MALE	1	68		T2	2	N2	2	M0	0	Stage IIB	2	G3	3	Dead	103	3.93494	2.15588	1.19815	5.54093
TCGA-BR-8059	MALE	1	72		T4	4	N1	1	M0	0	Stage III	3	G3	3	Dead	439	2.76033	1.57335	1.04103	4.77236
TCGA-CD-8528	FEMALE	0	43		T4	4	N0	0	M0	0	Stage IIIA	3	G3	3	Alive	375	4.14719	1.30507	0.555002	3.82565
TCGA-BR-4361	FEMALE	0	66		T4	4	N0	0	M0	0	Stage IIIA	3	G3	3	Alive	0	3.78041	1.39634	0.89058	5.24395
TCGA-CD-5801	MALE	1	69		T3	3	N1	1	M0	0	Stage IIIA	3	G3	3	Dead	401	3.60831	1.18132	0.926836	2.84606
TCGA-VQ-A8PC	MALE	1	65		T3	3	N1	1	M0	0	Stage IIIA	3	G3	3	Dead	1407	3.52058	1.90597	1.5063	4.61749
TCGA-CD-8526	FEMALE	0	73		T3	3	N1	1	M0	0	Stage IIIA	3	G3	3	Alive	381	4.18963	3.05928	4.25499	5.13535
TCGA-RD-A8NB	FEMALE	0	80		T3	3	N1	1	M0	0	Stage IIIA	3	G3	3	Dead	513	3.80695	1.81814	1.07727	4.49883
TCGA-CD-8531	FEMALE	0	66		T3	3	N1	1	M0	0	Stage IIIA	3	G3	3	Alive	383	5.49587	1.7389	0.664835	3.47675
TCGA-CD-8525	FEMALE	0	82		T3	3	N1	1	M0	0	Stage IIIA	3	G3	3	Alive	383	3.44491	2.02308	2.78472	3.92453
TCGA-RD-A7BS	MALE	1	46		T3	3	N1	1	M0	0	Stage IIIA	3	G3	3	Dead	336	2.79399	1.49972	0.959495	6.15076
TCGA-FP-8210	MALE	1	48		T3	3	N1	1	M0	0	Stage IIIA	3	G3	3	Dead	153	3.32141	2.2626	0.902985	4.79444
TCGA-CD-8535	MALE	1	59		T3	3	N1	1	M0	0	Stage IIIA	3	G3	3	Alive	390	3.59692	2.44764	2.73569	3.78196
TCGA-CG-5734	MALE	1	68		T3	3	N1	1	M0	0	Stage IIIA	3	G3	3	Dead	243	2.70717	1.05904	0.448668	5.41855
TCGA-BR-4253	FEMALE	0	80		T3	3	N1	1	M0	0	Stage IIIA	3	G3	3	Dead	124	4.60198	2.08428	1.36347	3.35339
TCGA-MX-A5UG	MALE	1	78		T3	3	N1	1	M0	0	Stage IIIA	3	G3	3	Dead	113	3.40067	2.3198	0.894713	4.87643
TCGA-RD-A8N4	FEMALE	0	58		T3	3	N1	1	M0	0	Stage IIIA	3	G3	3	Alive	2171	2.27231	2.13637	0.505534	3.88724
TCGA-VQ-A923	MALE	1	90		T3	3	N1	1	M0	0	Stage IIIA	3	G3	3	Dead	0	3.93384	2.34057	1.71183	4.0201
TCGA-HU-A4GY	FEMALE	0	76		T4	4	N1	1	M0	0	Stage IIIA	3	G3	3	Alive	8	3.75038	2.23633	0.801659	4.45944
TCGA-BR-7959	MALE	1	59		T4a	4	N1	1	M0	0	Stage IIIA	3	G3	3	Alive	1010	3.47548	2.02527	1.6114	4.32673
TCGA-VQ-A8PU	FEMALE	0	72		T4a	4	N1	1	M0	0	Stage IIIA	3	G3	3	Dead	832	2.97976	1.01064	1.1588	5.07698
TCGA-BR-A4J5	MALE	1	56		T4a	4	N1	1	M0	0	Stage IIIA	3	G3	3	Alive	862	2.91995	1.78146	0.777045	4.48521
TCGA-D7-6525	MALE	1	58		T2	2	N2	2	M0	0	Stage IIIA	3	G3	3	Dead	406	2.76733	2.17152	1.2376	4.51936
TCGA-RD-A8N6	FEMALE	0	78		T2	2	N2	2	M0	0	Stage IIIA	3	G3	3	Dead	272	2.80012	2.67172	2.55441	5.61411
TCGA-CG-4444	MALE	1	76		T2b	2	N2	2	M0	0	Stage IIIA	3	G3	3	Alive	1431	3.429	1.96845	0.899475	4.91203
TCGA-D7-6520	MALE	1	53		T2b	2	N2	2	M0	0	Stage IIIA	3	G3	3	Alive	573	2.91137	2.18773	3.833	5.56654
TCGA-D7-8575	MALE	1	75		T3	3	N2	2	M0	0	Stage IIIA	3	G3	3	Dead	554	3.06731	2.27551	0.785352	4.91974
TCGA-VQ-A8E0	MALE	1	68		T3	3	N2	2	M0	0	Stage IIIA	3	G3	3	Dead	562	3.27405	1.63926	1.26312	4.68178
TCGA-D7-A6EX	FEMALE	0	72		T3	3	N2	2	M0	0	Stage IIIA	3	G3	3	Alive	344	3.2756	2.6575	0.764885	3.7481
TCGA-BR-6564	FEMALE	0	46		T3	3	N2	2	M0	0	Stage IIIA	3	G3	3	Dead	794	2.46376	1.92716	0.463581	5.03431
TCGA-D7-A6EZ	MALE	1	66		T3	3	N2	2	M0	0	Stage IIIA	3	G3	3	Alive	297	4.30482	2.0922	1.48555	3.05403
TCGA-FP-A4BF	MALE	1	68		T3	3	N2	2	M0	0	Stage IIIA	3	G3	3	Dead	168	3.52059	1.50244	1.30339	4.50951
TCGA-BR-6802	MALE	1	65		T3	3	N2	2	M0	0	Stage IIIA	3	G3	3	Alive	940	3.62996	1.67909	1.09811	3.81769
TCGA-MX-A5UJ	FEMALE	0	86		T3	3	N2	2	M0	0	Stage IIIA	3	G3	3	Alive	600	3.45562	1.37344	1.48691	5.07879
TCGA-D7-5578	MALE	1	80		T3	3	N2	2	M0	0	Stage IIIA	3	G3	3	Alive	385	4.24726	1.81423	1.25981	6.51984
TCGA-D7-6818	MALE	1	53		T2	2	N3	3	M0	0	Stage IIIA	3	G3	3	Alive	321	3.86922	2.14498	1.00176	4.41967
TCGA-D7-8574	MALE	1	72		T2	2	N3a	3	M0	0	Stage IIIA	3	G3	3	Alive	523	3.21873	2.47618	0.79467	4.41825
TCGA-VQ-A91E	FEMALE	0	67		T4b	4	N0	0	M0	0	Stage IIIB	3	G3	3	Alive	664	3.87527	1.54747	1.49188	6.77952
TCGA-BR-7958	MALE	1	60		T4b	4	N0	0	M0	0	Stage IIIB	3	G3	3	Alive	899	4.37259	1.97858	1.5246	4.20389
TCGA-BR-8592	FEMALE	0	63		T4b	4	N1	1	M0	0	Stage IIIB	3	G3	3	Dead	191	2.93001	2.34532	0.786288	4.62713
TCGA-BR-8686	MALE	1	69		T4b	4	N1	1	M0	0	Stage IIIB	3	G3	3	Dead	635	3.88972	2.57722	1.73072	4.36354
TCGA-BR-8589	MALE	1	56		T4b	4	N1	1	M0	0	Stage IIIB	3	G3	3	Alive	825	4.23078	2.06734	1.69273	3.30298
TCGA-RD-A8MV	MALE	1	56		T3	3	N2	2	M0	0	Stage IIIB	3	G3	3	Alive	3720	3.40013	1.85879	1.32778	4.22017
TCGA-RD-A8MW	MALE	1	72		T3	3	N2	2	M0	0	Stage IIIB	3	G3	3	Dead	1153	3.16801	2.16899	1.57387	6.16109
TCGA-VQ-A94T	MALE	1	73		T3	3	N2	2	M0	0	Stage IIIB	3	G3	3	Dead	342	3.88032	2.14462	1.52565	2.194
TCGA-RD-A8N0	FEMALE	0	53		T3	3	N2	2	M0	0	Stage IIIB	3	G3	3	Alive	1236	3.11195	1.81169	0.794907	4.56325
TCGA-RD-A8N1	MALE	1	70		T3	3	N2	2	M0	0	Stage IIIB	3	G3	3	Alive	3519	3.71092	2.17718	1.56635	5.24741
TCGA-VQ-A91X	MALE	1	74		T3	3	N2	2	M0	0	Stage IIIB	3	G3	3	Dead	289	2.93101	1.71754	2.42861	5.31938
TCGA-R5-A805	MALE	1	71		T3	3	N2	2	M0	0	Stage IIIB	3	G3	3	Dead	281	3.69826	1.66541	0.750215	5.39303
TCGA-BR-A4IV	MALE	1	47		T4a	4	N2	2	M0	0	Stage IIIB	3	G3	3	Dead	869	2.4903	2.11444	0.69489	3.92129
TCGA-BR-8683	MALE	1	75		T4a	4	N2	2	M0	0	Stage IIIB	3	G3	3	Dead	300	3.4121	2.33243	1.13213	4.54854
TCGA-BR-A4J4	MALE	1	39		T4a	4	N2	2	M0	0	Stage IIIB	3	G3	3	Alive	16	3.4259	1.21114	1.73813	4.98917
TCGA-HU-A4GC	MALE	1	74		T4a	4	N2	2	M0	0	Stage IIIB	3	G3	3	Alive	99	3.25709	1.75315	1.73221	5.31029
TCGA-BR-A4PF	MALE	1	72		T4a	4	N2	2	M0	0	Stage IIIB	3	G3	3	Alive	35	3.74721	2.1721	0.833846	3.43645
TCGA-VQ-AA6J	MALE	1	75		T4a	4	N2	2	M0	0	Stage IIIB	3	G3	3	Alive	838	3.73845	2.50403	2.07697	4.05851
TCGA-BR-8058	FEMALE	0	53		T4a	4	N2	2	M0	0	Stage IIIB	3	G3	3	Alive	1133	3.99923	1.63123	0.619397	5.52538
TCGA-HU-8608	MALE	1	70		T4a	4	N2	2	M0	0	Stage IIIB	3	G3	3	Alive	641	4.76633	2.42531	1.51451	3.20028
TCGA-IN-A7NU	MALE	1	69		T3	3	N3	3	M0	0	Stage IIIB	3	G3	3	Alive	356	2.61864	1.37154	0.405855	4.3163
TCGA-D7-8570	MALE	1	44		T3	3	N3a	3	M0	0	Stage IIIB	3	G3	3	Alive	752	3.71982	2.20727	1.46296	4.37432
TCGA-BR-8371	MALE	1	62		T3	3	N3a	3	M0	0	Stage IIIB	3	G3	3	Dead	359	2.47083	2.07609	0.49714	4.32583
TCGA-D7-A4YU	MALE	1	73		T3	3	N3a	3	M0	0	Stage IIIB	3	G3	3	Alive	500	4.4735	1.96988	0.671171	4.45719
TCGA-BR-6705	FEMALE	0	68		T3	3	N3a	3	M0	0	Stage IIIB	3	G3	3	Dead	779	3.51066	2.48161	1.94719	4.92015
TCGA-BR-A4J8	FEMALE	0	71		T3	3	N3a	3	M0	0	Stage IIIB	3	G3	3	Alive	411	3.14421	1.13451	0.241913	4.11336
TCGA-BR-8677	FEMALE	0	74		T3	3	N3a	3	M0	0	Stage IIIB	3	G3	3	Alive	813	3.78249	2.13274	1.14516	4.02583
TCGA-BR-8369	FEMALE	0	76		T3	3	N3a	3	M0	0	Stage IIIB	3	G3	3	Alive	427	3.37791	1.85923	1.78105	4.49405
TCGA-BR-7723	MALE	1	59		T3	3	N3a	3	M0	0	Stage IIIB	3	G3	3	Dead	874	3.59857	3.0961	4.25553	3.90653
TCGA-VQ-A8DT	MALE	1	43		T3	3	N3a	3	M0	0	Stage IIIB	3	G3	3	Alive	1484	2.74898	1.22104	1.10386	5.95718
TCGA-D7-A6EY	FEMALE	0	72		T3	3	N3a	3	M0	0	Stage IIIB	3	G3	3	Dead	348	3.89648	1.76945	1.20587	4.56971
TCGA-BR-8676	MALE	1	59		T3	3	N3a	3	M0	0	Stage IIIB	3	G3	3	Alive	229	3.29389	2.65215	1.72438	2.84328
TCGA-BR-8367	MALE	1	55		T3	3	N3a	3	M0	0	Stage IIIB	3	G3	3	Dead	801	3.34862	1.91729	1.09744	5.88079
TCGA-BR-6709	FEMALE	0	57		T3	3	N3a	3	M0	0	Stage IIIB	3	G3	3	Dead	370	4.32468	1.80524	0.635031	4.85829
TCGA-BR-A44U	MALE	1	70		T3	3	N3a	3	M0	0	Stage IIIB	3	G3	3	Dead	422	2.66917	1.00057	1.02909	5.31593
TCGA-D7-8576	FEMALE	0	54		T3	3	N3a	3	M0	0	Stage IIIB	3	G3	3	Dead	446	4.12804	1.42862	2.21133	4.91428
TCGA-VQ-A8PE	MALE	1	78		T3	3	N3a	3	M0	0	Stage IIIB	3	G3	3	Dead	675	3.87753	3.19095	4.07037	5.01034
TCGA-F1-A448	MALE	1	70		T3	3	N3b	3	M0	0	Stage IIIB	3	G3	3	Alive	647	3.0782	1.50921	0.810186	5.71145
TCGA-VQ-A8PF	MALE	1	76		T3	3	N3b	3	M0	0	Stage IIIB	3	G3	3	Dead	76	4.47187	2.24994	1.47377	4.01868
TCGA-BR-8296	FEMALE	0	58		T4b	4	N2	2	M0	0	Stage IIIC	3	G3	3	Dead	474	3.47674	1.43002	1.35377	5.31404
TCGA-HU-A4GX	FEMALE	0	70		T4b	4	N2	2	M0	0	Stage IIIC	3	G3	3	Alive	616	3.51483	1.53474	1.13237	4.75115
TCGA-BR-8687	FEMALE	0	67		T4b	4	N2	2	M0	0	Stage IIIC	3	G3	3	Dead	250	2.54877	1.87841	0.587891	5.31579
TCGA-BR-8590	MALE	1	62		T4b	4	N2	2	M0	0	Stage IIIC	3	G3	3	Dead	284	3.5262	1.93134	2.07048	4.50761
TCGA-BR-8364	FEMALE	0	42		T4b	4	N2	2	M0	0	Stage IIIC	3	G3	3	Alive	675	2.98481	2.14864	0.756479	4.81061
TCGA-BR-8384	MALE	1	69		T4b	4	N2	2	M0	0	Stage IIIC	3	G3	3	Alive	113	2.78549	2.31279	0.823831	4.94651
TCGA-BR-8361	FEMALE	0	71		T4b	4	N2	2	M0	0	Stage IIIC	3	G3	3	Alive	946	3.63289	1.02222	0.688764	4.21746
TCGA-B7-A5TI	MALE	1	52		T4	4	N3	3	M0	0	Stage IIIC	3	G3	3	Alive	595	2.95111	2.40815	0.730577	5.84237
TCGA-BR-8080	FEMALE	0	72		T4	4	N3a	3	M0	0	Stage IIIC	3	G3	3	Dead	292	4.13251	2.04822	1.07082	5.25772
TCGA-BR-8485	FEMALE	0	68		T4	4	N3a	3	M0	0	Stage IIIC	3	G3	3	Alive	280	3.38308	3.38047	4.11163	5.19105
TCGA-HU-A4GJ	FEMALE	0	60		T4	4	N3a	3	M0	0	Stage IIIC	3	G3	3	Alive	650	4.47315	1.86542	0.833675	4.50853
TCGA-BR-8284	FEMALE	0	72		T4a	4	N3a	3	M0	0	Stage IIIC	3	G3	3	Dead	245	3.90413	1.8636	0.369379	5.72959
TCGA-BR-8380	MALE	1	55		T4a	4	N3a	3	M0	0	Stage IIIC	3	G3	3	Alive	21	3.03928	2.03579	0.960771	4.63784
TCGA-BR-8591	MALE	1	79		T4a	4	N3a	3	M0	0	Stage IIIC	3	G3	3	Alive	856	4.1958	0.778113	1.1265	5.49236
TCGA-HF-A5NB	FEMALE	0	75		T4a	4	N3a	3	M0	0	Stage IIIC	3	G3	3	Alive	928	3.90464	1.74873	1.05746	6.84822
TCGA-VQ-AA6K	MALE	1	59		T4a	4	N3a	3	M0	0	Stage IIIC	3	G3	3	Dead	378	3.18987	2.32536	1.48488	3.67545
TCGA-BR-A4CR	FEMALE	0	70		T4b	4	N3a	3	M0	0	Stage IIIC	3	G3	3	Alive	0	5.55486	2.16749	2.76592	4.14537
TCGA-BR-8372	MALE	1	63		T4b	4	N3a	3	M0	0	Stage IIIC	3	G3	3	Alive	951	3.29476	1.11379	0.487297	4.49887
TCGA-BR-8382	FEMALE	0	67		T4b	4	N3a	3	M0	0	Stage IIIC	3	G3	3	Dead	762	3.26208	1.58833	0.544811	4.19011
TCGA-BR-A4CS	MALE	1	77		T4b	4	N3a	3	M0	0	Stage IIIC	3	G3	3	Dead	45	2.72569	2.57103	2.4953	3.56528
TCGA-CG-4476	MALE	1	69		T4b	4	N3a	3	M0	0	Stage IIIC	3	G3	3	Alive	0	3.05914	1.86501	0.648915	4.99395
TCGA-VQ-A91Y	MALE	1	67		T4a	4	N3b	3	M0	0	Stage IIIC	3	G3	3	Dead	296	3.04258	2.2033	2.04805	4.34827
TCGA-HU-A4H0	MALE	1	72		T4a	4	N3b	3	M0	0	Stage IIIC	3	G3	3	Alive	64	4.37131	2.25365	1.96866	2.9697
TCGA-HU-A4H3	FEMALE	0	56		T4a	4	N3b	3	M0	0	Stage IIIC	3	G3	3	Alive	882	3.15807	1.56492	1.13121	7.26585
TCGA-CG-5721	MALE	1	58		T4	4	N1	1	M0	0	Stage IV	4	G3	3	Alive	183	4.01747	1.2544	0.349932	4.19752
TCGA-CG-4438	MALE	1	56		T4	4	N2	2	M0	0	Stage IV	4	G3	3	Alive	1645	3.43632	2.0546	2.34121	6.52722
TCGA-BR-4368	FEMALE	0	78		T4	4	N2	2	M0	0	Stage IV	4	G3	3	Alive	0	3.46401	1.07817	0.574202	4.03658
TCGA-CG-4469	MALE	1	70		T3	3	N3	3	M0	0	Stage IV	4	G3	3	Dead	215	3.56378	1.85117	1.54034	4.89462
TCGA-RD-A7BT	MALE	1	66		T3	3	N3	3	M0	0	Stage IV	4	G3	3	Dead	262	3.25634	1.95156	2.35706	3.78865
TCGA-VQ-A91Q	MALE	1	61		T3	3	N3	3	M0	0	Stage IV	4	G3	3	Dead	633	3.51726	2.35589	1.17433	5.04164
TCGA-VQ-A8PM	MALE	1	56		T4	4	N3	3	M0	0	Stage IV	4	G3	3	Dead	57	3.06363	2.03911	1.37906	4.71338
TCGA-R5-A7ZI	FEMALE	0	44		T4	4	N1	1	M1	1	Stage IV	4	G3	3	Alive	2267	3.10434	1.77758	0.861563	2.79775
TCGA-CG-4301	FEMALE	0	75		T4	4	N1	1	M1	1	Stage IV	4	G3	3	Alive	92	2.8149	1.72199	0.98089	4.79792
TCGA-CG-4306	MALE	1	90		T3	3	N2	2	M1	1	Stage IV	4	G3	3	Dead	1	3.62176	1.11312	0.93166	4.86083
TCGA-CG-5722	FEMALE	0	67		T3	3	N2	2	M1	1	Stage IV	4	G3	3	Alive	30	4.07234	2.28562	1.05538	4.50963
TCGA-IN-A7NR	FEMALE	0	64		T3	3	N3	3	M1	1	Stage IV	4	G3	3	Alive	198	2.79722	1.82341	1.08187	5.91464
TCGA-CG-4440	FEMALE	0	68		T3	3	N3	3	M1	1	Stage IV	4	G3	3	Dead	122	3.35294	1.38109	0.829516	6.12642
TCGA-CG-4462	FEMALE	0	72		T3	3	N3	3	M1	1	Stage IV	4	G3	3	Dead	0	2.95271	1.82602	0.826257	5.25813
TCGA-CG-5724	MALE	1	59		T3	3	N3	3	M1	1	Stage IV	4	G3	3	Dead	366	3.64086	1.40585	1.13492	4.85778
TCGA-VQ-A8DZ	MALE	1	70		T4	4	N3	3	M1	1	Stage IV	4	G3	3	Dead	396	3.16186	2.29631	2.42799	5.87567
TCGA-CG-4465	FEMALE	0	69		T4	4	N3	3	M1	1	Stage IV	4	G3	3	Dead	274	3.47345	1.33344	0.500061	4.52816
TCGA-D7-A748	FEMALE	0	41		T4a	4	N3	3	M1	1	Stage IV	4	G3	3	Dead	132	2.44324	1.31356	0.683361	4.50625

## Sheet: NDMT1
Ensembl_ID	sex	sex-TJ	age	age-TJ	T	T-TJ	N	N-TJ	M	M-TJ	stage	stage-TJ	grade	grade-TJ	EVENT	OS	DNMT1	DNMT1
TCGA-HU-8244	FEMALE	0	77	1	T1a	1	N0	0	M0	0	Stage IA	1	G1	1	Alive	742	3.56048	1		3.45562
TCGA-KB-A93G	MALE	1	68	1	T2	2	N0	0	M0	0	Stage IB	1	G1	1	Alive	613	3.3005	0
TCGA-CD-5800	FEMALE	0	51	0	T3	3	N0	0	M0	0	Stage II	2	G1	1	Alive	400	4.02807	1
TCGA-KB-A93H	FEMALE	0	79	1	T3	3	N1	1	M0	0	Stage IIB	2	G1	1	Alive	1145	3.00974	0
TCGA-VQ-A927	MALE	1	81	1	T3	3	N3	3	M0	0	Stage IIIB	3	G1	1	Dead	200	3.0029	0
TCGA-VQ-A91A	MALE	1	67	1	T3	3	N3a	3	M0	0	Stage IIIB	3	G1	1	Alive	1200	3.62462	1
TCGA-CG-5719	FEMALE	0	54	0	T4	4	N0	0	M1	1	Stage IV	4	G1	1	Alive	31	3.097	0
TCGA-IN-A6RI	MALE	1	45	0	T1b	1	N0	0	M0	0	Stage I	1	G2	2	Alive	559	2.87895	0
TCGA-CG-5726	MALE	1	73	1	T1	1	N0	0	M0	0	Stage IA	1	G2	2	Dead	881	3.82085	1
TCGA-VQ-A8PX	MALE	1	51	0	T1	1	N0	0	M0	0	Stage IA	1	G2	2	Alive	1964	3.28906	0
TCGA-CG-4443	MALE	1	68	1	T1	1	N0	0	M0	0	Stage IA	1	G2	2	Alive	912	2.53601	0
TCGA-HU-A4G9	FEMALE	0	67	1	T1a	1	N0	0	M0	0	Stage IA	1	G2	2	Alive	736	3.38344	0
TCGA-IN-A6RS	MALE	1	76	1	T1b	1	N0	0	M0	0	Stage IA	1	G2	2	Alive	383	2.82893	0
TCGA-HU-A4GH	MALE	1	75	1	T1b	1	N0	0	M0	0	Stage IA	1	G2	2	Alive	358	3.31478	0
TCGA-BR-8486	FEMALE	0	90	1	T1b	1	N0	0	M0	0	Stage IA	1	G2	2	Alive	0	3.43602	0
TCGA-IN-AB1V	MALE	1	63	1	T1b	1	N0	0	M0	0	Stage IA	1	G2	2	Alive	479	2.54573	0
TCGA-HU-8610	MALE	1	75	1	T1b	1	N0	0	M0	0	Stage IA	1	G2	2	Alive	23	3.58546	1
TCGA-F1-6875	MALE	1	79	1	T2	2	N0	0	M0	0	Stage IA	1	G2	2	Dead	2197	3.86643	1
TCGA-BR-8679	FEMALE	0	63	1	T2	2	N0	0	M0	0	Stage IB	1	G2	2	Alive	0	3.80755	1
TCGA-D7-8578	MALE	1	72	1	T2	2	N0	0	M0	0	Stage IB	1	G2	2	Alive	643	2.90481	0
TCGA-D7-6822	MALE	1	77	1	T2	2	N0	0	M0	0	Stage IB	1	G2	2	Alive	375	4.10222	1
TCGA-VQ-A8DV	MALE	1	48	0	T2	2	N0	0	M0	0	Stage IB	1	G2	2	Dead	403	2.64593	0
TCGA-CG-4436	MALE	1	57	0	T2	2	N0	0	M0	0	Stage IB	1	G2	2	Alive	243	3.47667	1
TCGA-BR-8678	MALE	1	76	1	T2	2	N0	0	M0	0	Stage IB	1	G2	2	Alive	754	4.71241	1
TCGA-D7-6528	FEMALE	0	70	1	T2	2	N0	0	M0	0	Stage IB	1	G2	2	Alive	463	4.25539	1
TCGA-BR-6710	MALE	1	41	0	T2	2	N0	0	M0	0	Stage IB	1	G2	2	Alive	273	1.77037	0
TCGA-CG-4466	FEMALE	0	81	1	T2a	2	N0	0	M0	0	Stage IB	1	G2	2	Alive	577	3.58485	1
TCGA-BR-4267	MALE	1	51	0	T2a	2	N0	0	M0	0	Stage IB	1	G2	2	Dead	188	3.26562	0
TCGA-VQ-A92D	MALE	1	67	1	T2b	2	N0	0	M0	0	Stage IB	1	G2	2	Alive	2032	3.67002	1
TCGA-HU-A4H8	MALE	1	77	1	T1b	1	N1	1	M0	0	Stage IB	1	G2	2	Alive	270	3.91915	1
TCGA-VQ-A8PB	FEMALE	0	65	1	T3	3	N0	0	M0	0	Stage II	2	G2	2	Dead	1043	3.80887	1
TCGA-CD-8532	MALE	1	52	0	T3	3	N0	0	M0	0	Stage II	2	G2	2	Dead	354	3.76998	1
TCGA-VQ-A924	MALE	1	69	1	T3	3	N0	0	M0	0	Stage II	2	G2	2	Dead	1686	4.15913	1
TCGA-CD-5798	MALE	1	82	1	T3	3	N0	0	M0	0	Stage II	2	G2	2	Alive	408	2.40775	0
TCGA-CG-4437	MALE	1	83	1	T2	2	N1	1	M0	0	Stage II	2	G2	2	Alive	245	3.69235	1
TCGA-CD-8527	FEMALE	0	72	1	T2	2	N1	1	M0	0	Stage II	2	G2	2	Dead	218	3.09986	0
TCGA-D7-6527	MALE	1	62	1	T2	2	N1	1	M0	0	Stage II	2	G2	2	Dead	312	2.83305	0
TCGA-CG-5718	FEMALE	0	78	1	T2b	2	N1	1	M0	0	Stage II	2	G2	2	Dead	1095	3.02426	0
TCGA-HU-A4GF	MALE	1	69	1	T3	3	N0	0	M0	0	Stage IIA	2	G2	2	Alive	785	3.69908	1
TCGA-CD-A486	MALE	1	68	1	T3	3	N0	0	M0	0	Stage IIA	2	G2	2	Dead	192	2.71612	0
TCGA-F1-A72C	MALE	1	68	1	T3	3	N0	0	M0	0	Stage IIA	2	G2	2	Alive	346	4.17738	1
TCGA-CD-A48A	MALE	1	57	0	T3	3	N0	0	M0	0	Stage IIA	2	G2	2	Alive	378	3.31647	0
TCGA-BR-7715	MALE	1	65	1	T3	3	N0	0	M0	0	Stage IIA	2	G2	2	Alive	1023	3.33662	0
TCGA-VQ-AA6G	MALE	1	68	1	T3	3	N0	0	M0	0	Stage IIA	2	G2	2	Dead	792	3.39622	0
TCGA-CD-A4MH	FEMALE	0	86	1	T3	3	N0	0	M0	0	Stage IIA	2	G2	2	Alive	371	3.06895	0
TCGA-HU-8604	FEMALE	0	82	1	T3	3	N0	0	M0	0	Stage IIA	2	G2	2	Alive	694	4.50115	1
TCGA-BR-6801	MALE	1	70	1	T3	3	N0	0	M0	0	Stage IIA	2	G2	2	Alive	1223	2.78097	0
TCGA-BR-A4J6	FEMALE	0	69	1	T3	3	N0	0	M0	0	Stage IIA	2	G2	2	Alive	20	2.05383	0
TCGA-HU-A4GP	FEMALE	0	62	1	T2	2	N1	1	M0	0	Stage IIA	2	G2	2	Alive	273	3.43604	0
TCGA-IN-A6RN	FEMALE	0	72	1	T1b	1	N2	2	M0	0	Stage IIA	2	G2	2	Alive	594	2.63377	0
TCGA-BR-8081	FEMALE	0	71	1	T4a	4	N0	0	M0	0	Stage IIB	2	G2	2	Alive	981	4.02319	1
TCGA-VQ-A8P8	FEMALE	0	72	1	T4a	4	N0	0	M0	0	Stage IIB	2	G2	2	Alive	942	3.2597	0
TCGA-BR-6565	MALE	1	67	1	T4a	4	N0	0	M0	0	Stage IIB	2	G2	2	Dead	279	4.66902	1
TCGA-IN-8462	MALE	1	80	1	T2	2	N1	1	M0	0	Stage IIB	2	G2	2	Alive	572	2.60206	0
TCGA-BR-6456	FEMALE	0	74	1	T3	3	N1	1	M0	0	Stage IIB	2	G2	2	Dead	526	4.33098	1
TCGA-VQ-AA6F	MALE	1	57	0	T3	3	N1	1	M0	0	Stage IIB	2	G2	2	Alive	1646	3.44463	0
TCGA-BR-7901	MALE	1	74	1	T3	3	N1	1	M0	0	Stage IIB	2	G2	2	Dead	105	2.97114	0
TCGA-BR-7716	FEMALE	0	62	1	T3	3	N1	1	M0	0	Stage IIB	2	G2	2	Alive	1210	3.43916	0
TCGA-FP-7829	MALE	1	69	1	T3	3	N1	1	M0	0	Stage IIB	2	G2	2	Alive	594	3.76697	1
TCGA-D7-8572	MALE	1	57	0	T2	2	N2	2	M0	0	Stage IIB	2	G2	2	Alive	511	4.43248	1
TCGA-D7-8579	FEMALE	0	66	1	T2	2	N2	2	M0	0	Stage IIB	2	G2	2	Alive	636	2.88548	0
TCGA-D7-6815	FEMALE	0	70	1	T2	2	N2	2	M0	0	Stage IIB	2	G2	2	Alive	486	3.85234	1
TCGA-HU-A4G3	MALE	1	54	0	T2	2	N2	2	M0	0	Stage IIB	2	G2	2	Alive	170	2.93141	0
TCGA-BR-4280	FEMALE	0	78	1	T2b	2	N1	1	M0	0	Stage III	3	G2	2	Dead	201	3.65011	1
TCGA-VQ-A91Z	FEMALE	0	67	1	T3	3	N1	1	M0	0	Stage IIIA	3	G2	2	Alive	1690	3.50055	1
TCGA-VQ-A91K	MALE	1	69	1	T3	3	N1	1	M0	0	Stage IIIA	3	G2	2	Alive	1862	4.2906	1
TCGA-VQ-A91U	MALE	1	78	1	T3	3	N1	1	M0	0	Stage IIIA	3	G2	2	Dead	52	3.10552	0
TCGA-RD-A8N5	MALE	1	78	1	T3	3	N1	1	M0	0	Stage IIIA	3	G2	2	Dead	1747	2.98412	0
TCGA-VQ-A8P3	MALE	1	72	1	T4	4	N1	1	M0	0	Stage IIIA	3	G2	2	Alive	1132	3.68154	1
TCGA-VQ-A8P2	MALE	1	68	1	T4a	4	N1	1	M0	0	Stage IIIA	3	G2	2	Alive	1160	3.6513	1
TCGA-BR-8484	MALE	1	61	1	T4a	4	N1	1	M0	0	Stage IIIA	3	G2	2	Dead	766	3.76074	1
TCGA-VQ-AA6D	FEMALE	0	52	0	T4a	4	N1	1	M0	0	Stage IIIA	3	G2	2	Alive	521	3.63385	1
TCGA-BR-8373	FEMALE	0	65	1	T4a	4	N1	1	M0	0	Stage IIIA	3	G2	2	Alive	450	3.08585	0
TCGA-CG-4441	MALE	1	83	1	T2	2	N2	2	M0	0	Stage IIIA	3	G2	2	Dead	426	3.74224	1
TCGA-HU-A4HD	MALE	1	73	1	T3	3	N2	2	M0	0	Stage IIIA	3	G2	2	Alive	1016	3.40154	0
TCGA-D7-A74A	FEMALE	0	61	1	T3	3	N2	2	M0	0	Stage IIIA	3	G2	2	Alive	607	3.17736	0
TCGA-HU-8249	MALE	1	76	1	T3	3	N2	2	M0	0	Stage IIIA	3	G2	2	Alive	881	4.53264	1
TCGA-HU-A4H6	FEMALE	0	72	1	T3	3	N2	2	M0	0	Stage IIIA	3	G2	2	Alive	644	3.44362	0
TCGA-VQ-AA69	MALE	1	35	0	T3	3	N2	2	M0	0	Stage IIIA	3	G2	2	Alive	864	5.40738	1
TCGA-BR-8483	MALE	1	59	0	T3	3	N2	2	M0	0	Stage IIIA	3	G2	2	Alive	164	3.49747	1
TCGA-R5-A7ZE	FEMALE	0	66	1	T3	3	N2	2	M0	0	Stage IIIA	3	G2	2	Dead	554	2.96858	0
TCGA-VQ-A925	MALE	1	66	1	T3	3	N2	2	M0	0	Stage IIIA	3	G2	2	Dead	138	3.71826	1
TCGA-VQ-A8DU	MALE	1	63	1	T3	3	N2	2	M0	0	Stage IIIA	3	G2	2	Dead	166	2.89378	0
TCGA-D7-6526	FEMALE	0	67	1	T3	3	N2	2	M0	0	Stage IIIA	3	G2	2	Alive	523	3.59726	1
TCGA-VQ-A91V	MALE	1	58	0	T3	3	N2	2	M0	0	Stage IIIA	3	G2	2	Alive	1297	2.67295	0
TCGA-SW-A7EB	MALE	1	45	0	T3	3	N2	2	M0	0	Stage IIIA	3	G2	2	Alive	176	2.75143	0
TCGA-D7-5577	FEMALE	0	53	0	T2	2	N3	3	M0	0	Stage IIIA	3	G2	2	Dead	782	3.74062	1
TCGA-BR-8077	FEMALE	0	58	0	T4b	4	N1	1	M0	0	Stage IIIB	3	G2	2	Alive	21	2.74071	0
TCGA-VQ-AA64	MALE	1	68	1	T3	3	N2	2	M0	0	Stage IIIB	3	G2	2	Dead	560	2.93457	0
TCGA-VQ-A8E2	MALE	1	57	0	T3	3	N2	2	M0	0	Stage IIIB	3	G2	2	Alive	1319	3.70042	1
TCGA-VQ-A8PH	MALE	1	62	1	T3	3	N3	3	M0	0	Stage IIIB	3	G2	2	Dead	389	3.25376	0
TCGA-BR-A4QL	FEMALE	0	75	1	T3	3	N3a	3	M0	0	Stage IIIB	3	G2	2	Dead	491	3.23731	0
TCGA-VQ-A8PK	MALE	1	58	0	T3	3	N3a	3	M0	0	Stage IIIB	3	G2	2	Dead	543	3.56563	1
TCGA-BR-8690	FEMALE	0	54	0	T3	3	N3a	3	M0	0	Stage IIIB	3	G2	2	Alive	325	3.07098	0
TCGA-HU-A4H2	FEMALE	0	58	0	T3	3	N3b	3	M0	0	Stage IIIB	3	G2	2	Alive	394	2.97637	0
TCGA-HU-A4GQ	MALE	1	71	1	T4b	4	N2	2	M0	0	Stage IIIC	3	G2	2	Dead	3	3.53383	1
TCGA-VQ-A91D	MALE	1	70	1	T4b	4	N2	2	M0	0	Stage IIIC	3	G2	2	Dead	356	3.72235	1
TCGA-VQ-A8PD	MALE	1	69	1	T4a	4	N3	3	M0	0	Stage IIIC	3	G2	2	Dead	496	3.61733	1
TCGA-VQ-AA68	FEMALE	0	52	0	T4a	4	N3	3	M0	0	Stage IIIC	3	G2	2	Alive	1328	3.30582	0
TCGA-VQ-A94O	MALE	1	74	1	T4a	4	N3	3	M0	0	Stage IIIC	3	G2	2	Dead	640	4.09209	1
TCGA-VQ-AA6A	MALE	1	56	0	T4	4	N3a	3	M0	0	Stage IIIC	3	G2	2	Alive	1184	3.38871	0
TCGA-BR-7717	MALE	1	63	1	T4	4	N1	1	M0	0	Stage IV	4	G2	2	Dead	552	2.95407	0
TCGA-VQ-A8PP	MALE	1	76	1	T4	4	N1	1	M0	0	Stage IV	4	G2	2	Dead	712	3.57616	1
TCGA-VQ-A922	MALE	1	70	1	T4	4	N1	1	M0	0	Stage IV	4	G2	2	Dead	275	3.76648	1
TCGA-CG-5732	MALE	1	66	1	T2	2	N3	3	M0	0	Stage IV	4	G2	2	Dead	2100	2.64289	0
TCGA-VQ-A928	MALE	1	49	0	T3	3	N3	3	M0	0	Stage IV	4	G2	2	Dead	174	3.70781	1
TCGA-VQ-A91N	FEMALE	0	59	0	T4	4	N3	3	M0	0	Stage IV	4	G2	2	Dead	570	3.8203	1
TCGA-CD-8529	MALE	1	65	1	T4	4	N0	0	M1	1	Stage IV	4	G2	2	Alive	374	3.45873	1
TCGA-R5-A7O7	MALE	1	51	0	T3	3	N1	1	M1	1	Stage IV	4	G2	2	Alive	1389	3.4047	0
TCGA-VQ-A8E7	MALE	1	59	0	T3	3	N1	1	M1	1	Stage IV	4	G2	2	Alive	1138	3.70149	1
TCGA-VQ-A8PQ	FEMALE	0	50	0	T4	4	N1	1	M1	1	Stage IV	4	G2	2	Dead	476	3.8739	1
TCGA-CG-4460	FEMALE	0	66	1	T4	4	N1	1	M1	1	Stage IV	4	G2	2	Dead	669	3.54148	1
TCGA-R5-A7ZF	FEMALE	0	65	1	T4a	4	N1	1	M1	1	Stage IV	4	G2	2	Dead	259	3.87826	1
TCGA-CG-5716	MALE	1	86	1	T4a	4	N2	2	M1	1	Stage IV	4	G2	2	Alive	0	3.29006	0
TCGA-BR-8680	MALE	1	45	0	T4b	4	N2	2	M1	1	Stage IV	4	G2	2	Alive	972	4.08735	1
TCGA-IN-A6RJ	MALE	1	64	1	T1b	1	N0	0	M0	0	Stage IA	1	G3	3	Alive	379	2.79506	0
TCGA-RD-A8N2	FEMALE	0	59	0	T2	2	N0	0	M0	0	Stage IB	1	G3	3	Alive	3540	2.14953	0
TCGA-CG-4442	MALE	1	85	1	T2	2	N0	0	M0	0	Stage IB	1	G3	3	Alive	0	3.61222	1
TCGA-BR-7707	FEMALE	0	69	1	T2	2	N0	0	M0	0	Stage IB	1	G3	3	Alive	1090	3.93292	1
TCGA-RD-A7BW	FEMALE	0	68	1	T2	2	N0	0	M0	0	Stage IB	1	G3	3	Dead	156	2.49304	0
TCGA-CG-5720	MALE	1	71	1	T2	2	N0	0	M0	0	Stage IB	1	G3	3	Dead	30	3.34616	0
TCGA-BR-8368	FEMALE	0	84	1	T2	2	N0	0	M0	0	Stage IB	1	G3	3	Alive	131	3.84849	1
TCGA-D7-A6F0	FEMALE	0	79	1	T2	2	N0	0	M0	0	Stage IB	1	G3	3	Alive	678	3.55568	1
TCGA-CG-5725	MALE	1	72	1	T2	2	N0	0	M0	0	Stage IB	1	G3	3	Dead	457	3.47695	1
TCGA-D7-6522	MALE	1	58	0	T2	2	N0	0	M0	0	Stage IB	1	G3	3	Alive	566	3.30022	0
TCGA-F1-6874	MALE	1	79	1	T2	2	N0	0	M0	0	Stage IB	1	G3	3	Alive	440	3.76316	1
TCGA-B7-5818	MALE	1	62	1	T2	2	N0	0	M0	0	Stage IB	1	G3	3	Alive	356	3.32229	0
TCGA-D7-A6F2	MALE	1	62	1	T2	2	N0	0	M0	0	Stage IB	1	G3	3	Alive	476	3.00304	0
TCGA-RD-A7C1	MALE	1	82	1	T2	2	N0	0	M0	0	Stage IB	1	G3	3	Dead	507	3.40912	0
TCGA-CG-4477	FEMALE	0	58	0	T2a	2	N0	0	M0	0	Stage IB	1	G3	3	Alive	942	3.95399	1
TCGA-FP-8209	MALE	1	49	0	T2a	2	N0	0	M0	0	Stage IB	1	G3	3	Dead	1811	3.06011	0
TCGA-KB-A6F7	FEMALE	0	54	0	T1	1	N1	1	M0	0	Stage IB	1	G3	3	Alive	1935	3.58529	1
TCGA-CD-8533	MALE	1	48	0	T3	3	N0	0	M0	0	Stage II	2	G3	3	Alive	468	6.53587	1
TCGA-CD-8524	FEMALE	0	61	1	T3	3	N0	0	M0	0	Stage II	2	G3	3	Alive	388	2.78482	0
TCGA-CD-8530	MALE	1	51	0	T3	3	N0	0	M0	0	Stage II	2	G3	3	Alive	377	3.09555	0
TCGA-BR-7704	FEMALE	0	69	1	T3	3	N0	0	M0	0	Stage II	2	G3	3	Alive	1072	3.72188	1
TCGA-CD-8534	MALE	1	41	0	T3	3	N0	0	M0	0	Stage II	2	G3	3	Alive	367	3.42677	0
TCGA-CD-5813	MALE	1	60	1	T3	3	N0	0	M0	0	Stage II	2	G3	3	Dead	377	3.27086	0
TCGA-CD-5803	FEMALE	0	78	1	T3	3	N0	0	M0	0	Stage II	2	G3	3	Dead	341	3.66731	1
TCGA-BR-8286	MALE	1	49	0	T3	3	N0	0	M0	0	Stage II	2	G3	3	Alive	895	3.82248	1
TCGA-RD-A8N9	FEMALE	0	63	1	T2	2	N1	1	M0	0	Stage II	2	G3	3	Alive	1083	3.2199	0
TCGA-D7-6524	MALE	1	53	0	T2	2	N1	1	M0	0	Stage II	2	G3	3	Alive	543	3.29907	0
TCGA-CG-5723	MALE	1	83	1	T2	2	N1	1	M0	0	Stage II	2	G3	3	Alive	2496	3.31181	0
TCGA-CD-5799	MALE	1	45	0	T2	2	N1	1	M0	0	Stage II	2	G3	3	Alive	396	3.56967	1
TCGA-BR-4279	MALE	1	43	0	T2a	2	N1	1	M0	0	Stage II	2	G3	3	Dead	291	1.7716	0
TCGA-CG-4305	MALE	1	69	1	T2a	2	N1	1	M0	0	Stage II	2	G3	3	Alive	485	3.31264	0
TCGA-CG-5717	MALE	1	58	0	T2b	2	N1	1	M0	0	Stage II	2	G3	3	Dead	212	2.75136	0
TCGA-KB-A93J	MALE	1	78	1	T2b	2	N1	1	M0	0	Stage II	2	G3	3	Alive	1124	3.99306	1
TCGA-D7-8573	MALE	1	57	0	T3	3	N0	0	M0	0	Stage IIA	2	G3	3	Alive	593	4.32863	1
TCGA-HU-A4GT	FEMALE	0	71	1	T3	3	N0	0	M0	0	Stage IIA	2	G3	3	Alive	198	3.48854	1
TCGA-BR-8487	FEMALE	0	64	1	T3	3	N0	0	M0	0	Stage IIA	2	G3	3	Alive	34	3.10442	0
TCGA-BR-6454	MALE	1	58	0	T3	3	N0	0	M0	0	Stage IIA	2	G3	3	Alive	0	3.8181	1
TCGA-MX-A663	MALE	1	66	1	T3	3	N0	0	M0	0	Stage IIA	2	G3	3	Dead	300	3.47764	1
TCGA-BR-A44T	FEMALE	0	53	0	T3	3	N0	0	M0	0	Stage IIA	2	G3	3	Alive	1038	2.92857	0
TCGA-BR-6803	FEMALE	0	54	0	T3	3	N0	0	M0	0	Stage IIA	2	G3	3	Alive	949	2.96172	0
TCGA-BR-6707	MALE	1	75	1	T3	3	N0	0	M0	0	Stage IIA	2	G3	3	Dead	605	4.02658	1
TCGA-VQ-A8P5	MALE	1	67	1	T3	3	N0	0	M0	0	Stage IIA	2	G3	3	Dead	235	3.93614	1
TCGA-BR-6852	FEMALE	0	64	1	T3	3	N0	0	M0	0	Stage IIA	2	G3	3	Alive	1367	3.68942	1
TCGA-BR-A4J9	MALE	1	55	0	T3	3	N0	0	M0	0	Stage IIA	2	G3	3	Alive	14	2.24468	0
TCGA-BR-6452	FEMALE	0	78	1	T3	3	N0	0	M0	0	Stage IIA	2	G3	3	Alive	1055	3.47096	1
TCGA-BR-6457	MALE	1	69	1	T3	3	N0	0	M0	0	Stage IIA	2	G3	3	Alive	416	2.76927	0
TCGA-BR-8366	FEMALE	0	80	1	T3	3	N0	0	M0	0	Stage IIA	2	G3	3	Alive	29	3.57551	1
TCGA-BR-8365	FEMALE	0	70	1	T3	3	N0	0	M0	0	Stage IIA	2	G3	3	Dead	533	2.85593	0
TCGA-IN-AB1X	FEMALE	0	78	1	T3	3	N0	0	M0	0	Stage IIA	2	G3	3	Alive	411	3.64329	1
TCGA-VQ-A8E3	MALE	1	79	1	T3	3	N0	0	M0	0	Stage IIA	2	G3	3	Dead	661	4.53025	1
TCGA-CD-A4MG	MALE	1	76	1	T3	3	N0	0	M0	0	Stage IIA	2	G3	3	Dead	200	3.32936	0
TCGA-CD-A489	MALE	1	58	0	T3	3	N0	0	M0	0	Stage IIA	2	G3	3	Dead	344	2.21885	0
TCGA-BR-6566	FEMALE	0	64	1	T3	3	N0	0	M0	0	Stage IIA	2	G3	3	Alive	997	3.00292	0
TCGA-BR-6453	MALE	1	54	0	T2	2	N1	1	M0	0	Stage IIA	2	G3	3	Alive	485	3.12376	0
TCGA-VQ-A8PO	MALE	1	74	1	T4a	4	N0	0	M0	0	Stage IIB	2	G3	3	Dead	282	4.32111	1
TCGA-VQ-A94U	MALE	1	70	1	T4a	4	N0	0	M0	0	Stage IIB	2	G3	3	Alive	819	3.77366	1
TCGA-BR-8295	FEMALE	0	60	1	T4a	4	N0	0	M0	0	Stage IIB	2	G3	3	Dead	67	3.50404	1
TCGA-BR-8588	FEMALE	0	55	0	T4a	4	N0	0	M0	0	Stage IIB	2	G3	3	Alive	389	3.36444	0
TCGA-BR-8682	MALE	1	52	0	T4a	4	N0	0	M0	0	Stage IIB	2	G3	3	Alive	991	2.74607	0
TCGA-BR-7851	MALE	1	74	1	T4a	4	N0	0	M0	0	Stage IIB	2	G3	3	Dead	574	4.30674	1
TCGA-HU-8602	FEMALE	0	58	0	T4a	4	N0	0	M0	0	Stage IIB	2	G3	3	Alive	679	4.58179	1
TCGA-CG-4475	MALE	1	76	1	T3	3	N1	1	M0	0	Stage IIB	2	G3	3	Alive	699	2.88243	0
TCGA-HU-A4GD	MALE	1	56	0	T3	3	N1	1	M0	0	Stage IIB	2	G3	3	Alive	692	3.61247	1
TCGA-D7-A747	MALE	1	57	0	T3	3	N1	1	M0	0	Stage IIB	2	G3	3	Dead	255	2.27746	0
TCGA-BR-7722	MALE	1	62	1	T3	3	N1	1	M0	0	Stage IIB	2	G3	3	Dead	466	2.73491	0
TCGA-BR-6458	FEMALE	0	57	0	T3	3	N1	1	M0	0	Stage IIB	2	G3	3	Dead	588	3.66204	1
TCGA-BR-8381	MALE	1	51	0	T3	3	N1	1	M0	0	Stage IIB	2	G3	3	Alive	224	3.83346	1
TCGA-D7-A4YX	MALE	1	63	1	T3	3	N1	1	M0	0	Stage IIB	2	G3	3	Alive	1108	4.1721	1
TCGA-HU-A4G8	FEMALE	0	71	1	T3	3	N1	1	M0	0	Stage IIB	2	G3	3	Alive	690	3.94546	1
TCGA-IN-7806	MALE	1	50	0	T3	3	N1	1	M0	0	Stage IIB	2	G3	3	Alive	1106	3.51995	1
TCGA-IN-A7NT	FEMALE	0	73	1	T3	3	N1	1	M0	0	Stage IIB	2	G3	3	Alive	323	3.30493	0
TCGA-HU-A4G2	MALE	1	45	0	T3	3	N1	1	M0	0	Stage IIB	2	G3	3	Alive	739	3.38837	0
TCGA-BR-6563	MALE	1	60	1	T3	3	N1	1	M0	0	Stage IIB	2	G3	3	Alive	1190	2.48474	0
TCGA-CD-A487	MALE	1	51	0	T3	3	N1	1	M0	0	Stage IIB	2	G3	3	Alive	374	3.00015	0
TCGA-BR-6455	MALE	1	59	0	T3	3	N1	1	M0	0	Stage IIB	2	G3	3	Dead	422	3.96408	1
TCGA-HU-A4GU	MALE	1	73	1	T3	3	N1	1	M0	0	Stage IIB	2	G3	3	Alive	200	3.58839	1
TCGA-CD-A48C	FEMALE	0	79	1	T3	3	N1	1	M0	0	Stage IIB	2	G3	3	Dead	353	3.10847	0
TCGA-HU-A4HB	MALE	1	68	1	T2	2	N2	2	M0	0	Stage IIB	2	G3	3	Dead	477	3.78754	1
TCGA-BR-8060	FEMALE	0	75	1	T2	2	N2	2	M0	0	Stage IIB	2	G3	3	Dead	348	3.55606	1
TCGA-HU-A4H4	FEMALE	0	53	0	T2	2	N2	2	M0	0	Stage IIB	2	G3	3	Alive	725	3.87474	1
TCGA-D7-A4Z0	FEMALE	0	60	1	T2	2	N2	2	M0	0	Stage IIB	2	G3	3	Alive	449	2.95293	0
TCGA-D7-A6EV	FEMALE	0	71	1	T2	2	N2	2	M0	0	Stage IIB	2	G3	3	Alive	342	3.9239	1
TCGA-IN-8663	MALE	1	68	1	T2	2	N2	2	M0	0	Stage IIB	2	G3	3	Dead	103	3.93494	1
TCGA-BR-8059	MALE	1	72	1	T4	4	N1	1	M0	0	Stage III	3	G3	3	Dead	439	2.76033	0
TCGA-CD-8528	FEMALE	0	43	0	T4	4	N0	0	M0	0	Stage IIIA	3	G3	3	Alive	375	4.14719	1
TCGA-BR-4361	FEMALE	0	66	1	T4	4	N0	0	M0	0	Stage IIIA	3	G3	3	Alive	0	3.78041	1
TCGA-CD-5801	MALE	1	69	1	T3	3	N1	1	M0	0	Stage IIIA	3	G3	3	Dead	401	3.60831	1
TCGA-VQ-A8PC	MALE	1	65	1	T3	3	N1	1	M0	0	Stage IIIA	3	G3	3	Dead	1407	3.52058	1
TCGA-CD-8526	FEMALE	0	73	1	T3	3	N1	1	M0	0	Stage IIIA	3	G3	3	Alive	381	4.18963	1
TCGA-RD-A8NB	FEMALE	0	80	1	T3	3	N1	1	M0	0	Stage IIIA	3	G3	3	Dead	513	3.80695	1
TCGA-CD-8531	FEMALE	0	66	1	T3	3	N1	1	M0	0	Stage IIIA	3	G3	3	Alive	383	5.49587	1
TCGA-CD-8525	FEMALE	0	82	1	T3	3	N1	1	M0	0	Stage IIIA	3	G3	3	Alive	383	3.44491	0
TCGA-RD-A7BS	MALE	1	46	0	T3	3	N1	1	M0	0	Stage IIIA	3	G3	3	Dead	336	2.79399	0
TCGA-FP-8210	MALE	1	48	0	T3	3	N1	1	M0	0	Stage IIIA	3	G3	3	Dead	153	3.32141	0
TCGA-CD-8535	MALE	1	59	0	T3	3	N1	1	M0	0	Stage IIIA	3	G3	3	Alive	390	3.59692	1
TCGA-CG-5734	MALE	1	68	1	T3	3	N1	1	M0	0	Stage IIIA	3	G3	3	Dead	243	2.70717	0
TCGA-BR-4253	FEMALE	0	80	1	T3	3	N1	1	M0	0	Stage IIIA	3	G3	3	Dead	124	4.60198	1
TCGA-MX-A5UG	MALE	1	78	1	T3	3	N1	1	M0	0	Stage IIIA	3	G3	3	Dead	113	3.40067	0
TCGA-RD-A8N4	FEMALE	0	58	0	T3	3	N1	1	M0	0	Stage IIIA	3	G3	3	Alive	2171	2.27231	0
TCGA-VQ-A923	MALE	1	90	1	T3	3	N1	1	M0	0	Stage IIIA	3	G3	3	Dead	0	3.93384	1
TCGA-HU-A4GY	FEMALE	0	76	1	T4	4	N1	1	M0	0	Stage IIIA	3	G3	3	Alive	8	3.75038	1
TCGA-BR-7959	MALE	1	59	0	T4a	4	N1	1	M0	0	Stage IIIA	3	G3	3	Alive	1010	3.47548	1
TCGA-VQ-A8PU	FEMALE	0	72	1	T4a	4	N1	1	M0	0	Stage IIIA	3	G3	3	Dead	832	2.97976	0
TCGA-BR-A4J5	MALE	1	56	0	T4a	4	N1	1	M0	0	Stage IIIA	3	G3	3	Alive	862	2.91995	0
TCGA-D7-6525	MALE	1	58	0	T2	2	N2	2	M0	0	Stage IIIA	3	G3	3	Dead	406	2.76733	0
TCGA-RD-A8N6	FEMALE	0	78	1	T2	2	N2	2	M0	0	Stage IIIA	3	G3	3	Dead	272	2.80012	0
TCGA-CG-4444	MALE	1	76	1	T2b	2	N2	2	M0	0	Stage IIIA	3	G3	3	Alive	1431	3.429	0
TCGA-D7-6520	MALE	1	53	0	T2b	2	N2	2	M0	0	Stage IIIA	3	G3	3	Alive	573	2.91137	0
TCGA-D7-8575	MALE	1	75	1	T3	3	N2	2	M0	0	Stage IIIA	3	G3	3	Dead	554	3.06731	0
TCGA-VQ-A8E0	MALE	1	68	1	T3	3	N2	2	M0	0	Stage IIIA	3	G3	3	Dead	562	3.27405	0
TCGA-D7-A6EX	FEMALE	0	72	1	T3	3	N2	2	M0	0	Stage IIIA	3	G3	3	Alive	344	3.2756	0
TCGA-BR-6564	FEMALE	0	46	0	T3	3	N2	2	M0	0	Stage IIIA	3	G3	3	Dead	794	2.46376	0
TCGA-D7-A6EZ	MALE	1	66	1	T3	3	N2	2	M0	0	Stage IIIA	3	G3	3	Alive	297	4.30482	1
TCGA-FP-A4BF	MALE	1	68	1	T3	3	N2	2	M0	0	Stage IIIA	3	G3	3	Dead	168	3.52059	1
TCGA-BR-6802	MALE	1	65	1	T3	3	N2	2	M0	0	Stage IIIA	3	G3	3	Alive	940	3.62996	1
TCGA-MX-A5UJ	FEMALE	0	86	1	T3	3	N2	2	M0	0	Stage IIIA	3	G3	3	Alive	600	3.45562	0
TCGA-D7-5578	MALE	1	80	1	T3	3	N2	2	M0	0	Stage IIIA	3	G3	3	Alive	385	4.24726	1
TCGA-D7-6818	MALE	1	53	0	T2	2	N3	3	M0	0	Stage IIIA	3	G3	3	Alive	321	3.86922	1
TCGA-D7-8574	MALE	1	72	1	T2	2	N3a	3	M0	0	Stage IIIA	3	G3	3	Alive	523	3.21873	0
TCGA-VQ-A91E	FEMALE	0	67	1	T4b	4	N0	0	M0	0	Stage IIIB	3	G3	3	Alive	664	3.87527	1
TCGA-BR-7958	MALE	1	60	1	T4b	4	N0	0	M0	0	Stage IIIB	3	G3	3	Alive	899	4.37259	1
TCGA-BR-8592	FEMALE	0	63	1	T4b	4	N1	1	M0	0	Stage IIIB	3	G3	3	Dead	191	2.93001	0
TCGA-BR-8686	MALE	1	69	1	T4b	4	N1	1	M0	0	Stage IIIB	3	G3	3	Dead	635	3.88972	1
TCGA-BR-8589	MALE	1	56	0	T4b	4	N1	1	M0	0	Stage IIIB	3	G3	3	Alive	825	4.23078	1
TCGA-RD-A8MV	MALE	1	56	0	T3	3	N2	2	M0	0	Stage IIIB	3	G3	3	Alive	3720	3.40013	0
TCGA-RD-A8MW	MALE	1	72	1	T3	3	N2	2	M0	0	Stage IIIB	3	G3	3	Dead	1153	3.16801	0
TCGA-VQ-A94T	MALE	1	73	1	T3	3	N2	2	M0	0	Stage IIIB	3	G3	3	Dead	342	3.88032	1
TCGA-RD-A8N0	FEMALE	0	53	0	T3	3	N2	2	M0	0	Stage IIIB	3	G3	3	Alive	1236	3.11195	0
TCGA-RD-A8N1	MALE	1	70	1	T3	3	N2	2	M0	0	Stage IIIB	3	G3	3	Alive	3519	3.71092	1
TCGA-VQ-A91X	MALE	1	74	1	T3	3	N2	2	M0	0	Stage IIIB	3	G3	3	Dead	289	2.93101	0
TCGA-R5-A805	MALE	1	71	1	T3	3	N2	2	M0	0	Stage IIIB	3	G3	3	Dead	281	3.69826	1
TCGA-BR-A4IV	MALE	1	47	0	T4a	4	N2	2	M0	0	Stage IIIB	3	G3	3	Dead	869	2.4903	0
TCGA-BR-8683	MALE	1	75	1	T4a	4	N2	2	M0	0	Stage IIIB	3	G3	3	Dead	300	3.4121	0
TCGA-BR-A4J4	MALE	1	39	0	T4a	4	N2	2	M0	0	Stage IIIB	3	G3	3	Alive	16	3.4259	0
TCGA-HU-A4GC	MALE	1	74	1	T4a	4	N2	2	M0	0	Stage IIIB	3	G3	3	Alive	99	3.25709	0
TCGA-BR-A4PF	MALE	1	72	1	T4a	4	N2	2	M0	0	Stage IIIB	3	G3	3	Alive	35	3.74721	1
TCGA-VQ-AA6J	MALE	1	75	1	T4a	4	N2	2	M0	0	Stage IIIB	3	G3	3	Alive	838	3.73845	1
TCGA-BR-8058	FEMALE	0	53	0	T4a	4	N2	2	M0	0	Stage IIIB	3	G3	3	Alive	1133	3.99923	1
TCGA-HU-8608	MALE	1	70	1	T4a	4	N2	2	M0	0	Stage IIIB	3	G3	3	Alive	641	4.76633	1
TCGA-IN-A7NU	MALE	1	69	1	T3	3	N3	3	M0	0	Stage IIIB	3	G3	3	Alive	356	2.61864	0
TCGA-D7-8570	MALE	1	44	0	T3	3	N3a	3	M0	0	Stage IIIB	3	G3	3	Alive	752	3.71982	1
TCGA-BR-8371	MALE	1	62	1	T3	3	N3a	3	M0	0	Stage IIIB	3	G3	3	Dead	359	2.47083	0
TCGA-D7-A4YU	MALE	1	73	1	T3	3	N3a	3	M0	0	Stage IIIB	3	G3	3	Alive	500	4.4735	1
TCGA-BR-6705	FEMALE	0	68	1	T3	3	N3a	3	M0	0	Stage IIIB	3	G3	3	Dead	779	3.51066	1
TCGA-BR-A4J8	FEMALE	0	71	1	T3	3	N3a	3	M0	0	Stage IIIB	3	G3	3	Alive	411	3.14421	0
TCGA-BR-8677	FEMALE	0	74	1	T3	3	N3a	3	M0	0	Stage IIIB	3	G3	3	Alive	813	3.78249	1
TCGA-BR-8369	FEMALE	0	76	1	T3	3	N3a	3	M0	0	Stage IIIB	3	G3	3	Alive	427	3.37791	0
TCGA-BR-7723	MALE	1	59	0	T3	3	N3a	3	M0	0	Stage IIIB	3	G3	3	Dead	874	3.59857	1
TCGA-VQ-A8DT	MALE	1	43	0	T3	3	N3a	3	M0	0	Stage IIIB	3	G3	3	Alive	1484	2.74898	0
TCGA-D7-A6EY	FEMALE	0	72	1	T3	3	N3a	3	M0	0	Stage IIIB	3	G3	3	Dead	348	3.89648	1
TCGA-BR-8676	MALE	1	59	0	T3	3	N3a	3	M0	0	Stage IIIB	3	G3	3	Alive	229	3.29389	0
TCGA-BR-8367	MALE	1	55	0	T3	3	N3a	3	M0	0	Stage IIIB	3	G3	3	Dead	801	3.34862	0
TCGA-BR-6709	FEMALE	0	57	0	T3	3	N3a	3	M0	0	Stage IIIB	3	G3	3	Dead	370	4.32468	1
TCGA-BR-A44U	MALE	1	70	1	T3	3	N3a	3	M0	0	Stage IIIB	3	G3	3	Dead	422	2.66917	0
TCGA-D7-8576	FEMALE	0	54	0	T3	3	N3a	3	M0	0	Stage IIIB	3	G3	3	Dead	446	4.12804	1
TCGA-VQ-A8PE	MALE	1	78	1	T3	3	N3a	3	M0	0	Stage IIIB	3	G3	3	Dead	675	3.87753	1
TCGA-F1-A448	MALE	1	70	1	T3	3	N3b	3	M0	0	Stage IIIB	3	G3	3	Alive	647	3.0782	0
TCGA-VQ-A8PF	MALE	1	76	1	T3	3	N3b	3	M0	0	Stage IIIB	3	G3	3	Dead	76	4.47187	1
TCGA-BR-8296	FEMALE	0	58	0	T4b	4	N2	2	M0	0	Stage IIIC	3	G3	3	Dead	474	3.47674	1
TCGA-HU-A4GX	FEMALE	0	70	1	T4b	4	N2	2	M0	0	Stage IIIC	3	G3	3	Alive	616	3.51483	1
TCGA-BR-8687	FEMALE	0	67	1	T4b	4	N2	2	M0	0	Stage IIIC	3	G3	3	Dead	250	2.54877	0
TCGA-BR-8590	MALE	1	62	1	T4b	4	N2	2	M0	0	Stage IIIC	3	G3	3	Dead	284	3.5262	1
TCGA-BR-8364	FEMALE	0	42	0	T4b	4	N2	2	M0	0	Stage IIIC	3	G3	3	Alive	675	2.98481	0
TCGA-BR-8384	MALE	1	69	1	T4b	4	N2	2	M0	0	Stage IIIC	3	G3	3	Alive	113	2.78549	0
TCGA-BR-8361	FEMALE	0	71	1	T4b	4	N2	2	M0	0	Stage IIIC	3	G3	3	Alive	946	3.63289	1
TCGA-B7-A5TI	MALE	1	52	0	T4	4	N3	3	M0	0	Stage IIIC	3	G3	3	Alive	595	2.95111	0
TCGA-BR-8080	FEMALE	0	72	1	T4	4	N3a	3	M0	0	Stage IIIC	3	G3	3	Dead	292	4.13251	1
TCGA-BR-8485	FEMALE	0	68	1	T4	4	N3a	3	M0	0	Stage IIIC	3	G3	3	Alive	280	3.38308	0
TCGA-HU-A4GJ	FEMALE	0	60	1	T4	4	N3a	3	M0	0	Stage IIIC	3	G3	3	Alive	650	4.47315	1
TCGA-BR-8284	FEMALE	0	72	1	T4a	4	N3a	3	M0	0	Stage IIIC	3	G3	3	Dead	245	3.90413	1
TCGA-BR-8380	MALE	1	55	0	T4a	4	N3a	3	M0	0	Stage IIIC	3	G3	3	Alive	21	3.03928	0
TCGA-BR-8591	MALE	1	79	1	T4a	4	N3a	3	M0	0	Stage IIIC	3	G3	3	Alive	856	4.1958	1
TCGA-HF-A5NB	FEMALE	0	75	1	T4a	4	N3a	3	M0	0	Stage IIIC	3	G3	3	Alive	928	3.90464	1
TCGA-VQ-AA6K	MALE	1	59	0	T4a	4	N3a	3	M0	0	Stage IIIC	3	G3	3	Dead	378	3.18987	0
TCGA-BR-A4CR	FEMALE	0	70	1	T4b	4	N3a	3	M0	0	Stage IIIC	3	G3	3	Alive	0	5.55486	1
TCGA-BR-8372	MALE	1	63	1	T4b	4	N3a	3	M0	0	Stage IIIC	3	G3	3	Alive	951	3.29476	0
TCGA-BR-8382	FEMALE	0	67	1	T4b	4	N3a	3	M0	0	Stage IIIC	3	G3	3	Dead	762	3.26208	0
TCGA-BR-A4CS	MALE	1	77	1	T4b	4	N3a	3	M0	0	Stage IIIC	3	G3	3	Dead	45	2.72569	0
TCGA-CG-4476	MALE	1	69	1	T4b	4	N3a	3	M0	0	Stage IIIC	3	G3	3	Alive	0	3.05914	0
TCGA-VQ-A91Y	MALE	1	67	1	T4a	4	N3b	3	M0	0	Stage IIIC	3	G3	3	Dead	296	3.04258	0
TCGA-HU-A4H0	MALE	1	72	1	T4a	4	N3b	3	M0	0	Stage IIIC	3	G3	3	Alive	64	4.37131	1
TCGA-HU-A4H3	FEMALE	0	56	0	T4a	4	N3b	3	M0	0	Stage IIIC	3	G3	3	Alive	882	3.15807	0
TCGA-CG-5721	MALE	1	58	0	T4	4	N1	1	M0	0	Stage IV	4	G3	3	Alive	183	4.01747	1
TCGA-CG-4438	MALE	1	56	0	T4	4	N2	2	M0	0	Stage IV	4	G3	3	Alive	1645	3.43632	0
TCGA-BR-4368	FEMALE	0	78	1	T4	4	N2	2	M0	0	Stage IV	4	G3	3	Alive	0	3.46401	1
TCGA-CG-4469	MALE	1	70	1	T3	3	N3	3	M0	0	Stage IV	4	G3	3	Dead	215	3.56378	1
TCGA-RD-A7BT	MALE	1	66	1	T3	3	N3	3	M0	0	Stage IV	4	G3	3	Dead	262	3.25634	0
TCGA-VQ-A91Q	MALE	1	61	1	T3	3	N3	3	M0	0	Stage IV	4	G3	3	Dead	633	3.51726	1
TCGA-VQ-A8PM	MALE	1	56	0	T4	4	N3	3	M0	0	Stage IV	4	G3	3	Dead	57	3.06363	0
TCGA-R5-A7ZI	FEMALE	0	44	0	T4	4	N1	1	M1	1	Stage IV	4	G3	3	Alive	2267	3.10434	0
TCGA-CG-4301	FEMALE	0	75	1	T4	4	N1	1	M1	1	Stage IV	4	G3	3	Alive	92	2.8149	0
TCGA-CG-4306	MALE	1	90	1	T3	3	N2	2	M1	1	Stage IV	4	G3	3	Dead	1	3.62176	1
TCGA-CG-5722	FEMALE	0	67	1	T3	3	N2	2	M1	1	Stage IV	4	G3	3	Alive	30	4.07234	1
TCGA-IN-A7NR	FEMALE	0	64	1	T3	3	N3	3	M1	1	Stage IV	4	G3	3	Alive	198	2.79722	0
TCGA-CG-4440	FEMALE	0	68	1	T3	3	N3	3	M1	1	Stage IV	4	G3	3	Dead	122	3.35294	0
TCGA-CG-4462	FEMALE	0	72	1	T3	3	N3	3	M1	1	Stage IV	4	G3	3	Dead	0	2.95271	0
TCGA-CG-5724	MALE	1	59	0	T3	3	N3	3	M1	1	Stage IV	4	G3	3	Dead	366	3.64086	1
TCGA-VQ-A8DZ	MALE	1	70	1	T4	4	N3	3	M1	1	Stage IV	4	G3	3	Dead	396	3.16186	0
TCGA-CG-4465	FEMALE	0	69	1	T4	4	N3	3	M1	1	Stage IV	4	G3	3	Dead	274	3.47345	1
TCGA-D7-A748	FEMALE	0	41	0	T4a	4	N3	3	M1	1	Stage IV	4	G3	3	Dead	132	2.44324	0

## Sheet: DNMT3A
Ensembl_ID	sex	sex-TJ	age	age-TJ	T	T-TJ	N	N-TJ	M	M-TJ	stage	stage-TJ	grade	grade-TJ	EVENT	OS	DNMT3A	DNMT3A
TCGA-HU-8244	FEMALE	0	77	1	T1a	1	N0	0	M0	0	Stage IA	1	G1	1	Alive	742	1.16193	0	1.88406
TCGA-KB-A93G	MALE	1	68	1	T2	2	N0	0	M0	0	Stage IB	1	G1	1	Alive	613	2.02105	1
TCGA-CD-5800	FEMALE	0	51	0	T3	3	N0	0	M0	0	Stage II	2	G1	1	Alive	400	2.71005	1
TCGA-KB-A93H	FEMALE	0	79	1	T3	3	N1	1	M0	0	Stage IIB	2	G1	1	Alive	1145	2.0517	1
TCGA-VQ-A927	MALE	1	81	1	T3	3	N3	3	M0	0	Stage IIIB	3	G1	1	Dead	200	1.43506	0
TCGA-VQ-A91A	MALE	1	67	1	T3	3	N3a	3	M0	0	Stage IIIB	3	G1	1	Alive	1200	2.13477	1
TCGA-CG-5719	FEMALE	0	54	0	T4	4	N0	0	M1	1	Stage IV	4	G1	1	Alive	31	1.81627	0
TCGA-IN-A6RI	MALE	1	45	0	T1b	1	N0	0	M0	0	Stage I	1	G2	2	Alive	559	1.62637	0
TCGA-CG-5726	MALE	1	73	1	T1	1	N0	0	M0	0	Stage IA	1	G2	2	Dead	881	1.07654	0
TCGA-VQ-A8PX	MALE	1	51	0	T1	1	N0	0	M0	0	Stage IA	1	G2	2	Alive	1964	1.51449	0
TCGA-CG-4443	MALE	1	68	1	T1	1	N0	0	M0	0	Stage IA	1	G2	2	Alive	912	1.89967	1
TCGA-HU-A4G9	FEMALE	0	67	1	T1a	1	N0	0	M0	0	Stage IA	1	G2	2	Alive	736	1.05909	0
TCGA-IN-A6RS	MALE	1	76	1	T1b	1	N0	0	M0	0	Stage IA	1	G2	2	Alive	383	1.35532	0
TCGA-HU-A4GH	MALE	1	75	1	T1b	1	N0	0	M0	0	Stage IA	1	G2	2	Alive	358	1.35084	0
TCGA-BR-8486	FEMALE	0	90	1	T1b	1	N0	0	M0	0	Stage IA	1	G2	2	Alive	0	2.15749	1
TCGA-IN-AB1V	MALE	1	63	1	T1b	1	N0	0	M0	0	Stage IA	1	G2	2	Alive	479	1.75234	0
TCGA-HU-8610	MALE	1	75	1	T1b	1	N0	0	M0	0	Stage IA	1	G2	2	Alive	23	2.34993	1
TCGA-F1-6875	MALE	1	79	1	T2	2	N0	0	M0	0	Stage IA	1	G2	2	Dead	2197	2.39208	1
TCGA-BR-8679	FEMALE	0	63	1	T2	2	N0	0	M0	0	Stage IB	1	G2	2	Alive	0	2.05775	1
TCGA-D7-8578	MALE	1	72	1	T2	2	N0	0	M0	0	Stage IB	1	G2	2	Alive	643	2.44785	1
TCGA-D7-6822	MALE	1	77	1	T2	2	N0	0	M0	0	Stage IB	1	G2	2	Alive	375	2.40927	1
TCGA-VQ-A8DV	MALE	1	48	0	T2	2	N0	0	M0	0	Stage IB	1	G2	2	Dead	403	2.3183	1
TCGA-CG-4436	MALE	1	57	0	T2	2	N0	0	M0	0	Stage IB	1	G2	2	Alive	243	1.36842	0
TCGA-BR-8678	MALE	1	76	1	T2	2	N0	0	M0	0	Stage IB	1	G2	2	Alive	754	3.29089	1
TCGA-D7-6528	FEMALE	0	70	1	T2	2	N0	0	M0	0	Stage IB	1	G2	2	Alive	463	1.45885	0
TCGA-BR-6710	MALE	1	41	0	T2	2	N0	0	M0	0	Stage IB	1	G2	2	Alive	273	1.56929	0
TCGA-CG-4466	FEMALE	0	81	1	T2a	2	N0	0	M0	0	Stage IB	1	G2	2	Alive	577	2.07871	1
TCGA-BR-4267	MALE	1	51	0	T2a	2	N0	0	M0	0	Stage IB	1	G2	2	Dead	188	1.47404	0
TCGA-VQ-A92D	MALE	1	67	1	T2b	2	N0	0	M0	0	Stage IB	1	G2	2	Alive	2032	1.99763	1
TCGA-HU-A4H8	MALE	1	77	1	T1b	1	N1	1	M0	0	Stage IB	1	G2	2	Alive	270	0.766666	0
TCGA-VQ-A8PB	FEMALE	0	65	1	T3	3	N0	0	M0	0	Stage II	2	G2	2	Dead	1043	0.558464	0
TCGA-CD-8532	MALE	1	52	0	T3	3	N0	0	M0	0	Stage II	2	G2	2	Dead	354	1.96236	1
TCGA-VQ-A924	MALE	1	69	1	T3	3	N0	0	M0	0	Stage II	2	G2	2	Dead	1686	0.913321	0
TCGA-CD-5798	MALE	1	82	1	T3	3	N0	0	M0	0	Stage II	2	G2	2	Alive	408	1.63135	0
TCGA-CG-4437	MALE	1	83	1	T2	2	N1	1	M0	0	Stage II	2	G2	2	Alive	245	1.52477	0
TCGA-CD-8527	FEMALE	0	72	1	T2	2	N1	1	M0	0	Stage II	2	G2	2	Dead	218	2.38169	1
TCGA-D7-6527	MALE	1	62	1	T2	2	N1	1	M0	0	Stage II	2	G2	2	Dead	312	1.33628	0
TCGA-CG-5718	FEMALE	0	78	1	T2b	2	N1	1	M0	0	Stage II	2	G2	2	Dead	1095	2.27244	1
TCGA-HU-A4GF	MALE	1	69	1	T3	3	N0	0	M0	0	Stage IIA	2	G2	2	Alive	785	2.45496	1
TCGA-CD-A486	MALE	1	68	1	T3	3	N0	0	M0	0	Stage IIA	2	G2	2	Dead	192	2.51478	1
TCGA-F1-A72C	MALE	1	68	1	T3	3	N0	0	M0	0	Stage IIA	2	G2	2	Alive	346	1.55542	0
TCGA-CD-A48A	MALE	1	57	0	T3	3	N0	0	M0	0	Stage IIA	2	G2	2	Alive	378	1.82097	0
TCGA-BR-7715	MALE	1	65	1	T3	3	N0	0	M0	0	Stage IIA	2	G2	2	Alive	1023	2.52034	1
TCGA-VQ-AA6G	MALE	1	68	1	T3	3	N0	0	M0	0	Stage IIA	2	G2	2	Dead	792	1.13228	0
TCGA-CD-A4MH	FEMALE	0	86	1	T3	3	N0	0	M0	0	Stage IIA	2	G2	2	Alive	371	2.34677	1
TCGA-HU-8604	FEMALE	0	82	1	T3	3	N0	0	M0	0	Stage IIA	2	G2	2	Alive	694	1.79804	0
TCGA-BR-6801	MALE	1	70	1	T3	3	N0	0	M0	0	Stage IIA	2	G2	2	Alive	1223	1.67111	0
TCGA-BR-A4J6	FEMALE	0	69	1	T3	3	N0	0	M0	0	Stage IIA	2	G2	2	Alive	20	1.32894	0
TCGA-HU-A4GP	FEMALE	0	62	1	T2	2	N1	1	M0	0	Stage IIA	2	G2	2	Alive	273	1.26722	0
TCGA-IN-A6RN	FEMALE	0	72	1	T1b	1	N2	2	M0	0	Stage IIA	2	G2	2	Alive	594	1.27467	0
TCGA-BR-8081	FEMALE	0	71	1	T4a	4	N0	0	M0	0	Stage IIB	2	G2	2	Alive	981	1.10174	0
TCGA-VQ-A8P8	FEMALE	0	72	1	T4a	4	N0	0	M0	0	Stage IIB	2	G2	2	Alive	942	1.36867	0
TCGA-BR-6565	MALE	1	67	1	T4a	4	N0	0	M0	0	Stage IIB	2	G2	2	Dead	279	2.46938	1
TCGA-IN-8462	MALE	1	80	1	T2	2	N1	1	M0	0	Stage IIB	2	G2	2	Alive	572	1.3338	0
TCGA-BR-6456	FEMALE	0	74	1	T3	3	N1	1	M0	0	Stage IIB	2	G2	2	Dead	526	1.88514	1
TCGA-VQ-AA6F	MALE	1	57	0	T3	3	N1	1	M0	0	Stage IIB	2	G2	2	Alive	1646	1.67139	0
TCGA-BR-7901	MALE	1	74	1	T3	3	N1	1	M0	0	Stage IIB	2	G2	2	Dead	105	1.83494	0
TCGA-BR-7716	FEMALE	0	62	1	T3	3	N1	1	M0	0	Stage IIB	2	G2	2	Alive	1210	2.39858	1
TCGA-FP-7829	MALE	1	69	1	T3	3	N1	1	M0	0	Stage IIB	2	G2	2	Alive	594	1.66671	0
TCGA-D7-8572	MALE	1	57	0	T2	2	N2	2	M0	0	Stage IIB	2	G2	2	Alive	511	2.89685	1
TCGA-D7-8579	FEMALE	0	66	1	T2	2	N2	2	M0	0	Stage IIB	2	G2	2	Alive	636	2.20084	1
TCGA-D7-6815	FEMALE	0	70	1	T2	2	N2	2	M0	0	Stage IIB	2	G2	2	Alive	486	1.94752	1
TCGA-HU-A4G3	MALE	1	54	0	T2	2	N2	2	M0	0	Stage IIB	2	G2	2	Alive	170	1.36491	0
TCGA-BR-4280	FEMALE	0	78	1	T2b	2	N1	1	M0	0	Stage III	3	G2	2	Dead	201	1.49371	0
TCGA-VQ-A91Z	FEMALE	0	67	1	T3	3	N1	1	M0	0	Stage IIIA	3	G2	2	Alive	1690	2.35773	1
TCGA-VQ-A91K	MALE	1	69	1	T3	3	N1	1	M0	0	Stage IIIA	3	G2	2	Alive	1862	0.874257	0
TCGA-VQ-A91U	MALE	1	78	1	T3	3	N1	1	M0	0	Stage IIIA	3	G2	2	Dead	52	2.11273	1
TCGA-RD-A8N5	MALE	1	78	1	T3	3	N1	1	M0	0	Stage IIIA	3	G2	2	Dead	1747	1.5306	0
TCGA-VQ-A8P3	MALE	1	72	1	T4	4	N1	1	M0	0	Stage IIIA	3	G2	2	Alive	1132	0.812997	0
TCGA-VQ-A8P2	MALE	1	68	1	T4a	4	N1	1	M0	0	Stage IIIA	3	G2	2	Alive	1160	1.27353	0
TCGA-BR-8484	MALE	1	61	1	T4a	4	N1	1	M0	0	Stage IIIA	3	G2	2	Dead	766	1.82599	0
TCGA-VQ-AA6D	FEMALE	0	52	0	T4a	4	N1	1	M0	0	Stage IIIA	3	G2	2	Alive	521	2.36874	1
TCGA-BR-8373	FEMALE	0	65	1	T4a	4	N1	1	M0	0	Stage IIIA	3	G2	2	Alive	450	3.33487	1
TCGA-CG-4441	MALE	1	83	1	T2	2	N2	2	M0	0	Stage IIIA	3	G2	2	Dead	426	1.82958	0
TCGA-HU-A4HD	MALE	1	73	1	T3	3	N2	2	M0	0	Stage IIIA	3	G2	2	Alive	1016	2.76606	1
TCGA-D7-A74A	FEMALE	0	61	1	T3	3	N2	2	M0	0	Stage IIIA	3	G2	2	Alive	607	1.23162	0
TCGA-HU-8249	MALE	1	76	1	T3	3	N2	2	M0	0	Stage IIIA	3	G2	2	Alive	881	2.80723	1
TCGA-HU-A4H6	FEMALE	0	72	1	T3	3	N2	2	M0	0	Stage IIIA	3	G2	2	Alive	644	1.62643	0
TCGA-VQ-AA69	MALE	1	35	0	T3	3	N2	2	M0	0	Stage IIIA	3	G2	2	Alive	864	3.10543	1
TCGA-BR-8483	MALE	1	59	0	T3	3	N2	2	M0	0	Stage IIIA	3	G2	2	Alive	164	2.77429	1
TCGA-R5-A7ZE	FEMALE	0	66	1	T3	3	N2	2	M0	0	Stage IIIA	3	G2	2	Dead	554	1.97535	1
TCGA-VQ-A925	MALE	1	66	1	T3	3	N2	2	M0	0	Stage IIIA	3	G2	2	Dead	138	1.46338	0
TCGA-VQ-A8DU	MALE	1	63	1	T3	3	N2	2	M0	0	Stage IIIA	3	G2	2	Dead	166	2.00368	1
TCGA-D7-6526	FEMALE	0	67	1	T3	3	N2	2	M0	0	Stage IIIA	3	G2	2	Alive	523	1.91361	1
TCGA-VQ-A91V	MALE	1	58	0	T3	3	N2	2	M0	0	Stage IIIA	3	G2	2	Alive	1297	0.850046	0
TCGA-SW-A7EB	MALE	1	45	0	T3	3	N2	2	M0	0	Stage IIIA	3	G2	2	Alive	176	2.85843	1
TCGA-D7-5577	FEMALE	0	53	0	T2	2	N3	3	M0	0	Stage IIIA	3	G2	2	Dead	782	1.75874	0
TCGA-BR-8077	FEMALE	0	58	0	T4b	4	N1	1	M0	0	Stage IIIB	3	G2	2	Alive	21	1.53571	0
TCGA-VQ-AA64	MALE	1	68	1	T3	3	N2	2	M0	0	Stage IIIB	3	G2	2	Dead	560	2.13513	1
TCGA-VQ-A8E2	MALE	1	57	0	T3	3	N2	2	M0	0	Stage IIIB	3	G2	2	Alive	1319	3.3174	1
TCGA-VQ-A8PH	MALE	1	62	1	T3	3	N3	3	M0	0	Stage IIIB	3	G2	2	Dead	389	2.10984	1
TCGA-BR-A4QL	FEMALE	0	75	1	T3	3	N3a	3	M0	0	Stage IIIB	3	G2	2	Dead	491	1.67986	0
TCGA-VQ-A8PK	MALE	1	58	0	T3	3	N3a	3	M0	0	Stage IIIB	3	G2	2	Dead	543	1.89754	1
TCGA-BR-8690	FEMALE	0	54	0	T3	3	N3a	3	M0	0	Stage IIIB	3	G2	2	Alive	325	2.51992	1
TCGA-HU-A4H2	FEMALE	0	58	0	T3	3	N3b	3	M0	0	Stage IIIB	3	G2	2	Alive	394	2.25553	1
TCGA-HU-A4GQ	MALE	1	71	1	T4b	4	N2	2	M0	0	Stage IIIC	3	G2	2	Dead	3	1.36429	0
TCGA-VQ-A91D	MALE	1	70	1	T4b	4	N2	2	M0	0	Stage IIIC	3	G2	2	Dead	356	0.41225	0
TCGA-VQ-A8PD	MALE	1	69	1	T4a	4	N3	3	M0	0	Stage IIIC	3	G2	2	Dead	496	1.81308	0
TCGA-VQ-AA68	FEMALE	0	52	0	T4a	4	N3	3	M0	0	Stage IIIC	3	G2	2	Alive	1328	1.89061	1
TCGA-VQ-A94O	MALE	1	74	1	T4a	4	N3	3	M0	0	Stage IIIC	3	G2	2	Dead	640	3.23041	1
TCGA-VQ-AA6A	MALE	1	56	0	T4	4	N3a	3	M0	0	Stage IIIC	3	G2	2	Alive	1184	2.38976	1
TCGA-BR-7717	MALE	1	63	1	T4	4	N1	1	M0	0	Stage IV	4	G2	2	Dead	552	2.00979	1
TCGA-VQ-A8PP	MALE	1	76	1	T4	4	N1	1	M0	0	Stage IV	4	G2	2	Dead	712	1.4843	0
TCGA-VQ-A922	MALE	1	70	1	T4	4	N1	1	M0	0	Stage IV	4	G2	2	Dead	275	2.71332	1
TCGA-CG-5732	MALE	1	66	1	T2	2	N3	3	M0	0	Stage IV	4	G2	2	Dead	2100	1.72131	0
TCGA-VQ-A928	MALE	1	49	0	T3	3	N3	3	M0	0	Stage IV	4	G2	2	Dead	174	2.53664	1
TCGA-VQ-A91N	FEMALE	0	59	0	T4	4	N3	3	M0	0	Stage IV	4	G2	2	Dead	570	1.52278	0
TCGA-CD-8529	MALE	1	65	1	T4	4	N0	0	M1	1	Stage IV	4	G2	2	Alive	374	1.82794	0
TCGA-R5-A7O7	MALE	1	51	0	T3	3	N1	1	M1	1	Stage IV	4	G2	2	Alive	1389	1.76987	0
TCGA-VQ-A8E7	MALE	1	59	0	T3	3	N1	1	M1	1	Stage IV	4	G2	2	Alive	1138	1.99048	1
TCGA-VQ-A8PQ	FEMALE	0	50	0	T4	4	N1	1	M1	1	Stage IV	4	G2	2	Dead	476	2.40606	1
TCGA-CG-4460	FEMALE	0	66	1	T4	4	N1	1	M1	1	Stage IV	4	G2	2	Dead	669	2.21431	1
TCGA-R5-A7ZF	FEMALE	0	65	1	T4a	4	N1	1	M1	1	Stage IV	4	G2	2	Dead	259	1.2476	0
TCGA-CG-5716	MALE	1	86	1	T4a	4	N2	2	M1	1	Stage IV	4	G2	2	Alive	0	1.37865	0
TCGA-BR-8680	MALE	1	45	0	T4b	4	N2	2	M1	1	Stage IV	4	G2	2	Alive	972	1.8778	0
TCGA-IN-A6RJ	MALE	1	64	1	T1b	1	N0	0	M0	0	Stage IA	1	G3	3	Alive	379	1.45096	0
TCGA-RD-A8N2	FEMALE	0	59	0	T2	2	N0	0	M0	0	Stage IB	1	G3	3	Alive	3540	1.74685	0
TCGA-CG-4442	MALE	1	85	1	T2	2	N0	0	M0	0	Stage IB	1	G3	3	Alive	0	1.52325	0
TCGA-BR-7707	FEMALE	0	69	1	T2	2	N0	0	M0	0	Stage IB	1	G3	3	Alive	1090	0.87548	0
TCGA-RD-A7BW	FEMALE	0	68	1	T2	2	N0	0	M0	0	Stage IB	1	G3	3	Dead	156	1.82107	0
TCGA-CG-5720	MALE	1	71	1	T2	2	N0	0	M0	0	Stage IB	1	G3	3	Dead	30	1.3015	0
TCGA-BR-8368	FEMALE	0	84	1	T2	2	N0	0	M0	0	Stage IB	1	G3	3	Alive	131	1.84687	0
TCGA-D7-A6F0	FEMALE	0	79	1	T2	2	N0	0	M0	0	Stage IB	1	G3	3	Alive	678	3.25938	1
TCGA-CG-5725	MALE	1	72	1	T2	2	N0	0	M0	0	Stage IB	1	G3	3	Dead	457	2.85395	1
TCGA-D7-6522	MALE	1	58	0	T2	2	N0	0	M0	0	Stage IB	1	G3	3	Alive	566	1.74863	0
TCGA-F1-6874	MALE	1	79	1	T2	2	N0	0	M0	0	Stage IB	1	G3	3	Alive	440	1.28489	0
TCGA-B7-5818	MALE	1	62	1	T2	2	N0	0	M0	0	Stage IB	1	G3	3	Alive	356	2.28054	1
TCGA-D7-A6F2	MALE	1	62	1	T2	2	N0	0	M0	0	Stage IB	1	G3	3	Alive	476	2.49601	1
TCGA-RD-A7C1	MALE	1	82	1	T2	2	N0	0	M0	0	Stage IB	1	G3	3	Dead	507	1.50722	0
TCGA-CG-4477	FEMALE	0	58	0	T2a	2	N0	0	M0	0	Stage IB	1	G3	3	Alive	942	1.63414	0
TCGA-FP-8209	MALE	1	49	0	T2a	2	N0	0	M0	0	Stage IB	1	G3	3	Dead	1811	2.49545	1
TCGA-KB-A6F7	FEMALE	0	54	0	T1	1	N1	1	M0	0	Stage IB	1	G3	3	Alive	1935	3.21485	1
TCGA-CD-8533	MALE	1	48	0	T3	3	N0	0	M0	0	Stage II	2	G3	3	Alive	468	3.76573	1
TCGA-CD-8524	FEMALE	0	61	1	T3	3	N0	0	M0	0	Stage II	2	G3	3	Alive	388	2.05361	1
TCGA-CD-8530	MALE	1	51	0	T3	3	N0	0	M0	0	Stage II	2	G3	3	Alive	377	2.04588	1
TCGA-BR-7704	FEMALE	0	69	1	T3	3	N0	0	M0	0	Stage II	2	G3	3	Alive	1072	2.42644	1
TCGA-CD-8534	MALE	1	41	0	T3	3	N0	0	M0	0	Stage II	2	G3	3	Alive	367	2.26588	1
TCGA-CD-5813	MALE	1	60	1	T3	3	N0	0	M0	0	Stage II	2	G3	3	Dead	377	1.88577	1
TCGA-CD-5803	FEMALE	0	78	1	T3	3	N0	0	M0	0	Stage II	2	G3	3	Dead	341	1.88965	1
TCGA-BR-8286	MALE	1	49	0	T3	3	N0	0	M0	0	Stage II	2	G3	3	Alive	895	1.54901	0
TCGA-RD-A8N9	FEMALE	0	63	1	T2	2	N1	1	M0	0	Stage II	2	G3	3	Alive	1083	1.7294	0
TCGA-D7-6524	MALE	1	53	0	T2	2	N1	1	M0	0	Stage II	2	G3	3	Alive	543	1.81153	0
TCGA-CG-5723	MALE	1	83	1	T2	2	N1	1	M0	0	Stage II	2	G3	3	Alive	2496	1.37817	0
TCGA-CD-5799	MALE	1	45	0	T2	2	N1	1	M0	0	Stage II	2	G3	3	Alive	396	1.67005	0
TCGA-BR-4279	MALE	1	43	0	T2a	2	N1	1	M0	0	Stage II	2	G3	3	Dead	291	0.780052	0
TCGA-CG-4305	MALE	1	69	1	T2a	2	N1	1	M0	0	Stage II	2	G3	3	Alive	485	1.65791	0
TCGA-CG-5717	MALE	1	58	0	T2b	2	N1	1	M0	0	Stage II	2	G3	3	Dead	212	1.40676	0
TCGA-KB-A93J	MALE	1	78	1	T2b	2	N1	1	M0	0	Stage II	2	G3	3	Alive	1124	1.8094	0
TCGA-D7-8573	MALE	1	57	0	T3	3	N0	0	M0	0	Stage IIA	2	G3	3	Alive	593	1.88406	0
TCGA-HU-A4GT	FEMALE	0	71	1	T3	3	N0	0	M0	0	Stage IIA	2	G3	3	Alive	198	0.997643	0
TCGA-BR-8487	FEMALE	0	64	1	T3	3	N0	0	M0	0	Stage IIA	2	G3	3	Alive	34	0.639275	0
TCGA-BR-6454	MALE	1	58	0	T3	3	N0	0	M0	0	Stage IIA	2	G3	3	Alive	0	2.24975	1
TCGA-MX-A663	MALE	1	66	1	T3	3	N0	0	M0	0	Stage IIA	2	G3	3	Dead	300	3.12333	1
TCGA-BR-A44T	FEMALE	0	53	0	T3	3	N0	0	M0	0	Stage IIA	2	G3	3	Alive	1038	2.32004	1
TCGA-BR-6803	FEMALE	0	54	0	T3	3	N0	0	M0	0	Stage IIA	2	G3	3	Alive	949	1.88962	1
TCGA-BR-6707	MALE	1	75	1	T3	3	N0	0	M0	0	Stage IIA	2	G3	3	Dead	605	2.56681	1
TCGA-VQ-A8P5	MALE	1	67	1	T3	3	N0	0	M0	0	Stage IIA	2	G3	3	Dead	235	1.94474	1
TCGA-BR-6852	FEMALE	0	64	1	T3	3	N0	0	M0	0	Stage IIA	2	G3	3	Alive	1367	1.53306	0
TCGA-BR-A4J9	MALE	1	55	0	T3	3	N0	0	M0	0	Stage IIA	2	G3	3	Alive	14	1.8966	1
TCGA-BR-6452	FEMALE	0	78	1	T3	3	N0	0	M0	0	Stage IIA	2	G3	3	Alive	1055	1.79898	0
TCGA-BR-6457	MALE	1	69	1	T3	3	N0	0	M0	0	Stage IIA	2	G3	3	Alive	416	1.84871	0
TCGA-BR-8366	FEMALE	0	80	1	T3	3	N0	0	M0	0	Stage IIA	2	G3	3	Alive	29	1.86102	0
TCGA-BR-8365	FEMALE	0	70	1	T3	3	N0	0	M0	0	Stage IIA	2	G3	3	Dead	533	2.1405	1
TCGA-IN-AB1X	FEMALE	0	78	1	T3	3	N0	0	M0	0	Stage IIA	2	G3	3	Alive	411	2.24885	1
TCGA-VQ-A8E3	MALE	1	79	1	T3	3	N0	0	M0	0	Stage IIA	2	G3	3	Dead	661	2.37921	1
TCGA-CD-A4MG	MALE	1	76	1	T3	3	N0	0	M0	0	Stage IIA	2	G3	3	Dead	200	1.76807	0
TCGA-CD-A489	MALE	1	58	0	T3	3	N0	0	M0	0	Stage IIA	2	G3	3	Dead	344	2.09493	1
TCGA-BR-6566	FEMALE	0	64	1	T3	3	N0	0	M0	0	Stage IIA	2	G3	3	Alive	997	1.46923	0
TCGA-BR-6453	MALE	1	54	0	T2	2	N1	1	M0	0	Stage IIA	2	G3	3	Alive	485	1.91792	1
TCGA-VQ-A8PO	MALE	1	74	1	T4a	4	N0	0	M0	0	Stage IIB	2	G3	3	Dead	282	1.23709	0
TCGA-VQ-A94U	MALE	1	70	1	T4a	4	N0	0	M0	0	Stage IIB	2	G3	3	Alive	819	1.97837	1
TCGA-BR-8295	FEMALE	0	60	1	T4a	4	N0	0	M0	0	Stage IIB	2	G3	3	Dead	67	3.33392	1
TCGA-BR-8588	FEMALE	0	55	0	T4a	4	N0	0	M0	0	Stage IIB	2	G3	3	Alive	389	1.8941	1
TCGA-BR-8682	MALE	1	52	0	T4a	4	N0	0	M0	0	Stage IIB	2	G3	3	Alive	991	2.03225	1
TCGA-BR-7851	MALE	1	74	1	T4a	4	N0	0	M0	0	Stage IIB	2	G3	3	Dead	574	1.71867	0
TCGA-HU-8602	FEMALE	0	58	0	T4a	4	N0	0	M0	0	Stage IIB	2	G3	3	Alive	679	0.681591	0
TCGA-CG-4475	MALE	1	76	1	T3	3	N1	1	M0	0	Stage IIB	2	G3	3	Alive	699	1.6431	0
TCGA-HU-A4GD	MALE	1	56	0	T3	3	N1	1	M0	0	Stage IIB	2	G3	3	Alive	692	2.21229	1
TCGA-D7-A747	MALE	1	57	0	T3	3	N1	1	M0	0	Stage IIB	2	G3	3	Dead	255	2.03773	1
TCGA-BR-7722	MALE	1	62	1	T3	3	N1	1	M0	0	Stage IIB	2	G3	3	Dead	466	1.73762	0
TCGA-BR-6458	FEMALE	0	57	0	T3	3	N1	1	M0	0	Stage IIB	2	G3	3	Dead	588	2.22976	1
TCGA-BR-8381	MALE	1	51	0	T3	3	N1	1	M0	0	Stage IIB	2	G3	3	Alive	224	2.48816	1
TCGA-D7-A4YX	MALE	1	63	1	T3	3	N1	1	M0	0	Stage IIB	2	G3	3	Alive	1108	2.17151	1
TCGA-HU-A4G8	FEMALE	0	71	1	T3	3	N1	1	M0	0	Stage IIB	2	G3	3	Alive	690	2.07696	1
TCGA-IN-7806	MALE	1	50	0	T3	3	N1	1	M0	0	Stage IIB	2	G3	3	Alive	1106	2.34389	1
TCGA-IN-A7NT	FEMALE	0	73	1	T3	3	N1	1	M0	0	Stage IIB	2	G3	3	Alive	323	2.40196	1
TCGA-HU-A4G2	MALE	1	45	0	T3	3	N1	1	M0	0	Stage IIB	2	G3	3	Alive	739	1.26509	0
TCGA-BR-6563	MALE	1	60	1	T3	3	N1	1	M0	0	Stage IIB	2	G3	3	Alive	1190	1.62198	0
TCGA-CD-A487	MALE	1	51	0	T3	3	N1	1	M0	0	Stage IIB	2	G3	3	Alive	374	1.58324	0
TCGA-BR-6455	MALE	1	59	0	T3	3	N1	1	M0	0	Stage IIB	2	G3	3	Dead	422	2.51369	1
TCGA-HU-A4GU	MALE	1	73	1	T3	3	N1	1	M0	0	Stage IIB	2	G3	3	Alive	200	1.76708	0
TCGA-CD-A48C	FEMALE	0	79	1	T3	3	N1	1	M0	0	Stage IIB	2	G3	3	Dead	353	1.94264	1
TCGA-HU-A4HB	MALE	1	68	1	T2	2	N2	2	M0	0	Stage IIB	2	G3	3	Dead	477	1.58979	0
TCGA-BR-8060	FEMALE	0	75	1	T2	2	N2	2	M0	0	Stage IIB	2	G3	3	Dead	348	2.2649	1
TCGA-HU-A4H4	FEMALE	0	53	0	T2	2	N2	2	M0	0	Stage IIB	2	G3	3	Alive	725	1.71428	0
TCGA-D7-A4Z0	FEMALE	0	60	1	T2	2	N2	2	M0	0	Stage IIB	2	G3	3	Alive	449	1.54275	0
TCGA-D7-A6EV	FEMALE	0	71	1	T2	2	N2	2	M0	0	Stage IIB	2	G3	3	Alive	342	1.47097	0
TCGA-IN-8663	MALE	1	68	1	T2	2	N2	2	M0	0	Stage IIB	2	G3	3	Dead	103	2.15588	1
TCGA-BR-8059	MALE	1	72	1	T4	4	N1	1	M0	0	Stage III	3	G3	3	Dead	439	1.57335	0
TCGA-CD-8528	FEMALE	0	43	0	T4	4	N0	0	M0	0	Stage IIIA	3	G3	3	Alive	375	1.30507	0
TCGA-BR-4361	FEMALE	0	66	1	T4	4	N0	0	M0	0	Stage IIIA	3	G3	3	Alive	0	1.39634	0
TCGA-CD-5801	MALE	1	69	1	T3	3	N1	1	M0	0	Stage IIIA	3	G3	3	Dead	401	1.18132	0
TCGA-VQ-A8PC	MALE	1	65	1	T3	3	N1	1	M0	0	Stage IIIA	3	G3	3	Dead	1407	1.90597	1
TCGA-CD-8526	FEMALE	0	73	1	T3	3	N1	1	M0	0	Stage IIIA	3	G3	3	Alive	381	3.05928	1
TCGA-RD-A8NB	FEMALE	0	80	1	T3	3	N1	1	M0	0	Stage IIIA	3	G3	3	Dead	513	1.81814	0
TCGA-CD-8531	FEMALE	0	66	1	T3	3	N1	1	M0	0	Stage IIIA	3	G3	3	Alive	383	1.7389	0
TCGA-CD-8525	FEMALE	0	82	1	T3	3	N1	1	M0	0	Stage IIIA	3	G3	3	Alive	383	2.02308	1
TCGA-RD-A7BS	MALE	1	46	0	T3	3	N1	1	M0	0	Stage IIIA	3	G3	3	Dead	336	1.49972	0
TCGA-FP-8210	MALE	1	48	0	T3	3	N1	1	M0	0	Stage IIIA	3	G3	3	Dead	153	2.2626	1
TCGA-CD-8535	MALE	1	59	0	T3	3	N1	1	M0	0	Stage IIIA	3	G3	3	Alive	390	2.44764	1
TCGA-CG-5734	MALE	1	68	1	T3	3	N1	1	M0	0	Stage IIIA	3	G3	3	Dead	243	1.05904	0
TCGA-BR-4253	FEMALE	0	80	1	T3	3	N1	1	M0	0	Stage IIIA	3	G3	3	Dead	124	2.08428	1
TCGA-MX-A5UG	MALE	1	78	1	T3	3	N1	1	M0	0	Stage IIIA	3	G3	3	Dead	113	2.3198	1
TCGA-RD-A8N4	FEMALE	0	58	0	T3	3	N1	1	M0	0	Stage IIIA	3	G3	3	Alive	2171	2.13637	1
TCGA-VQ-A923	MALE	1	90	1	T3	3	N1	1	M0	0	Stage IIIA	3	G3	3	Dead	0	2.34057	1
TCGA-HU-A4GY	FEMALE	0	76	1	T4	4	N1	1	M0	0	Stage IIIA	3	G3	3	Alive	8	2.23633	1
TCGA-BR-7959	MALE	1	59	0	T4a	4	N1	1	M0	0	Stage IIIA	3	G3	3	Alive	1010	2.02527	1
TCGA-VQ-A8PU	FEMALE	0	72	1	T4a	4	N1	1	M0	0	Stage IIIA	3	G3	3	Dead	832	1.01064	0
TCGA-BR-A4J5	MALE	1	56	0	T4a	4	N1	1	M0	0	Stage IIIA	3	G3	3	Alive	862	1.78146	0
TCGA-D7-6525	MALE	1	58	0	T2	2	N2	2	M0	0	Stage IIIA	3	G3	3	Dead	406	2.17152	1
TCGA-RD-A8N6	FEMALE	0	78	1	T2	2	N2	2	M0	0	Stage IIIA	3	G3	3	Dead	272	2.67172	1
TCGA-CG-4444	MALE	1	76	1	T2b	2	N2	2	M0	0	Stage IIIA	3	G3	3	Alive	1431	1.96845	1
TCGA-D7-6520	MALE	1	53	0	T2b	2	N2	2	M0	0	Stage IIIA	3	G3	3	Alive	573	2.18773	1
TCGA-D7-8575	MALE	1	75	1	T3	3	N2	2	M0	0	Stage IIIA	3	G3	3	Dead	554	2.27551	1
TCGA-VQ-A8E0	MALE	1	68	1	T3	3	N2	2	M0	0	Stage IIIA	3	G3	3	Dead	562	1.63926	0
TCGA-D7-A6EX	FEMALE	0	72	1	T3	3	N2	2	M0	0	Stage IIIA	3	G3	3	Alive	344	2.6575	1
TCGA-BR-6564	FEMALE	0	46	0	T3	3	N2	2	M0	0	Stage IIIA	3	G3	3	Dead	794	1.92716	1
TCGA-D7-A6EZ	MALE	1	66	1	T3	3	N2	2	M0	0	Stage IIIA	3	G3	3	Alive	297	2.0922	1
TCGA-FP-A4BF	MALE	1	68	1	T3	3	N2	2	M0	0	Stage IIIA	3	G3	3	Dead	168	1.50244	0
TCGA-BR-6802	MALE	1	65	1	T3	3	N2	2	M0	0	Stage IIIA	3	G3	3	Alive	940	1.67909	0
TCGA-MX-A5UJ	FEMALE	0	86	1	T3	3	N2	2	M0	0	Stage IIIA	3	G3	3	Alive	600	1.37344	0
TCGA-D7-5578	MALE	1	80	1	T3	3	N2	2	M0	0	Stage IIIA	3	G3	3	Alive	385	1.81423	0
TCGA-D7-6818	MALE	1	53	0	T2	2	N3	3	M0	0	Stage IIIA	3	G3	3	Alive	321	2.14498	1
TCGA-D7-8574	MALE	1	72	1	T2	2	N3a	3	M0	0	Stage IIIA	3	G3	3	Alive	523	2.47618	1
TCGA-VQ-A91E	FEMALE	0	67	1	T4b	4	N0	0	M0	0	Stage IIIB	3	G3	3	Alive	664	1.54747	0
TCGA-BR-7958	MALE	1	60	1	T4b	4	N0	0	M0	0	Stage IIIB	3	G3	3	Alive	899	1.97858	1
TCGA-BR-8592	FEMALE	0	63	1	T4b	4	N1	1	M0	0	Stage IIIB	3	G3	3	Dead	191	2.34532	1
TCGA-BR-8686	MALE	1	69	1	T4b	4	N1	1	M0	0	Stage IIIB	3	G3	3	Dead	635	2.57722	1
TCGA-BR-8589	MALE	1	56	0	T4b	4	N1	1	M0	0	Stage IIIB	3	G3	3	Alive	825	2.06734	1
TCGA-RD-A8MV	MALE	1	56	0	T3	3	N2	2	M0	0	Stage IIIB	3	G3	3	Alive	3720	1.85879	0
TCGA-RD-A8MW	MALE	1	72	1	T3	3	N2	2	M0	0	Stage IIIB	3	G3	3	Dead	1153	2.16899	1
TCGA-VQ-A94T	MALE	1	73	1	T3	3	N2	2	M0	0	Stage IIIB	3	G3	3	Dead	342	2.14462	1
TCGA-RD-A8N0	FEMALE	0	53	0	T3	3	N2	2	M0	0	Stage IIIB	3	G3	3	Alive	1236	1.81169	0
TCGA-RD-A8N1	MALE	1	70	1	T3	3	N2	2	M0	0	Stage IIIB	3	G3	3	Alive	3519	2.17718	1
TCGA-VQ-A91X	MALE	1	74	1	T3	3	N2	2	M0	0	Stage IIIB	3	G3	3	Dead	289	1.71754	0
TCGA-R5-A805	MALE	1	71	1	T3	3	N2	2	M0	0	Stage IIIB	3	G3	3	Dead	281	1.66541	0
TCGA-BR-A4IV	MALE	1	47	0	T4a	4	N2	2	M0	0	Stage IIIB	3	G3	3	Dead	869	2.11444	1
TCGA-BR-8683	MALE	1	75	1	T4a	4	N2	2	M0	0	Stage IIIB	3	G3	3	Dead	300	2.33243	1
TCGA-BR-A4J4	MALE	1	39	0	T4a	4	N2	2	M0	0	Stage IIIB	3	G3	3	Alive	16	1.21114	0
TCGA-HU-A4GC	MALE	1	74	1	T4a	4	N2	2	M0	0	Stage IIIB	3	G3	3	Alive	99	1.75315	0
TCGA-BR-A4PF	MALE	1	72	1	T4a	4	N2	2	M0	0	Stage IIIB	3	G3	3	Alive	35	2.1721	1
TCGA-VQ-AA6J	MALE	1	75	1	T4a	4	N2	2	M0	0	Stage IIIB	3	G3	3	Alive	838	2.50403	1
TCGA-BR-8058	FEMALE	0	53	0	T4a	4	N2	2	M0	0	Stage IIIB	3	G3	3	Alive	1133	1.63123	0
TCGA-HU-8608	MALE	1	70	1	T4a	4	N2	2	M0	0	Stage IIIB	3	G3	3	Alive	641	2.42531	1
TCGA-IN-A7NU	MALE	1	69	1	T3	3	N3	3	M0	0	Stage IIIB	3	G3	3	Alive	356	1.37154	0
TCGA-D7-8570	MALE	1	44	0	T3	3	N3a	3	M0	0	Stage IIIB	3	G3	3	Alive	752	2.20727	1
TCGA-BR-8371	MALE	1	62	1	T3	3	N3a	3	M0	0	Stage IIIB	3	G3	3	Dead	359	2.07609	1
TCGA-D7-A4YU	MALE	1	73	1	T3	3	N3a	3	M0	0	Stage IIIB	3	G3	3	Alive	500	1.96988	1
TCGA-BR-6705	FEMALE	0	68	1	T3	3	N3a	3	M0	0	Stage IIIB	3	G3	3	Dead	779	2.48161	1
TCGA-BR-A4J8	FEMALE	0	71	1	T3	3	N3a	3	M0	0	Stage IIIB	3	G3	3	Alive	411	1.13451	0
TCGA-BR-8677	FEMALE	0	74	1	T3	3	N3a	3	M0	0	Stage IIIB	3	G3	3	Alive	813	2.13274	1
TCGA-BR-8369	FEMALE	0	76	1	T3	3	N3a	3	M0	0	Stage IIIB	3	G3	3	Alive	427	1.85923	0
TCGA-BR-7723	MALE	1	59	0	T3	3	N3a	3	M0	0	Stage IIIB	3	G3	3	Dead	874	3.0961	1
TCGA-VQ-A8DT	MALE	1	43	0	T3	3	N3a	3	M0	0	Stage IIIB	3	G3	3	Alive	1484	1.22104	0
TCGA-D7-A6EY	FEMALE	0	72	1	T3	3	N3a	3	M0	0	Stage IIIB	3	G3	3	Dead	348	1.76945	0
TCGA-BR-8676	MALE	1	59	0	T3	3	N3a	3	M0	0	Stage IIIB	3	G3	3	Alive	229	2.65215	1
TCGA-BR-8367	MALE	1	55	0	T3	3	N3a	3	M0	0	Stage IIIB	3	G3	3	Dead	801	1.91729	1
TCGA-BR-6709	FEMALE	0	57	0	T3	3	N3a	3	M0	0	Stage IIIB	3	G3	3	Dead	370	1.80524	0
TCGA-BR-A44U	MALE	1	70	1	T3	3	N3a	3	M0	0	Stage IIIB	3	G3	3	Dead	422	1.00057	0
TCGA-D7-8576	FEMALE	0	54	0	T3	3	N3a	3	M0	0	Stage IIIB	3	G3	3	Dead	446	1.42862	0
TCGA-VQ-A8PE	MALE	1	78	1	T3	3	N3a	3	M0	0	Stage IIIB	3	G3	3	Dead	675	3.19095	1
TCGA-F1-A448	MALE	1	70	1	T3	3	N3b	3	M0	0	Stage IIIB	3	G3	3	Alive	647	1.50921	0
TCGA-VQ-A8PF	MALE	1	76	1	T3	3	N3b	3	M0	0	Stage IIIB	3	G3	3	Dead	76	2.24994	1
TCGA-BR-8296	FEMALE	0	58	0	T4b	4	N2	2	M0	0	Stage IIIC	3	G3	3	Dead	474	1.43002	0
TCGA-HU-A4GX	FEMALE	0	70	1	T4b	4	N2	2	M0	0	Stage IIIC	3	G3	3	Alive	616	1.53474	0
TCGA-BR-8687	FEMALE	0	67	1	T4b	4	N2	2	M0	0	Stage IIIC	3	G3	3	Dead	250	1.87841	0
TCGA-BR-8590	MALE	1	62	1	T4b	4	N2	2	M0	0	Stage IIIC	3	G3	3	Dead	284	1.93134	1
TCGA-BR-8364	FEMALE	0	42	0	T4b	4	N2	2	M0	0	Stage IIIC	3	G3	3	Alive	675	2.14864	1
TCGA-BR-8384	MALE	1	69	1	T4b	4	N2	2	M0	0	Stage IIIC	3	G3	3	Alive	113	2.31279	1
TCGA-BR-8361	FEMALE	0	71	1	T4b	4	N2	2	M0	0	Stage IIIC	3	G3	3	Alive	946	1.02222	0
TCGA-B7-A5TI	MALE	1	52	0	T4	4	N3	3	M0	0	Stage IIIC	3	G3	3	Alive	595	2.40815	1
TCGA-BR-8080	FEMALE	0	72	1	T4	4	N3a	3	M0	0	Stage IIIC	3	G3	3	Dead	292	2.04822	1
TCGA-BR-8485	FEMALE	0	68	1	T4	4	N3a	3	M0	0	Stage IIIC	3	G3	3	Alive	280	3.38047	1
TCGA-HU-A4GJ	FEMALE	0	60	1	T4	4	N3a	3	M0	0	Stage IIIC	3	G3	3	Alive	650	1.86542	0
TCGA-BR-8284	FEMALE	0	72	1	T4a	4	N3a	3	M0	0	Stage IIIC	3	G3	3	Dead	245	1.8636	0
TCGA-BR-8380	MALE	1	55	0	T4a	4	N3a	3	M0	0	Stage IIIC	3	G3	3	Alive	21	2.03579	1
TCGA-BR-8591	MALE	1	79	1	T4a	4	N3a	3	M0	0	Stage IIIC	3	G3	3	Alive	856	0.778113	0
TCGA-HF-A5NB	FEMALE	0	75	1	T4a	4	N3a	3	M0	0	Stage IIIC	3	G3	3	Alive	928	1.74873	0
TCGA-VQ-AA6K	MALE	1	59	0	T4a	4	N3a	3	M0	0	Stage IIIC	3	G3	3	Dead	378	2.32536	1
TCGA-BR-A4CR	FEMALE	0	70	1	T4b	4	N3a	3	M0	0	Stage IIIC	3	G3	3	Alive	0	2.16749	1
TCGA-BR-8372	MALE	1	63	1	T4b	4	N3a	3	M0	0	Stage IIIC	3	G3	3	Alive	951	1.11379	0
TCGA-BR-8382	FEMALE	0	67	1	T4b	4	N3a	3	M0	0	Stage IIIC	3	G3	3	Dead	762	1.58833	0
TCGA-BR-A4CS	MALE	1	77	1	T4b	4	N3a	3	M0	0	Stage IIIC	3	G3	3	Dead	45	2.57103	1
TCGA-CG-4476	MALE	1	69	1	T4b	4	N3a	3	M0	0	Stage IIIC	3	G3	3	Alive	0	1.86501	0
TCGA-VQ-A91Y	MALE	1	67	1	T4a	4	N3b	3	M0	0	Stage IIIC	3	G3	3	Dead	296	2.2033	1
TCGA-HU-A4H0	MALE	1	72	1	T4a	4	N3b	3	M0	0	Stage IIIC	3	G3	3	Alive	64	2.25365	1
TCGA-HU-A4H3	FEMALE	0	56	0	T4a	4	N3b	3	M0	0	Stage IIIC	3	G3	3	Alive	882	1.56492	0
TCGA-CG-5721	MALE	1	58	0	T4	4	N1	1	M0	0	Stage IV	4	G3	3	Alive	183	1.2544	0
TCGA-CG-4438	MALE	1	56	0	T4	4	N2	2	M0	0	Stage IV	4	G3	3	Alive	1645	2.0546	1
TCGA-BR-4368	FEMALE	0	78	1	T4	4	N2	2	M0	0	Stage IV	4	G3	3	Alive	0	1.07817	0
TCGA-CG-4469	MALE	1	70	1	T3	3	N3	3	M0	0	Stage IV	4	G3	3	Dead	215	1.85117	0
TCGA-RD-A7BT	MALE	1	66	1	T3	3	N3	3	M0	0	Stage IV	4	G3	3	Dead	262	1.95156	1
TCGA-VQ-A91Q	MALE	1	61	1	T3	3	N3	3	M0	0	Stage IV	4	G3	3	Dead	633	2.35589	1
TCGA-VQ-A8PM	MALE	1	56	0	T4	4	N3	3	M0	0	Stage IV	4	G3	3	Dead	57	2.03911	1
TCGA-R5-A7ZI	FEMALE	0	44	0	T4	4	N1	1	M1	1	Stage IV	4	G3	3	Alive	2267	1.77758	0
TCGA-CG-4301	FEMALE	0	75	1	T4	4	N1	1	M1	1	Stage IV	4	G3	3	Alive	92	1.72199	0
TCGA-CG-4306	MALE	1	90	1	T3	3	N2	2	M1	1	Stage IV	4	G3	3	Dead	1	1.11312	0
TCGA-CG-5722	FEMALE	0	67	1	T3	3	N2	2	M1	1	Stage IV	4	G3	3	Alive	30	2.28562	1
TCGA-IN-A7NR	FEMALE	0	64	1	T3	3	N3	3	M1	1	Stage IV	4	G3	3	Alive	198	1.82341	0
TCGA-CG-4440	FEMALE	0	68	1	T3	3	N3	3	M1	1	Stage IV	4	G3	3	Dead	122	1.38109	0
TCGA-CG-4462	FEMALE	0	72	1	T3	3	N3	3	M1	1	Stage IV	4	G3	3	Dead	0	1.82602	0
TCGA-CG-5724	MALE	1	59	0	T3	3	N3	3	M1	1	Stage IV	4	G3	3	Dead	366	1.40585	0
TCGA-VQ-A8DZ	MALE	1	70	1	T4	4	N3	3	M1	1	Stage IV	4	G3	3	Dead	396	2.29631	1
TCGA-CG-4465	FEMALE	0	69	1	T4	4	N3	3	M1	1	Stage IV	4	G3	3	Dead	274	1.33344	0
TCGA-D7-A748	FEMALE	0	41	0	T4a	4	N3	3	M1	1	Stage IV	4	G3	3	Dead	132	1.31356	0

## Sheet: DNMT3B
Ensembl_ID	sex	sex-TJ	age	age-TJ	T	T-TJ	N	N-TJ	M	M-TJ	stage	stage-TJ	grade	grade-TJ	EVENT	OS	DNMT3B	DNMT3B
TCGA-HU-8244	FEMALE	0	77	1	T1a	1	N0	0	M0	0	Stage IA	1	G1	1	Alive	742	1.45173	1	1.24217
TCGA-KB-A93G	MALE	1	68	1	T2	2	N0	0	M0	0	Stage IB	1	G1	1	Alive	613	0.969997	0
TCGA-CD-5800	FEMALE	0	51	0	T3	3	N0	0	M0	0	Stage II	2	G1	1	Alive	400	3.65553	1
TCGA-KB-A93H	FEMALE	0	79	1	T3	3	N1	1	M0	0	Stage IIB	2	G1	1	Alive	1145	1.92541	1
TCGA-VQ-A927	MALE	1	81	1	T3	3	N3	3	M0	0	Stage IIIB	3	G1	1	Dead	200	0.774735	0
TCGA-VQ-A91A	MALE	1	67	1	T3	3	N3a	3	M0	0	Stage IIIB	3	G1	1	Alive	1200	1.6151	1
TCGA-CG-5719	FEMALE	0	54	0	T4	4	N0	0	M1	1	Stage IV	4	G1	1	Alive	31	1.07652	0
TCGA-IN-A6RI	MALE	1	45	0	T1b	1	N0	0	M0	0	Stage I	1	G2	2	Alive	559	2.3894	1
TCGA-CG-5726	MALE	1	73	1	T1	1	N0	0	M0	0	Stage IA	1	G2	2	Dead	881	1.5202	1
TCGA-VQ-A8PX	MALE	1	51	0	T1	1	N0	0	M0	0	Stage IA	1	G2	2	Alive	1964	1.11251	0
TCGA-CG-4443	MALE	1	68	1	T1	1	N0	0	M0	0	Stage IA	1	G2	2	Alive	912	1.06574	0
TCGA-HU-A4G9	FEMALE	0	67	1	T1a	1	N0	0	M0	0	Stage IA	1	G2	2	Alive	736	1.06181	0
TCGA-IN-A6RS	MALE	1	76	1	T1b	1	N0	0	M0	0	Stage IA	1	G2	2	Alive	383	1.67002	1
TCGA-HU-A4GH	MALE	1	75	1	T1b	1	N0	0	M0	0	Stage IA	1	G2	2	Alive	358	1.32226	1
TCGA-BR-8486	FEMALE	0	90	1	T1b	1	N0	0	M0	0	Stage IA	1	G2	2	Alive	0	0.992435	0
TCGA-IN-AB1V	MALE	1	63	1	T1b	1	N0	0	M0	0	Stage IA	1	G2	2	Alive	479	0.898902	0
TCGA-HU-8610	MALE	1	75	1	T1b	1	N0	0	M0	0	Stage IA	1	G2	2	Alive	23	2.90652	1
TCGA-F1-6875	MALE	1	79	1	T2	2	N0	0	M0	0	Stage IA	1	G2	2	Dead	2197	2.30495	1
TCGA-BR-8679	FEMALE	0	63	1	T2	2	N0	0	M0	0	Stage IB	1	G2	2	Alive	0	1.96066	1
TCGA-D7-8578	MALE	1	72	1	T2	2	N0	0	M0	0	Stage IB	1	G2	2	Alive	643	1.19923	0
TCGA-D7-6822	MALE	1	77	1	T2	2	N0	0	M0	0	Stage IB	1	G2	2	Alive	375	2.75713	1
TCGA-VQ-A8DV	MALE	1	48	0	T2	2	N0	0	M0	0	Stage IB	1	G2	2	Dead	403	3.17618	1
TCGA-CG-4436	MALE	1	57	0	T2	2	N0	0	M0	0	Stage IB	1	G2	2	Alive	243	1.27142	1
TCGA-BR-8678	MALE	1	76	1	T2	2	N0	0	M0	0	Stage IB	1	G2	2	Alive	754	3.06295	1
TCGA-D7-6528	FEMALE	0	70	1	T2	2	N0	0	M0	0	Stage IB	1	G2	2	Alive	463	1.01171	0
TCGA-BR-6710	MALE	1	41	0	T2	2	N0	0	M0	0	Stage IB	1	G2	2	Alive	273	0.312768	0
TCGA-CG-4466	FEMALE	0	81	1	T2a	2	N0	0	M0	0	Stage IB	1	G2	2	Alive	577	2.10781	1
TCGA-BR-4267	MALE	1	51	0	T2a	2	N0	0	M0	0	Stage IB	1	G2	2	Dead	188	0.828604	0
TCGA-VQ-A92D	MALE	1	67	1	T2b	2	N0	0	M0	0	Stage IB	1	G2	2	Alive	2032	1.56146	1
TCGA-HU-A4H8	MALE	1	77	1	T1b	1	N1	1	M0	0	Stage IB	1	G2	2	Alive	270	1.35631	1
TCGA-VQ-A8PB	FEMALE	0	65	1	T3	3	N0	0	M0	0	Stage II	2	G2	2	Dead	1043	0.97203	0
TCGA-CD-8532	MALE	1	52	0	T3	3	N0	0	M0	0	Stage II	2	G2	2	Dead	354	0.773846	0
TCGA-VQ-A924	MALE	1	69	1	T3	3	N0	0	M0	0	Stage II	2	G2	2	Dead	1686	1.65709	1
TCGA-CD-5798	MALE	1	82	1	T3	3	N0	0	M0	0	Stage II	2	G2	2	Alive	408	0.609369	0
TCGA-CG-4437	MALE	1	83	1	T2	2	N1	1	M0	0	Stage II	2	G2	2	Alive	245	0.768579	0
TCGA-CD-8527	FEMALE	0	72	1	T2	2	N1	1	M0	0	Stage II	2	G2	2	Dead	218	1.72859	1
TCGA-D7-6527	MALE	1	62	1	T2	2	N1	1	M0	0	Stage II	2	G2	2	Dead	312	1.60194	1
TCGA-CG-5718	FEMALE	0	78	1	T2b	2	N1	1	M0	0	Stage II	2	G2	2	Dead	1095	1.46232	1
TCGA-HU-A4GF	MALE	1	69	1	T3	3	N0	0	M0	0	Stage IIA	2	G2	2	Alive	785	2.08794	1
TCGA-CD-A486	MALE	1	68	1	T3	3	N0	0	M0	0	Stage IIA	2	G2	2	Dead	192	3.27202	1
TCGA-F1-A72C	MALE	1	68	1	T3	3	N0	0	M0	0	Stage IIA	2	G2	2	Alive	346	0.979628	0
TCGA-CD-A48A	MALE	1	57	0	T3	3	N0	0	M0	0	Stage IIA	2	G2	2	Alive	378	1.69691	1
TCGA-BR-7715	MALE	1	65	1	T3	3	N0	0	M0	0	Stage IIA	2	G2	2	Alive	1023	3.68105	1
TCGA-VQ-AA6G	MALE	1	68	1	T3	3	N0	0	M0	0	Stage IIA	2	G2	2	Dead	792	0.531703	0
TCGA-CD-A4MH	FEMALE	0	86	1	T3	3	N0	0	M0	0	Stage IIA	2	G2	2	Alive	371	2.51771	1
TCGA-HU-8604	FEMALE	0	82	1	T3	3	N0	0	M0	0	Stage IIA	2	G2	2	Alive	694	0.98649	0
TCGA-BR-6801	MALE	1	70	1	T3	3	N0	0	M0	0	Stage IIA	2	G2	2	Alive	1223	1.35485	1
TCGA-BR-A4J6	FEMALE	0	69	1	T3	3	N0	0	M0	0	Stage IIA	2	G2	2	Alive	20	0.744181	0
TCGA-HU-A4GP	FEMALE	0	62	1	T2	2	N1	1	M0	0	Stage IIA	2	G2	2	Alive	273	0.636291	0
TCGA-IN-A6RN	FEMALE	0	72	1	T1b	1	N2	2	M0	0	Stage IIA	2	G2	2	Alive	594	0.854353	0
TCGA-BR-8081	FEMALE	0	71	1	T4a	4	N0	0	M0	0	Stage IIB	2	G2	2	Alive	981	0.787266	0
TCGA-VQ-A8P8	FEMALE	0	72	1	T4a	4	N0	0	M0	0	Stage IIB	2	G2	2	Alive	942	0.849686	0
TCGA-BR-6565	MALE	1	67	1	T4a	4	N0	0	M0	0	Stage IIB	2	G2	2	Dead	279	2.22644	1
TCGA-IN-8462	MALE	1	80	1	T2	2	N1	1	M0	0	Stage IIB	2	G2	2	Alive	572	1.0397	0
TCGA-BR-6456	FEMALE	0	74	1	T3	3	N1	1	M0	0	Stage IIB	2	G2	2	Dead	526	1.7859	1
TCGA-VQ-AA6F	MALE	1	57	0	T3	3	N1	1	M0	0	Stage IIB	2	G2	2	Alive	1646	0.636103	0
TCGA-BR-7901	MALE	1	74	1	T3	3	N1	1	M0	0	Stage IIB	2	G2	2	Dead	105	1.61289	1
TCGA-BR-7716	FEMALE	0	62	1	T3	3	N1	1	M0	0	Stage IIB	2	G2	2	Alive	1210	2.01625	1
TCGA-FP-7829	MALE	1	69	1	T3	3	N1	1	M0	0	Stage IIB	2	G2	2	Alive	594	1.34712	1
TCGA-D7-8572	MALE	1	57	0	T2	2	N2	2	M0	0	Stage IIB	2	G2	2	Alive	511	2.50992	1
TCGA-D7-8579	FEMALE	0	66	1	T2	2	N2	2	M0	0	Stage IIB	2	G2	2	Alive	636	0.879068	0
TCGA-D7-6815	FEMALE	0	70	1	T2	2	N2	2	M0	0	Stage IIB	2	G2	2	Alive	486	1.36068	1
TCGA-HU-A4G3	MALE	1	54	0	T2	2	N2	2	M0	0	Stage IIB	2	G2	2	Alive	170	0.651522	0
TCGA-BR-4280	FEMALE	0	78	1	T2b	2	N1	1	M0	0	Stage III	3	G2	2	Dead	201	0.762907	0
TCGA-VQ-A91Z	FEMALE	0	67	1	T3	3	N1	1	M0	0	Stage IIIA	3	G2	2	Alive	1690	2.15959	1
TCGA-VQ-A91K	MALE	1	69	1	T3	3	N1	1	M0	0	Stage IIIA	3	G2	2	Alive	1862	1.14195	0
TCGA-VQ-A91U	MALE	1	78	1	T3	3	N1	1	M0	0	Stage IIIA	3	G2	2	Dead	52	1.582	1
TCGA-RD-A8N5	MALE	1	78	1	T3	3	N1	1	M0	0	Stage IIIA	3	G2	2	Dead	1747	0.538512	0
TCGA-VQ-A8P3	MALE	1	72	1	T4	4	N1	1	M0	0	Stage IIIA	3	G2	2	Alive	1132	1.09193	0
TCGA-VQ-A8P2	MALE	1	68	1	T4a	4	N1	1	M0	0	Stage IIIA	3	G2	2	Alive	1160	2.067	1
TCGA-BR-8484	MALE	1	61	1	T4a	4	N1	1	M0	0	Stage IIIA	3	G2	2	Dead	766	1.06408	0
TCGA-VQ-AA6D	FEMALE	0	52	0	T4a	4	N1	1	M0	0	Stage IIIA	3	G2	2	Alive	521	2.4976	1
TCGA-BR-8373	FEMALE	0	65	1	T4a	4	N1	1	M0	0	Stage IIIA	3	G2	2	Alive	450	2.32292	1
TCGA-CG-4441	MALE	1	83	1	T2	2	N2	2	M0	0	Stage IIIA	3	G2	2	Dead	426	1.81976	1
TCGA-HU-A4HD	MALE	1	73	1	T3	3	N2	2	M0	0	Stage IIIA	3	G2	2	Alive	1016	2.68805	1
TCGA-D7-A74A	FEMALE	0	61	1	T3	3	N2	2	M0	0	Stage IIIA	3	G2	2	Alive	607	1.53909	1
TCGA-HU-8249	MALE	1	76	1	T3	3	N2	2	M0	0	Stage IIIA	3	G2	2	Alive	881	1.57796	1
TCGA-HU-A4H6	FEMALE	0	72	1	T3	3	N2	2	M0	0	Stage IIIA	3	G2	2	Alive	644	1.43556	1
TCGA-VQ-AA69	MALE	1	35	0	T3	3	N2	2	M0	0	Stage IIIA	3	G2	2	Alive	864	2.07383	1
TCGA-BR-8483	MALE	1	59	0	T3	3	N2	2	M0	0	Stage IIIA	3	G2	2	Alive	164	2.8748	1
TCGA-R5-A7ZE	FEMALE	0	66	1	T3	3	N2	2	M0	0	Stage IIIA	3	G2	2	Dead	554	2.09954	1
TCGA-VQ-A925	MALE	1	66	1	T3	3	N2	2	M0	0	Stage IIIA	3	G2	2	Dead	138	1.56139	1
TCGA-VQ-A8DU	MALE	1	63	1	T3	3	N2	2	M0	0	Stage IIIA	3	G2	2	Dead	166	3.16009	1
TCGA-D7-6526	FEMALE	0	67	1	T3	3	N2	2	M0	0	Stage IIIA	3	G2	2	Alive	523	1.79059	1
TCGA-VQ-A91V	MALE	1	58	0	T3	3	N2	2	M0	0	Stage IIIA	3	G2	2	Alive	1297	0.750719	0
TCGA-SW-A7EB	MALE	1	45	0	T3	3	N2	2	M0	0	Stage IIIA	3	G2	2	Alive	176	3.85406	1
TCGA-D7-5577	FEMALE	0	53	0	T2	2	N3	3	M0	0	Stage IIIA	3	G2	2	Dead	782	1.51026	1
TCGA-BR-8077	FEMALE	0	58	0	T4b	4	N1	1	M0	0	Stage IIIB	3	G2	2	Alive	21	1.2265	0
TCGA-VQ-AA64	MALE	1	68	1	T3	3	N2	2	M0	0	Stage IIIB	3	G2	2	Dead	560	1.71134	1
TCGA-VQ-A8E2	MALE	1	57	0	T3	3	N2	2	M0	0	Stage IIIB	3	G2	2	Alive	1319	3.81043	1
TCGA-VQ-A8PH	MALE	1	62	1	T3	3	N3	3	M0	0	Stage IIIB	3	G2	2	Dead	389	3.69746	1
TCGA-BR-A4QL	FEMALE	0	75	1	T3	3	N3a	3	M0	0	Stage IIIB	3	G2	2	Dead	491	0.964273	0
TCGA-VQ-A8PK	MALE	1	58	0	T3	3	N3a	3	M0	0	Stage IIIB	3	G2	2	Dead	543	1.61513	1
TCGA-BR-8690	FEMALE	0	54	0	T3	3	N3a	3	M0	0	Stage IIIB	3	G2	2	Alive	325	1.9587	1
TCGA-HU-A4H2	FEMALE	0	58	0	T3	3	N3b	3	M0	0	Stage IIIB	3	G2	2	Alive	394	1.72222	1
TCGA-HU-A4GQ	MALE	1	71	1	T4b	4	N2	2	M0	0	Stage IIIC	3	G2	2	Dead	3	1.01513	0
TCGA-VQ-A91D	MALE	1	70	1	T4b	4	N2	2	M0	0	Stage IIIC	3	G2	2	Dead	356	0.168171	0
TCGA-VQ-A8PD	MALE	1	69	1	T4a	4	N3	3	M0	0	Stage IIIC	3	G2	2	Dead	496	1.36358	1
TCGA-VQ-AA68	FEMALE	0	52	0	T4a	4	N3	3	M0	0	Stage IIIC	3	G2	2	Alive	1328	1.20211	0
TCGA-VQ-A94O	MALE	1	74	1	T4a	4	N3	3	M0	0	Stage IIIC	3	G2	2	Dead	640	4.15479	1
TCGA-VQ-AA6A	MALE	1	56	0	T4	4	N3a	3	M0	0	Stage IIIC	3	G2	2	Alive	1184	1.71891	1
TCGA-BR-7717	MALE	1	63	1	T4	4	N1	1	M0	0	Stage IV	4	G2	2	Dead	552	1.7038	1
TCGA-VQ-A8PP	MALE	1	76	1	T4	4	N1	1	M0	0	Stage IV	4	G2	2	Dead	712	0.934419	0
TCGA-VQ-A922	MALE	1	70	1	T4	4	N1	1	M0	0	Stage IV	4	G2	2	Dead	275	2.97036	1
TCGA-CG-5732	MALE	1	66	1	T2	2	N3	3	M0	0	Stage IV	4	G2	2	Dead	2100	1.02414	0
TCGA-VQ-A928	MALE	1	49	0	T3	3	N3	3	M0	0	Stage IV	4	G2	2	Dead	174	2.56549	1
TCGA-VQ-A91N	FEMALE	0	59	0	T4	4	N3	3	M0	0	Stage IV	4	G2	2	Dead	570	1.68332	1
TCGA-CD-8529	MALE	1	65	1	T4	4	N0	0	M1	1	Stage IV	4	G2	2	Alive	374	1.24193	0
TCGA-R5-A7O7	MALE	1	51	0	T3	3	N1	1	M1	1	Stage IV	4	G2	2	Alive	1389	1.65923	1
TCGA-VQ-A8E7	MALE	1	59	0	T3	3	N1	1	M1	1	Stage IV	4	G2	2	Alive	1138	1.12644	0
TCGA-VQ-A8PQ	FEMALE	0	50	0	T4	4	N1	1	M1	1	Stage IV	4	G2	2	Dead	476	0.758964	0
TCGA-CG-4460	FEMALE	0	66	1	T4	4	N1	1	M1	1	Stage IV	4	G2	2	Dead	669	1.90198	1
TCGA-R5-A7ZF	FEMALE	0	65	1	T4a	4	N1	1	M1	1	Stage IV	4	G2	2	Dead	259	1.24217	1
TCGA-CG-5716	MALE	1	86	1	T4a	4	N2	2	M1	1	Stage IV	4	G2	2	Alive	0	0.67776	0
TCGA-BR-8680	MALE	1	45	0	T4b	4	N2	2	M1	1	Stage IV	4	G2	2	Alive	972	2.04847	1
TCGA-IN-A6RJ	MALE	1	64	1	T1b	1	N0	0	M0	0	Stage IA	1	G3	3	Alive	379	0.539098	0
TCGA-RD-A8N2	FEMALE	0	59	0	T2	2	N0	0	M0	0	Stage IB	1	G3	3	Alive	3540	0.326145	0
TCGA-CG-4442	MALE	1	85	1	T2	2	N0	0	M0	0	Stage IB	1	G3	3	Alive	0	1.27553	1
TCGA-BR-7707	FEMALE	0	69	1	T2	2	N0	0	M0	0	Stage IB	1	G3	3	Alive	1090	0.771973	0
TCGA-RD-A7BW	FEMALE	0	68	1	T2	2	N0	0	M0	0	Stage IB	1	G3	3	Dead	156	0.655453	0
TCGA-CG-5720	MALE	1	71	1	T2	2	N0	0	M0	0	Stage IB	1	G3	3	Dead	30	0.612711	0
TCGA-BR-8368	FEMALE	0	84	1	T2	2	N0	0	M0	0	Stage IB	1	G3	3	Alive	131	1.8105	1
TCGA-D7-A6F0	FEMALE	0	79	1	T2	2	N0	0	M0	0	Stage IB	1	G3	3	Alive	678	4.82324	1
TCGA-CG-5725	MALE	1	72	1	T2	2	N0	0	M0	0	Stage IB	1	G3	3	Dead	457	4.39403	1
TCGA-D7-6522	MALE	1	58	0	T2	2	N0	0	M0	0	Stage IB	1	G3	3	Alive	566	0.429268	0
TCGA-F1-6874	MALE	1	79	1	T2	2	N0	0	M0	0	Stage IB	1	G3	3	Alive	440	0.311205	0
TCGA-B7-5818	MALE	1	62	1	T2	2	N0	0	M0	0	Stage IB	1	G3	3	Alive	356	1.04921	0
TCGA-D7-A6F2	MALE	1	62	1	T2	2	N0	0	M0	0	Stage IB	1	G3	3	Alive	476	1.47783	1
TCGA-RD-A7C1	MALE	1	82	1	T2	2	N0	0	M0	0	Stage IB	1	G3	3	Dead	507	1.80486	1
TCGA-CG-4477	FEMALE	0	58	0	T2a	2	N0	0	M0	0	Stage IB	1	G3	3	Alive	942	1.24768	1
TCGA-FP-8209	MALE	1	49	0	T2a	2	N0	0	M0	0	Stage IB	1	G3	3	Dead	1811	0.539592	0
TCGA-KB-A6F7	FEMALE	0	54	0	T1	1	N1	1	M0	0	Stage IB	1	G3	3	Alive	1935	2.88103	1
TCGA-CD-8533	MALE	1	48	0	T3	3	N0	0	M0	0	Stage II	2	G3	3	Alive	468	3.97738	1
TCGA-CD-8524	FEMALE	0	61	1	T3	3	N0	0	M0	0	Stage II	2	G3	3	Alive	388	1.3885	1
TCGA-CD-8530	MALE	1	51	0	T3	3	N0	0	M0	0	Stage II	2	G3	3	Alive	377	1.79111	1
TCGA-BR-7704	FEMALE	0	69	1	T3	3	N0	0	M0	0	Stage II	2	G3	3	Alive	1072	2.61061	1
TCGA-CD-8534	MALE	1	41	0	T3	3	N0	0	M0	0	Stage II	2	G3	3	Alive	367	1.21979	0
TCGA-CD-5813	MALE	1	60	1	T3	3	N0	0	M0	0	Stage II	2	G3	3	Dead	377	1.26528	1
TCGA-CD-5803	FEMALE	0	78	1	T3	3	N0	0	M0	0	Stage II	2	G3	3	Dead	341	0.917766	0
TCGA-BR-8286	MALE	1	49	0	T3	3	N0	0	M0	0	Stage II	2	G3	3	Alive	895	1.45445	1
TCGA-RD-A8N9	FEMALE	0	63	1	T2	2	N1	1	M0	0	Stage II	2	G3	3	Alive	1083	1.67245	1
TCGA-D7-6524	MALE	1	53	0	T2	2	N1	1	M0	0	Stage II	2	G3	3	Alive	543	1.01083	0
TCGA-CG-5723	MALE	1	83	1	T2	2	N1	1	M0	0	Stage II	2	G3	3	Alive	2496	1.13059	0
TCGA-CD-5799	MALE	1	45	0	T2	2	N1	1	M0	0	Stage II	2	G3	3	Alive	396	0.813178	0
TCGA-BR-4279	MALE	1	43	0	T2a	2	N1	1	M0	0	Stage II	2	G3	3	Dead	291	0.338686	0
TCGA-CG-4305	MALE	1	69	1	T2a	2	N1	1	M0	0	Stage II	2	G3	3	Alive	485	1.81892	1
TCGA-CG-5717	MALE	1	58	0	T2b	2	N1	1	M0	0	Stage II	2	G3	3	Dead	212	0.659772	0
TCGA-KB-A93J	MALE	1	78	1	T2b	2	N1	1	M0	0	Stage II	2	G3	3	Alive	1124	1.23323	0
TCGA-D7-8573	MALE	1	57	0	T3	3	N0	0	M0	0	Stage IIA	2	G3	3	Alive	593	1.90189	1
TCGA-HU-A4GT	FEMALE	0	71	1	T3	3	N0	0	M0	0	Stage IIA	2	G3	3	Alive	198	0.782224	0
TCGA-BR-8487	FEMALE	0	64	1	T3	3	N0	0	M0	0	Stage IIA	2	G3	3	Alive	34	0.258964	0
TCGA-BR-6454	MALE	1	58	0	T3	3	N0	0	M0	0	Stage IIA	2	G3	3	Alive	0	0.852728	0
TCGA-MX-A663	MALE	1	66	1	T3	3	N0	0	M0	0	Stage IIA	2	G3	3	Dead	300	3.43553	1
TCGA-BR-A44T	FEMALE	0	53	0	T3	3	N0	0	M0	0	Stage IIA	2	G3	3	Alive	1038	0.651481	0
TCGA-BR-6803	FEMALE	0	54	0	T3	3	N0	0	M0	0	Stage IIA	2	G3	3	Alive	949	0.84549	0
TCGA-BR-6707	MALE	1	75	1	T3	3	N0	0	M0	0	Stage IIA	2	G3	3	Dead	605	1.87011	1
TCGA-VQ-A8P5	MALE	1	67	1	T3	3	N0	0	M0	0	Stage IIA	2	G3	3	Dead	235	1.44515	1
TCGA-BR-6852	FEMALE	0	64	1	T3	3	N0	0	M0	0	Stage IIA	2	G3	3	Alive	1367	1.32558	1
TCGA-BR-A4J9	MALE	1	55	0	T3	3	N0	0	M0	0	Stage IIA	2	G3	3	Alive	14	0.337673	0
TCGA-BR-6452	FEMALE	0	78	1	T3	3	N0	0	M0	0	Stage IIA	2	G3	3	Alive	1055	1.43793	1
TCGA-BR-6457	MALE	1	69	1	T3	3	N0	0	M0	0	Stage IIA	2	G3	3	Alive	416	0.957685	0
TCGA-BR-8366	FEMALE	0	80	1	T3	3	N0	0	M0	0	Stage IIA	2	G3	3	Alive	29	1.04585	0
TCGA-BR-8365	FEMALE	0	70	1	T3	3	N0	0	M0	0	Stage IIA	2	G3	3	Dead	533	0.655814	0
TCGA-IN-AB1X	FEMALE	0	78	1	T3	3	N0	0	M0	0	Stage IIA	2	G3	3	Alive	411	0.875206	0
TCGA-VQ-A8E3	MALE	1	79	1	T3	3	N0	0	M0	0	Stage IIA	2	G3	3	Dead	661	1.34842	1
TCGA-CD-A4MG	MALE	1	76	1	T3	3	N0	0	M0	0	Stage IIA	2	G3	3	Dead	200	0.720285	0
TCGA-CD-A489	MALE	1	58	0	T3	3	N0	0	M0	0	Stage IIA	2	G3	3	Dead	344	0.647366	0
TCGA-BR-6566	FEMALE	0	64	1	T3	3	N0	0	M0	0	Stage IIA	2	G3	3	Alive	997	0.425219	0
TCGA-BR-6453	MALE	1	54	0	T2	2	N1	1	M0	0	Stage IIA	2	G3	3	Alive	485	0.620951	0
TCGA-VQ-A8PO	MALE	1	74	1	T4a	4	N0	0	M0	0	Stage IIB	2	G3	3	Dead	282	0.362632	0
TCGA-VQ-A94U	MALE	1	70	1	T4a	4	N0	0	M0	0	Stage IIB	2	G3	3	Alive	819	1.40871	1
TCGA-BR-8295	FEMALE	0	60	1	T4a	4	N0	0	M0	0	Stage IIB	2	G3	3	Dead	67	4.91521	1
TCGA-BR-8588	FEMALE	0	55	0	T4a	4	N0	0	M0	0	Stage IIB	2	G3	3	Alive	389	1.27689	1
TCGA-BR-8682	MALE	1	52	0	T4a	4	N0	0	M0	0	Stage IIB	2	G3	3	Alive	991	0.970774	0
TCGA-BR-7851	MALE	1	74	1	T4a	4	N0	0	M0	0	Stage IIB	2	G3	3	Dead	574	0.890353	0
TCGA-HU-8602	FEMALE	0	58	0	T4a	4	N0	0	M0	0	Stage IIB	2	G3	3	Alive	679	1.11847	0
TCGA-CG-4475	MALE	1	76	1	T3	3	N1	1	M0	0	Stage IIB	2	G3	3	Alive	699	1.34096	1
TCGA-HU-A4GD	MALE	1	56	0	T3	3	N1	1	M0	0	Stage IIB	2	G3	3	Alive	692	2.69491	1
TCGA-D7-A747	MALE	1	57	0	T3	3	N1	1	M0	0	Stage IIB	2	G3	3	Dead	255	0.611694	0
TCGA-BR-7722	MALE	1	62	1	T3	3	N1	1	M0	0	Stage IIB	2	G3	3	Dead	466	1.13116	0
TCGA-BR-6458	FEMALE	0	57	0	T3	3	N1	1	M0	0	Stage IIB	2	G3	3	Dead	588	1.59644	1
TCGA-BR-8381	MALE	1	51	0	T3	3	N1	1	M0	0	Stage IIB	2	G3	3	Alive	224	1.31558	1
TCGA-D7-A4YX	MALE	1	63	1	T3	3	N1	1	M0	0	Stage IIB	2	G3	3	Alive	1108	1.34383	1
TCGA-HU-A4G8	FEMALE	0	71	1	T3	3	N1	1	M0	0	Stage IIB	2	G3	3	Alive	690	1.19697	0
TCGA-IN-7806	MALE	1	50	0	T3	3	N1	1	M0	0	Stage IIB	2	G3	3	Alive	1106	0.962366	0
TCGA-IN-A7NT	FEMALE	0	73	1	T3	3	N1	1	M0	0	Stage IIB	2	G3	3	Alive	323	4.23183	1
TCGA-HU-A4G2	MALE	1	45	0	T3	3	N1	1	M0	0	Stage IIB	2	G3	3	Alive	739	0.884439	0
TCGA-BR-6563	MALE	1	60	1	T3	3	N1	1	M0	0	Stage IIB	2	G3	3	Alive	1190	0.365809	0
TCGA-CD-A487	MALE	1	51	0	T3	3	N1	1	M0	0	Stage IIB	2	G3	3	Alive	374	2.43327	1
TCGA-BR-6455	MALE	1	59	0	T3	3	N1	1	M0	0	Stage IIB	2	G3	3	Dead	422	3.02639	1
TCGA-HU-A4GU	MALE	1	73	1	T3	3	N1	1	M0	0	Stage IIB	2	G3	3	Alive	200	1.75801	1
TCGA-CD-A48C	FEMALE	0	79	1	T3	3	N1	1	M0	0	Stage IIB	2	G3	3	Dead	353	1.27473	1
TCGA-HU-A4HB	MALE	1	68	1	T2	2	N2	2	M0	0	Stage IIB	2	G3	3	Dead	477	1.47924	1
TCGA-BR-8060	FEMALE	0	75	1	T2	2	N2	2	M0	0	Stage IIB	2	G3	3	Dead	348	2.28739	1
TCGA-HU-A4H4	FEMALE	0	53	0	T2	2	N2	2	M0	0	Stage IIB	2	G3	3	Alive	725	1.57755	1
TCGA-D7-A4Z0	FEMALE	0	60	1	T2	2	N2	2	M0	0	Stage IIB	2	G3	3	Alive	449	0.563175	0
TCGA-D7-A6EV	FEMALE	0	71	1	T2	2	N2	2	M0	0	Stage IIB	2	G3	3	Alive	342	2.0291	1
TCGA-IN-8663	MALE	1	68	1	T2	2	N2	2	M0	0	Stage IIB	2	G3	3	Dead	103	1.19815	0
TCGA-BR-8059	MALE	1	72	1	T4	4	N1	1	M0	0	Stage III	3	G3	3	Dead	439	1.04103	0
TCGA-CD-8528	FEMALE	0	43	0	T4	4	N0	0	M0	0	Stage IIIA	3	G3	3	Alive	375	0.555002	0
TCGA-BR-4361	FEMALE	0	66	1	T4	4	N0	0	M0	0	Stage IIIA	3	G3	3	Alive	0	0.89058	0
TCGA-CD-5801	MALE	1	69	1	T3	3	N1	1	M0	0	Stage IIIA	3	G3	3	Dead	401	0.926836	0
TCGA-VQ-A8PC	MALE	1	65	1	T3	3	N1	1	M0	0	Stage IIIA	3	G3	3	Dead	1407	1.5063	1
TCGA-CD-8526	FEMALE	0	73	1	T3	3	N1	1	M0	0	Stage IIIA	3	G3	3	Alive	381	4.25499	1
TCGA-RD-A8NB	FEMALE	0	80	1	T3	3	N1	1	M0	0	Stage IIIA	3	G3	3	Dead	513	1.07727	0
TCGA-CD-8531	FEMALE	0	66	1	T3	3	N1	1	M0	0	Stage IIIA	3	G3	3	Alive	383	0.664835	0
TCGA-CD-8525	FEMALE	0	82	1	T3	3	N1	1	M0	0	Stage IIIA	3	G3	3	Alive	383	2.78472	1
TCGA-RD-A7BS	MALE	1	46	0	T3	3	N1	1	M0	0	Stage IIIA	3	G3	3	Dead	336	0.959495	0
TCGA-FP-8210	MALE	1	48	0	T3	3	N1	1	M0	0	Stage IIIA	3	G3	3	Dead	153	0.902985	0
TCGA-CD-8535	MALE	1	59	0	T3	3	N1	1	M0	0	Stage IIIA	3	G3	3	Alive	390	2.73569	1
TCGA-CG-5734	MALE	1	68	1	T3	3	N1	1	M0	0	Stage IIIA	3	G3	3	Dead	243	0.448668	0
TCGA-BR-4253	FEMALE	0	80	1	T3	3	N1	1	M0	0	Stage IIIA	3	G3	3	Dead	124	1.36347	1
TCGA-MX-A5UG	MALE	1	78	1	T3	3	N1	1	M0	0	Stage IIIA	3	G3	3	Dead	113	0.894713	0
TCGA-RD-A8N4	FEMALE	0	58	0	T3	3	N1	1	M0	0	Stage IIIA	3	G3	3	Alive	2171	0.505534	0
TCGA-VQ-A923	MALE	1	90	1	T3	3	N1	1	M0	0	Stage IIIA	3	G3	3	Dead	0	1.71183	1
TCGA-HU-A4GY	FEMALE	0	76	1	T4	4	N1	1	M0	0	Stage IIIA	3	G3	3	Alive	8	0.801659	0
TCGA-BR-7959	MALE	1	59	0	T4a	4	N1	1	M0	0	Stage IIIA	3	G3	3	Alive	1010	1.6114	1
TCGA-VQ-A8PU	FEMALE	0	72	1	T4a	4	N1	1	M0	0	Stage IIIA	3	G3	3	Dead	832	1.1588	0
TCGA-BR-A4J5	MALE	1	56	0	T4a	4	N1	1	M0	0	Stage IIIA	3	G3	3	Alive	862	0.777045	0
TCGA-D7-6525	MALE	1	58	0	T2	2	N2	2	M0	0	Stage IIIA	3	G3	3	Dead	406	1.2376	0
TCGA-RD-A8N6	FEMALE	0	78	1	T2	2	N2	2	M0	0	Stage IIIA	3	G3	3	Dead	272	2.55441	1
TCGA-CG-4444	MALE	1	76	1	T2b	2	N2	2	M0	0	Stage IIIA	3	G3	3	Alive	1431	0.899475	0
TCGA-D7-6520	MALE	1	53	0	T2b	2	N2	2	M0	0	Stage IIIA	3	G3	3	Alive	573	3.833	1
TCGA-D7-8575	MALE	1	75	1	T3	3	N2	2	M0	0	Stage IIIA	3	G3	3	Dead	554	0.785352	0
TCGA-VQ-A8E0	MALE	1	68	1	T3	3	N2	2	M0	0	Stage IIIA	3	G3	3	Dead	562	1.26312	1
TCGA-D7-A6EX	FEMALE	0	72	1	T3	3	N2	2	M0	0	Stage IIIA	3	G3	3	Alive	344	0.764885	0
TCGA-BR-6564	FEMALE	0	46	0	T3	3	N2	2	M0	0	Stage IIIA	3	G3	3	Dead	794	0.463581	0
TCGA-D7-A6EZ	MALE	1	66	1	T3	3	N2	2	M0	0	Stage IIIA	3	G3	3	Alive	297	1.48555	1
TCGA-FP-A4BF	MALE	1	68	1	T3	3	N2	2	M0	0	Stage IIIA	3	G3	3	Dead	168	1.30339	1
TCGA-BR-6802	MALE	1	65	1	T3	3	N2	2	M0	0	Stage IIIA	3	G3	3	Alive	940	1.09811	0
TCGA-MX-A5UJ	FEMALE	0	86	1	T3	3	N2	2	M0	0	Stage IIIA	3	G3	3	Alive	600	1.48691	1
TCGA-D7-5578	MALE	1	80	1	T3	3	N2	2	M0	0	Stage IIIA	3	G3	3	Alive	385	1.25981	1
TCGA-D7-6818	MALE	1	53	0	T2	2	N3	3	M0	0	Stage IIIA	3	G3	3	Alive	321	1.00176	0
TCGA-D7-8574	MALE	1	72	1	T2	2	N3a	3	M0	0	Stage IIIA	3	G3	3	Alive	523	0.79467	0
TCGA-VQ-A91E	FEMALE	0	67	1	T4b	4	N0	0	M0	0	Stage IIIB	3	G3	3	Alive	664	1.49188	1
TCGA-BR-7958	MALE	1	60	1	T4b	4	N0	0	M0	0	Stage IIIB	3	G3	3	Alive	899	1.5246	1
TCGA-BR-8592	FEMALE	0	63	1	T4b	4	N1	1	M0	0	Stage IIIB	3	G3	3	Dead	191	0.786288	0
TCGA-BR-8686	MALE	1	69	1	T4b	4	N1	1	M0	0	Stage IIIB	3	G3	3	Dead	635	1.73072	1
TCGA-BR-8589	MALE	1	56	0	T4b	4	N1	1	M0	0	Stage IIIB	3	G3	3	Alive	825	1.69273	1
TCGA-RD-A8MV	MALE	1	56	0	T3	3	N2	2	M0	0	Stage IIIB	3	G3	3	Alive	3720	1.32778	1
TCGA-RD-A8MW	MALE	1	72	1	T3	3	N2	2	M0	0	Stage IIIB	3	G3	3	Dead	1153	1.57387	1
TCGA-VQ-A94T	MALE	1	73	1	T3	3	N2	2	M0	0	Stage IIIB	3	G3	3	Dead	342	1.52565	1
TCGA-RD-A8N0	FEMALE	0	53	0	T3	3	N2	2	M0	0	Stage IIIB	3	G3	3	Alive	1236	0.794907	0
TCGA-RD-A8N1	MALE	1	70	1	T3	3	N2	2	M0	0	Stage IIIB	3	G3	3	Alive	3519	1.56635	1
TCGA-VQ-A91X	MALE	1	74	1	T3	3	N2	2	M0	0	Stage IIIB	3	G3	3	Dead	289	2.42861	1
TCGA-R5-A805	MALE	1	71	1	T3	3	N2	2	M0	0	Stage IIIB	3	G3	3	Dead	281	0.750215	0
TCGA-BR-A4IV	MALE	1	47	0	T4a	4	N2	2	M0	0	Stage IIIB	3	G3	3	Dead	869	0.69489	0
TCGA-BR-8683	MALE	1	75	1	T4a	4	N2	2	M0	0	Stage IIIB	3	G3	3	Dead	300	1.13213	0
TCGA-BR-A4J4	MALE	1	39	0	T4a	4	N2	2	M0	0	Stage IIIB	3	G3	3	Alive	16	1.73813	1
TCGA-HU-A4GC	MALE	1	74	1	T4a	4	N2	2	M0	0	Stage IIIB	3	G3	3	Alive	99	1.73221	1
TCGA-BR-A4PF	MALE	1	72	1	T4a	4	N2	2	M0	0	Stage IIIB	3	G3	3	Alive	35	0.833846	0
TCGA-VQ-AA6J	MALE	1	75	1	T4a	4	N2	2	M0	0	Stage IIIB	3	G3	3	Alive	838	2.07697	1
TCGA-BR-8058	FEMALE	0	53	0	T4a	4	N2	2	M0	0	Stage IIIB	3	G3	3	Alive	1133	0.619397	0
TCGA-HU-8608	MALE	1	70	1	T4a	4	N2	2	M0	0	Stage IIIB	3	G3	3	Alive	641	1.51451	1
TCGA-IN-A7NU	MALE	1	69	1	T3	3	N3	3	M0	0	Stage IIIB	3	G3	3	Alive	356	0.405855	0
TCGA-D7-8570	MALE	1	44	0	T3	3	N3a	3	M0	0	Stage IIIB	3	G3	3	Alive	752	1.46296	1
TCGA-BR-8371	MALE	1	62	1	T3	3	N3a	3	M0	0	Stage IIIB	3	G3	3	Dead	359	0.49714	0
TCGA-D7-A4YU	MALE	1	73	1	T3	3	N3a	3	M0	0	Stage IIIB	3	G3	3	Alive	500	0.671171	0
TCGA-BR-6705	FEMALE	0	68	1	T3	3	N3a	3	M0	0	Stage IIIB	3	G3	3	Dead	779	1.94719	1
TCGA-BR-A4J8	FEMALE	0	71	1	T3	3	N3a	3	M0	0	Stage IIIB	3	G3	3	Alive	411	0.241913	0
TCGA-BR-8677	FEMALE	0	74	1	T3	3	N3a	3	M0	0	Stage IIIB	3	G3	3	Alive	813	1.14516	0
TCGA-BR-8369	FEMALE	0	76	1	T3	3	N3a	3	M0	0	Stage IIIB	3	G3	3	Alive	427	1.78105	1
TCGA-BR-7723	MALE	1	59	0	T3	3	N3a	3	M0	0	Stage IIIB	3	G3	3	Dead	874	4.25553	1
TCGA-VQ-A8DT	MALE	1	43	0	T3	3	N3a	3	M0	0	Stage IIIB	3	G3	3	Alive	1484	1.10386	0
TCGA-D7-A6EY	FEMALE	0	72	1	T3	3	N3a	3	M0	0	Stage IIIB	3	G3	3	Dead	348	1.20587	0
TCGA-BR-8676	MALE	1	59	0	T3	3	N3a	3	M0	0	Stage IIIB	3	G3	3	Alive	229	1.72438	1
TCGA-BR-8367	MALE	1	55	0	T3	3	N3a	3	M0	0	Stage IIIB	3	G3	3	Dead	801	1.09744	0
TCGA-BR-6709	FEMALE	0	57	0	T3	3	N3a	3	M0	0	Stage IIIB	3	G3	3	Dead	370	0.635031	0
TCGA-BR-A44U	MALE	1	70	1	T3	3	N3a	3	M0	0	Stage IIIB	3	G3	3	Dead	422	1.02909	0
TCGA-D7-8576	FEMALE	0	54	0	T3	3	N3a	3	M0	0	Stage IIIB	3	G3	3	Dead	446	2.21133	1
TCGA-VQ-A8PE	MALE	1	78	1	T3	3	N3a	3	M0	0	Stage IIIB	3	G3	3	Dead	675	4.07037	1
TCGA-F1-A448	MALE	1	70	1	T3	3	N3b	3	M0	0	Stage IIIB	3	G3	3	Alive	647	0.810186	0
TCGA-VQ-A8PF	MALE	1	76	1	T3	3	N3b	3	M0	0	Stage IIIB	3	G3	3	Dead	76	1.47377	1
TCGA-BR-8296	FEMALE	0	58	0	T4b	4	N2	2	M0	0	Stage IIIC	3	G3	3	Dead	474	1.35377	1
TCGA-HU-A4GX	FEMALE	0	70	1	T4b	4	N2	2	M0	0	Stage IIIC	3	G3	3	Alive	616	1.13237	0
TCGA-BR-8687	FEMALE	0	67	1	T4b	4	N2	2	M0	0	Stage IIIC	3	G3	3	Dead	250	0.587891	0
TCGA-BR-8590	MALE	1	62	1	T4b	4	N2	2	M0	0	Stage IIIC	3	G3	3	Dead	284	2.07048	1
TCGA-BR-8364	FEMALE	0	42	0	T4b	4	N2	2	M0	0	Stage IIIC	3	G3	3	Alive	675	0.756479	0
TCGA-BR-8384	MALE	1	69	1	T4b	4	N2	2	M0	0	Stage IIIC	3	G3	3	Alive	113	0.823831	0
TCGA-BR-8361	FEMALE	0	71	1	T4b	4	N2	2	M0	0	Stage IIIC	3	G3	3	Alive	946	0.688764	0
TCGA-B7-A5TI	MALE	1	52	0	T4	4	N3	3	M0	0	Stage IIIC	3	G3	3	Alive	595	0.730577	0
TCGA-BR-8080	FEMALE	0	72	1	T4	4	N3a	3	M0	0	Stage IIIC	3	G3	3	Dead	292	1.07082	0
TCGA-BR-8485	FEMALE	0	68	1	T4	4	N3a	3	M0	0	Stage IIIC	3	G3	3	Alive	280	4.11163	1
TCGA-HU-A4GJ	FEMALE	0	60	1	T4	4	N3a	3	M0	0	Stage IIIC	3	G3	3	Alive	650	0.833675	0
TCGA-BR-8284	FEMALE	0	72	1	T4a	4	N3a	3	M0	0	Stage IIIC	3	G3	3	Dead	245	0.369379	0
TCGA-BR-8380	MALE	1	55	0	T4a	4	N3a	3	M0	0	Stage IIIC	3	G3	3	Alive	21	0.960771	0
TCGA-BR-8591	MALE	1	79	1	T4a	4	N3a	3	M0	0	Stage IIIC	3	G3	3	Alive	856	1.1265	0
TCGA-HF-A5NB	FEMALE	0	75	1	T4a	4	N3a	3	M0	0	Stage IIIC	3	G3	3	Alive	928	1.05746	0
TCGA-VQ-AA6K	MALE	1	59	0	T4a	4	N3a	3	M0	0	Stage IIIC	3	G3	3	Dead	378	1.48488	1
TCGA-BR-A4CR	FEMALE	0	70	1	T4b	4	N3a	3	M0	0	Stage IIIC	3	G3	3	Alive	0	2.76592	1
TCGA-BR-8372	MALE	1	63	1	T4b	4	N3a	3	M0	0	Stage IIIC	3	G3	3	Alive	951	0.487297	0
TCGA-BR-8382	FEMALE	0	67	1	T4b	4	N3a	3	M0	0	Stage IIIC	3	G3	3	Dead	762	0.544811	0
TCGA-BR-A4CS	MALE	1	77	1	T4b	4	N3a	3	M0	0	Stage IIIC	3	G3	3	Dead	45	2.4953	1
TCGA-CG-4476	MALE	1	69	1	T4b	4	N3a	3	M0	0	Stage IIIC	3	G3	3	Alive	0	0.648915	0
TCGA-VQ-A91Y	MALE	1	67	1	T4a	4	N3b	3	M0	0	Stage IIIC	3	G3	3	Dead	296	2.04805	1
TCGA-HU-A4H0	MALE	1	72	1	T4a	4	N3b	3	M0	0	Stage IIIC	3	G3	3	Alive	64	1.96866	1
TCGA-HU-A4H3	FEMALE	0	56	0	T4a	4	N3b	3	M0	0	Stage IIIC	3	G3	3	Alive	882	1.13121	0
TCGA-CG-5721	MALE	1	58	0	T4	4	N1	1	M0	0	Stage IV	4	G3	3	Alive	183	0.349932	0
TCGA-CG-4438	MALE	1	56	0	T4	4	N2	2	M0	0	Stage IV	4	G3	3	Alive	1645	2.34121	1
TCGA-BR-4368	FEMALE	0	78	1	T4	4	N2	2	M0	0	Stage IV	4	G3	3	Alive	0	0.574202	0
TCGA-CG-4469	MALE	1	70	1	T3	3	N3	3	M0	0	Stage IV	4	G3	3	Dead	215	1.54034	1
TCGA-RD-A7BT	MALE	1	66	1	T3	3	N3	3	M0	0	Stage IV	4	G3	3	Dead	262	2.35706	1
TCGA-VQ-A91Q	MALE	1	61	1	T3	3	N3	3	M0	0	Stage IV	4	G3	3	Dead	633	1.17433	0
TCGA-VQ-A8PM	MALE	1	56	0	T4	4	N3	3	M0	0	Stage IV	4	G3	3	Dead	57	1.37906	1
TCGA-R5-A7ZI	FEMALE	0	44	0	T4	4	N1	1	M1	1	Stage IV	4	G3	3	Alive	2267	0.861563	0
TCGA-CG-4301	FEMALE	0	75	1	T4	4	N1	1	M1	1	Stage IV	4	G3	3	Alive	92	0.98089	0
TCGA-CG-4306	MALE	1	90	1	T3	3	N2	2	M1	1	Stage IV	4	G3	3	Dead	1	0.93166	0
TCGA-CG-5722	FEMALE	0	67	1	T3	3	N2	2	M1	1	Stage IV	4	G3	3	Alive	30	1.05538	0
TCGA-IN-A7NR	FEMALE	0	64	1	T3	3	N3	3	M1	1	Stage IV	4	G3	3	Alive	198	1.08187	0
TCGA-CG-4440	FEMALE	0	68	1	T3	3	N3	3	M1	1	Stage IV	4	G3	3	Dead	122	0.829516	0
TCGA-CG-4462	FEMALE	0	72	1	T3	3	N3	3	M1	1	Stage IV	4	G3	3	Dead	0	0.826257	0
TCGA-CG-5724	MALE	1	59	0	T3	3	N3	3	M1	1	Stage IV	4	G3	3	Dead	366	1.13492	0
TCGA-VQ-A8DZ	MALE	1	70	1	T4	4	N3	3	M1	1	Stage IV	4	G3	3	Dead	396	2.42799	1
TCGA-CG-4465	FEMALE	0	69	1	T4	4	N3	3	M1	1	Stage IV	4	G3	3	Dead	274	0.500061	0
TCGA-D7-A748	FEMALE	0	41	0	T4a	4	N3	3	M1	1	Stage IV	4	G3	3	Dead	132	0.683361	0

## Sheet: NDRG1
Ensembl_ID	sex	sex-TJ	age	age-TJ	T	T-TJ	N	N-TJ	M	M-TJ	stage	stage-TJ	grade	grade-TJ	EVENT	OS	NDRG1	NDRG1
TCGA-HU-8244	FEMALE	0	77	1	T1a	1	N0	0	M0	0	Stage IA	1	G1	1	Alive	742	5.54728	1	4.8318
TCGA-KB-A93G	MALE	1	68	1	T2	2	N0	0	M0	0	Stage IB	1	G1	1	Alive	613	5.42035	1
TCGA-CD-5800	FEMALE	0	51	0	T3	3	N0	0	M0	0	Stage II	2	G1	1	Alive	400	5.66709	1
TCGA-KB-A93H	FEMALE	0	79	1	T3	3	N1	1	M0	0	Stage IIB	2	G1	1	Alive	1145	2.74962	0
TCGA-VQ-A927	MALE	1	81	1	T3	3	N3	3	M0	0	Stage IIIB	3	G1	1	Dead	200	4.8318	0
TCGA-VQ-A91A	MALE	1	67	1	T3	3	N3a	3	M0	0	Stage IIIB	3	G1	1	Alive	1200	5.61906	1
TCGA-CG-5719	FEMALE	0	54	0	T4	4	N0	0	M1	1	Stage IV	4	G1	1	Alive	31	4.59731	0
TCGA-IN-A6RI	MALE	1	45	0	T1b	1	N0	0	M0	0	Stage I	1	G2	2	Alive	559	4.74936	0
TCGA-CG-5726	MALE	1	73	1	T1	1	N0	0	M0	0	Stage IA	1	G2	2	Dead	881	6.24902	1
TCGA-VQ-A8PX	MALE	1	51	0	T1	1	N0	0	M0	0	Stage IA	1	G2	2	Alive	1964	5.19007	1
TCGA-CG-4443	MALE	1	68	1	T1	1	N0	0	M0	0	Stage IA	1	G2	2	Alive	912	3.85871	0
TCGA-HU-A4G9	FEMALE	0	67	1	T1a	1	N0	0	M0	0	Stage IA	1	G2	2	Alive	736	6.1145	1
TCGA-IN-A6RS	MALE	1	76	1	T1b	1	N0	0	M0	0	Stage IA	1	G2	2	Alive	383	4.51726	0
TCGA-HU-A4GH	MALE	1	75	1	T1b	1	N0	0	M0	0	Stage IA	1	G2	2	Alive	358	4.45857	0
TCGA-BR-8486	FEMALE	0	90	1	T1b	1	N0	0	M0	0	Stage IA	1	G2	2	Alive	0	4.64974	0
TCGA-IN-AB1V	MALE	1	63	1	T1b	1	N0	0	M0	0	Stage IA	1	G2	2	Alive	479	6.51103	1
TCGA-HU-8610	MALE	1	75	1	T1b	1	N0	0	M0	0	Stage IA	1	G2	2	Alive	23	5.03094	1
TCGA-F1-6875	MALE	1	79	1	T2	2	N0	0	M0	0	Stage IA	1	G2	2	Dead	2197	3.33531	0
TCGA-BR-8679	FEMALE	0	63	1	T2	2	N0	0	M0	0	Stage IB	1	G2	2	Alive	0	4.28406	0
TCGA-D7-8578	MALE	1	72	1	T2	2	N0	0	M0	0	Stage IB	1	G2	2	Alive	643	5.28344	1
TCGA-D7-6822	MALE	1	77	1	T2	2	N0	0	M0	0	Stage IB	1	G2	2	Alive	375	4.36685	0
TCGA-VQ-A8DV	MALE	1	48	0	T2	2	N0	0	M0	0	Stage IB	1	G2	2	Dead	403	4.21535	0
TCGA-CG-4436	MALE	1	57	0	T2	2	N0	0	M0	0	Stage IB	1	G2	2	Alive	243	3.45277	0
TCGA-BR-8678	MALE	1	76	1	T2	2	N0	0	M0	0	Stage IB	1	G2	2	Alive	754	5.83264	1
TCGA-D7-6528	FEMALE	0	70	1	T2	2	N0	0	M0	0	Stage IB	1	G2	2	Alive	463	5.87375	1
TCGA-BR-6710	MALE	1	41	0	T2	2	N0	0	M0	0	Stage IB	1	G2	2	Alive	273	5.69972	1
TCGA-CG-4466	FEMALE	0	81	1	T2a	2	N0	0	M0	0	Stage IB	1	G2	2	Alive	577	6.03946	1
TCGA-BR-4267	MALE	1	51	0	T2a	2	N0	0	M0	0	Stage IB	1	G2	2	Dead	188	4.86501	1
TCGA-VQ-A92D	MALE	1	67	1	T2b	2	N0	0	M0	0	Stage IB	1	G2	2	Alive	2032	4.59272	0
TCGA-HU-A4H8	MALE	1	77	1	T1b	1	N1	1	M0	0	Stage IB	1	G2	2	Alive	270	5.8478	1
TCGA-VQ-A8PB	FEMALE	0	65	1	T3	3	N0	0	M0	0	Stage II	2	G2	2	Dead	1043	6.34063	1
TCGA-CD-8532	MALE	1	52	0	T3	3	N0	0	M0	0	Stage II	2	G2	2	Dead	354	5.50739	1
TCGA-VQ-A924	MALE	1	69	1	T3	3	N0	0	M0	0	Stage II	2	G2	2	Dead	1686	4.2157	0
TCGA-CD-5798	MALE	1	82	1	T3	3	N0	0	M0	0	Stage II	2	G2	2	Alive	408	4.31598	0
TCGA-CG-4437	MALE	1	83	1	T2	2	N1	1	M0	0	Stage II	2	G2	2	Alive	245	5.33283	1
TCGA-CD-8527	FEMALE	0	72	1	T2	2	N1	1	M0	0	Stage II	2	G2	2	Dead	218	5.02163	1
TCGA-D7-6527	MALE	1	62	1	T2	2	N1	1	M0	0	Stage II	2	G2	2	Dead	312	5.21429	1
TCGA-CG-5718	FEMALE	0	78	1	T2b	2	N1	1	M0	0	Stage II	2	G2	2	Dead	1095	5.49085	1
TCGA-HU-A4GF	MALE	1	69	1	T3	3	N0	0	M0	0	Stage IIA	2	G2	2	Alive	785	4.60233	0
TCGA-CD-A486	MALE	1	68	1	T3	3	N0	0	M0	0	Stage IIA	2	G2	2	Dead	192	5.90434	1
TCGA-F1-A72C	MALE	1	68	1	T3	3	N0	0	M0	0	Stage IIA	2	G2	2	Alive	346	4.09714	0
TCGA-CD-A48A	MALE	1	57	0	T3	3	N0	0	M0	0	Stage IIA	2	G2	2	Alive	378	3.93238	0
TCGA-BR-7715	MALE	1	65	1	T3	3	N0	0	M0	0	Stage IIA	2	G2	2	Alive	1023	3.38193	0
TCGA-VQ-AA6G	MALE	1	68	1	T3	3	N0	0	M0	0	Stage IIA	2	G2	2	Dead	792	4.63298	0
TCGA-CD-A4MH	FEMALE	0	86	1	T3	3	N0	0	M0	0	Stage IIA	2	G2	2	Alive	371	4.49429	0
TCGA-HU-8604	FEMALE	0	82	1	T3	3	N0	0	M0	0	Stage IIA	2	G2	2	Alive	694	4.30709	0
TCGA-BR-6801	MALE	1	70	1	T3	3	N0	0	M0	0	Stage IIA	2	G2	2	Alive	1223	5.85161	1
TCGA-BR-A4J6	FEMALE	0	69	1	T3	3	N0	0	M0	0	Stage IIA	2	G2	2	Alive	20	3.7598	0
TCGA-HU-A4GP	FEMALE	0	62	1	T2	2	N1	1	M0	0	Stage IIA	2	G2	2	Alive	273	5.76287	1
TCGA-IN-A6RN	FEMALE	0	72	1	T1b	1	N2	2	M0	0	Stage IIA	2	G2	2	Alive	594	5.29647	1
TCGA-BR-8081	FEMALE	0	71	1	T4a	4	N0	0	M0	0	Stage IIB	2	G2	2	Alive	981	4.28757	0
TCGA-VQ-A8P8	FEMALE	0	72	1	T4a	4	N0	0	M0	0	Stage IIB	2	G2	2	Alive	942	5.09237	1
TCGA-BR-6565	MALE	1	67	1	T4a	4	N0	0	M0	0	Stage IIB	2	G2	2	Dead	279	5.28829	1
TCGA-IN-8462	MALE	1	80	1	T2	2	N1	1	M0	0	Stage IIB	2	G2	2	Alive	572	5.51212	1
TCGA-BR-6456	FEMALE	0	74	1	T3	3	N1	1	M0	0	Stage IIB	2	G2	2	Dead	526	4.86003	1
TCGA-VQ-AA6F	MALE	1	57	0	T3	3	N1	1	M0	0	Stage IIB	2	G2	2	Alive	1646	3.84624	0
TCGA-BR-7901	MALE	1	74	1	T3	3	N1	1	M0	0	Stage IIB	2	G2	2	Dead	105	5.54156	1
TCGA-BR-7716	FEMALE	0	62	1	T3	3	N1	1	M0	0	Stage IIB	2	G2	2	Alive	1210	5.70129	1
TCGA-FP-7829	MALE	1	69	1	T3	3	N1	1	M0	0	Stage IIB	2	G2	2	Alive	594	5.32931	1
TCGA-D7-8572	MALE	1	57	0	T2	2	N2	2	M0	0	Stage IIB	2	G2	2	Alive	511	5.20991	1
TCGA-D7-8579	FEMALE	0	66	1	T2	2	N2	2	M0	0	Stage IIB	2	G2	2	Alive	636	4.92413	1
TCGA-D7-6815	FEMALE	0	70	1	T2	2	N2	2	M0	0	Stage IIB	2	G2	2	Alive	486	6.30119	1
TCGA-HU-A4G3	MALE	1	54	0	T2	2	N2	2	M0	0	Stage IIB	2	G2	2	Alive	170	4.41495	0
TCGA-BR-4280	FEMALE	0	78	1	T2b	2	N1	1	M0	0	Stage III	3	G2	2	Dead	201	5.9719	1
TCGA-VQ-A91Z	FEMALE	0	67	1	T3	3	N1	1	M0	0	Stage IIIA	3	G2	2	Alive	1690	4.70459	0
TCGA-VQ-A91K	MALE	1	69	1	T3	3	N1	1	M0	0	Stage IIIA	3	G2	2	Alive	1862	4.05346	0
TCGA-VQ-A91U	MALE	1	78	1	T3	3	N1	1	M0	0	Stage IIIA	3	G2	2	Dead	52	5.69003	1
TCGA-RD-A8N5	MALE	1	78	1	T3	3	N1	1	M0	0	Stage IIIA	3	G2	2	Dead	1747	4.71775	0
TCGA-VQ-A8P3	MALE	1	72	1	T4	4	N1	1	M0	0	Stage IIIA	3	G2	2	Alive	1132	4.15742	0
TCGA-VQ-A8P2	MALE	1	68	1	T4a	4	N1	1	M0	0	Stage IIIA	3	G2	2	Alive	1160	5.41716	1
TCGA-BR-8484	MALE	1	61	1	T4a	4	N1	1	M0	0	Stage IIIA	3	G2	2	Dead	766	5.12589	1
TCGA-VQ-AA6D	FEMALE	0	52	0	T4a	4	N1	1	M0	0	Stage IIIA	3	G2	2	Alive	521	6.57447	1
TCGA-BR-8373	FEMALE	0	65	1	T4a	4	N1	1	M0	0	Stage IIIA	3	G2	2	Alive	450	5.25304	1
TCGA-CG-4441	MALE	1	83	1	T2	2	N2	2	M0	0	Stage IIIA	3	G2	2	Dead	426	6.55448	1
TCGA-HU-A4HD	MALE	1	73	1	T3	3	N2	2	M0	0	Stage IIIA	3	G2	2	Alive	1016	6.113	1
TCGA-D7-A74A	FEMALE	0	61	1	T3	3	N2	2	M0	0	Stage IIIA	3	G2	2	Alive	607	6.50511	1
TCGA-HU-8249	MALE	1	76	1	T3	3	N2	2	M0	0	Stage IIIA	3	G2	2	Alive	881	3.89719	0
TCGA-HU-A4H6	FEMALE	0	72	1	T3	3	N2	2	M0	0	Stage IIIA	3	G2	2	Alive	644	4.09329	0
TCGA-VQ-AA69	MALE	1	35	0	T3	3	N2	2	M0	0	Stage IIIA	3	G2	2	Alive	864	3.90589	0
TCGA-BR-8483	MALE	1	59	0	T3	3	N2	2	M0	0	Stage IIIA	3	G2	2	Alive	164	5.65553	1
TCGA-R5-A7ZE	FEMALE	0	66	1	T3	3	N2	2	M0	0	Stage IIIA	3	G2	2	Dead	554	5.38525	1
TCGA-VQ-A925	MALE	1	66	1	T3	3	N2	2	M0	0	Stage IIIA	3	G2	2	Dead	138	5.50228	1
TCGA-VQ-A8DU	MALE	1	63	1	T3	3	N2	2	M0	0	Stage IIIA	3	G2	2	Dead	166	3.62576	0
TCGA-D7-6526	FEMALE	0	67	1	T3	3	N2	2	M0	0	Stage IIIA	3	G2	2	Alive	523	5.26992	1
TCGA-VQ-A91V	MALE	1	58	0	T3	3	N2	2	M0	0	Stage IIIA	3	G2	2	Alive	1297	5.73168	1
TCGA-SW-A7EB	MALE	1	45	0	T3	3	N2	2	M0	0	Stage IIIA	3	G2	2	Alive	176	5.73366	1
TCGA-D7-5577	FEMALE	0	53	0	T2	2	N3	3	M0	0	Stage IIIA	3	G2	2	Dead	782	3.67365	0
TCGA-BR-8077	FEMALE	0	58	0	T4b	4	N1	1	M0	0	Stage IIIB	3	G2	2	Alive	21	4.9336	1
TCGA-VQ-AA64	MALE	1	68	1	T3	3	N2	2	M0	0	Stage IIIB	3	G2	2	Dead	560	3.73364	0
TCGA-VQ-A8E2	MALE	1	57	0	T3	3	N2	2	M0	0	Stage IIIB	3	G2	2	Alive	1319	4.02469	0
TCGA-VQ-A8PH	MALE	1	62	1	T3	3	N3	3	M0	0	Stage IIIB	3	G2	2	Dead	389	4.30372	0
TCGA-BR-A4QL	FEMALE	0	75	1	T3	3	N3a	3	M0	0	Stage IIIB	3	G2	2	Dead	491	4.35395	0
TCGA-VQ-A8PK	MALE	1	58	0	T3	3	N3a	3	M0	0	Stage IIIB	3	G2	2	Dead	543	5.17547	1
TCGA-BR-8690	FEMALE	0	54	0	T3	3	N3a	3	M0	0	Stage IIIB	3	G2	2	Alive	325	4.17134	0
TCGA-HU-A4H2	FEMALE	0	58	0	T3	3	N3b	3	M0	0	Stage IIIB	3	G2	2	Alive	394	4.51667	0
TCGA-HU-A4GQ	MALE	1	71	1	T4b	4	N2	2	M0	0	Stage IIIC	3	G2	2	Dead	3	3.41981	0
TCGA-VQ-A91D	MALE	1	70	1	T4b	4	N2	2	M0	0	Stage IIIC	3	G2	2	Dead	356	5.72206	1
TCGA-VQ-A8PD	MALE	1	69	1	T4a	4	N3	3	M0	0	Stage IIIC	3	G2	2	Dead	496	4.94577	1
TCGA-VQ-AA68	FEMALE	0	52	0	T4a	4	N3	3	M0	0	Stage IIIC	3	G2	2	Alive	1328	4.95681	1
TCGA-VQ-A94O	MALE	1	74	1	T4a	4	N3	3	M0	0	Stage IIIC	3	G2	2	Dead	640	6.25138	1
TCGA-VQ-AA6A	MALE	1	56	0	T4	4	N3a	3	M0	0	Stage IIIC	3	G2	2	Alive	1184	5.07415	1
TCGA-BR-7717	MALE	1	63	1	T4	4	N1	1	M0	0	Stage IV	4	G2	2	Dead	552	4.40844	0
TCGA-VQ-A8PP	MALE	1	76	1	T4	4	N1	1	M0	0	Stage IV	4	G2	2	Dead	712	4.31938	0
TCGA-VQ-A922	MALE	1	70	1	T4	4	N1	1	M0	0	Stage IV	4	G2	2	Dead	275	4.74337	0
TCGA-CG-5732	MALE	1	66	1	T2	2	N3	3	M0	0	Stage IV	4	G2	2	Dead	2100	5.34281	1
TCGA-VQ-A928	MALE	1	49	0	T3	3	N3	3	M0	0	Stage IV	4	G2	2	Dead	174	5.73904	1
TCGA-VQ-A91N	FEMALE	0	59	0	T4	4	N3	3	M0	0	Stage IV	4	G2	2	Dead	570	5.01066	1
TCGA-CD-8529	MALE	1	65	1	T4	4	N0	0	M1	1	Stage IV	4	G2	2	Alive	374	4.51164	0
TCGA-R5-A7O7	MALE	1	51	0	T3	3	N1	1	M1	1	Stage IV	4	G2	2	Alive	1389	4.30726	0
TCGA-VQ-A8E7	MALE	1	59	0	T3	3	N1	1	M1	1	Stage IV	4	G2	2	Alive	1138	5.13775	1
TCGA-VQ-A8PQ	FEMALE	0	50	0	T4	4	N1	1	M1	1	Stage IV	4	G2	2	Dead	476	4.4822	0
TCGA-CG-4460	FEMALE	0	66	1	T4	4	N1	1	M1	1	Stage IV	4	G2	2	Dead	669	5.54142	1
TCGA-R5-A7ZF	FEMALE	0	65	1	T4a	4	N1	1	M1	1	Stage IV	4	G2	2	Dead	259	4.24449	0
TCGA-CG-5716	MALE	1	86	1	T4a	4	N2	2	M1	1	Stage IV	4	G2	2	Alive	0	5.62379	1
TCGA-BR-8680	MALE	1	45	0	T4b	4	N2	2	M1	1	Stage IV	4	G2	2	Alive	972	5.41165	1
TCGA-IN-A6RJ	MALE	1	64	1	T1b	1	N0	0	M0	0	Stage IA	1	G3	3	Alive	379	7.0099	1
TCGA-RD-A8N2	FEMALE	0	59	0	T2	2	N0	0	M0	0	Stage IB	1	G3	3	Alive	3540	3.48338	0
TCGA-CG-4442	MALE	1	85	1	T2	2	N0	0	M0	0	Stage IB	1	G3	3	Alive	0	4.94793	1
TCGA-BR-7707	FEMALE	0	69	1	T2	2	N0	0	M0	0	Stage IB	1	G3	3	Alive	1090	4.78232	0
TCGA-RD-A7BW	FEMALE	0	68	1	T2	2	N0	0	M0	0	Stage IB	1	G3	3	Dead	156	3.9957	0
TCGA-CG-5720	MALE	1	71	1	T2	2	N0	0	M0	0	Stage IB	1	G3	3	Dead	30	5.71311	1
TCGA-BR-8368	FEMALE	0	84	1	T2	2	N0	0	M0	0	Stage IB	1	G3	3	Alive	131	5.11788	1
TCGA-D7-A6F0	FEMALE	0	79	1	T2	2	N0	0	M0	0	Stage IB	1	G3	3	Alive	678	5.28178	1
TCGA-CG-5725	MALE	1	72	1	T2	2	N0	0	M0	0	Stage IB	1	G3	3	Dead	457	6.90011	1
TCGA-D7-6522	MALE	1	58	0	T2	2	N0	0	M0	0	Stage IB	1	G3	3	Alive	566	5.26166	1
TCGA-F1-6874	MALE	1	79	1	T2	2	N0	0	M0	0	Stage IB	1	G3	3	Alive	440	5.15156	1
TCGA-B7-5818	MALE	1	62	1	T2	2	N0	0	M0	0	Stage IB	1	G3	3	Alive	356	5.03558	1
TCGA-D7-A6F2	MALE	1	62	1	T2	2	N0	0	M0	0	Stage IB	1	G3	3	Alive	476	6.45393	1
TCGA-RD-A7C1	MALE	1	82	1	T2	2	N0	0	M0	0	Stage IB	1	G3	3	Dead	507	3.95902	0
TCGA-CG-4477	FEMALE	0	58	0	T2a	2	N0	0	M0	0	Stage IB	1	G3	3	Alive	942	4.96148	1
TCGA-FP-8209	MALE	1	49	0	T2a	2	N0	0	M0	0	Stage IB	1	G3	3	Dead	1811	4.42802	0
TCGA-KB-A6F7	FEMALE	0	54	0	T1	1	N1	1	M0	0	Stage IB	1	G3	3	Alive	1935	5.66673	1
TCGA-CD-8533	MALE	1	48	0	T3	3	N0	0	M0	0	Stage II	2	G3	3	Alive	468	4.55301	0
TCGA-CD-8524	FEMALE	0	61	1	T3	3	N0	0	M0	0	Stage II	2	G3	3	Alive	388	4.32495	0
TCGA-CD-8530	MALE	1	51	0	T3	3	N0	0	M0	0	Stage II	2	G3	3	Alive	377	4.89629	1
TCGA-BR-7704	FEMALE	0	69	1	T3	3	N0	0	M0	0	Stage II	2	G3	3	Alive	1072	3.38432	0
TCGA-CD-8534	MALE	1	41	0	T3	3	N0	0	M0	0	Stage II	2	G3	3	Alive	367	5.09965	1
TCGA-CD-5813	MALE	1	60	1	T3	3	N0	0	M0	0	Stage II	2	G3	3	Dead	377	6.17524	1
TCGA-CD-5803	FEMALE	0	78	1	T3	3	N0	0	M0	0	Stage II	2	G3	3	Dead	341	4.95689	1
TCGA-BR-8286	MALE	1	49	0	T3	3	N0	0	M0	0	Stage II	2	G3	3	Alive	895	4.02773	0
TCGA-RD-A8N9	FEMALE	0	63	1	T2	2	N1	1	M0	0	Stage II	2	G3	3	Alive	1083	5.45366	1
TCGA-D7-6524	MALE	1	53	0	T2	2	N1	1	M0	0	Stage II	2	G3	3	Alive	543	5.58054	1
TCGA-CG-5723	MALE	1	83	1	T2	2	N1	1	M0	0	Stage II	2	G3	3	Alive	2496	4.17439	0
TCGA-CD-5799	MALE	1	45	0	T2	2	N1	1	M0	0	Stage II	2	G3	3	Alive	396	5.61962	1
TCGA-BR-4279	MALE	1	43	0	T2a	2	N1	1	M0	0	Stage II	2	G3	3	Dead	291	5.12085	1
TCGA-CG-4305	MALE	1	69	1	T2a	2	N1	1	M0	0	Stage II	2	G3	3	Alive	485	4.76885	0
TCGA-CG-5717	MALE	1	58	0	T2b	2	N1	1	M0	0	Stage II	2	G3	3	Dead	212	7.14274	1
TCGA-KB-A93J	MALE	1	78	1	T2b	2	N1	1	M0	0	Stage II	2	G3	3	Alive	1124	6.01631	1
TCGA-D7-8573	MALE	1	57	0	T3	3	N0	0	M0	0	Stage IIA	2	G3	3	Alive	593	2.98808	0
TCGA-HU-A4GT	FEMALE	0	71	1	T3	3	N0	0	M0	0	Stage IIA	2	G3	3	Alive	198	5.17917	1
TCGA-BR-8487	FEMALE	0	64	1	T3	3	N0	0	M0	0	Stage IIA	2	G3	3	Alive	34	3.9006	0
TCGA-BR-6454	MALE	1	58	0	T3	3	N0	0	M0	0	Stage IIA	2	G3	3	Alive	0	4.42171	0
TCGA-MX-A663	MALE	1	66	1	T3	3	N0	0	M0	0	Stage IIA	2	G3	3	Dead	300	5.53591	1
TCGA-BR-A44T	FEMALE	0	53	0	T3	3	N0	0	M0	0	Stage IIA	2	G3	3	Alive	1038	3.65584	0
TCGA-BR-6803	FEMALE	0	54	0	T3	3	N0	0	M0	0	Stage IIA	2	G3	3	Alive	949	5.52911	1
TCGA-BR-6707	MALE	1	75	1	T3	3	N0	0	M0	0	Stage IIA	2	G3	3	Dead	605	5.42111	1
TCGA-VQ-A8P5	MALE	1	67	1	T3	3	N0	0	M0	0	Stage IIA	2	G3	3	Dead	235	4.19301	0
TCGA-BR-6852	FEMALE	0	64	1	T3	3	N0	0	M0	0	Stage IIA	2	G3	3	Alive	1367	4.53013	0
TCGA-BR-A4J9	MALE	1	55	0	T3	3	N0	0	M0	0	Stage IIA	2	G3	3	Alive	14	3.80523	0
TCGA-BR-6452	FEMALE	0	78	1	T3	3	N0	0	M0	0	Stage IIA	2	G3	3	Alive	1055	7.04189	1
TCGA-BR-6457	MALE	1	69	1	T3	3	N0	0	M0	0	Stage IIA	2	G3	3	Alive	416	5.81337	1
TCGA-BR-8366	FEMALE	0	80	1	T3	3	N0	0	M0	0	Stage IIA	2	G3	3	Alive	29	4.14422	0
TCGA-BR-8365	FEMALE	0	70	1	T3	3	N0	0	M0	0	Stage IIA	2	G3	3	Dead	533	4.83088	0
TCGA-IN-AB1X	FEMALE	0	78	1	T3	3	N0	0	M0	0	Stage IIA	2	G3	3	Alive	411	5.74507	1
TCGA-VQ-A8E3	MALE	1	79	1	T3	3	N0	0	M0	0	Stage IIA	2	G3	3	Dead	661	2.67337	0
TCGA-CD-A4MG	MALE	1	76	1	T3	3	N0	0	M0	0	Stage IIA	2	G3	3	Dead	200	3.53265	0
TCGA-CD-A489	MALE	1	58	0	T3	3	N0	0	M0	0	Stage IIA	2	G3	3	Dead	344	3.43845	0
TCGA-BR-6566	FEMALE	0	64	1	T3	3	N0	0	M0	0	Stage IIA	2	G3	3	Alive	997	5.12071	1
TCGA-BR-6453	MALE	1	54	0	T2	2	N1	1	M0	0	Stage IIA	2	G3	3	Alive	485	6.16001	1
TCGA-VQ-A8PO	MALE	1	74	1	T4a	4	N0	0	M0	0	Stage IIB	2	G3	3	Dead	282	4.68311	0
TCGA-VQ-A94U	MALE	1	70	1	T4a	4	N0	0	M0	0	Stage IIB	2	G3	3	Alive	819	4.56733	0
TCGA-BR-8295	FEMALE	0	60	1	T4a	4	N0	0	M0	0	Stage IIB	2	G3	3	Dead	67	4.04419	0
TCGA-BR-8588	FEMALE	0	55	0	T4a	4	N0	0	M0	0	Stage IIB	2	G3	3	Alive	389	5.01565	1
TCGA-BR-8682	MALE	1	52	0	T4a	4	N0	0	M0	0	Stage IIB	2	G3	3	Alive	991	5.82304	1
TCGA-BR-7851	MALE	1	74	1	T4a	4	N0	0	M0	0	Stage IIB	2	G3	3	Dead	574	6.24358	1
TCGA-HU-8602	FEMALE	0	58	0	T4a	4	N0	0	M0	0	Stage IIB	2	G3	3	Alive	679	4.6238	0
TCGA-CG-4475	MALE	1	76	1	T3	3	N1	1	M0	0	Stage IIB	2	G3	3	Alive	699	5.22366	1
TCGA-HU-A4GD	MALE	1	56	0	T3	3	N1	1	M0	0	Stage IIB	2	G3	3	Alive	692	4.3649	0
TCGA-D7-A747	MALE	1	57	0	T3	3	N1	1	M0	0	Stage IIB	2	G3	3	Dead	255	3.78637	0
TCGA-BR-7722	MALE	1	62	1	T3	3	N1	1	M0	0	Stage IIB	2	G3	3	Dead	466	4.56562	0
TCGA-BR-6458	FEMALE	0	57	0	T3	3	N1	1	M0	0	Stage IIB	2	G3	3	Dead	588	4.44791	0
TCGA-BR-8381	MALE	1	51	0	T3	3	N1	1	M0	0	Stage IIB	2	G3	3	Alive	224	4.07081	0
TCGA-D7-A4YX	MALE	1	63	1	T3	3	N1	1	M0	0	Stage IIB	2	G3	3	Alive	1108	2.95689	0
TCGA-HU-A4G8	FEMALE	0	71	1	T3	3	N1	1	M0	0	Stage IIB	2	G3	3	Alive	690	4.81319	0
TCGA-IN-7806	MALE	1	50	0	T3	3	N1	1	M0	0	Stage IIB	2	G3	3	Alive	1106	5.63881	1
TCGA-IN-A7NT	FEMALE	0	73	1	T3	3	N1	1	M0	0	Stage IIB	2	G3	3	Alive	323	5.53404	1
TCGA-HU-A4G2	MALE	1	45	0	T3	3	N1	1	M0	0	Stage IIB	2	G3	3	Alive	739	4.2561	0
TCGA-BR-6563	MALE	1	60	1	T3	3	N1	1	M0	0	Stage IIB	2	G3	3	Alive	1190	4.73947	0
TCGA-CD-A487	MALE	1	51	0	T3	3	N1	1	M0	0	Stage IIB	2	G3	3	Alive	374	4.15899	0
TCGA-BR-6455	MALE	1	59	0	T3	3	N1	1	M0	0	Stage IIB	2	G3	3	Dead	422	4.04184	0
TCGA-HU-A4GU	MALE	1	73	1	T3	3	N1	1	M0	0	Stage IIB	2	G3	3	Alive	200	5.44868	1
TCGA-CD-A48C	FEMALE	0	79	1	T3	3	N1	1	M0	0	Stage IIB	2	G3	3	Dead	353	4.54821	0
TCGA-HU-A4HB	MALE	1	68	1	T2	2	N2	2	M0	0	Stage IIB	2	G3	3	Dead	477	5.24111	1
TCGA-BR-8060	FEMALE	0	75	1	T2	2	N2	2	M0	0	Stage IIB	2	G3	3	Dead	348	4.97784	1
TCGA-HU-A4H4	FEMALE	0	53	0	T2	2	N2	2	M0	0	Stage IIB	2	G3	3	Alive	725	3.57384	0
TCGA-D7-A4Z0	FEMALE	0	60	1	T2	2	N2	2	M0	0	Stage IIB	2	G3	3	Alive	449	4.83975	1
TCGA-D7-A6EV	FEMALE	0	71	1	T2	2	N2	2	M0	0	Stage IIB	2	G3	3	Alive	342	6.23657	1
TCGA-IN-8663	MALE	1	68	1	T2	2	N2	2	M0	0	Stage IIB	2	G3	3	Dead	103	5.54093	1
TCGA-BR-8059	MALE	1	72	1	T4	4	N1	1	M0	0	Stage III	3	G3	3	Dead	439	4.77236	0
TCGA-CD-8528	FEMALE	0	43	0	T4	4	N0	0	M0	0	Stage IIIA	3	G3	3	Alive	375	3.82565	0
TCGA-BR-4361	FEMALE	0	66	1	T4	4	N0	0	M0	0	Stage IIIA	3	G3	3	Alive	0	5.24395	1
TCGA-CD-5801	MALE	1	69	1	T3	3	N1	1	M0	0	Stage IIIA	3	G3	3	Dead	401	2.84606	0
TCGA-VQ-A8PC	MALE	1	65	1	T3	3	N1	1	M0	0	Stage IIIA	3	G3	3	Dead	1407	4.61749	0
TCGA-CD-8526	FEMALE	0	73	1	T3	3	N1	1	M0	0	Stage IIIA	3	G3	3	Alive	381	5.13535	1
TCGA-RD-A8NB	FEMALE	0	80	1	T3	3	N1	1	M0	0	Stage IIIA	3	G3	3	Dead	513	4.49883	0
TCGA-CD-8531	FEMALE	0	66	1	T3	3	N1	1	M0	0	Stage IIIA	3	G3	3	Alive	383	3.47675	0
TCGA-CD-8525	FEMALE	0	82	1	T3	3	N1	1	M0	0	Stage IIIA	3	G3	3	Alive	383	3.92453	0
TCGA-RD-A7BS	MALE	1	46	0	T3	3	N1	1	M0	0	Stage IIIA	3	G3	3	Dead	336	6.15076	1
TCGA-FP-8210	MALE	1	48	0	T3	3	N1	1	M0	0	Stage IIIA	3	G3	3	Dead	153	4.79444	0
TCGA-CD-8535	MALE	1	59	0	T3	3	N1	1	M0	0	Stage IIIA	3	G3	3	Alive	390	3.78196	0
TCGA-CG-5734	MALE	1	68	1	T3	3	N1	1	M0	0	Stage IIIA	3	G3	3	Dead	243	5.41855	1
TCGA-BR-4253	FEMALE	0	80	1	T3	3	N1	1	M0	0	Stage IIIA	3	G3	3	Dead	124	3.35339	0
TCGA-MX-A5UG	MALE	1	78	1	T3	3	N1	1	M0	0	Stage IIIA	3	G3	3	Dead	113	4.87643	1
TCGA-RD-A8N4	FEMALE	0	58	0	T3	3	N1	1	M0	0	Stage IIIA	3	G3	3	Alive	2171	3.88724	0
TCGA-VQ-A923	MALE	1	90	1	T3	3	N1	1	M0	0	Stage IIIA	3	G3	3	Dead	0	4.0201	0
TCGA-HU-A4GY	FEMALE	0	76	1	T4	4	N1	1	M0	0	Stage IIIA	3	G3	3	Alive	8	4.45944	0
TCGA-BR-7959	MALE	1	59	0	T4a	4	N1	1	M0	0	Stage IIIA	3	G3	3	Alive	1010	4.32673	0
TCGA-VQ-A8PU	FEMALE	0	72	1	T4a	4	N1	1	M0	0	Stage IIIA	3	G3	3	Dead	832	5.07698	1
TCGA-BR-A4J5	MALE	1	56	0	T4a	4	N1	1	M0	0	Stage IIIA	3	G3	3	Alive	862	4.48521	0
TCGA-D7-6525	MALE	1	58	0	T2	2	N2	2	M0	0	Stage IIIA	3	G3	3	Dead	406	4.51936	0
TCGA-RD-A8N6	FEMALE	0	78	1	T2	2	N2	2	M0	0	Stage IIIA	3	G3	3	Dead	272	5.61411	1
TCGA-CG-4444	MALE	1	76	1	T2b	2	N2	2	M0	0	Stage IIIA	3	G3	3	Alive	1431	4.91203	1
TCGA-D7-6520	MALE	1	53	0	T2b	2	N2	2	M0	0	Stage IIIA	3	G3	3	Alive	573	5.56654	1
TCGA-D7-8575	MALE	1	75	1	T3	3	N2	2	M0	0	Stage IIIA	3	G3	3	Dead	554	4.91974	1
TCGA-VQ-A8E0	MALE	1	68	1	T3	3	N2	2	M0	0	Stage IIIA	3	G3	3	Dead	562	4.68178	0
TCGA-D7-A6EX	FEMALE	0	72	1	T3	3	N2	2	M0	0	Stage IIIA	3	G3	3	Alive	344	3.7481	0
TCGA-BR-6564	FEMALE	0	46	0	T3	3	N2	2	M0	0	Stage IIIA	3	G3	3	Dead	794	5.03431	1
TCGA-D7-A6EZ	MALE	1	66	1	T3	3	N2	2	M0	0	Stage IIIA	3	G3	3	Alive	297	3.05403	0
TCGA-FP-A4BF	MALE	1	68	1	T3	3	N2	2	M0	0	Stage IIIA	3	G3	3	Dead	168	4.50951	0
TCGA-BR-6802	MALE	1	65	1	T3	3	N2	2	M0	0	Stage IIIA	3	G3	3	Alive	940	3.81769	0
TCGA-MX-A5UJ	FEMALE	0	86	1	T3	3	N2	2	M0	0	Stage IIIA	3	G3	3	Alive	600	5.07879	1
TCGA-D7-5578	MALE	1	80	1	T3	3	N2	2	M0	0	Stage IIIA	3	G3	3	Alive	385	6.51984	1
TCGA-D7-6818	MALE	1	53	0	T2	2	N3	3	M0	0	Stage IIIA	3	G3	3	Alive	321	4.41967	0
TCGA-D7-8574	MALE	1	72	1	T2	2	N3a	3	M0	0	Stage IIIA	3	G3	3	Alive	523	4.41825	0
TCGA-VQ-A91E	FEMALE	0	67	1	T4b	4	N0	0	M0	0	Stage IIIB	3	G3	3	Alive	664	6.77952	1
TCGA-BR-7958	MALE	1	60	1	T4b	4	N0	0	M0	0	Stage IIIB	3	G3	3	Alive	899	4.20389	0
TCGA-BR-8592	FEMALE	0	63	1	T4b	4	N1	1	M0	0	Stage IIIB	3	G3	3	Dead	191	4.62713	0
TCGA-BR-8686	MALE	1	69	1	T4b	4	N1	1	M0	0	Stage IIIB	3	G3	3	Dead	635	4.36354	0
TCGA-BR-8589	MALE	1	56	0	T4b	4	N1	1	M0	0	Stage IIIB	3	G3	3	Alive	825	3.30298	0
TCGA-RD-A8MV	MALE	1	56	0	T3	3	N2	2	M0	0	Stage IIIB	3	G3	3	Alive	3720	4.22017	0
TCGA-RD-A8MW	MALE	1	72	1	T3	3	N2	2	M0	0	Stage IIIB	3	G3	3	Dead	1153	6.16109	1
TCGA-VQ-A94T	MALE	1	73	1	T3	3	N2	2	M0	0	Stage IIIB	3	G3	3	Dead	342	2.194	0
TCGA-RD-A8N0	FEMALE	0	53	0	T3	3	N2	2	M0	0	Stage IIIB	3	G3	3	Alive	1236	4.56325	0
TCGA-RD-A8N1	MALE	1	70	1	T3	3	N2	2	M0	0	Stage IIIB	3	G3	3	Alive	3519	5.24741	1
TCGA-VQ-A91X	MALE	1	74	1	T3	3	N2	2	M0	0	Stage IIIB	3	G3	3	Dead	289	5.31938	1
TCGA-R5-A805	MALE	1	71	1	T3	3	N2	2	M0	0	Stage IIIB	3	G3	3	Dead	281	5.39303	1
TCGA-BR-A4IV	MALE	1	47	0	T4a	4	N2	2	M0	0	Stage IIIB	3	G3	3	Dead	869	3.92129	0
TCGA-BR-8683	MALE	1	75	1	T4a	4	N2	2	M0	0	Stage IIIB	3	G3	3	Dead	300	4.54854	0
TCGA-BR-A4J4	MALE	1	39	0	T4a	4	N2	2	M0	0	Stage IIIB	3	G3	3	Alive	16	4.98917	1
TCGA-HU-A4GC	MALE	1	74	1	T4a	4	N2	2	M0	0	Stage IIIB	3	G3	3	Alive	99	5.31029	1
TCGA-BR-A4PF	MALE	1	72	1	T4a	4	N2	2	M0	0	Stage IIIB	3	G3	3	Alive	35	3.43645	0
TCGA-VQ-AA6J	MALE	1	75	1	T4a	4	N2	2	M0	0	Stage IIIB	3	G3	3	Alive	838	4.05851	0
TCGA-BR-8058	FEMALE	0	53	0	T4a	4	N2	2	M0	0	Stage IIIB	3	G3	3	Alive	1133	5.52538	1
TCGA-HU-8608	MALE	1	70	1	T4a	4	N2	2	M0	0	Stage IIIB	3	G3	3	Alive	641	3.20028	0
TCGA-IN-A7NU	MALE	1	69	1	T3	3	N3	3	M0	0	Stage IIIB	3	G3	3	Alive	356	4.3163	0
TCGA-D7-8570	MALE	1	44	0	T3	3	N3a	3	M0	0	Stage IIIB	3	G3	3	Alive	752	4.37432	0
TCGA-BR-8371	MALE	1	62	1	T3	3	N3a	3	M0	0	Stage IIIB	3	G3	3	Dead	359	4.32583	0
TCGA-D7-A4YU	MALE	1	73	1	T3	3	N3a	3	M0	0	Stage IIIB	3	G3	3	Alive	500	4.45719	0
TCGA-BR-6705	FEMALE	0	68	1	T3	3	N3a	3	M0	0	Stage IIIB	3	G3	3	Dead	779	4.92015	1
TCGA-BR-A4J8	FEMALE	0	71	1	T3	3	N3a	3	M0	0	Stage IIIB	3	G3	3	Alive	411	4.11336	0
TCGA-BR-8677	FEMALE	0	74	1	T3	3	N3a	3	M0	0	Stage IIIB	3	G3	3	Alive	813	4.02583	0
TCGA-BR-8369	FEMALE	0	76	1	T3	3	N3a	3	M0	0	Stage IIIB	3	G3	3	Alive	427	4.49405	0
TCGA-BR-7723	MALE	1	59	0	T3	3	N3a	3	M0	0	Stage IIIB	3	G3	3	Dead	874	3.90653	0
TCGA-VQ-A8DT	MALE	1	43	0	T3	3	N3a	3	M0	0	Stage IIIB	3	G3	3	Alive	1484	5.95718	1
TCGA-D7-A6EY	FEMALE	0	72	1	T3	3	N3a	3	M0	0	Stage IIIB	3	G3	3	Dead	348	4.56971	0
TCGA-BR-8676	MALE	1	59	0	T3	3	N3a	3	M0	0	Stage IIIB	3	G3	3	Alive	229	2.84328	0
TCGA-BR-8367	MALE	1	55	0	T3	3	N3a	3	M0	0	Stage IIIB	3	G3	3	Dead	801	5.88079	1
TCGA-BR-6709	FEMALE	0	57	0	T3	3	N3a	3	M0	0	Stage IIIB	3	G3	3	Dead	370	4.85829	1
TCGA-BR-A44U	MALE	1	70	1	T3	3	N3a	3	M0	0	Stage IIIB	3	G3	3	Dead	422	5.31593	1
TCGA-D7-8576	FEMALE	0	54	0	T3	3	N3a	3	M0	0	Stage IIIB	3	G3	3	Dead	446	4.91428	1
TCGA-VQ-A8PE	MALE	1	78	1	T3	3	N3a	3	M0	0	Stage IIIB	3	G3	3	Dead	675	5.01034	1
TCGA-F1-A448	MALE	1	70	1	T3	3	N3b	3	M0	0	Stage IIIB	3	G3	3	Alive	647	5.71145	1
TCGA-VQ-A8PF	MALE	1	76	1	T3	3	N3b	3	M0	0	Stage IIIB	3	G3	3	Dead	76	4.01868	0
TCGA-BR-8296	FEMALE	0	58	0	T4b	4	N2	2	M0	0	Stage IIIC	3	G3	3	Dead	474	5.31404	1
TCGA-HU-A4GX	FEMALE	0	70	1	T4b	4	N2	2	M0	0	Stage IIIC	3	G3	3	Alive	616	4.75115	0
TCGA-BR-8687	FEMALE	0	67	1	T4b	4	N2	2	M0	0	Stage IIIC	3	G3	3	Dead	250	5.31579	1
TCGA-BR-8590	MALE	1	62	1	T4b	4	N2	2	M0	0	Stage IIIC	3	G3	3	Dead	284	4.50761	0
TCGA-BR-8364	FEMALE	0	42	0	T4b	4	N2	2	M0	0	Stage IIIC	3	G3	3	Alive	675	4.81061	0
TCGA-BR-8384	MALE	1	69	1	T4b	4	N2	2	M0	0	Stage IIIC	3	G3	3	Alive	113	4.94651	1
TCGA-BR-8361	FEMALE	0	71	1	T4b	4	N2	2	M0	0	Stage IIIC	3	G3	3	Alive	946	4.21746	0
TCGA-B7-A5TI	MALE	1	52	0	T4	4	N3	3	M0	0	Stage IIIC	3	G3	3	Alive	595	5.84237	1
TCGA-BR-8080	FEMALE	0	72	1	T4	4	N3a	3	M0	0	Stage IIIC	3	G3	3	Dead	292	5.25772	1
TCGA-BR-8485	FEMALE	0	68	1	T4	4	N3a	3	M0	0	Stage IIIC	3	G3	3	Alive	280	5.19105	1
TCGA-HU-A4GJ	FEMALE	0	60	1	T4	4	N3a	3	M0	0	Stage IIIC	3	G3	3	Alive	650	4.50853	0
TCGA-BR-8284	FEMALE	0	72	1	T4a	4	N3a	3	M0	0	Stage IIIC	3	G3	3	Dead	245	5.72959	1
TCGA-BR-8380	MALE	1	55	0	T4a	4	N3a	3	M0	0	Stage IIIC	3	G3	3	Alive	21	4.63784	0
TCGA-BR-8591	MALE	1	79	1	T4a	4	N3a	3	M0	0	Stage IIIC	3	G3	3	Alive	856	5.49236	1
TCGA-HF-A5NB	FEMALE	0	75	1	T4a	4	N3a	3	M0	0	Stage IIIC	3	G3	3	Alive	928	6.84822	1
TCGA-VQ-AA6K	MALE	1	59	0	T4a	4	N3a	3	M0	0	Stage IIIC	3	G3	3	Dead	378	3.67545	0
TCGA-BR-A4CR	FEMALE	0	70	1	T4b	4	N3a	3	M0	0	Stage IIIC	3	G3	3	Alive	0	4.14537	0
TCGA-BR-8372	MALE	1	63	1	T4b	4	N3a	3	M0	0	Stage IIIC	3	G3	3	Alive	951	4.49887	0
TCGA-BR-8382	FEMALE	0	67	1	T4b	4	N3a	3	M0	0	Stage IIIC	3	G3	3	Dead	762	4.19011	0
TCGA-BR-A4CS	MALE	1	77	1	T4b	4	N3a	3	M0	0	Stage IIIC	3	G3	3	Dead	45	3.56528	0
TCGA-CG-4476	MALE	1	69	1	T4b	4	N3a	3	M0	0	Stage IIIC	3	G3	3	Alive	0	4.99395	1
TCGA-VQ-A91Y	MALE	1	67	1	T4a	4	N3b	3	M0	0	Stage IIIC	3	G3	3	Dead	296	4.34827	0
TCGA-HU-A4H0	MALE	1	72	1	T4a	4	N3b	3	M0	0	Stage IIIC	3	G3	3	Alive	64	2.9697	0
TCGA-HU-A4H3	FEMALE	0	56	0	T4a	4	N3b	3	M0	0	Stage IIIC	3	G3	3	Alive	882	7.26585	1
TCGA-CG-5721	MALE	1	58	0	T4	4	N1	1	M0	0	Stage IV	4	G3	3	Alive	183	4.19752	0
TCGA-CG-4438	MALE	1	56	0	T4	4	N2	2	M0	0	Stage IV	4	G3	3	Alive	1645	6.52722	1
TCGA-BR-4368	FEMALE	0	78	1	T4	4	N2	2	M0	0	Stage IV	4	G3	3	Alive	0	4.03658	0
TCGA-CG-4469	MALE	1	70	1	T3	3	N3	3	M0	0	Stage IV	4	G3	3	Dead	215	4.89462	1
TCGA-RD-A7BT	MALE	1	66	1	T3	3	N3	3	M0	0	Stage IV	4	G3	3	Dead	262	3.78865	0
TCGA-VQ-A91Q	MALE	1	61	1	T3	3	N3	3	M0	0	Stage IV	4	G3	3	Dead	633	5.04164	1
TCGA-VQ-A8PM	MALE	1	56	0	T4	4	N3	3	M0	0	Stage IV	4	G3	3	Dead	57	4.71338	0
TCGA-R5-A7ZI	FEMALE	0	44	0	T4	4	N1	1	M1	1	Stage IV	4	G3	3	Alive	2267	2.79775	0
TCGA-CG-4301	FEMALE	0	75	1	T4	4	N1	1	M1	1	Stage IV	4	G3	3	Alive	92	4.79792	0
TCGA-CG-4306	MALE	1	90	1	T3	3	N2	2	M1	1	Stage IV	4	G3	3	Dead	1	4.86083	1
TCGA-CG-5722	FEMALE	0	67	1	T3	3	N2	2	M1	1	Stage IV	4	G3	3	Alive	30	4.50963	0
TCGA-IN-A7NR	FEMALE	0	64	1	T3	3	N3	3	M1	1	Stage IV	4	G3	3	Alive	198	5.91464	1
TCGA-CG-4440	FEMALE	0	68	1	T3	3	N3	3	M1	1	Stage IV	4	G3	3	Dead	122	6.12642	1
TCGA-CG-4462	FEMALE	0	72	1	T3	3	N3	3	M1	1	Stage IV	4	G3	3	Dead	0	5.25813	1
TCGA-CG-5724	MALE	1	59	0	T3	3	N3	3	M1	1	Stage IV	4	G3	3	Dead	366	4.85778	1
TCGA-VQ-A8DZ	MALE	1	70	1	T4	4	N3	3	M1	1	Stage IV	4	G3	3	Dead	396	5.87567	1
TCGA-CG-4465	FEMALE	0	69	1	T4	4	N3	3	M1	1	Stage IV	4	G3	3	Dead	274	4.52816	0
TCGA-D7-A748	FEMALE	0	41	0	T4a	4	N3	3	M1	1	Stage IV	4	G3	3	Dead	132	4.50625	0
