# Supplementary material for: DNMT family induces down-regulation of NDRG1 via DNA methylation and clinicopathological significance in gastric cancer
Source: PeerJ journal article supplement (doi:10.7717/peerj.12146), 2021-09-16
Supplement: Raw_data.zip [file NDRG1-DNMT-TCGA.xls]

## Sheet: Sheet1
A0_Samples	A18_Sex	A1_OS	A22_histological_type	A23_Tumor_tissue_site	A2_Event	A3_T	A4_N	A5_M	A6_Stage	A7_Grade	A8_New_Event	A8_New_Event_Time	A8_New_Event_Tissue	A8_New_Event_Type	A9_Cancer_Status	additional_studies	age_at_initial_pathologic_diagnosis	anatomic_neoplasm_subdivision	anatomic_neoplasm_subdivision_other	antireflux_treatment	antireflux_treatment_types.antireflux_treatment_type	barretts_esophagus	bcr_patient_barcode	bcr_patient_uuid	city_of_procurement	country_of_procurement	day_of_form_completion	days_to_birth	days_to_death	days_to_initial_pathologic_diagnosis	days_to_last_followup	drugs.drug.bcr_drug_barcode	drugs.drug.bcr_drug_uuid	drugs.drug.clinical_trail_drug_classification	drugs.drug.day_of_form_completion	drugs.drug.days_to_drug_therapy_end	drugs.drug.days_to_drug_therapy_start	drugs.drug.drug_name	drugs.drug.measure_of_response	drugs.drug.month_of_form_completion	drugs.drug.number_cycles	drugs.drug.prescribed_dose	drugs.drug.prescribed_dose_units	drugs.drug.regimen_indication	drugs.drug.regimen_indication_notes	drugs.drug.regimen_number	drugs.drug.route_of_administrations.route_of_administration	drugs.drug.therapy_ongoing	drugs.drug.therapy_types.therapy_type
TCGA-R5-A7ZI	FEMALE	2267	Stomach, Adenocarcinoma, Diffuse Type	Stomach	Alive	T4	N1	M1	Stage IV	G3	0	2267			WITH TUMOR		44	Stomach (NOS)	Not Available	YES	Proton Pump Inhibitors	No	TCGA-R5-A7ZI	B4376DA2-05CA-448F-A4BB-E7B62695491A	Houston	Texas	24	-16396	Not Applicable	0	1863
TCGA-CD-5799	MALE	396	Stomach, Intestinal Adenocarcinoma, Not Otherwise Specified (NOS)	Stomach	Alive	T2	N1	M0	Stage II	G3	0	396			TUMOR FREE		45	Antrum/Distal	Not Available	Not Available	Not Available	Not Available	TCGA-CD-5799	c991697f-77f9-412a-9bd1-0e47f7387cb2	Not Available	Vietnam	8	-16533	Not Applicable	0	21
TCGA-VQ-A8DZ	MALE	396	Stomach Adenocarcinoma, Signet Ring Type	Stomach	Dead	T4	N3	M1	Stage IV	G3	0	396			WITH TUMOR		70	Antrum/Distal	Not Available	NO	Not Available	No	TCGA-VQ-A8DZ	A8A9B061-B33C-4C69-BD4C-7F430474CDFD	Barretos	Sao Paulo	22	-25863	396	0	Not Available	TCGA-VQ-A8DZ-D64321	81F636F1-DE6B-45C1-87C8-9011394A5341	Not Available	28	341	201	Fluorouracil	Clinical Progressive Disease	8	Not Available	Not Available	Not Available	Not Available	Not Applicable	Not Available	Not Available	NO	Chemotherapy
TCGA-CG-4304	MALE		Stomach, Adenocarcinoma, Not Otherwise Specified (NOS)	Stomach		T2a	N0	M0	Stage IB	G2	0				Not Available		84	Cardia/Proximal	Not Available	Not Available	Not Available	Not Available	TCGA-CG-4304	8e005891-d6fe-4fee-a699-971fee4e70f1	Hamburg	Germany	Discrepancy	-31017	Not Applicable	0	Discrepancy
TCGA-D7-6525	MALE	406	Stomach, Adenocarcinoma, Diffuse Type	Stomach	Dead	T2	N2	M0	Stage IIIA	G3	1	171		Distant Metastasis	WITH TUMOR		58	Cardia/Proximal	Not Available	NO	Not Available	No	TCGA-D7-6525	82f9a197-040d-4c5e-89d9-d87a7aa0168d	Poznan	Poland	13	-21223	Not Applicable	0	181	TCGA-D7-6525-D22131	f522f3c0-8d56-404a-93b6-d2bc05b46882	Not Available	24	153	64	Not Available	Not Available	2	Not Available	Not Available	Not Available	ADJUVANT	Not Applicable	Not Available	IH	NO	Chemotherapy
TCGA-VQ-A8PD	MALE	496	Stomach, Adenocarcinoma, Not Otherwise Specified (NOS)	Stomach	Dead	T4a	N3	M0	Stage IIIC	G2	1	134	Other, specify	Distant Metastasis	WITH TUMOR		69	Fundus/Body	Not Available	NO	Not Available	No	TCGA-VQ-A8PD	76DF6303-A635-410B-A4D9-DB5DCE72FCBC	Barretos	Sao Paulo	30	-25244	496	0	Not Available	TCGA-VQ-A8PD-D64343	1F2B1403-26D0-485E-8B91-D5B2A3BBE0DD	Not Available	29	121	117	Fluorouracil	Clinical Progressive Disease	8	Not Available	Not Available	Not Available	Not Available	Not Applicable	Not Available	Not Available	NO	Chemotherapy
TCGA-RD-A7C1	MALE	507	Stomach, Adenocarcinoma, Diffuse Type	Stomach	Dead	T2	N0	M0	Stage IB	G3	1	438	Peritoneal Surfaces	Distant Metastasis	WITH TUMOR		82	Fundus/Body	Not Available	NO	Not Available	No	TCGA-RD-A7C1	C993A68D-0342-4DF4-A082-72094F061C86	Melbourne	Victoria	29	-30171	507	0	Not Available
TCGA-HF-7134	MALE	1588	Stomach, Intestinal Adenocarcinoma, Not Otherwise Specified (NOS)	Stomach	Alive	T1	N0	M0	Stage IA	G2	0	1588			TUMOR FREE		Not Available	Fundus/Body	Not Available	NO	Not Available	No	TCGA-HF-7134	1dbe1e26-3bcd-45cf-990e-ad7c8754f4d4	London	Ontario Canada	22	Not Available	Not Applicable	Not Available	Not Available
TCGA-HU-A4GJ	FEMALE	650	Stomach, Adenocarcinoma, Diffuse Type	Stomach	Alive	T4	N3a	M0	Stage IIIC	G3	1	547	Other, specify	Distant Metastasis	WITH TUMOR		60	Antrum/Distal	Not Available	Not Available	Not Available	No	TCGA-HU-A4GJ	05C4D180-A571-4ABB-BBDC-7363269DC0A6	Daegu	Not Available	11	-22079	Not Applicable	0	650	TCGA-HU-A4GJ-D42656;TCGA-HU-A4GJ-D42655;TCGA-HU-A4GJ-D42591	BE11EE31-1399-4671-A094-92FCC165049F;F6139820-C991-409B-B664-F52203E7A7E9;A166BF62-DB7E-4884-AFDF-7F3103766133	Not Available;Not Available;Not Available	26;26;26	677;222;187	564;39;39	TS-1;Cisplatin;Xeloda	Stable Disease;Stable Disease;Stable Disease	4;4;4	Not Available;Not Available;Not Available	Not Available;Not Available;Not Available	Not Available;Not Available;Not Available	Not Available;Not Available;Not Available	Not Applicable;Not Applicable;Not Applicable	Not Available;Not Available;Not Available	Not Available;Not Available;Not Available	NO;NO;NO	Chemotherapy;Chemotherapy;Chemotherapy
TCGA-BR-4256	MALE	284	Stomach, Adenocarcinoma, Not Otherwise Specified (NOS)	Stomach	Dead	TX	N1	M0		G2	0	284			Not Available		80	Antrum/Distal	Not Available	NO	Not Available	Not Available	TCGA-BR-4256	7b0d69ca-13a6-46e0-839c-e433bbede3ad	Kazan	Russia	6	-29441	Not Applicable	0	0
TCGA-VQ-AA6D	FEMALE	521	Stomach, Intestinal Adenocarcinoma, Tubular Type	Stomach	Alive	T4a	N1	M0	Stage IIIA	G2	0	521			TUMOR FREE		52	Antrum/Distal	Not Available	NO	Not Available	No	TCGA-VQ-AA6D	5779F7A7-05D7-4972-BD4F-AACB32420510	Barretos	Sao Paulo	9	-19090	Not Applicable	0	521	TCGA-VQ-AA6D-D64666	ACF2E282-F57B-4B12-AB29-082AE46A2AA2	Not Available	9	114	77	Fluorouracil	Complete Response	9	Not Available	Not Available	Not Available	Not Available	Not Applicable	Not Available	Not Available	NO	Chemotherapy
TCGA-BR-6707	MALE	605	Stomach, Adenocarcinoma, Not Otherwise Specified (NOS)	Stomach	Dead	T3	N0	M0	Stage IIA	G3	1	426		Locoregional Recurrence	TUMOR FREE		75	Fundus/Body	Not Available	Not Available	Not Available	Not Available	TCGA-BR-6707	df3df249-86c2-43d4-abe1-796cd7df653f	Kiev	Ukraine	1	-27529	Not Applicable	0	30	TCGA-BR-6707-D40122;TCGA-BR-6707-D40125;TCGA-BR-6707-D40136	6AFF62B3-4BA0-4BFD-B451-FE8172EE9B2A;A76318ED-0715-445A-9342-52629BA75F3D;9D139348-6DC9-4EE1-B638-75BE15D7848F	Not Available;Not Available;Not Available	13;13;13	491;491;491	426;426;426	Oxaliplatin;Leucovorin;5-Fluorouracil	Clinical Progressive Disease;Clinical Progressive Disease;Clinical Progressive Disease	2;2;2	Not Available;Not Available;Not Available	Not Available;Not Available;Not Available	Not Available;Not Available;Not Available	Not Available;Not Available;Not Available	Not Applicable;Not Applicable;Not Applicable	Not Available;Not Available;Not Available	Not Available;Not Available;Not Available	NO;NO;NO	Chemotherapy;Ancillary;Chemotherapy
TCGA-IN-7808	MALE	105	Stomach, Adenocarcinoma, Diffuse Type	Stomach	Dead	T3	N3	M1		G3	1			Distant Metastasis	WITH TUMOR		59	Gastroesophageal Junction	Not Available	NO	Not Available	No	TCGA-IN-7808	8f9be4e3-a1e5-4fa3-8d31-a53de781ed97	PITTSBURGH	PA	29	-21569	105	0	Not Available
TCGA-VQ-A8DV	MALE	403	Stomach, Intestinal Adenocarcinoma, Not Otherwise Specified (NOS)	Stomach	Dead	T2	N0	M0	Stage IB	G2	1	288	Liver	Distant Metastasis	WITH TUMOR		48	Antrum/Distal	Not Available	NO	Not Available	No	TCGA-VQ-A8DV	D7FE7004-6268-4DAC-B145-FF76E678E77E	Barretos	Sao Paulo	28	-17630	403	0	Not Available
TCGA-D7-6815	FEMALE	486	Stomach, Intestinal Adenocarcinoma, Tubular Type	Stomach	Alive	T2	N2	M0	Stage IIB	G2	0	486			TUMOR FREE		70	Fundus/Body	Not Available	NO	Not Available	No	TCGA-D7-6815	53086e20-a727-40d6-b42d-8030109b5130	Poznan	Poland	20	-25811	Not Applicable	0	111
TCGA-CG-4444	MALE	1431	Stomach, Adenocarcinoma, Diffuse Type	Stomach	Alive	T2b	N2	M0	Stage IIIA	G3	0	1431			TUMOR FREE		76	Fundus/Body	Not Available	Not Available	Not Available	Not Available	TCGA-CG-4444	5c087d33-0bd3-407d-8350-fabba6aec597	Hamburg	Germany	22	-27912	Not Applicable	0	1431	TCGA-CG-4444-D37563	51475E4B-5DD7-44D3-95E4-647A56B55C04	Not Available	4	92	31	5-Fluorouracil	Complete Response	12	Not Available	Not Available	Not Available	Not Available	Not Applicable	Not Available	Not Available	NO	Chemotherapy
TCGA-BR-6456	FEMALE	526	Stomach, Adenocarcinoma, Not Otherwise Specified (NOS)	Stomach	Dead	T3	N1	M0	Stage IIB	G2	0	526			Not Available		74	Fundus/Body	Not Available	Not Available	Not Available	Not Available	TCGA-BR-6456	1ca3c5e0-32b0-4467-8ec0-ca212e35d2b3	Tver	Russia	21	-27288	Not Applicable	0	0
TCGA-CG-4443	MALE	912	Stomach, Intestinal Adenocarcinoma, Not Otherwise Specified (NOS)	Stomach	Alive	T1	N0	M0	Stage IA	G2	0	912			Not Available		68	Fundus/Body	Not Available	Not Available	Not Available	Not Available	TCGA-CG-4443	8cb0144b-be6b-40a1-86a2-708f96d9b615	Hamburg	Germany	22	-24990	Not Applicable	0	912
TCGA-IN-AB1V	MALE	479	Stomach, Adenocarcinoma, Not Otherwise Specified (NOS)	Stomach	Alive	T1b	N0	M0	Stage IA	G2	0	479			TUMOR FREE		63	Gastroesophageal Junction	Not Available	Unknown	Unknown	Yes	TCGA-IN-AB1V	DDCC73BF-B10F-4FAB-96D4-3077947FCD2D	Scottdale	Pennsylvania	1	-23030	Not Applicable	0	238
TCGA-F1-6177	MALE	0	Stomach, Adenocarcinoma, Not Otherwise Specified (NOS)	Stomach	Alive	T1b	N1	MX	Stage I	G2	0	0			TUMOR FREE		90	Antrum/Distal	Not Available	NO	Not Available	No	TCGA-F1-6177	c3cba26e-38c2-4569-afd6-6b045e604808	Chapel Hill	North Carolina	8	-32873	Not Applicable	0	0
TCGA-BR-8362	MALE	398	Stomach, Adenocarcinoma, Not Otherwise Specified (NOS)	Stomach	Dead	T4b	N3a	M0	Stage IIIC	G3	1	356	Non-regional / Distant Lymph Nodes	Distant Metastasis	TUMOR FREE		65	Fundus/Body	Not Available	Not Available	Not Available	Unknown	TCGA-BR-8362	bdfd84fa-a8b9-46cd-b618-1267590da864	Tver	Russia	17	-23797	Not Applicable	0	11	TCGA-BR-8362-D53221;TCGA-BR-8362-D53222;TCGA-BR-8362-D53224;TCGA-BR-8362-D53227;TCGA-BR-8362-D53229;TCGA-BR-8362-D53230	732BB094-D0C1-4990-BC97-28A86AD82C9B;399C0ADA-6AAB-4323-9D45-37FC06D62F50;81189E50-888D-4571-A824-50BA383B1C86;3D5BE428-69B9-46E5-B1E0-FF6088F64E0E;2187C5A2-169D-47DE-8241-B5C1C986C3F8;E378C034-A069-42B4-8CF9-8667B1EF2FD1	Not Available;Not Available;Not Available;Not Available;Not Available;Not Available	10;10;10;10;10;10	154;154;154;375;375;375	24;24;24;370;370;370	Etoposide;5-Fluorouracil;Leucovorin;Cisplatin;5-Fluorouracil;Leucovorin	Complete Response;Complete Response;Complete Response;Clinical Progressive Disease;Clinical Progressive Disease;Clinical Progressive Disease	12;12;12;12;12;12	Not Available;Not Available;Not Available;Not Available;Not Available;Not Available	Not Available;Not Available;Not Available;Not Available;Not Available;Not Available	Not Available;Not Available;Not Available;Not Available;Not Available;Not Available	Not Available;Not Available;Not Available;Not Available;Not Available;Not Available	Not Applicable;Not Applicable;Not Applicable;Not Applicable;Not Applicable;Not Applicable	Not Available;Not Available;Not Available;Not Available;Not Available;Not Available	Not Available;Not Available;Not Available;Not Available;Not Available;Not Available	NO;NO;NO;NO;NO;NO	Chemotherapy;Chemotherapy;Ancillary;Chemotherapy;Chemotherapy;Ancillary
TCGA-VQ-AA68	FEMALE	1328	Stomach, Intestinal Adenocarcinoma, Tubular Type	Stomach	Alive	T4a	N3	M0	Stage IIIC	G2	0	1328			TUMOR FREE		52	Gastroesophageal Junction	Not Available	NO	Not Available	No	TCGA-VQ-AA68	3FF9B46B-325F-4655-AB40-953154753DAE	Barretos	Sao Paulo	9	-19304	Not Applicable	0	1219	TCGA-VQ-AA68-D64702	F3DDCC61-8947-4F46-94EF-40384F945D2E	Not Available	9	324	152	Fluorouracil	Complete Response	9	Not Available	Not Available	Not Available	Not Available	Not Applicable	Not Available	Not Available	NO	Chemotherapy
TCGA-BR-8370	MALE	101	Stomach, Adenocarcinoma, Diffuse Type	Stomach	Alive	T3	N3a	M0	Stage IIIB	G3	0	101			TUMOR FREE		64	Cardia/Proximal	Not Available	Not Available	Not Available	Unknown	TCGA-BR-8370	cae32f61-6b84-4122-af33-d8cbf410d4c8	Kiev	Ukraine	17	-23636	Not Applicable	0	17	TCGA-BR-8370-D41718;TCGA-BR-8370-D41719;TCGA-BR-8370-D41720	2B007983-2174-4949-AB60-59813177CDB2;6D0CF2F4-7914-4814-ACFA-A2CF3C5DF667;53DC2805-138F-4C32-9C80-E78660E5F4EC	Not Available;Not Available;Not Available	26;26;26	101;101;101	34;34;34	5-Fluorouracil;Leucovorin;Oxaliplatin	Complete Response;Complete Response;Complete Response	3;3;3	Not Available;Not Available;Not Available	Not Available;Not Available;Not Available	Not Available;Not Available;Not Available	Not Available;Not Available;Not Available	Not Applicable;Not Applicable;Not Applicable	Not Available;Not Available;Not Available	Not Available;Not Available;Not Available	NO;NO;NO	Chemotherapy;Ancillary;Chemotherapy
TCGA-D7-A74B	FEMALE	217	Stomach, Adenocarcinoma, Diffuse Type	Stomach	Dead	T3	N3	M0	Stage IIIB	G3	1	174		Locoregional Recurrence	WITH TUMOR		52	Fundus/Body	Not Available	NO	Not Available	No	TCGA-D7-A74B	ED3BF1DD-50E4-4ABF-8E04-BC1A97C493B3	pozna艅	wlkp	31	-19066	217	0	Not Available
TCGA-VQ-A91A	MALE	1200	Stomach, Intestinal Adenocarcinoma, Mucinous Type	Stomach	Alive	T3	N3a	M0	Stage IIIB	G1	1	129		New Primary Tumor	TUMOR FREE		67	Fundus/Body	Not Available	NO	Not Available	No	TCGA-VQ-A91A	3ED0D746-AB57-4097-94D5-5E89985B8F31	Barretos	Sao Paulo	23	-24670	Not Applicable	0	873
TCGA-D7-A6EY	FEMALE	348	Stomach, Intestinal Adenocarcinoma, Tubular Type	Stomach	Dead	T3	N3a	M0	Stage IIIB	G3	1				WITH TUMOR		72	Antrum/Distal	Not Available	NO	Not Available	No	TCGA-D7-A6EY	73BD696B-0F35-4F70-8888-8153B1BA9EE4	poznan	wlkp	28	-26526	348	0	Not Available
TCGA-CD-5804	MALE	0	Stomach, Adenocarcinoma, Not Otherwise Specified (NOS)	Stomach	Alive	T3	N1	M0		G2	0	0			Not Available		90	Antrum/Distal	Not Available	NO	Not Available	No	TCGA-CD-5804	9fa752b7-9873-4bad-9eba-8cc113705fed	Not Available	Vietnam	6	-32872	Not Applicable	0	0	TCGA-CD-5804-D70986;TCGA-CD-5804-D70987;TCGA-CD-5804-D70988	14CBDF92-8813-4D2B-9CE7-A1EF141AA798;06F96C25-20D4-46F4-B6A3-AAC61462AC31;E0C91FBE-70FD-4AF7-A779-9FEE454E4E69	Not Available;Not Available;Not Available	11;11;11	0;0;0	0;0;0	Epirubicin;Cisplatin;Capecitabine	Complete Response;Complete Response;Complete Response	3;3;3	Not Available;Not Available;Not Available	Not Available;Not Available;Not Available	Not Available;Not Available;Not Available	Not Available;Not Available;Not Available	Not Applicable;Not Applicable;Not Applicable	Not Available;Not Available;Not Available	Not Available;Not Available;Not Available	NO;NO;NO	Chemotherapy;Chemotherapy;Chemotherapy
TCGA-D7-A6EZ	MALE	297	Stomach, Intestinal Adenocarcinoma, Not Otherwise Specified (NOS)	Stomach	Alive	T3	N2	M0	Stage IIIA	G3	1				TUMOR FREE		66	Fundus/Body	Not Available	NO	Not Available	No	TCGA-D7-A6EZ	263B18E1-5722-4650-B16B-DAC1961A3AF8	poznan	wlkp	28	-24425	Not Applicable	0	297
TCGA-BR-8369	FEMALE	427	Stomach, Adenocarcinoma, Not Otherwise Specified (NOS)	Stomach	Alive	T3	N3a	M0	Stage IIIB	G3	1	419	Other, specify	Distant Metastasis	TUMOR FREE		76	Antrum/Distal	Not Available	Not Available	Not Available	Unknown	TCGA-BR-8369	f89ac782-e0b2-4e62-844d-2e00d10a1c65	Kiev	Ukraine	17	-28051	Not Applicable	0	25
TCGA-CD-A48C	FEMALE	353	Stomach, Adenocarcinoma, Not Otherwise Specified (NOS)	Stomach	Dead	T3	N1	M0	Stage IIB	G3	1	230		Locoregional Recurrence	TUMOR FREE		79	Antrum/Distal	Not Available	Not Available	Not Available	Not Available	TCGA-CD-A48C	EC02B33C-8094-45E8-B679-B14DBE75D66F	Not Available	Not Available	11	-29203	Not Applicable	0	4
TCGA-HF-7136	MALE		Stomach, Adenocarcinoma, Not Otherwise Specified (NOS)	Stomach		T3	N1	M0	Stage IIIA	G2	1		Other, specify	Distant Metastasis	WITH TUMOR		Not Available	Gastroesophageal Junction	Not Available	NO	Not Available	No	TCGA-HF-7136	647dc54f-a51b-40ea-9d97-c93598c2af71	Ottawa	Ontario	17	Not Available	Not Applicable	Not Available	Not Available	TCGA-HF-7136-D18759;TCGA-HF-7136-D18755;TCGA-HF-7136-D18757;TCGA-HF-7136-D18756;TCGA-HF-7136-D18760	f1e59e77-bd39-4df4-b2c0-b689f6e77e91;bc726173-e095-4b8f-9532-0d24c32d00de;e9d48e7a-d2e8-4e88-954b-585b89d3750c;6bd8740e-141a-4370-adb2-ce0dceb03bf7;385a379b-e305-47b1-aa71-4fc4c3fe1e63	Not Available;Not Available;Not Available;Not Available;Not Available	17;17;17;17;17	Not Available;Not Available;Not Available;Not Available;Not Available	Not Available;Not Available;Not Available;Not Available;Not Available	Cepecitabine;Fluorouracil;Epirubicin;Leucovorin;Cisplatin	Not Available;Not Available;Not Available;Not Available;Not Available	11;11;11;11;11	5;4;5;4;5	1050;800;76;40;90	mg/day;mg/day;mg/day;mg/day;mg/day	PROGRESSION;ADJUVANT;PROGRESSION;ADJUVANT;PROGRESSION	Not Applicable;Not Applicable;Not Applicable;Not Applicable;Not Applicable	Unknown;Unknown;Unknown;Unknown;Unknown	PO;IV;IV;IV;IV	NO;NO;NO;NO;NO	Chemotherapy;Chemotherapy;Chemotherapy;Chemotherapy;Chemotherapy
TCGA-VQ-A91V	MALE	1297	Stomach, Intestinal Adenocarcinoma, Tubular Type	Stomach	Alive	T3	N2	M0	Stage IIIA	G2	1	504	Lung	Distant Metastasis	WITH TUMOR		58	Gastroesophageal Junction	Not Available	NO	Not Available	Yes	TCGA-VQ-A91V	4A00CA75-D23A-4642-BEE8-DB4182517724	Barretos	Sao Paulo	9	-21505	Not Applicable	0	974	TCGA-VQ-A91V-D64685;TCGA-VQ-A91V-D64686	51E9B0EE-C954-42A8-9405-A956314733F2;D10959BE-23EE-4949-9566-C88A298F0369	Not Available;Not Available	9;9	228;228	77;77	Cisplatin;Fluorouracil	Clinical Progressive Disease;Clinical Progressive Disease	9;9	Not Available;Not Available	Not Available;Not Available	Not Available;Not Available	Not Available;Not Available	Not Applicable;Not Applicable	Not Available;Not Available	Not Available;Not Available	NO;NO	Chemotherapy;Chemotherapy
TCGA-BR-6803	FEMALE	949	Stomach, Adenocarcinoma, Diffuse Type	Stomach	Alive	T3	N0	M0	Stage IIA	G3	0	949			TUMOR FREE		54	Fundus/Body	Not Available	Not Available	Not Available	Not Available	TCGA-BR-6803	2f90209b-7464-4d7e-83d1-67850c263ded	Tver	Russia	31	-19751	Not Applicable	0	20
TCGA-VQ-A91Y	MALE	296	Stomach, Intestinal Adenocarcinoma, Tubular Type	Stomach	Dead	T4a	N3b	M0	Stage IIIC	G3	1	258	Lung	Distant Metastasis	WITH TUMOR		67	Antrum/Distal	Not Available	NO	Not Available	No	TCGA-VQ-A91Y	807BEA1D-975A-4D01-98C5-2748D832235B	Barretos	Sao Paulo	22	-24774	296	0	Not Available	TCGA-VQ-A91Y-D64390	3B7E868F-35CF-4044-AB80-ABFD27FF0316	Not Available	29	237	84	Fluorouracil	Clinical Progressive Disease	8	Not Available	Not Available	Not Available	Not Available	Not Applicable	Not Available	Not Available	NO	Chemotherapy
TCGA-CD-5800	FEMALE	400	Stomach, Intestinal Adenocarcinoma, Papillary Type	Stomach	Alive	T3	N0	M0	Stage II	G1	0	400			TUMOR FREE		51	Antrum/Distal	Not Available	Not Available	Not Available	Not Available	TCGA-CD-5800	eeb114ea-ecee-49ee-a162-b3b7bc0a60cd	Not Available	Vietnam	8	Not Available	Not Applicable	0	11
TCGA-D7-6521	MALE	564	Stomach, Adenocarcinoma, Diffuse Type	Stomach	Alive	T2b	N2	M0		G3	1	192	Other, specify	Locoregional Recurrence	TUMOR FREE		65	Fundus/Body	Not Available	NO	Not Available	No	TCGA-D7-6521	6de6b8e2-03eb-4f32-b5a3-bea73fc632b4	Poznan	Poland	13	-23776	Not Applicable	0	249	TCGA-D7-6521-D22135	2ce02f78-bf40-48d6-aedf-8989180c0249	Not Available	24	Not Available	29	PLFE/FLO	Not Available	2	Not Available	Not Available	Not Available	ADJUVANT	Not Applicable	Not Available	IV	YES	Chemotherapy
TCGA-BR-8371	MALE	359	Stomach, Adenocarcinoma, Not Otherwise Specified (NOS)	Stomach	Dead	T3	N3a	M0	Stage IIIB	G3	1	357	Other, specify	Distant Metastasis	TUMOR FREE		62	Cardia/Proximal	Not Available	Not Available	Not Available	Unknown	TCGA-BR-8371	4020b1b1-576d-4869-9ff5-552e3afb3ab5	Kiev	Ukraine	17	-22883	Not Applicable	0	11	TCGA-BR-8371-D41722;TCGA-BR-8371-D41723;TCGA-BR-8371-D41725;TCGA-BR-8371-D41728;TCGA-BR-8371-D41731;TCGA-BR-8371-D41732	06207711-8147-42E4-938A-A602B8425ECD;39523C55-7A3A-4A20-9378-88B060DD0AF6;1A29866F-A3AB-406F-ADD0-E2AA26F08165;D3A9D9D2-E811-4F2C-8816-FCA1D0200F11;DE1CD845-D8FA-4318-AAFC-3A9053C205BC;49322124-6697-43E0-8BBB-424DA948A388	Not Available;Not Available;Not Available;Not Available;Not Available;Not Available	26;26;26;26;26;26	189;98;189;351;189;351	31;81;31;337;119;337	5-Fluorouracil;Polyplatillen;Leucovorin;Polyplatillen;Cisplatin;Etoposide	Clinical Progressive Disease;Clinical Progressive Disease;Clinical Progressive Disease;Clinical Progressive Disease;Clinical Progressive Disease;Clinical Progressive Disease	3;3;3;3;3;3	Not Available;Not Available;Not Available;Not Available;Not Available;Not Available	Not Available;Not Available;Not Available;Not Available;Not Available;Not Available	Not Available;Not Available;Not Available;Not Available;Not Available;Not Available	Not Available;Not Available;Not Available;Not Available;Not Available;Not Available	Not Applicable;Not Applicable;Not Applicable;Not Applicable;Not Applicable;Not Applicable	Not Available;Not Available;Not Available;Not Available;Not Available;Not Available	Not Available;Not Available;Not Available;Not Available;Not Available;Not Available	NO;NO;NO;NO;NO;NO	Chemotherapy;Chemotherapy;Ancillary;Chemotherapy;Chemotherapy;Chemotherapy
TCGA-D7-6524	MALE	543	Stomach, Adenocarcinoma, Diffuse Type	Stomach	Alive	T2	N1	M0	Stage II	G3	1	543	Non-regional / Distant Lymph Nodes	Locoregional Recurrence	TUMOR FREE		53	Antrum/Distal	Not Available	NO	Not Available	No	TCGA-D7-6524	7ef3f065-1928-4a58-b5a6-76dddb8488cf	Poznan	Poland	13	-19532	Not Applicable	0	21
TCGA-F1-6875	MALE	2197	Stomach, Adenocarcinoma, Not Otherwise Specified (NOS)	Stomach	Dead	T2	N0	M0	Stage IA	G2	0	2197			TUMOR FREE		79	Antrum/Distal	Not Available	Not Available	Not Available	Not Available	TCGA-F1-6875	283776cd-32e8-4a79-bed1-1411c9d3a9e0	Chapel Hill	NC	10	-29209	2197	0	Not Available
TCGA-HU-A4G3	MALE	170	Stomach, Intestinal Adenocarcinoma, Tubular Type	Stomach	Alive	T2	N2	M0	Stage IIB	G2	0	170			TUMOR FREE		54	Antrum/Distal	Not Available	Not Available	Not Available	No	TCGA-HU-A4G3	6EEEE564-1057-42E4-BFCE-B6FE17D58D10	Daegu	Not Available	10	-20064	Not Applicable	0	170	TCGA-HU-A4G3-D42583;TCGA-HU-A4G3-D42584;TCGA-HU-A4G3-D42585	AC5F6D07-2A0C-4D66-AC41-6CA7629E4A9F;85535BA0-CB53-4E72-AA93-66DA4FCF2273;22875D21-8B67-4CE0-B659-80AF69F5A06D	Not Available;Not Available;Not Available	26;26;26	97;184;184	20;111;111	Mitomycin C;Doxifluridine;COPOLANG CAPS	Stable Disease;Stable Disease;Stable Disease	4;4;4	Not Available;Not Available;Not Available	Not Available;Not Available;Not Available	Not Available;Not Available;Not Available	Not Available;Not Available;Not Available	Not Applicable;Not Applicable;Not Applicable	Not Available;Not Available;Not Available	Not Available;Not Available;Not Available	NO;NO;NO	Chemotherapy;Chemotherapy;Chemotherapy
TCGA-FP-8631	MALE	17	Stomach, Intestinal Adenocarcinoma, Not Otherwise Specified (NOS)	Stomach	Alive	T3	N2	MX	Stage IIIA	G2	0	17			TUMOR FREE		68	Gastroesophageal Junction	Not Available	Not Available	Not Available	Unknown	TCGA-FP-8631	1a4313e7-a770-4a0e-93f1-c10562f521e3	Dallas	Texas	28	-24898	Not Applicable	0	17
TCGA-BR-8486	FEMALE	0	Stomach, Adenocarcinoma, Not Otherwise Specified (NOS)	Stomach	Alive	T1b	N0	M0	Stage IA	G2	0	0			TUMOR FREE		90	Fundus/Body	Not Available	Not Available	Not Available	Unknown	TCGA-BR-8486	b8a1c8c7-3945-4d84-8f58-3a1a1eb10730	Tver	Russia	31	-32872	Not Applicable	0	0
TCGA-HU-A4GN	MALE	912	Stomach, Intestinal Adenocarcinoma, Tubular Type	Stomach	Alive	T2	N1	M0	Stage IIA	G2	1	168	Other, specify		TUMOR FREE		61	Antrum/Distal	Not Available	Not Available	Not Available	Yes	TCGA-HU-A4GN	F8A32CB0-8C3D-4BC2-8E53-561B89000BE7	Daegu	Not Available	11	-22288	Not Applicable	0	640	TCGA-HU-A4GN-D42594;TCGA-HU-A4GN-D42593;TCGA-HU-A4GN-D42592	47A48546-CB6A-4D81-871F-82E175DF3D42;426895CB-30C3-4D05-9A56-4E5CD847DAE8;C18BBECB-2DA0-40E6-B8CD-1BEFB5195362	Not Available;Not Available;Not Available	26;26;26	614;Not Available;100	107;107;27	Copolang;Doxifluridine;Mitomycin	Stable Disease;Not Applicable;Stable Disease	4;4;4	Not Available;Not Available;Not Available	Not Available;Not Available;Not Available	Not Available;Not Available;Not Available	Not Available;Not Available;Not Available	Not Applicable;Not Applicable;Not Applicable	Not Available;Not Available;Not Available	Not Available;Not Available;Not Available	NO;YES;NO	Chemotherapy;Chemotherapy;Chemotherapy
TCGA-BR-4371	FEMALE	0	Stomach, Adenocarcinoma, Not Otherwise Specified (NOS)	Stomach	Alive	T2	NX	M0		G1	0	0			Not Available		71	Not Available	Not Available	NO	Not Available	Not Available	TCGA-BR-4371	c2f90f1a-a81b-465e-8e6b-5f02a21b27dd	Saratov	Russia	2	-26290	Not Applicable	0	0
TCGA-VQ-AA69	MALE	864	Stomach, Intestinal Adenocarcinoma, Not Otherwise Specified (NOS)	Stomach	Alive	T3	N2	M0	Stage IIIA	G2	0	864			TUMOR FREE		35	Gastroesophageal Junction	Not Available	NO	Not Available	No	TCGA-VQ-AA69	46874009-4B32-43FF-A36A-236A3CA28FEF	Barretos	Sao Paulo	20	-13087	Not Applicable	0	542
TCGA-BR-6454	MALE	0	Stomach, Adenocarcinoma, Not Otherwise Specified (NOS)	Stomach	Alive	T3	N0	M0	Stage IIA	G3	0	0			Not Available		58	Cardia/Proximal	Not Available	Not Available	Not Available	Not Available	TCGA-BR-6454	ac2cbce4-4ba8-42c9-ac61-70f42995588e	Tver	Russia	21	-21501	Not Applicable	0	0
TCGA-BR-A4IY	MALE	392	Stomach, Adenocarcinoma, Not Otherwise Specified (NOS)	Stomach	Alive	T4a	N0	M0	Stage IIB	G3	0	392			TUMOR FREE		58	Antrum/Distal	Not Available	NO	Not Available	No	TCGA-BR-A4IY	98C56F92-547B-473D-9FE0-2135DD5A96A8	Hanoi	Vietnam	8	-21314	Not Applicable	0	12	TCGA-BR-A4IY-D48380;TCGA-BR-A4IY-D48381;TCGA-BR-A4IY-D48382;TCGA-BR-A4IY-D48383	E88DF1F0-B216-4AB7-BFFE-F01D9777ECF0;0CE8FB91-8C39-4B33-92EA-63F8711B7651;87E368CF-2B82-4C16-88DA-AA73CBF97A74;311865C2-C577-46CF-AC6B-981D398F1C6A	Not Available;Not Available;Not Available;Not Available	12;12;12;12	177;177;177;177	47;47;47;47	Oxaliplatin;Epirubicin;Xeloda;Dexamethasone	Complete Response;Complete Response;Complete Response;Complete Response	9;9;9;9	Not Available;Not Available;Not Available;Not Available	Not Available;Not Available;Not Available;Not Available	Not Available;Not Available;Not Available;Not Available	Not Available;Not Available;Not Available;Not Available	Not Applicable;Not Applicable;Not Applicable;Not Applicable	Not Available;Not Available;Not Available;Not Available	Not Available;Not Available;Not Available;Not Available	NO;NO;NO;NO	Chemotherapy;Chemotherapy;Chemotherapy;Ancillary
TCGA-D7-A4YY	MALE	419	Stomach, Adenocarcinoma, Not Otherwise Specified (NOS)	Stomach	Alive	T3	N3a	M0	Stage IIIB	G3	0	419			TUMOR FREE		61	Antrum/Distal	Not Available	NO	Not Available	No	TCGA-D7-A4YY	17F63789-2EE3-4CD9-9273-5FA73662DB39	Poznan	Not Available	1	-22287	Not Applicable	0	104	TCGA-D7-A4YY-D39757	54D75973-D9DB-40AA-B9FA-473BDC76FD2B	Not Available	1	Not Available	40	5-fluorouracil	Not Applicable	2	Not Available	Not Available	Not Available	Not Available	Not Applicable	Not Available	Not Available	YES	Chemotherapy
TCGA-CD-8526	FEMALE	381	Stomach, Intestinal Adenocarcinoma, Not Otherwise Specified (NOS)	Stomach	Alive	T3	N1	M0	Stage IIIA	G3	0	381			TUMOR FREE		73	Fundus/Body	Not Available	Not Available	Not Available	Not Available	TCGA-CD-8526	6a9b3d65-ae15-4e3c-84ed-468e2196372b	Not Available	Not Available	15	-26840	Not Applicable	0	2	TCGA-CD-8526-D70974;TCGA-CD-8526-D70975;TCGA-CD-8526-D70976	E8635ECC-0E31-419C-A35F-159E87193100;BB040B53-AA70-4E65-9F82-1E8FEB3EC19C;43190BA9-4F9B-4061-ACBB-33C79D30D8DF	Not Available;Not Available;Not Available	11;11;11	111;111;111	62;62;62	Epirubicin;Cisplatin;Capecitabine	Complete Response;Complete Response;Complete Response	3;3;3	Not Available;Not Available;Not Available	Not Available;Not Available;Not Available	Not Available;Not Available;Not Available	Not Available;Not Available;Not Available	Not Applicable;Not Applicable;Not Applicable	Not Available;Not Available;Not Available	Not Available;Not Available;Not Available	NO;NO;NO	Chemotherapy;Chemotherapy;Chemotherapy
TCGA-CG-4474	FEMALE	0	Stomach, Adenocarcinoma, Diffuse Type	Stomach	Alive	T4a	N2	M1	Stage IV	G3	0	0			WITH TUMOR		67	Antrum/Distal	Not Available	Not Available	Not Available	Not Available	TCGA-CG-4474	39dd61a8-cd17-4df3-ae17-61e239eb00bd	Hamburg	Germany	22	-24686	Not Applicable	0	0
TCGA-CD-8536	MALE	378	Stomach, Adenocarcinoma, Not Otherwise Specified (NOS)	Stomach	Alive	T3	N0	M0	Stage II	G3	0	378			TUMOR FREE		74	Fundus/Body	Not Available	Not Available	Not Available	Not Available	TCGA-CD-8536	b2f6d8f3-3182-4e5e-be20-8470cfb832c5	Not Available	Not Available	15	-27328	Not Applicable	0	3	TCGA-CD-8536-D70950;TCGA-CD-8536-D70951;TCGA-CD-8536-D70952	FBAFB7D9-C8E3-4ABD-885D-D41C2667EB4A;F22F097F-3618-41DA-BB33-29F23C2EF4C0;C71F7C1C-FEED-41FF-AFEF-E0C54162B7EB	Not Available;Not Available;Not Available	11;11;11	135;135;135	54;54;54	Epirubicin;Cisplatin;Capecitabine	Complete Response;Complete Response;Complete Response	3;3;3	Not Available;Not Available;Not Available	Not Available;Not Available;Not Available	Not Available;Not Available;Not Available	Not Available;Not Available;Not Available	Not Applicable;Not Applicable;Not Applicable	Not Available;Not Available;Not Available	Not Available;Not Available;Not Available	NO;NO;NO	Chemotherapy;Chemotherapy;Chemotherapy
TCGA-BR-8060	FEMALE	348	Stomach, Adenocarcinoma, Not Otherwise Specified (NOS)	Stomach	Dead	T2	N2	M0	Stage IIB	G3	0	348			TUMOR FREE		75	Cardia/Proximal	Not Available	Not Available	Not Available	Not Available	TCGA-BR-8060	23ef21a0-3695-4ca2-99e2-274805f11892	Tver	Russia	2	-27561	Not Applicable	0	40
TCGA-VQ-A91S	MALE	1000	Stomach, Intestinal Adenocarcinoma, Tubular Type	Stomach	Alive	T4b	N1	M0	Stage IIIB	GX	0	1000			TUMOR FREE		63	Fundus/Body	Not Available	NO	Not Available	No	TCGA-VQ-A91S	D22DE643-5F93-42D0-9199-1F55405241D6	Barretos	Sao Paulo	20	-23187	Not Applicable	0	690	TCGA-VQ-A91S-D65299	81AAF0DA-6506-45FB-8B3C-84257778CBD3	Not Available	21	238	122	Fluorouracil	Complete Response	9	Not Available	Not Available	Not Available	Not Available	Not Applicable	Not Available	Not Available	NO	Chemotherapy
TCGA-CG-5727	MALE	2405	Stomach, Intestinal Adenocarcinoma, Not Otherwise Specified (NOS)	Stomach	Alive	T3	N0	M0	Stage II	G3	0	2405			TUMOR FREE		66	Fundus/Body	Not Available	Not Available	Not Available	No	TCGA-CG-5727	b75eb694-8e9d-4dbb-b536-7d278c728cbb	Hamburg	Germany	22	-24289	Not Applicable	0	944
TCGA-CG-5724	MALE	366	Stomach, Adenocarcinoma, Diffuse Type	Stomach	Dead	T3	N3	M1	Stage IV	G3	1	122			WITH TUMOR		59	Antrum/Distal	Not Available	Not Available	Not Available	No	TCGA-CG-5724	0b4e8d73-459d-4930-9d1a-abb8d53e1844	Hamburg	Germany	22	-21762	366	0	Not Available	TCGA-CG-5724-D37584	ADDADFDC-26FB-43B1-AAA7-D38323D40063	Not Available	4	305	153	Cisplatin	Clinical Progressive Disease	12	Not Available	Not Available	Not Available	Not Available	Not Applicable	Not Available	Not Available	NO	Chemotherapy
TCGA-BR-8291	MALE	607	Stomach, Adenocarcinoma, Diffuse Type	Stomach	Dead	T3	N1	M0	Stage IIB	GX	0	607			TUMOR FREE		61	Antrum/Distal	Not Available	Unknown	Unknown	Unknown	TCGA-BR-8291	264b781d-122b-433d-80d4-59fbec262f22	Tver	Russia	13	-22552	Not Applicable	0	36	TCGA-BR-8291-D41695;TCGA-BR-8291-D41696;TCGA-BR-8291-D41697	26144004-F993-42B6-85B0-A551B6560AEE;E26893D2-FE11-4D1C-B1D7-144430B206B1;584B220E-2507-46F1-8637-1102A6B4FF15	Not Available;Not Available;Not Available	26;26;26	137;137;137	39;39;39	Etoposide;Leucovorin;5-Fluorouracil	Complete Response;Complete Response;Complete Response	3;3;3	Not Available;Not Available;Not Available	Not Available;Not Available;Not Available	Not Available;Not Available;Not Available	Not Available;Not Available;Not Available	Not Applicable;Not Applicable;Not Applicable	Not Available;Not Available;Not Available	Not Available;Not Available;Not Available	NO;NO;NO	Chemotherapy;Ancillary;Chemotherapy
TCGA-VQ-A94U	MALE	819	Stomach Adenocarcinoma, Signet Ring Type	Stomach	Alive	T4a	N0	M0	Stage IIB	G3	0	819			TUMOR FREE		70	Antrum/Distal	Not Available	NO	Not Available	No	TCGA-VQ-A94U	A0402DE7-08AE-4528-9E77-289295AD8EF8	Barretos	Sao Paulo	20	-25925	Not Applicable	0	468
TCGA-VQ-A8PU	FEMALE	832	Stomach, Intestinal Adenocarcinoma, Tubular Type	Stomach	Dead	T4a	N1	M0	Stage IIIA	G3	0	832			TUMOR FREE		72	Fundus/Body	Not Available	NO	Not Available	No	TCGA-VQ-A8PU	CB4394EC-1991-460D-B823-B74E005E3DA7	Barretos	Sao Paulo	9	-26625	Not Applicable	0	717	TCGA-VQ-A8PU-D64696	C426D913-C9BD-4C61-AB68-1878AFB6B6F1	Not Available	9	288	139	Fluorouracil	Complete Response	9	Not Available	Not Available	Not Available	Not Available	Not Applicable	Not Available	Not Available	NO	Chemotherapy
TCGA-VQ-A8DU	MALE	166	Stomach, Intestinal Adenocarcinoma, Tubular Type	Stomach	Dead	T3	N2	M0	Stage IIIA	G2	1	158	Liver	Distant Metastasis	WITH TUMOR		63	Antrum/Distal	Not Available	NO	Not Available	No	TCGA-VQ-A8DU	6FA6ACE1-4B39-44DB-9413-73EB21588AA1	Barretos	Sao Paulo	22	-23042	166	0	Not Available	TCGA-VQ-A8DU-D64319	E2E1E597-3757-4066-8D2F-AEB723369B31	Not Available	28	130	130	Fluorouracil	Clinical Progressive Disease	8	Not Available	Not Available	Not Available	Not Available	Not Applicable	Not Available	Not Available	NO	Chemotherapy
TCGA-VQ-A923	MALE	0	Stomach, Intestinal Adenocarcinoma, Tubular Type	Stomach	Dead	T3	N1	M0	Stage IIIA	G3	0	0			TUMOR FREE		90	Fundus/Body	Not Available	NO	Not Available	No	TCGA-VQ-A923	4BAE9C20-74A4-4AD3-8CF3-76E41217F389	Barretos	Sao Paulo	9	-32873	0	0	Not Available
TCGA-MX-A5UG	MALE	113	Stomach, Adenocarcinoma, Diffuse Type	Stomach	Dead	T3	N1	M0	Stage IIIA	G3	0	113			TUMOR FREE		78	Antrum/Distal	Not Available	NO	Not Available	No	TCGA-MX-A5UG	F72A26E8-7F96-4D86-B37B-7DC35F681133	New York	New York	10	-28714	113	0	Not Available
TCGA-F1-A448	MALE	647	Stomach, Intestinal Adenocarcinoma, Mucinous Type	Stomach	Alive	T3	N3b	M0	Stage IIIB	G3	0	647			TUMOR FREE		70	Antrum/Distal	Not Available	NO	Not Available	No	TCGA-F1-A448	CCA74404-CD91-4A69-AE09-BFB5D9142D3D	Chapel Hill	NC	31	-25846	Not Applicable	0	252	TCGA-F1-A448-D36509;TCGA-F1-A448-D36510;TCGA-F1-A448-D36511	FDD21475-195B-4A98-A73F-93B1AB0DF95E;F8F5A539-3E12-4643-BB34-E6ADCCC2E2D1;2E8456F0-6FFA-4F5D-9F69-D77692059B4A	Not Available;Not Available;Not Available	31;31;31	119;119;175	98;98;161	Capecitabine;Oxaliplatin;5FU	Complete Response;Complete Response;Complete Response	10;10;10	Not Available;Not Available;Not Available	Not Available;Not Available;Not Available	Not Available;Not Available;Not Available	Not Available;Not Available;Not Available	Not Applicable;Not Applicable;Not Applicable	Not Available;Not Available;Not Available	Not Available;Not Available;Not Available	NO;NO;NO	Chemotherapy;Chemotherapy;Chemotherapy
TCGA-R5-A7ZE	FEMALE	554	Stomach, Intestinal Adenocarcinoma, Tubular Type	Stomach	Dead	T3	N2	M0	Stage IIIA	G2	0	554			WITH TUMOR		66	Gastroesophageal Junction	Not Available	YES	Proton Pump Inhibitors	No	TCGA-R5-A7ZE	7BEF9122-0FB4-4F2E-BB6E-67EDDC3EA9AF	Not Available	Not Available	24	-24328	554	0	Not Available
TCGA-D7-A748	FEMALE	132	Stomach, Adenocarcinoma, Diffuse Type	Stomach	Dead	T4a	N3	M1	Stage IV	G3	1	99	Peritoneal Surfaces	Distant Metastasis	WITH TUMOR		41	Fundus/Body	Not Available	Unknown	Not Available	Unknown	TCGA-D7-A748	BF0F1735-F94D-4B82-8F91-2FD2BAC80E32	poznan	wlkp	7	-15190	132	0	Not Available	TCGA-D7-A748-D58331;TCGA-D7-A748-D58330;TCGA-D7-A748-D61641;TCGA-D7-A748-D61642	D328BEA0-529E-4E17-B022-5A1C459086C9;11C1813D-4CA0-4DC8-A02D-BDAE40E1420D;4EF5718C-A697-461C-9D3C-1B49F9F263EA;9A645470-B657-41A6-8022-AFD121297378	Not Available;Not Available;Not Available;Not Available	7;7;2;2	104;72;104;104	104;40;104;104	epirubicinum;5-FU;Oxaliplatinum;Capecytabinum	Clinical Progressive Disease;Clinical Progressive Disease;Clinical Progressive Disease;Clinical Progressive Disease	4;4;7;7	Not Available;Not Available;Not Available;Not Available	Not Available;Not Available;Not Available;Not Available	Not Available;Not Available;Not Available;Not Available	Not Available;Not Available;Not Available;Not Available	Not Applicable;Not Applicable;Not Applicable;Not Applicable	Not Available;Not Available;Not Available;Not Available	Not Available;Not Available;Not Available;Not Available	NO;NO;NO;NO	Chemotherapy;Chemotherapy;Chemotherapy;Chemotherapy
TCGA-CD-8533	MALE	468	Stomach, Adenocarcinoma, Not Otherwise Specified (NOS)	Stomach	Alive	T3	N0	M0	Stage II	G3	1	226	Other, specify	Distant Metastasis	TUMOR FREE		48	Antrum/Distal	Not Available	Not Available	Not Available	Not Available	TCGA-CD-8533	c1cf00be-1a34-49aa-b1ab-6b2e26832c19	Not Available	Not Available	15	-17821	Not Applicable	0	4	TCGA-CD-8533-D70959	37E718D6-509F-4D7B-A3F0-306F9FB6E219	Not Available	11	245	226	Capecitabine	Clinical Progressive Disease	3	Not Available	Not Available	Not Available	Not Available	Not Applicable	Not Available	Not Available	NO	Chemotherapy
TCGA-CG-5717	MALE	212	Stomach, Adenocarcinoma, Not Otherwise Specified (NOS)	Stomach	Dead	T2b	N1	M0	Stage II	G3	1	120			WITH TUMOR		58	Cardia/Proximal	Not Available	Not Available	Not Available	No	TCGA-CG-5717	bdc3899e-15ae-421f-829b-0e07fbd27c60	Hamburg	Germany	22	-21458	212	0	Not Available	TCGA-CG-5717-D37581;TCGA-CG-5717-D37582;TCGA-CG-5717-D37583	E8A29207-AB7D-40CD-888D-29BBAA62AE93;83198ACC-3ABA-46A0-BD76-E83B633E034B;ECAD283C-296E-408E-B401-1B06C531253A	Not Available;Not Available;Not Available	4;4;4	212;212;212	151;151;151	5-Fluorouracil;Cisplatin;Folinic acid	Clinical Progressive Disease;Clinical Progressive Disease;Clinical Progressive Disease	12;12;12	Not Available;Not Available;Not Available	Not Available;Not Available;Not Available	Not Available;Not Available;Not Available	Not Available;Not Available;Not Available	Not Applicable;Not Applicable;Not Applicable	Not Available;Not Available;Not Available	Not Available;Not Available;Not Available	NO;NO;NO	Chemotherapy;Chemotherapy;Chemotherapy
TCGA-CD-8528	FEMALE	375	Stomach, Adenocarcinoma, Not Otherwise Specified (NOS)	Stomach	Alive	T4	N0	M0	Stage IIIA	G3	0	375			TUMOR FREE		43	Antrum/Distal	Not Available	Not Available	Not Available	Not Available	TCGA-CD-8528	1a1f2197-e303-46e4-8871-53f2eb2e599a	Not Available	Not Available	15	-15986	Not Applicable	0	3	TCGA-CD-8528-D71003;TCGA-CD-8528-D71004;TCGA-CD-8528-D71005	DE755720-EF36-4B5A-9B82-AD5417F85B40;8314ED6C-B20C-46BC-8769-A51E3BF125AA;82FA7470-7B62-4BD9-B780-6E403C8DA7A9	Not Available;Not Available;Not Available	12;12;12	232;232;231	105;105;105	Epirubicin;Cisplatin;5-Flourouracil	Complete Response;Complete Response;Complete Response	3;3;3	Not Available;Not Available;Not Available	Not Available;Not Available;Not Available	Not Available;Not Available;Not Available	Not Available;Not Available;Not Available	Not Applicable;Not Applicable;Not Applicable	Not Available;Not Available;Not Available	Not Available;Not Available;Not Available	NO;NO;NO	Chemotherapy;Chemotherapy;Chemotherapy
TCGA-B7-5816	FEMALE	812	Stomach, Adenocarcinoma, Diffuse Type	Stomach	Alive	T4a	N0	M0	Stage IIB	G3	0	812			TUMOR FREE		51	Fundus/Body	Not Available	Not Available	Not Available	No	TCGA-B7-5816	f07070c0-fd0a-4c19-ba1e-5f06b933cd7c	Not Available	Russia	14	-18698	Not Applicable	0	171
TCGA-BR-4367	MALE	0	Stomach, Adenocarcinoma, Not Otherwise Specified (NOS)	Stomach	Alive	TX	N1	M0		G3	0	0			Not Available		78	Antrum/Distal	Not Available	NO	Not Available	Not Available	TCGA-BR-4367	d139bd0c-2eeb-44ec-856b-e77cb03d294e	Kazan	Russia	6	-28817	Not Applicable	0	0
TCGA-IN-AB1X	FEMALE	411	Stomach, Adenocarcinoma, Not Otherwise Specified (NOS)	Stomach	Alive	T3	N0	M0	Stage IIA	G3	0	411			TUMOR FREE		78	Gastroesophageal Junction	Not Available	Unknown	Unknown	Unknown	TCGA-IN-AB1X	1E5A3796-6249-4A91-9FC8-0C273E337F29	Everett	Pennsylvania	1	-28493	Not Applicable	0	190	TCGA-IN-AB1X-D61527;TCGA-IN-AB1X-D61528;TCGA-IN-AB1X-D61529	7036BFC0-D6C7-452A-BE03-8CF57856E717;481EDF4C-2204-4963-A636-7D0B28EFFD0B;54B837B9-AC1F-462F-892A-66A5767F25A6	Not Available;Not Available;Not Available	1;1;1	Not Available;Not Available;Not Available	104;104;104	Leucovorin;Fluorouracil;Oxaloplatin	Not Applicable;Not Applicable;Not Applicable	7;7;7	Not Available;Not Available;Not Available	Not Available;Not Available;Not Available	Not Available;Not Available;Not Available	Not Available;Not Available;Not Available	Not Applicable;Not Applicable;Not Applicable	Not Available;Not Available;Not Available	Not Available;Not Available;Not Available	YES;YES;YES	Chemotherapy;Chemotherapy;Chemotherapy
TCGA-VQ-AA6J	MALE	838	Stomach, Intestinal Adenocarcinoma, Not Otherwise Specified (NOS)	Stomach	Alive	T4a	N2	M0	Stage IIIB	G3	0	838			TUMOR FREE		75	Cardia/Proximal	Not Available	NO	Not Available	No	TCGA-VQ-AA6J	A267DDB4-B2D9-4292-B120-6E13E70D01F8	Barretos	Sao Paulo	10	-27506	Not Applicable	0	642
TCGA-BR-A4J4	MALE	16	Stomach, Adenocarcinoma, Not Otherwise Specified (NOS)	Stomach	Alive	T4a	N2	M0	Stage IIIB	G3	0	16			TUMOR FREE		39	Antrum/Distal	Not Available	Not Available	Not Available	No	TCGA-BR-A4J4	8A24F1A3-4BAB-4591-9676-7BEE01D096C1	Hanoi	Vietnam	7	-14459	Not Applicable	0	16
TCGA-CG-5722	FEMALE	30	Stomach, Intestinal Adenocarcinoma, Not Otherwise Specified (NOS)	Stomach	Alive	T3	N2	M1	Stage IV	G3	0	30			WITH TUMOR		67	Fundus/Body	Not Available	YES	Proton Pump Inhibitors	No	TCGA-CG-5722	f35e8fef-f61d-4614-b73f-f7e1d0f21f52	Hamburg	Hamburg/Germany	22	-24472	Not Applicable	0	30
TCGA-CG-5716	MALE	0	Stomach, Adenocarcinoma, Not Otherwise Specified (NOS)	Stomach	Alive	T4a	N2	M1	Stage IV	G2	0	0			WITH TUMOR		86	Antrum/Distal	Not Available	Not Available	Not Available	Not Available	TCGA-CG-5716	49587564-e30f-4f1c-b7b3-fc0989bb1a0a	Hamburg	Germany	7	-31411	Not Applicable	0	0
TCGA-CD-A48A	MALE	378	Stomach, Adenocarcinoma, Not Otherwise Specified (NOS)	Stomach	Alive	T3	N0	M0	Stage IIA	G2	0	378			TUMOR FREE		57	Cardia/Proximal	Not Available	Not Available	Not Available	Not Available	TCGA-CD-A48A	A6635058-4498-463C-9BBC-1009DDA3308C	Not Available	Not Available	11	-20839	Not Applicable	0	4	TCGA-CD-A48A-D69717	93546A16-CBD8-4220-9E86-B1D23E230E72	Not Available	16	66	38	Capecitabine	Complete Response	1	Not Available	Not Available	Not Available	Not Available	Not Applicable	Not Available	Not Available	NO	Chemotherapy
TCGA-D7-A747	MALE	255	Stomach, Adenocarcinoma, Diffuse Type	Stomach	Dead	T3	N1	M0	Stage IIB	G3	1				WITH TUMOR		57	Antrum/Distal	Not Available	NO	Not Available	Unknown	TCGA-D7-A747	37F93D19-C78F-4FBC-AFFB-5A2CCC84BE1B	poznan	wlkp	7	-20923	255	0	Not Available	TCGA-D7-A747-D58326;TCGA-D7-A747-D61636;TCGA-D7-A747-D61639	329B574E-FD62-402C-BAB1-1B86157ABB42;4A0774C6-70B3-4A03-8DE5-46E3F0FEC975;19AF3680-BE81-43D4-9667-36FA05D0F8AB	Not Available;Not Available;Not Available	7;2;2	208;208;208	85;85;85	epirubicinum;Cisplatinum;Capecytabinum	Clinical Progressive Disease;Clinical Progressive Disease;Clinical Progressive Disease	4;7;7	Not Available;Not Available;Not Available	Not Available;Not Available;Not Available	Not Available;Not Available;Not Available	Not Available;Not Available;Not Available	Not Applicable;Not Applicable;Not Applicable	Not Available;Not Available;Not Available	Not Available;Not Available;Not Available	NO;NO;NO	Chemotherapy;Chemotherapy;Chemotherapy
TCGA-BR-8676	MALE	229	Stomach, Intestinal Adenocarcinoma, Not Otherwise Specified (NOS)	Stomach	Alive	T3	N3a	M0	Stage IIIB	G3	0	229			TUMOR FREE		59	Antrum/Distal	Not Available	Unknown	Not Available	No	TCGA-BR-8676	b604b620-cd32-4c87-ace3-00a68ab16973	Kiev	Ukraine	11	-21619	Not Applicable	0	27
TCGA-VQ-A8PE	MALE	675	Stomach, Intestinal Adenocarcinoma, Tubular Type	Stomach	Dead	T3	N3a	M0	Stage IIIB	G3	1	265		Locoregional Recurrence	WITH TUMOR		78	Cardia/Proximal	Not Available	NO	Not Available	No	TCGA-VQ-A8PE	32B1F9FF-DBAD-47F5-9580-13F4120F5891	Barretos	Sao Paulo	30	-28755	Not Applicable	0	422
TCGA-HF-7132	MALE	2351	Stomach, Intestinal Adenocarcinoma, Mucinous Type	Stomach	Alive	T2b	N1	M0	Stage II	G2	0	2351			TUMOR FREE		Not Available	Antrum/Distal	Not Available	NO	Not Available	No	TCGA-HF-7132	6c3687fd-0761-477d-95ab-73e11d66dbd6	London	Ontario Canada	17	Not Available	Not Applicable	Not Available	Not Available	TCGA-HF-7132-D19149;TCGA-HF-7132-D18988;TCGA-HF-7132-D71171	bf9ab4ae-7a81-4b17-92ca-da04056812ec;6c7c0974-bacc-44ca-a3cf-1990f0fc312a;D0BDFBB9-91FB-450C-92EA-23200E973F03	Not Available;Not Available;Not Available	17;17;19	Not Available;Not Available;208	Not Available;Not Available;75	Fluorouracil;Leucovorin;Fluorouracil	Not Available;Not Available;Unknown	11;11;3	05;05;Not Available	3785;180;Not Available	mg;mg;Not Available	ADJUVANT;ADJUVANT;Not Available	Not Applicable;Not Applicable;Not Applicable	01;01;Not Available	IV;IV;Not Available	NO;NO;NO	Chemotherapy;Chemotherapy;Chemotherapy
TCGA-HF-A5NB	FEMALE	928	Stomach, Intestinal Adenocarcinoma, Mucinous Type	Stomach	Alive	T4a	N3a	M0	Stage IIIC	G3	0	928			TUMOR FREE		75	Antrum/Distal	Not Available	NO	Not Available	No	TCGA-HF-A5NB	A58B6CD2-48F8-47D0-B97A-02A376F83E5C	London	Ontario	26	-27676	Not Applicable	Not Available	550	TCGA-HF-A5NB-D49160	03D7E595-62F0-4FAB-94D9-EDA14C9B93A8	Not Available	26	207	77	Fluorouracil	Unknown	9	Not Available	Not Available	Not Available	Not Available	Not Applicable	Not Available	Not Available	NO	Chemotherapy
TCGA-BR-7851	MALE	574	Stomach, Intestinal Adenocarcinoma, Not Otherwise Specified (NOS)	Stomach	Dead	T4a	N0	M0	Stage IIB	G3	0	574			TUMOR FREE		74	Fundus/Body	Not Available	Not Available	Not Available	Not Available	TCGA-BR-7851	08c73b36-ede5-4136-b73b-0e964d432f89	Tver	Russia	20	-27091	Not Applicable	0	30
TCGA-D7-8573	MALE	593	Stomach, Intestinal Adenocarcinoma, Tubular Type	Stomach	Alive	T3	N0	M0	Stage IIA	G3	1				TUMOR FREE		57	Fundus/Body	Not Available	NO	Not Available	No	TCGA-D7-8573	e4344668-5a50-4dde-8eec-f4d7f01f99fd	poznan	Poland	23	-20963	Not Applicable	0	119
TCGA-D7-8572	MALE	511	Stomach, Adenocarcinoma, Not Otherwise Specified (NOS)	Stomach	Alive	T2	N2	M0	Stage IIB	G2	1				TUMOR FREE		57	Fundus/Body	Not Available	NO	Not Available	Unknown	TCGA-D7-8572	8097fddc-c7b9-4192-89d7-6bcceb7465b5	Poznan	Poland	23	-20870	Not Applicable	0	26
TCGA-CD-A4MG	MALE	200	Stomach, Adenocarcinoma, Diffuse Type	Stomach	Dead	T3	N0	M0	Stage IIA	G3	1	74		Locoregional Recurrence	TUMOR FREE		76	Cardia/Proximal	Not Available	Not Available	Not Available	Not Available	TCGA-CD-A4MG	028632ED-D75A-49BB-B579-41962BA502FE	Not Available	Not Available	13	-28019	Not Applicable	0	2
TCGA-BR-8289	MALE	81	Stomach, Intestinal Adenocarcinoma, Not Otherwise Specified (NOS)	Stomach	Dead	T4	N3a	M1	Stage IV	G3	0	81			TUMOR FREE		57	Fundus/Body	Not Available	Unknown	Unknown	Unknown	TCGA-BR-8289	889cb779-36a5-4ac6-b2cf-ea7be0cc387d	Tver	Russia	7	-20849	Not Applicable	0	8
TCGA-BR-8589	MALE	825	Stomach, Adenocarcinoma, Not Otherwise Specified (NOS)	Stomach	Alive	T4b	N1	M0	Stage IIIB	G3	0	825			TUMOR FREE		56	Fundus/Body	Not Available	Not Available	Not Available	Unknown	TCGA-BR-8589	a1867d3e-a006-4e04-8118-478792bdca4b	Tver	Russia	31	-20727	Not Applicable	0	58
TCGA-CG-4440	FEMALE	122	Stomach, Intestinal Adenocarcinoma, Not Otherwise Specified (NOS)	Stomach	Dead	T3	N3	M1	Stage IV	G3	0	122			Not Available		68	Fundus/Body	Not Available	Not Available	Not Available	Not Available	TCGA-CG-4440	8ca597db-ac21-43d1-9329-586b2eaf6982	Hamburg	Germany	22	-25171	122	0	Not Available
TCGA-BR-A4J8	FEMALE	411	Stomach, Adenocarcinoma, Not Otherwise Specified (NOS)	Stomach	Alive	T3	N3a	M0	Stage IIIB	G3	0	411			TUMOR FREE		71	Cardia/Proximal	Not Available	NO	Not Available	No	TCGA-BR-A4J8	1EB2038D-3B4F-4DA2-964B-E629EA068215	Kiev	Not Available	8	-26048	Not Applicable	0	7	TCGA-BR-A4J8-D51399	250C42A3-9507-42DD-B09A-16E3FAAC1A9E	Not Available	18	77	65	Xeloda	Complete Response	11	Not Available	Not Available	Not Available	Not Available	Not Applicable	Not Available	Not Available	NO	Chemotherapy
TCGA-BR-6705	FEMALE	779	Stomach, Adenocarcinoma, Not Otherwise Specified (NOS)	Stomach	Dead	T3	N3a	M0	Stage IIIB	G3	1				TUMOR FREE		68	Fundus/Body	Not Available	Not Available	Not Available	Not Available	TCGA-BR-6705	b14f2fcb-e869-475e-bc7c-adaf6e7e636f	Kiev	Ukraine	23	-25073	Not Applicable	0	53
TCGA-CG-5718	FEMALE	1095	Stomach, Intestinal Adenocarcinoma, Not Otherwise Specified (NOS)	Stomach	Dead	T2b	N1	M0	Stage II	G2	0	1095			TUMOR FREE		78	Fundus/Body	Not Available	Not Available	Not Available	No	TCGA-CG-5718	d5c58161-05ed-4472-81ed-176216f49929	Hamburg	Germany	22	-28763	Not Applicable	0	31
TCGA-BR-A4QI	FEMALE	652	Stomach, Adenocarcinoma, Not Otherwise Specified (NOS)	Stomach	Dead	T3	N0	M0	Stage IIA	G3	1	383	Non-regional / Distant Lymph Nodes	Distant Metastasis	TUMOR FREE		70	Antrum/Distal	Not Available	NO	Not Available	No	TCGA-BR-A4QI	8BB9CFD8-7012-41B1-8AA1-B6592B0C0D43	Kiev	Not Available	19	-25928	Not Applicable	0	15	TCGA-BR-A4QI-D51448;TCGA-BR-A4QI-D51449;TCGA-BR-A4QI-D51450;TCGA-BR-A4QI-D66455;TCGA-BR-A4QI-D66456;TCGA-BR-A4QI-D66457	95742FF3-4373-4FA6-9238-8EA5710150E0;E985089E-25FA-4999-9225-9DF5C938C444;144A0394-2BB9-41DF-90C6-AC3197DBAFC9;899F037D-B548-4CB9-B8F2-27231B13F601;D5539FD8-CD62-4E80-B376-1B7C3A341BF7;9F1F2449-F67D-48B0-B24E-02408C00666A	Not Available;Not Available;Not Available;Not Available;Not Available;Not Available	19;19;19;15;15;15	Not Available;Not Available;Not Available;551;551;551	383;383;383;383;383;383	5-Fluorouracil;Leucovorin;Etoposide;5-Fluorouracil;Leucovorin;Etoposide	Not Applicable;Not Applicable;Not Applicable;Clinical Progressive Disease;Clinical Progressive Disease;Clinical Progressive Disease	11;11;11;10;10;10	Not Available;Not Available;Not Available;Not Available;Not Available;Not Available	Not Available;Not Available;Not Available;Not Available;Not Available;Not Available	Not Available;Not Available;Not Available;Not Available;Not Available;Not Available	Not Available;Not Available;Not Available;Not Available;Not Available;Not Available	Not Applicable;Not Applicable;Not Applicable;Not Applicable;Not Applicable;Not Applicable	Not Available;Not Available;Not Available;Not Available;Not Available;Not Available	Not Available;Not Available;Not Available;Not Available;Not Available;Not Available	YES;YES;YES;NO;NO;NO	Chemotherapy;Ancillary;Chemotherapy;Chemotherapy;Ancillary;Chemotherapy
TCGA-BR-8059	MALE	439	Stomach, Intestinal Adenocarcinoma, Not Otherwise Specified (NOS)	Stomach	Dead	T4	N1	M0	Stage III	G3	0	439			TUMOR FREE		72	Fundus/Body	Not Available	Unknown	Unknown	Unknown	TCGA-BR-8059	bae3c762-d894-4742-860c-43d18659b4bc	Tver	Russia	9	-26474	Not Applicable	0	25
TCGA-CD-A4MI	MALE	358	Stomach, Adenocarcinoma, Not Otherwise Specified (NOS)	Stomach	Dead	T3	N1	M0	Stage IIIA	G1	1	271		Locoregional Recurrence	TUMOR FREE		62	Antrum/Distal	Not Available	Not Available	Not Available	Not Available	TCGA-CD-A4MI	CDA6D95C-BE6A-485E-BA9A-C57F3EB3F99A	Not Available	Not Available	13	-22721	Not Applicable	0	3
TCGA-R5-A7ZR	FEMALE	185	Stomach, Intestinal Adenocarcinoma, Tubular Type	Stomach	Dead	T3	NX	M0	Stage III	G2	0	185			WITH TUMOR		70	Fundus/Body	Not Available	Not Available	Not Available	No	TCGA-R5-A7ZR	E04A05EE-F0D8-4691-84BB-D1A61E1BD77B	Houston	Texas	24	-25795	185	0	Not Available
TCGA-BR-A453	MALE	185	Stomach Adenocarcinoma, Signet Ring Type	Stomach	Dead	T4a	N3a	M1	Stage IV	G3	0	185			TUMOR FREE		51	Antrum/Distal	Not Available	NO	Not Available	No	TCGA-BR-A453	1A1D4702-254B-4FFF-9609-182442EDB83E	Hanoi	Vietnam	6	-18988	Not Applicable	0	92
TCGA-VQ-A8PB	FEMALE	1043	Stomach, Intestinal Adenocarcinoma, Papillary Type	Stomach	Dead	T3	N0	M0	Stage II	G2	0	1043			TUMOR FREE		65	Antrum/Distal	Not Available	NO	Not Available	No	TCGA-VQ-A8PB	02661985-D13F-4007-9A42-5E08D1A6CA10	Barretos	Sao Paulo	26	-23927	Not Applicable	0	1023	TCGA-VQ-A8PB-D64339	D5460FEE-2114-400B-A562-20B3220DCE89	Not Available	28	273	63	Fluorouracil	Complete Response	8	Not Available	Not Available	Not Available	Not Available	Not Applicable	Not Available	Not Available	NO	Chemotherapy
TCGA-HU-A4GX	FEMALE	616	Stomach, Adenocarcinoma, Diffuse Type	Stomach	Alive	T4b	N2	M0	Stage IIIC	G3	0	616			TUMOR FREE		70	Antrum/Distal	Not Available	Unknown	Not Available	No	TCGA-HU-A4GX	75915370-0895-4933-8875-8A31C65C3D50	Daegu	Not Available	11	-25913	Not Applicable	0	310	TCGA-HU-A4GX-D42598;TCGA-HU-A4GX-D42599	8AC674A8-6EE9-438E-B986-8153087EDB30;DA2BC0A9-5B0F-41FB-B4CF-23F58CAE64C2	Not Available;Not Available	26;26	48;48	48;48	Taxol;CDDP	Clinical Progressive Disease;Clinical Progressive Disease	4;4	Not Available;Not Available	Not Available;Not Available	Not Available;Not Available	Not Available;Not Available	Not Applicable;Not Applicable	Not Available;Not Available	Not Available;Not Available	NO;NO	Chemotherapy;Chemotherapy
TCGA-VQ-A8E7	MALE	1138	Stomach, Intestinal Adenocarcinoma, Tubular Type	Stomach	Alive	T3	N1	M1	Stage IV	G2	1	1048	Other, specify	Distant Metastasis	WITH TUMOR		59	Gastroesophageal Junction	Not Available	NO	Not Available	No	TCGA-VQ-A8E7	7DA1A098-73F7-40C1-8C9D-E0423C15009C	Barretos	Sao Paulo	20	-21664	Not Applicable	0	787
TCGA-BR-8058	FEMALE	1133	Stomach, Adenocarcinoma, Not Otherwise Specified (NOS)	Stomach	Alive	T4a	N2	M0	Stage IIIB	G3	1	89	Other, specify	New Primary Tumor	TUMOR FREE		53	Antrum/Distal	Not Available	Not Available	Not Available	Not Available	TCGA-BR-8058	4685dc14-1809-47ea-aba9-9bde72f6661b	Tver	Russia	2	-19658	Not Applicable	0	35
TCGA-VQ-A8P2	MALE	1160	Stomach, Intestinal Adenocarcinoma, Mucinous Type	Stomach	Alive	T4a	N1	M0	Stage IIIA	G2	0	1160			TUMOR FREE		68	Fundus/Body	Not Available	NO	Not Available	No	TCGA-VQ-A8P2	A0D35A25-3500-46F3-874F-1A0820200473	Barretos	Sao Paulo	26	-25129	Not Applicable	0	680	TCGA-VQ-A8P2-D64331	31794DDC-9E61-4210-9C6D-3F4A79A87CD0	Not Available	28	107	Not Available	Not Available	Complete Response	8	Not Available	Not Available	Not Available	Not Available	Not Applicable	Not Available	Not Available	NO	Chemotherapy
TCGA-HU-8249	MALE	881	Stomach, Intestinal Adenocarcinoma, Tubular Type	Stomach	Alive	T3	N2	M0	Stage IIIA	G2	0	881			TUMOR FREE		76	Fundus/Body	Not Available	Unknown	Not Available	No	TCGA-HU-8249	e302f643-eed3-4f07-a7fb-c32ee2031a1c	Pusan	Not Available	17	-28012	Not Applicable	0	431	TCGA-HU-8249-D42416	7F56CD5D-86E2-4D92-8925-DDCC98650C78	Not Available	26	286	27	Xeloda	Complete Response	4	Not Available	Not Available	Not Available	Not Available	Not Applicable	Not Available	Not Available	NO	Chemotherapy
TCGA-BR-4257	FEMALE	294	Stomach, Adenocarcinoma, Not Otherwise Specified (NOS)	Stomach	Dead	TX	NX	M0		G2	0	294			Not Available		79	Antrum/Distal	Not Available	NO	Not Available	Not Available	TCGA-BR-4257	da112431-5579-4fd1-a230-9144b359b0e9	Kazan	Russia	6	-29014	Not Applicable	0	0
TCGA-D7-A6EV	FEMALE	342	Stomach, Adenocarcinoma, Not Otherwise Specified (NOS)	Stomach	Alive	T2	N2	M0	Stage IIB	G3	0	342			TUMOR FREE		71	Antrum/Distal	Not Available	NO	Not Available	No	TCGA-D7-A6EV	72B10481-7B16-469F-B133-464609569ADF	poznan	wlkp	28	-26226	Not Applicable	0	342
TCGA-BR-6564	FEMALE	794	Stomach, Adenocarcinoma, Diffuse Type	Stomach	Dead	T3	N2	M0	Stage IIIA	G3	0	794			TUMOR FREE		46	Fundus/Body	Not Available	Not Available	Not Available	Not Available	TCGA-BR-6564	af1086cc-b330-4ad6-ae1c-3b5c7259949a	Tver	Russia	23	-17129	Not Applicable	0	25
TCGA-CD-A489	MALE	344	Stomach, Adenocarcinoma, Diffuse Type	Stomach	Dead	T3	N0	M0	Stage IIA	G3	1	277		Locoregional Recurrence	TUMOR FREE		58	Antrum/Distal	Not Available	Not Available	Not Available	Not Available	TCGA-CD-A489	7F056FC5-3848-4884-9644-95B8B6ED9642	Not Available	Not Available	11	-21517	Not Applicable	0	4
TCGA-BR-A4IV	MALE	869	Stomach, Adenocarcinoma, Diffuse Type	Stomach	Dead	T4a	N2	M0	Stage IIIB	G3	1	737		Locoregional Recurrence	TUMOR FREE		47	Antrum/Distal	Not Available	NO	Not Available	No	TCGA-BR-A4IV	30425882-20D7-47ED-9630-60977BA62C72	Hanoi	Vietnam	8	-17515	Not Applicable	0	28	TCGA-BR-A4IV-D48374;TCGA-BR-A4IV-D48375;TCGA-BR-A4IV-D48376;TCGA-BR-A4IV-D48379	9607C0FC-B41D-4206-AF5A-1D07B21ED651;088714CC-ACF2-45A6-9333-D17F30500A7D;44223653-15E7-4147-A96F-D94FC6087DD3;B93DFA57-F320-4EAB-A63C-729C88CF3EFD	Not Available;Not Available;Not Available;Not Available	12;12;12;12	166;166;166;166	51;51;51;51	Oxaliplatin;Epirubicin;Xeloda;Dexamethasone	Complete Response;Complete Response;Complete Response;Complete Response	9;9;9;9	Not Available;Not Available;Not Available;Not Available	Not Available;Not Available;Not Available;Not Available	Not Available;Not Available;Not Available;Not Available	Not Available;Not Available;Not Available;Not Available	Not Applicable;Not Applicable;Not Applicable;Not Applicable	Not Available;Not Available;Not Available;Not Available	Not Available;Not Available;Not Available;Not Available	NO;NO;NO;NO	Chemotherapy;Chemotherapy;Chemotherapy;Ancillary
TCGA-BR-8487	FEMALE	34	Stomach, Adenocarcinoma, Not Otherwise Specified (NOS)	Stomach	Alive	T3	N0	M0	Stage IIA	G3	0	34			TUMOR FREE		64	Antrum/Distal	Not Available	Not Available	Not Available	No	TCGA-BR-8487	bd2a14e7-bb30-48d0-a585-7fbab767d4cf	Kiev	Ukraine	11	-23400	Not Applicable	0	21
TCGA-IN-A6RP	MALE	196	Stomach, Adenocarcinoma, Not Otherwise Specified (NOS)	Stomach	Alive	T1b	N3	M0		G3	1	150	Liver	Distant Metastasis	WITH TUMOR		63	Gastroesophageal Junction	Not Available	Unknown	Not Available	Unknown	TCGA-IN-A6RP	DBC29B1B-42B8-4249-A1D1-3BA117EFEA43	Marietta	Ohio	10	-23282	Not Applicable	0	196	TCGA-IN-A6RP-D57381;TCGA-IN-A6RP-D57382	60589C8E-4B78-4EBC-9458-E817FA9CA244;57DACD9C-C962-4EAF-BD41-E616BA1C8584	Not Available;Not Available	10;10	Not Available;Not Available	79;79	Irinotecan;Cisplatin	Clinical Progressive Disease;Clinical Progressive Disease	3;3	Not Available;Not Available	Not Available;Not Available	Not Available;Not Available	Not Available;Not Available	Not Applicable;Not Applicable	Not Available;Not Available	Not Available;Not Available	YES;YES	Chemotherapy;Chemotherapy
TCGA-BR-4279	MALE	291	Stomach, Adenocarcinoma, Not Otherwise Specified (NOS)	Stomach	Dead	T2a	N1	M0	Stage II	G3	0	291			Not Available		43	Not Available	Not Available	NO	Not Available	Not Available	TCGA-BR-4279	117eb38b-0c62-4336-a866-fa5bd013256a	Ryazan	Russia	13	-16065	Not Applicable	0	0	TCGA-BR-4279-D28736;TCGA-BR-4279-D28739;TCGA-BR-4279-D28738;TCGA-BR-4279-D28737	B9FA89E8-EABF-40BC-BA99-A5C8C3998E1B;B5657D71-90E2-4C17-BC26-67252AFE9687;0AE895CA-CC2E-4609-9227-679397E29B30;6DAA089B-8DBA-47DB-8389-9B6902193F22	Not Available;Not Available;Not Available;Not Available	29;29;29;29	115;115;115;115	27;27;27;27	Docetaxel;5-Fluorouracil;Leucovorin;Cisplatin	Not Available;Not Available;Not Available;Not Available	2;2;2;2	3;3;3;3	40;400;400;40	mg/m2;mg/m2/day;mg/m2;mg/m2	ADJUVANT;ADJUVANT;ADJUVANT;ADJUVANT	Not Applicable;Not Applicable;Not Applicable;Not Applicable	1;1;1;1	IV;IV;IV;IV	NO;NO;NO;NO	Chemotherapy;Chemotherapy;Chemotherapy;Chemotherapy
TCGA-BR-8687	FEMALE	250	Stomach, Adenocarcinoma, Not Otherwise Specified (NOS)	Stomach	Dead	T4b	N2	M0	Stage IIIC	G3	1				WITH TUMOR		67	Cardia/Proximal	Not Available	Not Available	Not Available	Unknown	TCGA-BR-8687	621411ee-c1f2-4da4-b1c0-cbe0936060f6	Tver	Russia	31	-24472	Not Applicable	0	19
TCGA-HU-A4H2	FEMALE	394	Stomach, Intestinal Adenocarcinoma, Tubular Type	Stomach	Alive	T3	N3b	M0	Stage IIIB	G2	0	394			TUMOR FREE		58	Antrum/Distal	Not Available	NO	Not Available	No	TCGA-HU-A4H2	7B594344-573D-46A0-B735-6727F6F15585	Seoul	Not Available	10	-21496	Not Applicable	0	394
TCGA-CD-8527	FEMALE	218	Stomach, Intestinal Adenocarcinoma, Not Otherwise Specified (NOS)	Stomach	Dead	T2	N1	M0	Stage II	G2	1	159	Lung	Distant Metastasis	TUMOR FREE		72	Antrum/Distal	Not Available	Not Available	Not Available	Not Available	TCGA-CD-8527	1b98b2da-c5bf-422f-bb73-1190841fbec4	Not Available	Not Available	15	-26503	Not Applicable	0	2	TCGA-CD-8527-D70970;TCGA-CD-8527-D70971;TCGA-CD-8527-D70972	D1EC9F9F-DA05-4C23-9F29-CF23F24E2BA5;021DEDAC-5385-4644-935D-112C0C381E33;B1D55FC2-A4E7-4619-BABD-0859F68D7C4D	Not Available;Not Available;Not Available	11;11;11	60;60;60	34;34;34	Epirubicin;Cisplatin;Capecitabine	Clinical Progressive Disease;Clinical Progressive Disease;Clinical Progressive Disease	3;3;3	Not Available;Not Available;Not Available	Not Available;Not Available;Not Available	Not Available;Not Available;Not Available	Not Available;Not Available;Not Available	Not Applicable;Not Applicable;Not Applicable	Not Available;Not Available;Not Available	Not Available;Not Available;Not Available	NO;NO;NO	Chemotherapy;Chemotherapy;Chemotherapy
TCGA-IN-A6RL	MALE	406	Stomach, Adenocarcinoma, Not Otherwise Specified (NOS)	Stomach	Dead	T2	N1	M0		G2	1	307		Distant Metastasis	TUMOR FREE		84	Gastroesophageal Junction	Not Available	Unknown	Not Available	Unknown	TCGA-IN-A6RL	D8DAF273-5334-4BE0-B9E0-CC0004552544	Everett	Pennsylvania	10	-30783	Not Applicable	0	158
TCGA-VQ-A91N	FEMALE	570	Stomach, Intestinal Adenocarcinoma, Tubular Type	Stomach	Dead	T4	N3	M0	Stage IV	G2	1	438		Locoregional Recurrence	WITH TUMOR		59	Antrum/Distal	Not Available	NO	Not Available	No	TCGA-VQ-A91N	CBE05333-3185-4878-B6E6-977A0E1400E4	Barretos	Sao Paulo	23	-21753	570	0	Not Available	TCGA-VQ-A91N-D66745	159F25A1-0142-455B-A134-A89B2C4BC995	Not Available	23	219	98	Fluorouracil	Clinical Progressive Disease	10	Not Available	Not Available	Not Available	Not Available	Not Applicable	Not Available	Not Available	NO	Chemotherapy
TCGA-BR-8384	MALE	113	Stomach, Adenocarcinoma, Not Otherwise Specified (NOS)	Stomach	Alive	T4b	N2	M0	Stage IIIC	G3	0	113			TUMOR FREE		69	Antrum/Distal	Not Available	Unknown	Not Available	Unknown	TCGA-BR-8384	698a89d8-b4bc-48a8-80af-8414dbacf327	Kiev	Ukraine	17	-25281	Not Applicable	0	21
TCGA-CG-4437	MALE	245	Stomach, Intestinal Adenocarcinoma, Not Otherwise Specified (NOS)	Stomach	Alive	T2	N1	M0	Stage II	G2	0	245			TUMOR FREE		83	Cardia/Proximal	Not Available	Not Available	Not Available	Not Available	TCGA-CG-4437	6244e506-d163-4d34-8fec-6158191679cb	Hamburg	Germany	22	-30467	Not Applicable	0	245
TCGA-BR-8361	FEMALE	946	Stomach, Adenocarcinoma, Not Otherwise Specified (NOS)	Stomach	Alive	T4b	N2	M0	Stage IIIC	G3	0	946			TUMOR FREE		71	Fundus/Body	Not Available	Unknown	Not Available	Not Available	TCGA-BR-8361	86cbca52-29bd-4b88-a203-e8b9a072bd4b	Tver	Russia	17	-25999	Not Applicable	0	12
TCGA-VQ-A8PS	MALE	406	Stomach, Intestinal Adenocarcinoma, Not Otherwise Specified (NOS)	Stomach	Dead	T3	N1	M0	Stage IIIA	G2	1	131	Liver	Distant Metastasis	WITH TUMOR		76	Other (please specify)	Gastric stump	NO	Not Available	No	TCGA-VQ-A8PS	1F505FFA-B551-44A5-8813-C44C2BFCB4D5	Barretos	Sao Paulo	30	-28035	406	0	Not Available
TCGA-ZQ-A9CR	FEMALE	24	Stomach, Intestinal Adenocarcinoma, Tubular Type	Stomach	Dead	T4a	N3	MX	Stage IIIC	G3	0	24			Unknown		79	Antrum/Distal	Not Available	YES	Proton Pump Inhibitors	No	TCGA-ZQ-A9CR	F76122F7-343A-4345-9FB6-E46AD0B75CB0	Dundee	Scotland	30	-29107	24	0	Not Available
TCGA-R5-A804	MALE	140	Stomach, Adenocarcinoma, Diffuse Type	Stomach	Dead	T3	N2	M1	Stage IV	G3	0	140			WITH TUMOR		54	Stomach (NOS)	Not Available	YES	Proton Pump Inhibitors	No	TCGA-R5-A804	17722000-AB3C-4B58-979F-EDAA3CA46E3C	Not Available	Not Available	24	-20026	140	0	Not Available
TCGA-BR-6458	FEMALE	588	Stomach, Adenocarcinoma, Not Otherwise Specified (NOS)	Stomach	Dead	T3	N1	M0	Stage IIB	G3	1	574	Other, specify	Distant Metastasis	TUMOR FREE		57	Fundus/Body	Not Available	Not Available	Not Available	Not Available	TCGA-BR-6458	e516880b-c4e5-43cd-a358-be0db88564d7	Kiev	Ukraine	21	-21069	Not Applicable	0	41	TCGA-BR-6458-D30862;TCGA-BR-6458-D30863;TCGA-BR-6458-D30864	329B1450-1CBA-4CF7-A0A2-F6EA2E19F46C;2CE0589D-6B0E-40B9-98B7-8CDD365F4C80;843BC274-766C-438D-8603-FD34A0DD704A	Not Available;Not Available;Not Available	17;17;17	167;167;98	58;58;58	5-Fluorouracil;Leucovorin;Etoposide	Complete Response;Complete Response;Complete Response	4;4;4	Not Available;Not Available;Not Available	Not Available;Not Available;Not Available	Not Available;Not Available;Not Available	Not Available;Not Available;Not Available	Not Applicable;Not Applicable;Not Applicable	Not Available;Not Available;Not Available	Not Available;Not Available;Not Available	NO;NO;NO	Chemotherapy;Ancillary;Chemotherapy
TCGA-VQ-AA64	MALE	560	Stomach, Intestinal Adenocarcinoma, Not Otherwise Specified (NOS)	Stomach	Dead	T3	N2	M0	Stage IIIB	G2	0	560			WITH TUMOR		68	Cardia/Proximal	Not Available	NO	Not Available	No	TCGA-VQ-AA64	FB143117-C3AD-4F4B-8F39-7586279E8EAA	Barretos	Sao Paulo	26	-25109	560	0	Not Available	TCGA-VQ-AA64-D64673	B6EE592E-F365-4CB9-9AB4-A2BC1D21D202	Not Available	9	192	73	Fluorouracil	Complete Response	9	Not Available	Not Available	Not Available	Not Available	Not Applicable	Not Available	Not Available	NO	Chemotherapy
TCGA-D7-5577	FEMALE	782	Stomach, Intestinal Adenocarcinoma, Tubular Type	Stomach	Dead	T2	N3	M0	Stage IIIA	G2	1	376	Other, specify	Locoregional Recurrence	TUMOR FREE		53	Cardia/Proximal	Not Available	Not Available	Not Available	No	TCGA-D7-5577	2dc154aa-c478-404b-a92e-86abcc8dbdb7	Poznan	Poland	8	-19668	Not Applicable	0	263	TCGA-D7-5577-D13821;TCGA-D7-5577-D64886;TCGA-D7-5577-D64887;TCGA-D7-5577-D64888	eddf6027-36e4-4eb1-b4ab-59e0455453b9;98146EC0-9226-4EF2-8DFA-743CB1624292;651EAE70-461F-4656-8059-B1C08352CA23;6DFABED0-E03E-4089-8102-46E2AB77A61F	Not Available;Not Available;Not Available;Not Available	20;15;15;15	Not Available;Not Available;Not Available;Not Available	81;81;81;81	Calcium Foliatum;cisplatinum;epirubicinum;fluorouracilum	Not Available;Not Applicable;Not Applicable;Not Applicable	6;9;9;9	Not Available;Not Available;Not Available;Not Available	420;Not Available;Not Available;Not Available	mg;Not Available;Not Available;Not Available	ADJUVANT;Not Available;Not Available;Not Available	Not Applicable;Not Applicable;Not Applicable;Not Applicable	PLFE;Not Available;Not Available;Not Available	IV;Not Available;Not Available;Not Available	YES;YES;YES;YES	Chemotherapy;Chemotherapy;Chemotherapy;Chemotherapy
TCGA-FP-A9TM	MALE	189	Stomach, Adenocarcinoma, Not Otherwise Specified (NOS)	Stomach	Alive	T1b	N1	M0		G2	0	189			TUMOR FREE		77	Gastroesophageal Junction	Not Available	YES	Proton Pump Inhibitors	No	TCGA-FP-A9TM	36ABEAF9-CC0F-43DD-9C55-B9347D826529	Tyler	Texas	16	-28376	Not Applicable	0	189	TCGA-FP-A9TM-D72124;TCGA-FP-A9TM-D72125	D440BC94-9385-41B6-9453-459F1BDD926D;7B0A2628-C09F-4800-8785-084F66AB61C3	Not Available;Not Available	16;16	142;142	110;110	5-FU;Leucovorin	Complete Response;Complete Response	4;4	Not Available;Not Available	Not Available;Not Available	Not Available;Not Available	Not Available;Not Available	Not Applicable;Not Applicable	Not Available;Not Available	Not Available;Not Available	NO;NO	Chemotherapy;Ancillary
TCGA-MX-A663	MALE	300	Stomach, Adenocarcinoma, Not Otherwise Specified (NOS)	Stomach	Dead	T3	N0	M0	Stage IIA	G3	1	218	Other, specify	Distant Metastasis	TUMOR FREE		66	Stomach (NOS)	Remnant gastrectomy after Billroth	NO	Not Available	No	TCGA-MX-A663	E9D0AA8B-9EF4-40F7-8254-38FDCE349BEE	New York	New York	6	-24421	Not Applicable	0	131
TCGA-BR-6563	MALE	1190	Stomach, Adenocarcinoma, Not Otherwise Specified (NOS)	Stomach	Alive	T3	N1	M0	Stage IIB	G3	1	148		New Primary Tumor	TUMOR FREE		60	Antrum/Distal	Not Available	Not Available	Not Available	Not Available	TCGA-BR-6563	9d7305be-60a3-4ecf-856a-bd5321166590	Tver	Russia	23	-21936	Not Applicable	0	26	TCGA-BR-6563-D40649;TCGA-BR-6563-D40651;TCGA-BR-6563-D40653;TCGA-BR-6563-D40655	CF9D5B5A-E824-42E3-83D0-12C88C7F9F78;85F8652E-5C14-44F8-9F42-1BEB7FEF8158;84F5091F-4FCF-49AF-984B-902DEF77524F;D97E90FB-801B-458A-8FB0-768EC4B13B19	Not Available;Not Available;Not Available;Not Available	26;26;26;26	330;330;330;330	157;157;157;157	Doxorubicin;Cyclophosphane;Vincristine;Dacarbazine	Complete Response;Complete Response;Complete Response;Complete Response	2;2;2;2	Not Available;Not Available;Not Available;Not Available	Not Available;Not Available;Not Available;Not Available	Not Available;Not Available;Not Available;Not Available	Not Available;Not Available;Not Available;Not Available	Not Applicable;Not Applicable;Not Applicable;Not Applicable	Not Available;Not Available;Not Available;Not Available	Not Available;Not Available;Not Available;Not Available	NO;NO;NO;NO	Chemotherapy;Chemotherapy;Chemotherapy;Chemotherapy
TCGA-BR-6710	MALE	273	Stomach, Adenocarcinoma, Not Otherwise Specified (NOS)	Stomach	Alive	T2	N0	M0	Stage IB	G2	0	273			TUMOR FREE		41	Gastroesophageal Junction	Not Available	Not Available	Not Available	Not Available	TCGA-BR-6710	012e99fe-e3e8-4bb0-bb74-5b0c9992187c	Kiev	Ukraine	23	-15316	Not Applicable	0	21	TCGA-BR-6710-D31240;TCGA-BR-6710-D31241	8ECA218B-1057-4600-936D-A13A13AE9967;9E8C3054-20C3-473D-A67C-7DB67BC91F45	Not Available;Not Available	25;25	85;85	78;78	Leucovorin;5-Fluorouracil	Complete Response;Complete Response	4;4	Not Available;Not Available	Not Available;Not Available	Not Available;Not Available	Not Available;Not Available	Not Applicable;Not Applicable	Not Available;Not Available	Not Available;Not Available	NO;NO	Ancillary;Chemotherapy
TCGA-HU-A4H5	MALE	724	Stomach, Intestinal Adenocarcinoma, Papillary Type	Stomach	Alive	T2	N0	M0	Stage IB	GX	0	724			TUMOR FREE		71	Fundus/Body	Not Available	Unknown	Not Available	No	TCGA-HU-A4H5	D262FDF0-30BF-4618-9342-DE5A2A053828	Pusan	Not Available	17	-26232	Not Applicable	0	374	TCGA-HU-A4H5-D42422	4EB83C2F-169A-4534-836F-91A633638295	Not Available	26	Not Available	404	Doxifluridine	Not Applicable	4	Not Available	Not Available	Not Available	Not Available	Not Applicable	Not Available	Not Available	YES	Chemotherapy
TCGA-D7-A74A	FEMALE	607	Stomach, Intestinal Adenocarcinoma, Tubular Type	Stomach	Alive	T3	N2	M0	Stage IIIA	G2	0	607			TUMOR FREE		61	Cardia/Proximal	Not Available	NO	Not Available	No	TCGA-D7-A74A	40837A4D-7931-497C-A6BF-6A661813C443	poznan	wlkp	31	-22435	Not Applicable	0	225
TCGA-BR-8682	MALE	991	Stomach, Intestinal Adenocarcinoma, Mucinous Type	Stomach	Alive	T4a	N0	M0	Stage IIB	G3	0	991			TUMOR FREE		52	Antrum/Distal	Not Available	Unknown	Not Available	No	TCGA-BR-8682	d5efcde2-21e6-4071-9aa4-3c5688a45b3f	Hanoi	Vietnam	11	-19165	Not Applicable	0	51	TCGA-BR-8682-D48360;TCGA-BR-8682-D48361;TCGA-BR-8682-D48362;TCGA-BR-8682-D48363	6FEB3C22-7D84-4166-805D-5A5A3C66903D;4A3F18D6-CDB8-4611-B6FC-AE541A9402B6;384CDBA6-34F9-4A2A-92CE-93A1C2C071D8;DE872954-0DAF-4036-84E2-E18B9DA3C859	Not Available;Not Available;Not Available;Not Available	7;7;7;7	181;181;181;181	60;60;60;60	Oxaliplatin;Epirubicin;Dexamethasone;Xeloda	Complete Response;Complete Response;Complete Response;Complete Response	10;10;10;10	Not Available;Not Available;Not Available;Not Available	Not Available;Not Available;Not Available;Not Available	Not Available;Not Available;Not Available;Not Available	Not Available;Not Available;Not Available;Not Available	Not Applicable;Not Applicable;Not Applicable;Not Applicable	Not Available;Not Available;Not Available;Not Available	Not Available;Not Available;Not Available;Not Available	NO;NO;NO;NO	Chemotherapy;Chemotherapy;Ancillary;Chemotherapy
TCGA-BR-8590	MALE	284	Stomach, Adenocarcinoma, Not Otherwise Specified (NOS)	Stomach	Dead	T4b	N2	M0	Stage IIIC	G3	1	223	Lung	Distant Metastasis	TUMOR FREE		62	Fundus/Body	Not Available	Not Available	Not Available	Unknown	TCGA-BR-8590	d59824bd-816e-4ffc-8aae-1c3eff1f800e	Tver	Russia	12	-22937	Not Applicable	0	65	TCGA-BR-8590-D53253;TCGA-BR-8590-D53256;TCGA-BR-8590-D53257	325CB6D7-65E1-40C6-B0B4-63B9CB24A935;2C4B31CD-54A0-4540-9FCB-F6AAE16381EC;6327A80C-7AE5-4A40-BE50-D547E2A2AD38	Not Available;Not Available;Not Available	10;10;10	203;203;203	42;42;42	Etoposide;5-Fluorouracil;Leucovorin	Complete Response;Complete Response;Complete Response	12;12;12	Not Available;Not Available;Not Available	Not Available;Not Available;Not Available	Not Available;Not Available;Not Available	Not Available;Not Available;Not Available	Not Applicable;Not Applicable;Not Applicable	Not Available;Not Available;Not Available	Not Available;Not Available;Not Available	NO;NO;NO	Chemotherapy;Chemotherapy;Ancillary
TCGA-BR-7717	MALE	552	Stomach, Adenocarcinoma, Not Otherwise Specified (NOS)	Stomach	Dead	T4	N1	M0	Stage IV	G2	0	552			Not Available		63	Cardia/Proximal	Not Available	Not Available	Not Available	Not Available	TCGA-BR-7717	93a337ae-2bd3-4464-b38f-93dff92d3fde	Tver	Russia	2	-23102	Not Applicable	0	21
TCGA-B7-5818	MALE	356	Stomach, Adenocarcinoma, Diffuse Type	Stomach	Alive	T2	N0	M0	Stage IB	G3	0	356			TUMOR FREE		62	Fundus/Body	Not Available	Not Available	H2 Blockers	Not Available	TCGA-B7-5818	6e03b415-84a1-4b91-8717-1a41edd4a255	Not Available	Russia	20	-22792	Not Applicable	0	3
TCGA-BR-A4QM	MALE	156	Stomach, Adenocarcinoma, Not Otherwise Specified (NOS)	Stomach	Alive	T3	N2	M0	Stage IIIA	G3	1	127		Locoregional Recurrence	TUMOR FREE		65	Cardia/Proximal	Not Available	NO	Not Available	No	TCGA-BR-A4QM	0E99C305-C69F-4FB4-84D6-29CAC1CC9D39	Kiev	Not Available	28	-23999	Not Applicable	0	17	TCGA-BR-A4QM-D51459;TCGA-BR-A4QM-D51461;TCGA-BR-A4QM-D51462	C8119E42-7DA9-4387-9F23-D406593E1B46;CF7E4BDE-561E-4C8D-8186-AE4FF8041F5F;A5C5001D-85FE-44E1-A2E9-7411B147D1B5	Not Available;Not Available;Not Available	19;19;19	106;106;106	42;42;42	5-Fluorouracil;Leucovorin;Cisplatin	Complete Response;Complete Response;Complete Response	11;11;11	Not Available;Not Available;Not Available	Not Available;Not Available;Not Available	Not Available;Not Available;Not Available	Not Available;Not Available;Not Available	Not Applicable;Not Applicable;Not Applicable	Not Available;Not Available;Not Available	Not Available;Not Available;Not Available	NO;NO;NO	Chemotherapy;Ancillary;Chemotherapy
TCGA-BR-A4J5	MALE	862	Stomach, Intestinal Adenocarcinoma, Mucinous Type	Stomach	Alive	T4a	N1	M0	Stage IIIA	G3	0	862			TUMOR FREE		56	Antrum/Distal	Not Available	NO	Not Available	No	TCGA-BR-A4J5	5A12857B-4132-4089-A7B7-E706366102DB	Hanoi	Vietnam	7	-20714	Not Applicable	0	13
TCGA-FP-A4BE	MALE	337	Stomach, Adenocarcinoma, Not Otherwise Specified (NOS)	Stomach	Alive	T3	N0	M0	Stage IIA	G3	0	337			TUMOR FREE		55	Fundus/Body	Not Available	YES	Antacids	Unknown	TCGA-FP-A4BE	48ABE0EF-DFD5-4E36-A319-C4EC3165CBA1	Memphis	Tennessee	25	-20148	Not Applicable	0	35	TCGA-FP-A4BE-D44166	33A9FF03-438A-46B5-A15B-36C039BA77E8	Not Available	14	239	102	5-FU	Complete Response	6	Not Available	Not Available	Not Available	Not Available	Not Applicable	Not Available	Not Available	NO	Chemotherapy
TCGA-HU-A4GU	MALE	200	Stomach, Adenocarcinoma, Diffuse Type	Stomach	Alive	T3	N1	M0	Stage IIB	G3	0	200			TUMOR FREE		73	Antrum/Distal	Not Available	Unknown	Not Available	Yes	TCGA-HU-A4GU	B93221BA-2076-4DD4-9931-179571B7E16C	Daegu	Not Available	11	-27024	Not Applicable	0	190
TCGA-CG-4472	MALE	365	Not Available	Stomach	Alive	T4	N1	M0	Stage IV	G3	1	122			WITH TUMOR		49	Antrum/Distal	Not Available	Not Available	Not Available	Not Available	TCGA-CG-4472	306f0222-8734-44ca-9a31-86e4e62b0a1b	Hamburg	Germany	22	-18110	Not Applicable	0	365	TCGA-CG-4472-D37575;TCGA-CG-4472-D37576;TCGA-CG-4472-D37577;TCGA-CG-4472-D37578	0D337B25-42A4-4B8A-8C4A-199AF1C63554;CE004927-8801-4AF6-87A9-1A71D9B9C7A6;2D2FA687-5EE8-4384-BEB8-5D9771FED0EF;213ACA82-DD48-442C-9B61-2545ECF33217	Not Available;Not Available;Not Available;Not Available	4;4;4;4	273;Not Available;Not Available;Not Available	122;122;122;303	Cisplatin;5-Fluorouracil;Folinic acid;Irinotecan	Partial Response;Not Applicable;Not Applicable;Not Applicable	12;12;12;12	Not Available;Not Available;Not Available;Not Available	Not Available;Not Available;Not Available;Not Available	Not Available;Not Available;Not Available;Not Available	Not Available;Not Available;Not Available;Not Available	Not Applicable;Not Applicable;Not Applicable;Not Applicable	Not Available;Not Available;Not Available;Not Available	Not Available;Not Available;Not Available;Not Available	NO;YES;YES;YES	Chemotherapy;Chemotherapy;Chemotherapy;Chemotherapy
TCGA-BR-4253	FEMALE	124	Stomach, Adenocarcinoma, Not Otherwise Specified (NOS)	Stomach	Dead	T3	N1	M0	Stage IIIA	G3	0	124			Not Available		80	Fundus/Body	Not Available	NO	Not Available	Not Available	TCGA-BR-4253	411257a4-a148-4606-8c8b-f9f1240e40ed	Kazan	Russia	6	-29397	Not Applicable	0	0
TCGA-B7-A5TI	MALE	595	Stomach, Adenocarcinoma, Diffuse Type	Stomach	Alive	T4	N3	M0	Stage IIIC	G3	0	595			TUMOR FREE		52	Fundus/Body	Not Available	YES	H2 Blockers;Antacids	Not Available	TCGA-B7-A5TI	4310A287-5F01-4E0D-94E3-96C5379C3245	Saint Petersburg	Russia	13	-19014	Not Applicable	0	230	TCGA-B7-A5TI-D68105	3D445D2E-4D6C-4F38-816D-11557D91CB96	Not Available	13	231	10	Eloxatin	Complete Response	11	Not Available	Not Available	Not Available	Not Available	Not Applicable	Not Available	Not Available	NO	Chemotherapy
TCGA-IN-8462	MALE	572	Stomach, Adenocarcinoma, Not Otherwise Specified (NOS)	Stomach	Alive	T2	N1	M0	Stage IIB	G2	1	270		Distant Metastasis	WITH TUMOR		80	Gastroesophageal Junction	Not Available	NO	Not Available	No	TCGA-IN-8462	ba3911e6-2208-4a04-8891-b5cba9fda6bf	Pittsburgh	PA	15	-29242	Not Applicable	0	319	TCGA-IN-8462-D43597;TCGA-IN-8462-D43598;TCGA-IN-8462-D43599;TCGA-IN-8462-D43600	A446E68D-CCAA-4E68-99D0-F77E589DA83D;A2B28491-DEE4-4BE0-AA89-5A33194169A6;6D66C746-8C08-4507-9E95-68DAEB38BECD;84E86AF4-FD87-4366-91A2-3F755E33455A	Not Available;Not Available;Not Available;Not Available	28;28;28;28	319;319;319;540	298;298;298;427	Epirubicin;Oxaliplatin;Xeloda;Taxol	Clinical Progressive Disease;Clinical Progressive Disease;Clinical Progressive Disease;Clinical Progressive Disease	5;5;5;5	Not Available;Not Available;Not Available;Not Available	Not Available;Not Available;Not Available;Not Available	Not Available;Not Available;Not Available;Not Available	Not Available;Not Available;Not Available;Not Available	Not Applicable;Not Applicable;Not Applicable;Not Applicable	Not Available;Not Available;Not Available;Not Available	Not Available;Not Available;Not Available;Not Available	NO;NO;NO;NO	Chemotherapy;Chemotherapy;Chemotherapy;Chemotherapy
TCGA-BR-8483	MALE	164	Stomach, Intestinal Adenocarcinoma, Not Otherwise Specified (NOS)	Stomach	Alive	T3	N2	M0	Stage IIIA	G2	0	164			TUMOR FREE		59	Antrum/Distal	Not Available	Not Available	Not Available	No	TCGA-BR-8483	e17cf9e9-0902-44e0-962b-af5492876f7d	Kiev	Ukraine	11	-21731	Not Applicable	0	25	TCGA-BR-8483-D49892;TCGA-BR-8483-D49893	972704B6-DC8C-4BAC-A026-F1C378A84E8F;160E024D-8EDA-44DB-8338-C71FD24E62AC	Not Available;Not Available	24;24	161;161	63;63	5-Fluorouracil;Cisplatin	Unknown;Unknown	1;1	Not Available;Not Available	Not Available;Not Available	Not Available;Not Available	Not Available;Not Available	Not Applicable;Not Applicable	Not Available;Not Available	Not Available;Not Available	NO;NO	Chemotherapy;Chemotherapy
TCGA-D7-5579	MALE	636	Stomach, Intestinal Adenocarcinoma, Mucinous Type	Stomach	Alive	T3	N2	M0	Stage IIIA	G3	0	636			TUMOR FREE		74	Fundus/Body	Not Available	YES	Not Available	No	TCGA-D7-5579	8b5746f9-dbee-40bd-9141-1081960cf286	Poznan	Poland	6	-27175	Not Applicable	0	138	TCGA-D7-5579-D13826;TCGA-D7-5579-D64890;TCGA-D7-5579-D64891	ef5c0d63-f405-4a85-844f-795ddb9e8555;C60400A7-C7F8-4082-A60C-92B4B940C8DF;64A6FCD0-2466-494F-8272-A6CC99061B9F	Not Available;Not Available;Not Available	11;15;15	307;307;307	25;25;25	Calcium Foliatum;ETC Posidum;fluorouracilum	Not Available;Not Available;Not Available	7;9;9	5;Not Available;Not Available	Not Available;Not Available;Not Available	mg;Not Available;Not Available	ADJUVANT;Not Available;Not Available	Not Applicable;Not Applicable;Not Applicable	Not Available;Not Available;Not Available	IV;Not Available;Not Available	NO;NO;NO	Chemotherapy;Chemotherapy;Chemotherapy
TCGA-RD-A8MV	MALE	3720	Stomach, Intestinal Adenocarcinoma, Not Otherwise Specified (NOS)	Stomach	Alive	T3	N2	M0	Stage IIIB	G3	0	3720			TUMOR FREE		56	Fundus/Body	Not Available	NO	Not Available	No	TCGA-RD-A8MV	17638F77-3D0A-4B7F-8801-D807AAD6BBD4	Melbourne	Victoria	28	-20771	Not Applicable	0	3720	TCGA-RD-A8MV-D57261;TCGA-RD-A8MV-D57262;TCGA-RD-A8MV-D57263	64B260D2-E38F-4078-875C-42E56261B24C;AB9CFB7F-D858-448E-9F69-F426B91ABBBB;B5F4B736-9D64-44BC-B4DE-A39D5FEB3298	Not Available;Not Available;Not Available	7;7;7	186;50;50	50;50;50	5-FU;Epirubicin;Cisplatin	Unknown;Unknown;Unknown	3;3;3	Not Available;Not Available;Not Available	Not Available;Not Available;Not Available	Not Available;Not Available;Not Available	Not Available;Not Available;Not Available	Not Applicable;Not Applicable;Not Applicable	Not Available;Not Available;Not Available	Not Available;Not Available;Not Available	NO;NO;NO	Chemotherapy;Chemotherapy;Chemotherapy
TCGA-BR-4255	FEMALE	124	Stomach, Adenocarcinoma, Not Otherwise Specified (NOS)	Stomach	Dead	T3	N1	M0	Stage IIIA	G3	0	124			Not Available		76	Not Available	Not Available	NO	Not Available	Not Available	TCGA-BR-4255	956017ba-5e4b-42c7-b93d-42316874ba93	Kazan	Russia	6	-27893	Not Applicable	0	0
TCGA-CD-8530	MALE	377	Stomach, Adenocarcinoma, Diffuse Type	Stomach	Alive	T3	N0	M0	Stage II	G3	0	377			TUMOR FREE		51	Fundus/Body	Not Available	Not Available	Not Available	Not Available	TCGA-CD-8530	0a11e958-7ec0-493c-bd7a-eb17536facd7	Not Available	Not Available	15	-18992	Not Applicable	0	5	TCGA-CD-8530-D71000;TCGA-CD-8530-D71001;TCGA-CD-8530-D71002	F8A66EE1-A2A5-452A-BD47-9BB4430A3245;21AF61CF-F2CF-4457-B8F7-399CAA2FE0E3;54C5A1E1-F645-4E8C-99BA-B27AE6D97178	Not Available;Not Available;Not Available	12;12;12	176;176;176	75;75;75	Epirubicin;Cisplatin;5-Flourouracil	Complete Response;Complete Response;Complete Response	3;3;3	Not Available;Not Available;Not Available	Not Available;Not Available;Not Available	Not Available;Not Available;Not Available	Not Available;Not Available;Not Available	Not Applicable;Not Applicable;Not Applicable	Not Available;Not Available;Not Available	Not Available;Not Available;Not Available	NO;NO;NO	Chemotherapy;Chemotherapy;Chemotherapy
TCGA-CG-4300	MALE	609	Stomach, Adenocarcinoma, Not Otherwise Specified (NOS)	Stomach	Dead	T3	N2	M0	Stage IIIB	G2	0	609			Not Available		79	Antrum/Distal	Not Available	Not Available	Not Available	Not Available	TCGA-CG-4300	8ed901f6-d1bc-48b1-8514-6e8c066dc160	Hamburg	Germany	22	-29128	609	0	Not Available
TCGA-RD-A8N4	FEMALE	2171	Stomach, Adenocarcinoma, Diffuse Type	Stomach	Alive	T3	N1	M0	Stage IIIA	G3	0	2171			TUMOR FREE		58	Antrum/Distal	Not Available	NO	Not Available	No	TCGA-RD-A8N4	26BBEAFA-6923-4C23-8D5F-AA33FBA92E82	Melbourne	Victoria	30	-21324	Not Applicable	0	2171	TCGA-RD-A8N4-D57478;TCGA-RD-A8N4-D57479;TCGA-RD-A8N4-D57480	6EA47B35-DDFE-4159-89B5-060C18B3E70C;8C7B5B76-A6C2-4BED-9AED-2CCC8AD94B5C;7193209A-BBB6-4FC0-8187-8F75060C784B	Not Available;Not Available;Not Available	11;11;11	189;49;49	49;49;49	5-FU;Epirubicin;Cisplatin	Unknown;Unknown;Unknown	3;3;3	Not Available;Not Available;Not Available	Not Available;Not Available;Not Available	Not Available;Not Available;Not Available	Not Available;Not Available;Not Available	Not Applicable;Not Applicable;Not Applicable	Not Available;Not Available;Not Available	Not Available;Not Available;Not Available	NO;NO;NO	Chemotherapy;Chemotherapy;Chemotherapy
TCGA-VQ-A91Q	MALE	633	Stomach, Intestinal Adenocarcinoma, Tubular Type	Stomach	Dead	T3	N3	M0	Stage IV	G3	1	551		Locoregional Recurrence	WITH TUMOR		61	Cardia/Proximal	Not Available	NO	Not Available	No	TCGA-VQ-A91Q	C60E89A7-A8BA-458E-8F10-785C3F562FD6	Barretos	Sao Paulo	22	-22303	633	0	Not Available	TCGA-VQ-A91Q-D64382	91421FCF-D5D9-4AF6-B476-31DE5F8DCCF1	Not Available	29	311	158	Fluorouracil	Complete Response	8	Not Available	Not Available	Not Available	Not Available	Not Applicable	Not Available	Not Available	NO	Chemotherapy
TCGA-IN-A6RJ	MALE	379	Stomach, Adenocarcinoma, Not Otherwise Specified (NOS)	Stomach	Alive	T1b	N0	M0	Stage IA	G3	0	379			TUMOR FREE		64	Gastroesophageal Junction	Not Available	YES	H2 Blockers	Yes	TCGA-IN-A6RJ	2A665611-2464-4FEF-8CE8-17C966FC74A5	Warren	Pennsylvania	18	-23439	Not Applicable	0	163
TCGA-HU-8604	FEMALE	694	Stomach, Intestinal Adenocarcinoma, Tubular Type	Stomach	Alive	T3	N0	M0	Stage IIA	G2	0	694			TUMOR FREE		82	Antrum/Distal	Not Available	Unknown	Not Available	No	TCGA-HU-8604	43945bf6-6e64-4f13-9822-baf30dcd726c	Pusan	Not Available	17	-30178	Not Applicable	0	368	TCGA-HU-8604-D42418	BDF4B5C2-C206-4F16-B98D-1728FB3E5138	Not Available	26	Not Available	39	Doxifluridine	Not Applicable	4	Not Available	Not Available	Not Available	Not Available	Not Applicable	Not Available	Not Available	YES	Chemotherapy
TCGA-CD-5813	MALE	377	Stomach, Intestinal Adenocarcinoma, Mucinous Type	Stomach	Dead	T3	N0	M0	Stage II	G3	1	315	Liver	Distant Metastasis	TUMOR FREE		60	Fundus/Body	Not Available	Not Available	Not Available	Not Available	TCGA-CD-5813	152b9d8a-19fd-4665-b9e4-4fedfb1608cd	Not Available	Vietnam	8	-21995	Not Applicable	0	12
TCGA-CG-4305	MALE	485	Stomach, Adenocarcinoma, Not Otherwise Specified (NOS)	Stomach	Alive	T2a	N1	M0	Stage II	G3	1	457			TUMOR FREE		69	Antrum/Distal	Not Available	Not Available	Not Available	Not Available	TCGA-CG-4305	e0e35051-fbb4-4389-aedb-87bde84d21ad	Hamburg	Germany	22	-25295	Not Applicable	0	485	TCGA-CG-4305-D37560;TCGA-CG-4305-D37561;TCGA-CG-4305-D37562	4FE50F2D-809A-4BCB-B02E-CC5155BDE7E6;693829F4-9F41-4BBE-BD11-A194EF952C3F;1491B5A4-ABEC-4743-94E5-7C70ADB82202	Not Available;Not Available;Not Available	4;4;4	669;699;699	607;607;607	Cisplatin;5-Fluorouracil;Folinic acid	Complete Response;Complete Response;Complete Response	12;12;12	Not Available;Not Available;Not Available	Not Available;Not Available;Not Available	Not Available;Not Available;Not Available	Not Available;Not Available;Not Available	Not Applicable;Not Applicable;Not Applicable	Not Available;Not Available;Not Available	Not Available;Not Available;Not Available	NO;NO;NO	Chemotherapy;Chemotherapy;Chemotherapy
TCGA-VQ-A8DL	FEMALE	28	Stomach, Intestinal Adenocarcinoma, Tubular Type	Stomach	Dead	T3	N0	M0	Stage IIA	G2	0	28			TUMOR FREE		69	Cardia/Proximal	Not Available	NO	Not Available	No	TCGA-VQ-A8DL	72B0E541-A287-45F9-883B-CAA5E4F6BAE6	Barretos	Sao Paulo	9	-25299	28	0	Not Available
TCGA-EQ-A4SO	MALE	494	Discrepancy	Stomach	Alive	T4b	N1	MX	Stage IIIB	G2	0	494			TUMOR FREE		70	Antrum/Distal	Not Available	YES	Proton Pump Inhibitors	No	TCGA-EQ-A4SO	FE1AD544-3189-4495-86BE-0C68F3234238	Newark	Delaware	20	-25897	Not Applicable	0	242	TCGA-EQ-A4SO-D51270;TCGA-EQ-A4SO-D51273;TCGA-EQ-A4SO-D51280	CD2B70A6-F1A4-4942-9F77-049AFAE3DE45;9572BB9B-E0A8-4CFA-8169-361391E2F556;EDDFA66F-3E02-4268-9B87-2D5795D6F20B	Not Available;Not Available;Not Available	14;14;14	300;300;222	83;83;179	Capecitabine;Oxaliplatin;Xeloda	Complete Response;Complete Response;Complete Response	11;11;11	Not Available;Not Available;Not Available	Not Available;Not Available;Not Available	Not Available;Not Available;Not Available	Not Available;Not Available;Not Available	Not Applicable;Not Applicable;Not Applicable	Not Available;Not Available;Not Available	Not Available;Not Available;Not Available	NO;NO;NO	Chemotherapy;Chemotherapy;Chemotherapy
TCGA-BR-6852	FEMALE	1367	Stomach, Adenocarcinoma, Not Otherwise Specified (NOS)	Stomach	Alive	T3	N0	M0	Stage IIA	G3	0	1367			TUMOR FREE		64	Gastroesophageal Junction	Not Available	Not Available	Not Available	Not Available	TCGA-BR-6852	44799c67-61cd-4f3e-bdbc-423e2e0fd2e8	Kiev	Ukraine	6	-23469	Not Applicable	0	8
TCGA-VQ-A8PK	MALE	543	Stomach, Intestinal Adenocarcinoma, Not Otherwise Specified (NOS)	Stomach	Dead	T3	N3a	M0	Stage IIIB	G2	1	263	Liver	Locoregional Recurrence	WITH TUMOR		58	Gastroesophageal Junction	Not Available	NO	Not Available	No	TCGA-VQ-A8PK	56BCB686-5010-439F-819F-95DDA9885CA5	Barretos	Sao Paulo	30	-21419	543	0	Not Available
TCGA-BR-8360	MALE	188	Stomach, Intestinal Adenocarcinoma, Not Otherwise Specified (NOS)	Stomach	Alive	T3	N0	M0	Stage IIA	G2	0	188			TUMOR FREE		66	Fundus/Body	Not Available	Not Available	Not Available	Unknown	TCGA-BR-8360	9db0da77-797d-45d2-abdc-a586dea94ed8	Kiev	Ukraine	17	-24394	Not Applicable	0	6
TCGA-BR-7715	MALE	1023	Stomach, Adenocarcinoma, Not Otherwise Specified (NOS)	Stomach	Alive	T3	N0	M0	Stage IIA	G2	0	1023			TUMOR FREE		65	Fundus/Body	Not Available	Not Available	Not Available	Not Available	TCGA-BR-7715	69704642-ba65-4a45-8f13-95d847185045	Tver	Russia	2	-23861	Not Applicable	0	32
TCGA-VQ-A8PC	MALE	1407	Stomach Adenocarcinoma, Signet Ring Type	Stomach	Dead	T3	N1	M0	Stage IIIA	G3	1	1287		Locoregional Recurrence	WITH TUMOR		65	Antrum/Distal	Not Available	NO	Not Available	No	TCGA-VQ-A8PC	26F3EE89-7F74-4C4E-AD6F-FAB29A5460F9	Barretos	Sao Paulo	26	-23912	1407	0	Not Available
TCGA-B7-A5TN	MALE	287	Stomach, Adenocarcinoma, Not Otherwise Specified (NOS)	Stomach	Alive	T4a	NX	M0	Stage IIB	G2	0	287			TUMOR FREE		60	Fundus/Body	Not Available	YES	H2 Blockers;Antacids	Not Available	TCGA-B7-A5TN	77535AF0-DEF4-439C-B50D-8720712235DD	Saint Petersburg	Russia	13	-21962	Not Applicable	0	166	TCGA-B7-A5TN-D68110	044E255F-164A-423E-A529-BE16C9D53E72	Not Available	13	166	23	Cisplatin	Complete Response	11	Not Available	Not Available	Not Available	Not Available	Not Applicable	Not Available	Not Available	NO	Chemotherapy
TCGA-VQ-A8E0	MALE	562	Stomach, Intestinal Adenocarcinoma, Not Otherwise Specified (NOS)	Stomach	Dead	T3	N2	M0	Stage IIIA	G3	1	531	Liver	Distant Metastasis	WITH TUMOR		68	Fundus/Body	Not Available	NO	Not Available	No	TCGA-VQ-A8E0	EB9A558C-39EF-42C0-8DFC-64D01B729426	Barretos	Sao Paulo	9	-24848	562	0	Not Available	TCGA-VQ-A8E0-D64680	5F7FF237-739E-4B57-84A3-046625B24DA0	Not Available	9	Discrepancy	Discrepancy	Fluorouracil	Clinical Progressive Disease	9	Not Available	Not Available	Not Available	Not Available	Not Applicable	Not Available	Not Available	NO	Chemotherapy
TCGA-CG-4476	MALE	0	Stomach, Adenocarcinoma, Diffuse Type	Stomach	Alive	T4b	N3a	M0	Stage IIIC	G3	0	0			TUMOR FREE		69	Fundus/Body	Not Available	Not Available	Not Available	Not Available	TCGA-CG-4476	442d7415-d095-4962-8296-a14390bad40a	Hamburg	Germany	22	-25506	Not Applicable	0	0
TCGA-3M-AB46	MALE	1765	Stomach, Adenocarcinoma, Not Otherwise Specified (NOS)	Stomach	Alive	T2b	N0	MX	Stage IB	G2	0	1765			TUMOR FREE		70	Other (please specify)	Fundus/Body and Lesser Curvature	Not Available	Not Available	No	TCGA-3M-AB46	BE6531B2-D1F3-44AB-9C02-1CEAE51EF2BB	Not Available	Not Available	15	Not Available	Not Applicable	0	1703	TCGA-3M-AB46-D62340;TCGA-3M-AB46-D62341	A8A6E33A-7DF9-466B-ABD0-F8EB912CAA9E;68A96028-7241-4576-BEF3-522FB06F918D	Not Available;Not Available	15;15	212;212	92;92	Fluorouracil;Leucovorin	Complete Response;Complete Response	7;7	Not Available;Not Available	Not Available;Not Available	Not Available;Not Available	Not Available;Not Available	Not Applicable;Not Applicable	Not Available;Not Available	Not Available;Not Available	NO;NO	Chemotherapy;Ancillary
TCGA-FP-7829	MALE	594	Stomach, Intestinal Adenocarcinoma, Mucinous Type	Stomach	Alive	T3	N1	M0	Stage IIB	G2	0	594			TUMOR FREE		69	Gastroesophageal Junction	Not Available	Not Available	Not Available	Not Available	TCGA-FP-7829	45aacbb4-0fd8-431c-a57b-279ea57a19fc	Minneapolis	Minnesota, USA	9	-25534	Not Applicable	0	6	TCGA-FP-7829-D44169	851E73E0-FBF1-41E9-B49D-05DC1E0F5BD2	Not Available	14	85	53	5-FU	Complete Response	6	Not Available	Not Available	Not Available	Not Available	Not Applicable	Not Available	Not Available	NO	Chemotherapy
TCGA-BR-8680	MALE	972	Stomach, Intestinal Adenocarcinoma, Tubular Type	Stomach	Alive	T4b	N2	M1	Stage IV	G2	0	972			TUMOR FREE		45	Antrum/Distal	Not Available	Unknown	Not Available	No	TCGA-BR-8680	ab76544e-df6a-4b05-9317-054812474d4c	Hanoi	Vietnam	11	-16637	Not Applicable	0	24	TCGA-BR-8680-D48354;TCGA-BR-8680-D48356;TCGA-BR-8680-D48357;TCGA-BR-8680-D48358	85D9F46B-ED79-4A17-A571-6FFFE1ACEDEF;9C291267-1086-4C46-8246-A311629B13F3;77B95195-E8D9-4E5D-964E-6972CB801422;50EF1ACB-4270-425D-A523-E55A8E9FEF9E	Not Available;Not Available;Not Available;Not Available	12;12;12;12	150;150;150;150	39;39;39;39	Oxaliplatin;Halaven;Epirubicin;Medrol	Complete Response;Complete Response;Complete Response;Complete Response	9;9;9;9	Not Available;Not Available;Not Available;Not Available	Not Available;Not Available;Not Available;Not Available	Not Available;Not Available;Not Available;Not Available	Not Available;Not Available;Not Available;Not Available	Not Applicable;Not Applicable;Not Applicable;Not Applicable	Not Available;Not Available;Not Available;Not Available	Not Available;Not Available;Not Available;Not Available	NO;NO;NO;NO	Chemotherapy;Chemotherapy;Chemotherapy;Ancillary
TCGA-VQ-A8PQ	FEMALE	476	Stomach, Intestinal Adenocarcinoma, Tubular Type	Stomach	Dead	T4	N1	M1	Stage IV	G2	1	91		Locoregional Recurrence	WITH TUMOR		50	Cardia/Proximal	Not Available	NO	Not Available	No	TCGA-VQ-A8PQ	7136D33F-6109-4D86-AD76-A02EF5C3808A	Barretos	Sao Paulo	30	-18318	476	0	Not Available
TCGA-FP-7916	MALE	428	Stomach, Adenocarcinoma, Diffuse Type	Stomach	Dead	T4a	N3a	MX	Stage IIIC	G3	1				WITH TUMOR		77	Antrum/Distal	Not Available	Not Available	Not Available	Not Available	TCGA-FP-7916	d384dd0c-1947-4ffc-bee9-de38311d8249	Tucson	AZ/USA	20	-28475	Not Applicable	0	92	TCGA-FP-7916-D46168	7496D73B-36AF-4253-ACFE-F45CBA69BC4A	Not Available	2	142	108	Xeloda	Clinical Progressive Disease	8	Not Available	Not Available	Not Available	Not Available	Not Applicable	Not Available	Not Available	NO	Chemotherapy
TCGA-HF-7133	FEMALE	1918	Stomach, Intestinal Adenocarcinoma, Mucinous Type	Stomach	Alive	T2b	N3	M0	Stage IV	G2	0	1918			TUMOR FREE		Not Available	Gastroesophageal Junction	Not Available	YES	Proton Pump Inhibitors	No	TCGA-HF-7133	5d33895e-a959-4d5e-8850-c49c7fa49a22	London	Ontario Canada	18	Not Available	Not Applicable	Not Available	Not Available	TCGA-HF-7133-D18979;TCGA-HF-7133-D19150;TCGA-HF-7133-D18983;TCGA-HF-7133-D71173;TCGA-HF-7133-D71174;TCGA-HF-7133-D71175	60a0c2ba-79bd-4752-9060-1cd75c817208;84bd34c7-66c5-4a08-b3e3-5204cdc8ee4a;1f750598-b418-450c-8fbf-af16210ac770;0AD2FBA9-19EC-42E8-AB22-AC6123BD30EA;C485E281-5953-4A1B-A038-6617D21687F5;D519FBFC-8AF0-40DA-B7BD-C197D2B78E29	Not Available;Not Available;Not Available;Not Available;Not Available;Not Available	22;22;22;19;19;19	Not Available;Not Available;Not Available;85;85;141	Not Available;Not Available;Not Available;85;85;85	Epirubicin;Cisplatin;Fluorouracil;Epirubicin;Cisplatin;Fluorouracil	Not Available;Not Available;Not Available;Unknown;Unknown;Unknown	11;11;11;3;3;3	1;01;2;Not Available;Not Available;Not Available	87;104;347;Not Available;Not Available;Not Available	mg;mg;mg;Not Available;Not Available;Not Available	ADJUVANT;ADJUVANT;ADJUVANT;Not Available;Not Available;Not Available	Not Applicable;Not Applicable;Not Applicable;Not Applicable;Not Applicable;Not Applicable	01;01;01;Not Available;Not Available;Not Available	IV;IV;IV;Not Available;Not Available;Not Available	NO;NO;NO;NO;NO;NO	Chemotherapy;Chemotherapy;Chemotherapy;Chemotherapy;Chemotherapy;Chemotherapy
TCGA-CD-5801	MALE	401	Stomach, Adenocarcinoma, Not Otherwise Specified (NOS)	Stomach	Dead	T3	N1	M0	Stage IIIA	G3	1				Discrepancy		69	Antrum/Distal	Not Available	Not Available	Not Available	Not Available	TCGA-CD-5801	df822ea3-e0e6-4ad3-a228-e20e3a737dac	Not Available	Vietnam	8	Not Available	Not Applicable	0	15
TCGA-CD-5803	FEMALE	341	Stomach, Adenocarcinoma, Not Otherwise Specified (NOS)	Stomach	Dead	T3	N0	M0	Stage II	G3	1	300	Liver	Distant Metastasis	TUMOR FREE		78	Antrum/Distal	Not Available	Not Available	Not Available	Not Available	TCGA-CD-5803	33901c6f-9180-4a19-866c-f4ac6bec76da	Not Available	Vietnam	8	-28608	Not Applicable	0	2
TCGA-CG-4466	FEMALE	577	Stomach, Intestinal Adenocarcinoma, Not Otherwise Specified (NOS)	Stomach	Alive	T2a	N0	M0	Stage IB	G2	0	577			TUMOR FREE		81	Cardia/Proximal	Not Available	Not Available	Not Available	Not Available	TCGA-CG-4466	2f1b96b2-7031-4f7d-9490-14728d320f3e	Hamburg	Germany	22	-29739	Not Applicable	0	577
TCGA-CD-8534	MALE	367	Stomach, Adenocarcinoma, Diffuse Type	Stomach	Alive	T3	N0	M0	Stage II	G3	1	201	Other, specify	Distant Metastasis	TUMOR FREE		41	Antrum/Distal	Not Available	Not Available	Not Available	Not Available	TCGA-CD-8534	65232ec1-4614-49bd-a3cf-d901d4f9556a	Not Available	Not Available	15	-15227	Not Applicable	0	0
TCGA-BR-7957	FEMALE	276	Stomach, Intestinal Adenocarcinoma, Not Otherwise Specified (NOS)	Stomach	Dead	T3	N3a	M1	Stage IV	GX	0	276			TUMOR FREE		50	Fundus/Body	Not Available	Not Available	Not Available	Not Available	TCGA-BR-7957	0dfa566e-8fb2-4288-81ce-b4bcce674b06	Tver	Russia	16	-18517	Not Applicable	0	21
TCGA-BR-7707	FEMALE	1090	Stomach, Adenocarcinoma, Not Otherwise Specified (NOS)	Stomach	Alive	T2	N0	M0	Stage IB	G3	0	1090			TUMOR FREE		69	Fundus/Body	Not Available	Not Available	Not Available	Not Available	TCGA-BR-7707	84d2d341-9e52-49ab-8c51-417208834c5d	Tver	Russia	18	-25325	Not Applicable	0	4
TCGA-IN-A6RS	MALE	383	Stomach, Adenocarcinoma, Not Otherwise Specified (NOS)	Stomach	Alive	T1b	N0	M0	Stage IA	G2	0	383			TUMOR FREE		76	Gastroesophageal Junction	Not Available	Unknown	Not Available	Unknown	TCGA-IN-A6RS	BAF9A42A-E39E-4AAC-B7B5-1B63B7FA1435	Martin's Ferry	Ohio	10	-27808	Not Applicable	0	209
TCGA-BR-4191	MALE	558	Stomach, Adenocarcinoma, Not Otherwise Specified (NOS)	Stomach	Dead	TX	N1	M0		G2	0	558			Not Available		72	Not Available	Not Available	NO	Not Available	Not Available	TCGA-BR-4191	74f859cf-6df5-4e96-ae6b-cfaab691d5fd	Kazan	Russia	2	-26562	Not Applicable	0	0	TCGA-BR-4191-D21832;TCGA-BR-4191-D34867;TCGA-BR-4191-D34868	FB0CF767-1C09-4947-A54C-0430D365B7DB;F094AE2F-D6F4-4A3B-AB37-50384861F5F7;C0185AF6-78AF-4986-AAE1-4CE1614B5E41	Not Available;Not Available;Not Available	21;5;5	104;104;104	3;3;3	Docetaxel;Cisplatin;5-Fluorouracil	Not Available;Unknown;Unknown	2;9;9	4;Not Available;Not Available	75;Not Available;Not Available	mg/m2;Not Available;Not Available	ADJUVANT;Not Available;Not Available	Not Applicable;Not Applicable;Not Applicable	1;Not Available;Not Available	IV;Not Available;Not Available	NO;NO;NO	Chemotherapy;Chemotherapy;Chemotherapy
TCGA-CG-5723	MALE	2496	Stomach, Adenocarcinoma, Not Otherwise Specified (NOS)	Stomach	Alive	T2	N1	M0	Stage II	G3	0	2496			Not Available		83	Cardia/Proximal	Not Available	Not Available	Not Available	No	TCGA-CG-5723	0f00ad32-e4be-49d4-a02a-d233bfc913c5	Hamburg	Germany	22	-30376	Not Applicable	0	2131
TCGA-VQ-A91Z	FEMALE	1690	Stomach, Intestinal Adenocarcinoma, Tubular Type	Stomach	Alive	T3	N1	M0	Stage IIIA	G2	1	1310		Locoregional Recurrence	WITH TUMOR		67	Antrum/Distal	Not Available	NO	Not Available	No	TCGA-VQ-A91Z	CAFBAE18-12A5-40FB-9DBE-C1D0598B9091	Barretos	Sao Paulo	22	-24652	Not Applicable	0	1346	TCGA-VQ-A91Z-D67233;TCGA-VQ-A91Z-D67234	9B48A985-B662-403D-A6CD-9FB498AB278F;78598CD3-2552-407A-A6D7-5D6D29F0F92E	Not Available;Not Available	3;3	322;322	97;97	Fluorouracil;Leucovorin	Complete Response;Complete Response	11;11	Not Available;Not Available	Not Available;Not Available	Not Available;Not Available	Not Available;Not Available	Not Applicable;Not Applicable	Not Available;Not Available	Not Available;Not Available	NO;NO	Chemotherapy;Chemotherapy
TCGA-RD-A8N9	FEMALE	1083	Stomach, Adenocarcinoma, Diffuse Type	Stomach	Alive	T2	N1	M0	Stage II	G3	0	1083			TUMOR FREE		63	Gastroesophageal Junction	Not Available	NO	Not Available	No	TCGA-RD-A8N9	8CE63594-BF4A-4B8D-9A48-49CB92B98EA9	Melbourne	Victoria	30	-23059	Not Applicable	0	1083	TCGA-RD-A8N9-D57485;TCGA-RD-A8N9-D57514;TCGA-RD-A8N9-D57516	D10D7F84-10D2-4841-B309-0D5EB2AC45D6;CE0E7D2B-FD82-4D99-A22C-5336863B48DE;5076D26C-551F-4153-AA1B-91469A7B56CE	Not Available;Not Available;Not Available	12;12;12	239;225;225	136;105;105	5-FU;Epirubicin;Cisplatin	Unknown;Unknown;Unknown	3;3;3	Not Available;Not Available;Not Available	Not Available;Not Available;Not Available	Not Available;Not Available;Not Available	Not Available;Not Available;Not Available	Not Applicable;Not Applicable;Not Applicable	Not Available;Not Available;Not Available	Not Available;Not Available;Not Available	NO;NO;NO	Chemotherapy;Chemotherapy;Chemotherapy
TCGA-CG-5725	MALE	457	Stomach, Adenocarcinoma, Not Otherwise Specified (NOS)	Stomach	Dead	T2	N0	M0	Stage IB	G3	1	153			WITH TUMOR		72	Cardia/Proximal	Not Available	Not Available	Not Available	No	TCGA-CG-5725	129d95ca-71ef-44aa-a93d-f87803c37c9a	Hamburg	Germany	22	-26329	457	0	Not Available	TCGA-CG-5725-D37585;TCGA-CG-5725-D37586;TCGA-CG-5725-D37587;TCGA-CG-5725-D37588;TCGA-CG-5725-D37589	C75FFCB1-97DF-4D25-9129-5739E83D3172;3FF1A034-1B02-4F39-828B-CA8D8CCF045D;F88EE3CF-8DE0-4FF5-B03D-FF90EFFA1FE1;A7A83AA9-3E61-4233-ACE2-366DAA7ED6F7;9E38E9CB-FA44-4B04-835D-829AC5CB50B4	Not Available;Not Available;Not Available;Not Available;Not Available	4;4;4;4;4	Not Available;Not Available;Not Available;334;Not Available	Not Available;Not Available;Not Available;334;Not Available	5-Fluorouracil;Oxaliplatin;Folinic acid;Docetaxel;Cetuximab	Clinical Progressive Disease;Clinical Progressive Disease;Clinical Progressive Disease;Clinical Progressive Disease;Clinical Progressive Disease	12;12;12;12;12	Not Available;Not Available;Not Available;Not Available;Not Available	Not Available;Not Available;Not Available;Not Available;Not Available	Not Available;Not Available;Not Available;Not Available;Not Available	Not Available;Not Available;Not Available;Not Available;Not Available	Not Applicable;Not Applicable;Not Applicable;Not Applicable;Not Applicable	Not Available;Not Available;Not Available;Not Available;Not Available	Not Available;Not Available;Not Available;Not Available;Not Available	NO;NO;NO;NO;NO	Chemotherapy;Chemotherapy;Chemotherapy;Chemotherapy;Targeted Molecular therapy
TCGA-BR-A4J6	FEMALE	20	Stomach, Adenocarcinoma, Not Otherwise Specified (NOS)	Stomach	Alive	T3	N0	M0	Stage IIA	G2	0	20			TUMOR FREE		69	Cardia/Proximal	Not Available	NO	Not Available	No	TCGA-BR-A4J6	0F344863-11CC-4FAE-8386-8247DFF59DE4	Kiev	Not Available	8	-25279	Not Applicable	0	4
TCGA-CD-A4MH	FEMALE	371	Stomach, Adenocarcinoma, Not Otherwise Specified (NOS)	Stomach	Alive	T3	N0	M0	Stage IIA	G2	0	371			TUMOR FREE		86	Antrum/Distal	Not Available	Not Available	Not Available	Not Available	TCGA-CD-A4MH	23451AB5-A32B-4EEC-9B8B-FD282282A0D4	Not Available	Not Available	13	-31683	Not Applicable	0	3	TCGA-CD-A4MH-D69938;TCGA-CD-A4MH-D69939;TCGA-CD-A4MH-D69941	F6BB0854-1B4F-4C68-AA1F-0936BB98BEC4;1116B2BF-2E4C-4EA9-8DAE-8C4FA273BC3C;6294FCF2-38E5-488E-A069-DAF2E23E63E8	Not Available;Not Available;Not Available	22;22;22	212;212;212	118;118;118	Epirubicin;Cisplatin;5-Flourouracil	Complete Response;Complete Response;Complete Response	1;1;1	Not Available;Not Available;Not Available	Not Available;Not Available;Not Available	Not Available;Not Available;Not Available	Not Available;Not Available;Not Available	Not Applicable;Not Applicable;Not Applicable	Not Available;Not Available;Not Available	Not Available;Not Available;Not Available	NO;NO;NO	Chemotherapy;Chemotherapy;Chemotherapy
TCGA-CG-5733	FEMALE	641	Stomach, Intestinal Adenocarcinoma, Not Otherwise Specified (NOS)	Stomach	Dead	T2	N2	M0	Stage IIIA	G3	1	427			WITH TUMOR		83	Antrum/Distal	Not Available	Not Available	Not Available	No	TCGA-CG-5733	8a9afa5e-63ce-41eb-aafb-b0b03653da5a	Hamburg	Germany	22	-30650	641	0	Not Available
TCGA-CG-5726	MALE	881	Stomach, Intestinal Adenocarcinoma, Not Otherwise Specified (NOS)	Stomach	Dead	T1	N0	M0	Stage IA	G2	0	881			TUMOR FREE		73	Antrum/Distal	Not Available	YES	Proton Pump Inhibitors	No	TCGA-CG-5726	863ad936-e2a0-471c-8d95-3a548bb94afa	Hamburg	Germany	22	-26998	881	0	Not Available
TCGA-BR-4361	FEMALE	0	Stomach, Adenocarcinoma, Not Otherwise Specified (NOS)	Stomach	Alive	T4	N0	M0	Stage IIIA	G3	0	0			Not Available		66	Not Available	Not Available	NO	Not Available	Not Available	TCGA-BR-4361	29ed984c-74b5-4016-a649-c32e5d1d9869	Ryazan	Russia	6	-24260	Not Applicable	0	0
TCGA-HU-A4HD	MALE	1016	Stomach, Intestinal Adenocarcinoma, Tubular Type	Stomach	Alive	T3	N2	M0	Stage IIIA	G2	0	1016			TUMOR FREE		73	Antrum/Distal	Not Available	NO	Not Available	No	TCGA-HU-A4HD	D807A1C0-F586-4F13-B8EF-3F79AB3D4B70	Hwasun, Jeollanam-Do	Not Available	10	-26699	Not Applicable	0	834
TCGA-BR-8380	MALE	21	Stomach, Adenocarcinoma, Not Otherwise Specified (NOS)	Stomach	Alive	T4a	N3a	M0	Stage IIIC	G3	1	467		Locoregional Recurrence	WITH TUMOR		55	Antrum/Distal	Not Available	Not Available	Not Available	Unknown	TCGA-BR-8380	9ebc8b58-363b-4638-8365-cfbde31a71ae	Kharkiv	Ukraine	17	-20157	Not Applicable	0	21	TCGA-BR-8380-D64092;TCGA-BR-8380-D65474;TCGA-BR-8380-D65476	523D5ED3-96F6-4CA5-8A77-ED8DAA5ADFB8;1D379E6A-1888-4119-B693-F50005318DC2;227B492A-CBAA-45B6-A90B-13A7402F2EFB	Not Available;Not Available;Not Available	26;15;15	190;190;190	69;69;69	Polyplatillen;5-Fluorouracil;Leucovorin	Complete Response;Complete Response;Complete Response	8;12;12	Not Available;Not Available;Not Available	Not Available;Not Available;Not Available	Not Available;Not Available;Not Available	Not Available;Not Available;Not Available	Not Applicable;Not Applicable;Not Applicable	Not Available;Not Available;Not Available	Not Available;Not Available;Not Available	NO;NO;NO	Chemotherapy;Chemotherapy;Ancillary
TCGA-VQ-A94R	MALE	1294	Stomach, Intestinal Adenocarcinoma, Not Otherwise Specified (NOS)	Stomach	Dead	T4a	N2	M0		G2	1	1018		Locoregional Recurrence	WITH TUMOR		63	Antrum/Distal	Not Available	NO	Not Available	No	TCGA-VQ-A94R	95EDFABE-0B35-4CDD-AED4-E2234D806F35	Barretos	Sao Paulo	20	-23246	1294	0	Not Available	TCGA-VQ-A94R-D64670	75810C15-1476-4192-9D27-164BDB5FF842	Not Available	9	645	591	Fluorouracil	Clinical Progressive Disease	9	Not Available	Not Available	Not Available	Not Available	Not Applicable	Not Available	Not Available	NO	Chemotherapy
TCGA-CG-4449	MALE	580	Stomach, Intestinal Adenocarcinoma, Mucinous Type	Stomach	Alive	T2	N1	M0	Stage II	G2	1	336			WITH TUMOR		81	Antrum/Distal	Not Available	Not Available	Not Available	Not Available	TCGA-CG-4449	10b5774d-7079-4b4b-b824-f4745f5598c7	Hamburg	Germany	22	-29705	Not Applicable	0	580
TCGA-BR-6453	MALE	485	Stomach, Adenocarcinoma, Not Otherwise Specified (NOS)	Stomach	Alive	T2	N1	M0	Stage IIA	G3	0	485			TUMOR FREE		54	Fundus/Body	Not Available	Not Available	Not Available	Not Available	TCGA-BR-6453	ae633e83-303f-4a90-ac3b-34458fd9beef	Tver	Russia	21	-20061	Not Applicable	0	0
TCGA-HU-A4H3	FEMALE	882	Stomach, Adenocarcinoma, Diffuse Type	Stomach	Alive	T4a	N3b	M0	Stage IIIC	G3	1	410	Other, specify	Distant Metastasis	WITH TUMOR		56	Fundus/Body	Not Available	NO	Not Available	No	TCGA-HU-A4H3	39FA91BD-DFFD-4B2C-AF7D-7FD914730B08	Seoul	Not Available	10	-20790	Not Applicable	0	589	TCGA-HU-A4H3-D41381;TCGA-HU-A4H3-D42338;TCGA-HU-A4H3-D42582	824F83CB-92EE-4A46-B268-5F3AE38BC708;3182424B-B793-4C4A-AE9D-3417249B826E;36BD2379-DDA1-46E1-9ACC-4218A712E883	Not Available;Not Available;Not Available	25;26;26	316;Not Available;666	18;466;466	TS-1;Xeloda(capecitabine);Eloxatin(oxaliplatin)	Complete Response;Clinical Progressive Disease;Clinical Progressive Disease	4;4;4	Not Available;Not Available;Not Available	Not Available;Not Available;Not Available	Not Available;Not Available;Not Available	Not Available;Not Available;Not Available	Not Applicable;Not Applicable;Not Applicable	Not Available;Not Available;Not Available	Not Available;Not Available;Not Available	NO;YES;NO	Chemotherapy;Chemotherapy;Chemotherapy
TCGA-BR-4292	FEMALE	0	Stomach, Adenocarcinoma, Not Otherwise Specified (NOS)	Stomach	Alive	T1	NX	M0		G1	0	0			Not Available		73	Fundus/Body	Not Available	NO	Not Available	Not Available	TCGA-BR-4292	703d3e86-32f4-44ae-bd88-c02378fc2269	Saratov	Russia	13	-26670	Not Applicable	0	0
TCGA-BR-6566	FEMALE	997	Stomach, Adenocarcinoma, Not Otherwise Specified (NOS)	Stomach	Alive	T3	N0	M0	Stage IIA	G3	0	997			TUMOR FREE		64	Fundus/Body	Not Available	Not Available	Not Available	Not Available	TCGA-BR-6566	43f0421c-6578-4d77-9314-ef0305c7efbd	Tver	Not Available	23	-23404	Not Applicable	0	19
TCGA-FP-8099	MALE	519	Stomach, Adenocarcinoma, Not Otherwise Specified (NOS)	Stomach	Alive	T3	N0	MX	Stage IIA	G2	0	519			Unknown		79	Gastroesophageal Junction	Not Available	Unknown	Not Available	Unknown	TCGA-FP-8099	5956529e-f359-47c9-8222-0bd7f68c1e65	Muskegon	Michigan	3	-29129	Not Applicable	0	34
TCGA-CD-8535	MALE	390	Stomach, Adenocarcinoma, Not Otherwise Specified (NOS)	Stomach	Alive	T3	N1	M0	Stage IIIA	G3	0	390			TUMOR FREE		59	Fundus/Body	Not Available	Not Available	Not Available	Not Available	TCGA-CD-8535	569dd23a-d0d7-409c-bc83-7340512f4195	Not Available	Not Available	15	-21559	Not Applicable	0	4	TCGA-CD-8535-D70954;TCGA-CD-8535-D70955;TCGA-CD-8535-D70956	F575C51D-7059-4E2D-A268-A13EE9363CA6;60BEAD84-ACB8-4886-B19B-A0FFC0C9B55D;6AADB438-9F15-45E6-8B23-AC64BB461799	Not Available;Not Available;Not Available	11;11;11	234;234;234	138;138;138	Docetaxel;Cisplatin;5-Flourouracil	Complete Response;Complete Response;Complete Response	3;3;3	Not Available;Not Available;Not Available	Not Available;Not Available;Not Available	Not Available;Not Available;Not Available	Not Available;Not Available;Not Available	Not Applicable;Not Applicable;Not Applicable	Not Available;Not Available;Not Available	Not Available;Not Available;Not Available	NO;NO;NO	Chemotherapy;Chemotherapy;Chemotherapy
TCGA-BR-8286	MALE	895	Stomach, Adenocarcinoma, Not Otherwise Specified (NOS)	Stomach	Alive	T3	N0	M0	Stage II	G3	0	895			TUMOR FREE		49	Antrum/Distal	Not Available	Not Available	Not Available	Unknown	TCGA-BR-8286	7d915d11-729c-4577-a948-9824a8b033ce	Tver	Russia	31	-17966	Not Applicable	0	13
TCGA-HU-A4G8	FEMALE	690	Stomach, Adenocarcinoma, Diffuse Type	Stomach	Alive	T3	N1	M0	Stage IIB	G3	0	690			TUMOR FREE		71	Antrum/Distal	Not Available	Unknown	Not Available	No	TCGA-HU-A4G8	16286EBD-6811-4E53-B4D5-82E1E825BC7A	Pusan	Not Available	14	-26254	Not Applicable	0	360	TCGA-HU-A4G8-D42421	56741153-A6E4-4BC8-91F2-EA8E0AC0D880	Not Available	26	Not Available	41	5-FU	Not Applicable	4	Not Available	Not Available	Not Available	Not Available	Not Applicable	Not Available	Not Available	YES	Chemotherapy
TCGA-CD-8524	FEMALE	388	Stomach, Intestinal Adenocarcinoma, Not Otherwise Specified (NOS)	Stomach	Alive	T3	N0	M0	Stage II	G3	1	69		Locoregional Recurrence	TUMOR FREE		61	Antrum/Distal	Not Available	Not Available	Not Available	Not Available	TCGA-CD-8524	315b8de8-9842-4738-b23b-1d61722f9583	Not Available	Not Available	15	-22445	Not Applicable	0	2	TCGA-CD-8524-D71009;TCGA-CD-8524-D71010;TCGA-CD-8524-D71011	0A7EC882-C204-46DA-89E6-EA358F353380;5764278D-F684-4502-873B-CF0C8D57BC2F;57ACFF4D-102E-471A-AB34-EB004A213E71	Not Available;Not Available;Not Available	12;12;12	168;168;168	64;64;64	Epirubicin;Cisplatin;5-Fluorouracil	Clinical Progressive Disease;Clinical Progressive Disease;Clinical Progressive Disease	3;3;3	Not Available;Not Available;Not Available	Not Available;Not Available;Not Available	Not Available;Not Available;Not Available	Not Available;Not Available;Not Available	Not Applicable;Not Applicable;Not Applicable	Not Available;Not Available;Not Available	Not Available;Not Available;Not Available	NO;NO;NO	Chemotherapy;Chemotherapy;Chemotherapy
TCGA-CD-A487	MALE	374	Stomach, Adenocarcinoma, Diffuse Type	Stomach	Alive	T3	N1	M0	Stage IIB	G3	0	374			TUMOR FREE		51	Antrum/Distal	Not Available	NO	Not Available	Not Available	TCGA-CD-A487	B7D2401E-7D64-4C89-A74C-16D634CAFE7F	Not Available	Not Available	11	-18694	Not Applicable	0	4	TCGA-CD-A487-D58112;TCGA-CD-A487-D58113;TCGA-CD-A487-D58114	2FE1DAEC-5BE5-495E-9136-FBBF6746937A;1D0FE4FC-5BBB-4762-B87A-B7E38932F709;D3FC6643-09AE-4E2F-8B86-FDFAB0DC24B6	Not Available;Not Available;Not Available	31;31;31	284;284;284	24;24;24	Epirubicin;Cisplatin;Capecitabine	Complete Response;Complete Response;Complete Response	3;3;3	Not Available;Not Available;Not Available	Not Available;Not Available;Not Available	Not Available;Not Available;Not Available	Not Available;Not Available;Not Available	Not Applicable;Not Applicable;Not Applicable	Not Available;Not Available;Not Available	Not Available;Not Available;Not Available	NO;NO;NO	Chemotherapy;Chemotherapy;Chemotherapy
TCGA-BR-8485	FEMALE	280	Stomach, Adenocarcinoma, Not Otherwise Specified (NOS)	Stomach	Alive	T4	N3a	M0	Stage IIIC	G3	0	280			TUMOR FREE		68	Fundus/Body	Not Available	Not Available	Not Available	Unknown	TCGA-BR-8485	1a3e7ec6-c9be-4174-8799-72267eb8a7bf	Tver	Russia	31	-24845	Not Applicable	0	9
TCGA-BR-8080	FEMALE	292	Stomach, Intestinal Adenocarcinoma, Mucinous Type	Stomach	Dead	T4	N3a	M0	Stage IIIC	G3	0	292			TUMOR FREE		72	Fundus/Body	Not Available	Not Available	Not Available	Not Available	TCGA-BR-8080	d0b78f02-2315-4c12-8b2a-ac1a110f882d	Tver	Russia	2	-26546	Not Applicable	0	15
TCGA-VQ-A8PY	FEMALE	436	Stomach, Intestinal Adenocarcinoma, Tubular Type	Stomach	Dead	T3	N2	M0	Stage IIIB	G2	0	436			TUMOR FREE		47	Antrum/Distal	Not Available	NO	Not Available	No	TCGA-VQ-A8PY	AC359B60-1977-4AA9-99D3-8D17D7D66E11	Barretos	Sao Paulo	30	-17230	436	0	Not Available	TCGA-VQ-A8PY-D64358	E2D0DF33-C876-4C1C-BEB5-5AFE512111CB	Not Available	29	192	54	Fluorouracil	Complete Response	8	Not Available	Not Available	Not Available	Not Available	Not Applicable	Not Available	Not Available	NO	Chemotherapy
TCGA-BR-A4CS	MALE	45	Stomach, Adenocarcinoma, Not Otherwise Specified (NOS)	Stomach	Dead	T4b	N3a	M0	Stage IIIC	G3	0	45			TUMOR FREE		77	Fundus/Body	Not Available	Not Available	Not Available	Unknown	TCGA-BR-A4CS	2A790F24-3563-4A7E-B445-56B71C70E685	Tver	Russia	6	-28211	Not Applicable	0	28
TCGA-HU-8602	FEMALE	679	Stomach, Adenocarcinoma, Diffuse Type	Stomach	Alive	T4a	N0	M0	Stage IIB	G3	0	679			TUMOR FREE		58	Antrum/Distal	Not Available	Unknown	Not Available	No	TCGA-HU-8602	edce7aac-1d8b-41cb-88e2-f50b8eeca4d8	Pusan	Not Available	17	-21522	Not Applicable	0	347	TCGA-HU-8602-D42417	BA8CD6F4-CA91-4C9F-B1F3-E123F5013B46	Not Available	26	154	30	Xeloda	Complete Response	4	Not Available	Not Available	Not Available	Not Available	Not Applicable	Not Available	Not Available	NO	Chemotherapy
TCGA-D7-A6F2	MALE	476	Stomach, Intestinal Adenocarcinoma, Tubular Type	Stomach	Alive	T2	N0	M0	Stage IB	G3	0	476			TUMOR FREE		62	Fundus/Body	Not Available	NO	Not Available	Unknown	TCGA-D7-A6F2	F4B1E633-38E6-4CC6-A0C6-911582D4066B	Poznan	Wlkp	7	-22801	Not Applicable	0	476
TCGA-HU-A4G2	MALE	739	Stomach, Adenocarcinoma, Diffuse Type	Stomach	Alive	T3	N1	M0	Stage IIB	G3	0	739			TUMOR FREE		45	Antrum/Distal	Not Available	Unknown	Not Available	No	TCGA-HU-A4G2	3B17C66A-34AE-4B10-B907-4464D6D58383	Pusan	Not Available	14	-16791	Not Applicable	0	739	TCGA-HU-A4G2-D42420	C5FDCF48-F9DA-4500-9415-3FF441AB984A	Not Available	26	Not Available	28	Doxifluridin	Not Applicable	4	Not Available	Not Available	Not Available	Not Available	Not Applicable	Not Available	Not Available	YES	Chemotherapy
TCGA-IN-A7NR	FEMALE	198	Stomach, Adenocarcinoma, Not Otherwise Specified (NOS)	Stomach	Alive	T3	N3	M1	Stage IV	G3	0	198			TUMOR FREE		64	Gastroesophageal Junction	Not Available	Unknown	Unknown	Unknown	TCGA-IN-A7NR	F74DF45F-8CFD-4DA8-BF84-7B1C80DC57EB	Youngstown	Ohio	1	-23415	Not Applicable	0	198	TCGA-IN-A7NR-D61523;TCGA-IN-A7NR-D61524	E0E8A4C0-1B89-4714-952E-19E00884D582;145B1F23-DBF7-4CB6-81BD-BEE7E5C3D16B	Not Available;Not Available	1;1	Not Available;Not Available	154;154	Carboplatin;Taxel	Unknown;Unknown	7;7	Not Available;Not Available	Not Available;Not Available	Not Available;Not Available	Not Available;Not Available	Not Applicable;Not Applicable	Not Available;Not Available	Not Available;Not Available	Not Available;Not Available	Chemotherapy;Chemotherapy
TCGA-CG-4455	MALE	366	Stomach, Intestinal Adenocarcinoma, Mucinous Type	Stomach	Alive	T2b	N1	M0	Stage II	G3	0	366			TUMOR FREE		72	Cardia/Proximal	Not Available	Not Available	Not Available	Not Available	TCGA-CG-4455	8a173d98-20a1-4c84-86c1-97818e1c665a	Hamburg	Germany	22	-26421	Not Applicable	0	366
TCGA-IP-7968	MALE	77	Stomach, Adenocarcinoma, Not Otherwise Specified (NOS)	Stomach	Alive	T3	N2	MX	Stage IIIB	G2	0	77			TUMOR FREE		74	Gastroesophageal Junction	Not Available	NO	Not Available	No	TCGA-IP-7968	faf5f1e3-9f7d-4a9d-a005-6cad5e4becf7	Not Available	Not Available	10	-27114	Not Applicable	0	77
TCGA-D7-8570	MALE	752	Stomach, Intestinal Adenocarcinoma, Tubular Type	Stomach	Alive	T3	N3a	M0	Stage IIIB	G3	1				TUMOR FREE		44	Cardia/Proximal	Not Available	NO	Not Available	No	TCGA-D7-8570	1e1cdf72-820f-48a4-8fb6-89575d07cde9	Poznan	Poland	23	-16150	Not Applicable	0	243	TCGA-D7-8570-D51359	898BBEFE-3CF8-4397-A77F-BE0D73CD7880	Not Available	18	243	36	PLFE	Clinical Progressive Disease	11	Not Available	Not Available	Not Available	Not Available	Not Applicable	Not Available	Not Available	NO	Chemotherapy
TCGA-R5-A805	MALE	281	Stomach, Intestinal Adenocarcinoma, Not Otherwise Specified (NOS)	Stomach	Dead	T3	N2	M0	Stage IIIB	G3	0	281			WITH TUMOR		71	Gastroesophageal Junction	Not Available	NO	Not Available	No	TCGA-R5-A805	7059EA66-93D7-4941-A35C-8A324D1AB94A	houston	texas	24	-26122	281	0	Not Available
TCGA-BR-A4J2	MALE	431	Stomach, Adenocarcinoma, Diffuse Type	Stomach	Alive	T4a	N0	M0	Stage IIB	G3	0	431			TUMOR FREE		70	Antrum/Distal	Not Available	NO	Not Available	No	TCGA-BR-A4J2	12F63577-7FAE-4FC8-9106-39729669FDFE	Hanoi	Vietnam	8	-25891	Not Applicable	0	24	TCGA-BR-A4J2-D49238;TCGA-BR-A4J2-D49239;TCGA-BR-A4J2-D49241;TCGA-BR-A4J2-D49242;TCGA-BR-A4J2-D49245	EAEBE00E-E594-4195-8B15-1067464DF4D5;AA7CD2AC-63EB-47E4-8D92-95889DFCDEA1;CB3C98C3-DA33-46D7-B123-084170F6FC77;7A15B382-6A69-4EDC-8843-BDD9BB1E821A;C7E39B7B-030B-4FD1-BC4E-9626D8E57C68	Not Available;Not Available;Not Available;Not Available;Not Available	27;27;27;27;27	125;125;125;125;125	51;51;51;51;51	Oxaliplatin;Epirubicin;Cisplatin;Dexamethasone;Leukine	Complete Response;Complete Response;Complete Response;Complete Response;Complete Response	9;9;9;9;9	Not Available;Not Available;Not Available;Not Available;Not Available	Not Available;Not Available;Not Available;Not Available;Not Available	Not Available;Not Available;Not Available;Not Available;Not Available	Not Available;Not Available;Not Available;Not Available;Not Available	Not Applicable;Not Applicable;Not Applicable;Not Applicable;Not Applicable	Not Available;Not Available;Not Available;Not Available;Not Available	Not Available;Not Available;Not Available;Not Available;Not Available	NO;NO;NO;NO;NO	Chemotherapy;Chemotherapy;Chemotherapy;Ancillary;Ancillary
TCGA-CG-5730	FEMALE	122	Stomach, Intestinal Adenocarcinoma, Not Otherwise Specified (NOS)	Stomach	Alive	T2	N1	M1	Stage IV	G2	0	122			TUMOR FREE		80	Cardia/Proximal	Not Available	YES	Proton Pump Inhibitors	No	TCGA-CG-5730	09587f1c-5c99-4102-bc49-84d50fa8d0ce	Hamburg	Hamburg/Germany	22	-29432	Not Applicable	0	122
TCGA-HU-8608	MALE	641	Stomach, Adenocarcinoma, Diffuse Type	Stomach	Alive	T4a	N2	M0	Stage IIIB	G3	1	277	Lung	Distant Metastasis	WITH TUMOR		70	Fundus/Body	Not Available	Unknown	Not Available	No	TCGA-HU-8608	c6316fb5-99a7-4adf-832f-dce44ddcd3aa	Pusan	Not Available	20	-25789	Not Applicable	0	323	TCGA-HU-8608-D42419	0A77BA14-8825-4395-997A-A5BA7C780662	Not Available	26	Not Available	36	Doxifluridine	Not Applicable	4	Not Available	Not Available	Not Available	Not Available	Not Applicable	Not Available	Not Available	YES	Chemotherapy
TCGA-D7-8575	MALE	554	Stomach, Intestinal Adenocarcinoma, Tubular Type	Stomach	Dead	T3	N2	M0	Stage IIIA	G3	1	427	Peritoneal Surfaces	Distant Metastasis	TUMOR FREE		75	Fundus/Body	Not Available	NO	Not Available	No	TCGA-D7-8575	00ee3098-1b32-4e7a-81ea-993773587c41	Poznan	Poland	23	-27712	Not Applicable	0	7
TCGA-BR-A4J7	MALE	989	Stomach, Intestinal Adenocarcinoma, Mucinous Type	Stomach	Alive	T4a	NX	M0	Stage IIB	G3	0	989			TUMOR FREE		49	Antrum/Distal	Not Available	NO	Not Available	No	TCGA-BR-A4J7	394F390A-563C-447C-8CAE-CD7D0D7E689F	Hanoi	Vietnam	7	-17932	Not Applicable	0	14
TCGA-BR-8363	FEMALE	8	Stomach, Adenocarcinoma, Not Otherwise Specified (NOS)	Stomach	Dead	T2	N0	M0	Stage IB	G3	0	8			TUMOR FREE		73	Antrum/Distal	Not Available	Not Available	Not Available	Unknown	TCGA-BR-8363	65ef7ccc-93e9-487a-9d4c-70ee7b9ddb17	Tver	Russia	17	-26976	8	0	Not Available
TCGA-CG-5728	FEMALE	579	Stomach, Intestinal Adenocarcinoma, Not Otherwise Specified (NOS)	Stomach	Alive	T2	N0	M0	Stage IB	G3	0	579			WITH TUMOR		88	Antrum/Distal	Not Available	YES	Proton Pump Inhibitors	No	TCGA-CG-5728	1286ac33-a466-4f58-900e-f6b13fe9c25a	Hamburg	Hamburg/Germany	22	-32293	Not Applicable	0	579
TCGA-D7-6522	MALE	566	Stomach, Adenocarcinoma, Diffuse Type	Stomach	Alive	T2	N0	M0	Stage IB	G3	0	566			TUMOR FREE		58	Antrum/Distal	Not Available	NO	Not Available	No	TCGA-D7-6522	8bb3facb-1933-4350-9f78-74537559e000	Poznan	Poland	13	-21465	Not Applicable	0	210
TCGA-HU-8238	MALE	46	Stomach, Intestinal Adenocarcinoma, Tubular Type	Stomach	Alive	T3		M0		G2	0	46			TUMOR FREE		56	Antrum/Distal	Not Available	Not Available	Not Available	Yes	TCGA-HU-8238	ac77e22d-42c0-4e06-b904-0dd5b31eb0d8	Daegu	Not Available	11	-20708	Not Applicable	0	46	TCGA-HU-8238-D42590;TCGA-HU-8238-D42589	0A1520C0-8375-43B2-B309-C50C377C8746;6E3EF210-089B-4D34-8A17-5A00781D8799	Not Available;Not Available	26;26	135;75	18;18	Didox;Copolang	Stable Disease;Stable Disease	4;4	Not Available;Not Available	Not Available;Not Available	Not Available;Not Available	Not Available;Not Available	Not Applicable;Not Applicable	Not Available;Not Available	Not Available;Not Available	NO;NO	Chemotherapy;Chemotherapy
TCGA-CG-4465	FEMALE	274	Stomach, Adenocarcinoma, Diffuse Type	Stomach	Dead	T4	N3	M1	Stage IV	G3	0	274			Not Available		69	Antrum/Distal	Not Available	Not Available	Not Available	Not Available	TCGA-CG-4465	c9ab5bf4-092a-420f-9b90-87deea58104c	Hamburg	Germany	22	-25233	274	0	Not Available	TCGA-CG-4465-D37569;TCGA-CG-4465-D37570;TCGA-CG-4465-D37571	E2E02467-7B85-4A00-8C1C-CB2F0BACA297;AB89D7CB-8D38-4CFD-8B18-0A773E31FBF4;2249E9A6-E5CA-4DB1-BED0-9785DE7B460B	Not Available;Not Available;Not Available	4;4;4	62;62;62	31;31;31	Cisplatin;5-Fluorouracil;Folinic acid	Unknown;Unknown;Unknown	12;12;12	Not Available;Not Available;Not Available	Not Available;Not Available;Not Available	Not Available;Not Available;Not Available	Not Available;Not Available;Not Available	Not Applicable;Not Applicable;Not Applicable	Not Available;Not Available;Not Available	Not Available;Not Available;Not Available	NO;NO;NO	Chemotherapy;Chemotherapy;Chemotherapy
TCGA-SW-A7EB	MALE	176	Stomach, Intestinal Adenocarcinoma, Mucinous Type	Stomach	Alive	T3	N2	M0	Stage IIIA	G2	0	176			Not Available		45	Antrum/Distal	Not Available	YES	Antacids	No	TCGA-SW-A7EB	BFDCC333-1B9D-44D2-90A4-C1720BA712E9	Chisinau	Republic of Moldova	24	-16475	Not Applicable	0	176	TCGA-SW-A7EB-D56024;TCGA-SW-A7EB-D56025;TCGA-SW-A7EB-D56026;TCGA-SW-A7EB-D56027;TCGA-SW-A7EB-D56028;TCGA-SW-A7EB-D56029;TCGA-SW-A7EB-D56030;TCGA-SW-A7EB-D56031;TCGA-SW-A7EB-D56032;TCGA-SW-A7EB-D56033;TCGA-SW-A7EB-D56034;TCGA-SW-A7EB-D56035	9537E9B4-12CC-4C88-958D-BDD3EA6D731B;E144DD9C-E3F1-4829-913B-50D8BC142A35;103EB591-19F6-4513-9C8B-827AFB26479C;DD4BCA11-AB99-4B38-AEE3-4D1663F1D9FB;A7CD5CC5-D770-4116-A896-AC30DB749220;9AB7E907-6432-4B21-BD00-A9B54C75D9B2;C9F32FDA-F421-4527-902A-4ABB77F4ACDD;9C70D3A7-938A-48BA-A737-C21F70D4284E;5AB31E67-4DC4-4DD8-A7C3-0773F438D310;8BE1D762-19E4-4265-8DE6-427F23A9BCD6;9B3B6E87-EB4B-4AC5-AAEF-F8062…	Not Available;Not Available;Not Available;Not Available;Not Available;Not Available;Not Available;Not Available;Not Available;Not Available;Not Available;Not Available	25;25;25;25;25;25;25;25;25;25;25;25	35;35;35;70;70;70;106;106;106;141;141;141	28;28;28;64;64;64;101;101;101;136;136;136	Fluorouracil;Doxorubicin;Cisplatin;Fluorouracil;Doxorubicin;Cisplatin;Fluorouracil;Doxorubicin;Cisplatin;Fluorouracil;Doxorubicin;Cisplatin	Stable Disease;Stable Disease;Stable Disease;Stable Disease;Stable Disease;Stable Disease;Stable Disease;Stable Disease;Stable Disease;Stable Disease;Stable Disease;Stable Disease	1;1;1;1;1;1;1;1;1;1;1;1	Not Available;Not Available;Not Available;Not Available;Not Available;Not Available;Not Available;Not Available;Not Available;Not Available;Not Available;Not Available	Not Available;Not Available;Not Available;Not Available;Not Available;Not Available;Not Available;Not Available;Not Available;Not Available;Not Available;Not Available	Not Available;Not Available;Not Available;Not Available;Not Available;Not Available;Not Available;Not Available;Not Available;Not Available;Not Available;Not Available	Not Available;Not Available;Not Available;Not Available;Not Available;Not Available;Not Available;Not Available;Not Available;Not Available;Not Available;Not Available	Not Applicable;Not Applicable;Not Applicable;Not Applicable;Not Applicable;Not Applicable;Not Applicable;Not Applicable;Not Applicable;Not Applicable;Not Applicable;Not Applicable	Not Available;Not Available;Not Available;Not Available;Not Available;Not Available;Not Available;Not Available;Not Available;Not Available;Not Available;Not Available	Not Available;Not Available;Not Available;Not Available;Not Available;Not Available;Not Available;Not Available;Not Available;Not Available;Not Available;Not Available	NO;NO;NO;NO;NO;NO;NO;NO;NO;NO;NO;NO	Chemotherapy;Chemotherapy;Chemotherapy;Chemotherapy;Chemotherapy;Chemotherapy;Chemotherapy;Chemotherapy;Chemotherapy;Chemotherapy;Chemotherapy;Chemotherapy
TCGA-BR-4368	FEMALE	0	Stomach, Adenocarcinoma, Not Otherwise Specified (NOS)	Stomach	Alive	T4	N2	M0	Stage IV	G3	0	0			Not Available		78	Antrum/Distal	Not Available	NO	Not Available	Not Available	TCGA-BR-4368	449bf2be-b20e-4ad0-9ffb-910d83114018	Kazan	Russia	6	-28770	Not Applicable	0	0
TCGA-BR-A4J9	MALE	14	Stomach, Adenocarcinoma, Not Otherwise Specified (NOS)	Stomach	Alive	T3	N0	M0	Stage IIA	G3	0	14			TUMOR FREE		55	Antrum/Distal	Not Available	NO	Not Available	No	TCGA-BR-A4J9	5034CC97-9EEC-42FE-ACF9-CDC5A10E6547	Kiev	Not Available	8	-20093	Not Applicable	0	3
TCGA-CG-4469	MALE	215	Stomach, Intestinal Adenocarcinoma, Not Otherwise Specified (NOS)	Stomach	Dead	T3	N3	M0	Stage IV	G3	0	215			Not Available		70	Stomach (NOS)	Not Available	Not Available	Not Available	Not Available	TCGA-CG-4469	2ac986f6-cd6f-4ca5-90cc-7a105cfe85ea	Hamburg	Germany	22	-25598	215	0	Not Available	TCGA-CG-4469-D37572;TCGA-CG-4469-D37573;TCGA-CG-4469-D37574	E5ECDA45-F458-4643-BF05-ABDBDFC96BDC;066A5F2D-2D5B-41C8-8AD9-29198D40DD26;7E6DEE4A-D635-4B08-8629-B6B66F49C16F	Not Available;Not Available;Not Available	4;4;4	215;215;215	31;31;31	Cisplatin;5-Fluorouracil;Folinic acid	Unknown;Unknown;Unknown	12;12;12	Not Available;Not Available;Not Available	Not Available;Not Available;Not Available	Not Available;Not Available;Not Available	Not Available;Not Available;Not Available	Not Applicable;Not Applicable;Not Applicable	Not Available;Not Available;Not Available	Not Available;Not Available;Not Available	NO;NO;NO	Chemotherapy;Chemotherapy;Chemotherapy
TCGA-VQ-A8PT	MALE	900	Stomach, Intestinal Adenocarcinoma, Not Otherwise Specified (NOS)	Stomach	Alive	T4b	N0	M0	Stage IIIB	G3	0	900			TUMOR FREE		65	Fundus/Body	Not Available	NO	Not Available	No	TCGA-VQ-A8PT	5C1AFB64-DA74-4D2C-8BE3-E6C21D2952A9	Barretos	Sao Paulo	30	-23797	Not Applicable	0	587	TCGA-VQ-A8PT-D64353;TCGA-VQ-A8PT-D64354	098B323A-0B39-48E9-96A2-EAE6950695C1;3EE08022-2343-48AC-928A-CE9768F8A27E	Not Available;Not Available	29;29	197;263	193;221	Fluorouracil;Xelox	Complete Response;Complete Response	8;8	Not Available;Not Available	Not Available;Not Available	Not Available;Not Available	Not Available;Not Available	Not Applicable;Not Applicable	Not Available;Not Available	Not Available;Not Available	NO;NO	Chemotherapy;Chemotherapy
TCGA-BR-4267	MALE	188	Stomach, Adenocarcinoma, Not Otherwise Specified (NOS)	Stomach	Dead	T2a	N0	M0	Stage IB	G2	0	188			Not Available		51	Not Available	Not Available	NO	Not Available	Not Available	TCGA-BR-4267	0d0f0200-25b8-483b-b04a-82a7833b4d30	Ryazan	Russia	26	-18699	Not Applicable	0	0
TCGA-BR-8381	MALE	224	Stomach, Adenocarcinoma, Not Otherwise Specified (NOS)	Stomach	Alive	T3	N1	M0	Stage IIB	G3	0	224			TUMOR FREE		51	Fundus/Body	Not Available	Not Available	Not Available	No	TCGA-BR-8381	aef8d98f-7a1c-47f3-b5a7-a3cb299c70de	Kiev	Ukraine	17	-18843	Not Applicable	0	8	TCGA-BR-8381-D42015;TCGA-BR-8381-D42017;TCGA-BR-8381-D42018	C2B0E7FB-E1DA-4B20-B143-57B2638F3BBA;8C009156-7F0B-4F2F-8E69-9A9DFE7D3658;08EFC579-4985-430F-9871-ADC8A1A9E6A1	Not Available;Not Available;Not Available	9;9;9	161;161;161	35;35;35	Oxaliplatin;Leucovorin;5-Fluorouracil	Complete Response;Complete Response;Complete Response	4;4;4	Not Available;Not Available;Not Available	Not Available;Not Available;Not Available	Not Available;Not Available;Not Available	Not Available;Not Available;Not Available	Not Applicable;Not Applicable;Not Applicable	Not Available;Not Available;Not Available	Not Available;Not Available;Not Available	NO;NO;NO	Chemotherapy;Ancillary;Chemotherapy
TCGA-VQ-AA6B	MALE	1002	Stomach, Intestinal Adenocarcinoma, Not Otherwise Specified (NOS)	Stomach	Alive	T3	N2	M0	Stage IIIB	G2	0	1002			TUMOR FREE		48	Gastroesophageal Junction	Not Available	NO	Not Available	Yes	TCGA-VQ-AA6B	40CB6F49-3D68-45DC-9BFA-B4D724DE7DFE	Barretos	Sao Paulo	9	-17852	Not Applicable	0	793	TCGA-VQ-AA6B-D64669	71291602-C996-44B8-9751-2F16D0F9FCF9	Not Available	9	262	131	Fluorouracil	Complete Response	9	Not Available	Not Available	Not Available	Not Available	Not Applicable	Not Available	Not Available	NO	Chemotherapy
TCGA-BR-A4CQ	MALE	1064	Stomach, Adenocarcinoma, Not Otherwise Specified (NOS)	Stomach	Alive	T4a	N1	M0	Stage IIIA	G3	1	962		Distant Metastasis	TUMOR FREE		58	Cardia/Proximal	Not Available	Not Available	Not Available	No	TCGA-BR-A4CQ	10A83FCB-AD7E-48A4-A35B-6A2CBD250707	LVIV	Ukraine	6	-21207	Not Applicable	0	69
TCGA-F1-A72C	MALE	346	Stomach, Intestinal Adenocarcinoma, Not Otherwise Specified (NOS)	Stomach	Alive	T3	N0	M0	Stage IIA	G2	1	343	Liver	Distant Metastasis	TUMOR FREE		68	Antrum/Distal	Not Available	NO	Not Available	No	TCGA-F1-A72C	5C76CB89-B1B1-4910-B811-E44D3B277430	Chapel Hill	NC	9	-25104	Not Applicable	0	247	TCGA-F1-A72C-D53060	2170E1D0-F575-410D-A6A1-0810B07B47E1	Not Available	9	181	166	Capecitabine	Complete Response	12	Not Available	Not Available	Not Available	Not Available	Not Applicable	Not Available	Not Available	NO	Chemotherapy
TCGA-BR-8368	FEMALE	131	Stomach, Adenocarcinoma, Not Otherwise Specified (NOS)	Stomach	Alive	T2	N0	M0	Stage IB	G3	0	131			TUMOR FREE		84	Fundus/Body	Not Available	Not Available	Not Available	Unknown	TCGA-BR-8368	00781a96-4068-427c-a9c5-584d167c3dea	Kiev	Ukraine	17	-30874	Not Applicable	0	42
TCGA-VQ-A91D	MALE	356	Stomach, Intestinal Adenocarcinoma, Not Otherwise Specified (NOS)	Stomach	Dead	T4b	N2	M0	Stage IIIC	G2	1	351		Locoregional Recurrence	WITH TUMOR		70	Fundus/Body	Not Available	NO	Not Available	No	TCGA-VQ-A91D	33A9F48E-75E5-4EC5-8E4A-7C6D91A98656	Barretos	Sao Paulo	9	-25686	356	0	Not Available	TCGA-VQ-A91D-D64677	11C87F76-33D3-4962-800E-13276D39684F	Not Available	9	242	147	Fluorouracil	Clinical Progressive Disease	9	Not Available	Not Available	Not Available	Not Available	Not Applicable	Not Available	Not Available	NO	Chemotherapy
TCGA-D7-6818	MALE	321	Stomach, Adenocarcinoma, Diffuse Type	Stomach	Alive	T2	N3	M0	Stage IIIA	G3	1	247		Locoregional Recurrence	TUMOR FREE		53	Fundus/Body	Not Available	NO	Not Available	No	TCGA-D7-6818	aa2934f9-8783-428e-88a6-1d04b93fa1fd	Poznan	Poland	18	-19391	Not Applicable	0	124	TCGA-D7-6818-D29925;TCGA-D7-6818-D64902	634e2d9f-675b-4944-b726-547fae43ec45;F10460B9-50CB-4721-800C-F7A800D6B78A	Not Available;Not Available	26;15	201;201	63;63	5 fluorouracilum;leucovorin	Not Available;Not Available	3;9	5;Not Available	Not Available;Not Available	mg/m2;Not Available	ADJUVANT;Not Available	Not Applicable;Not Applicable	Not Available;Not Available	IV;Not Available	NO;NO	Chemotherapy;Ancillary
TCGA-VQ-A91U	MALE	52	Stomach, Intestinal Adenocarcinoma, Not Otherwise Specified (NOS)	Stomach	Dead	T3	N1	M0	Stage IIIA	G2	0	52			Unknown		78	Gastroesophageal Junction	Not Available	NO	Not Available	No	TCGA-VQ-A91U	37B64809-C4FD-412D-9A7F-FAD6BF036AAF	Barretos	Sao Paulo	22	-28791	52	0	Not Available
TCGA-IN-A6RR	MALE	205	Stomach, Adenocarcinoma, Not Otherwise Specified (NOS)	Stomach	Dead	T3	N1	M0		G3	0	205			TUMOR FREE		84	Gastroesophageal Junction	Not Available	Unknown	Not Available	Unknown	TCGA-IN-A6RR	7AB5A708-803F-4D8C-9B25-645F06851A26	Brookville	Pennsylvania	10	-30734	205	0	Not Available	TCGA-IN-A6RR-D61665	E0A3FC19-7C10-4858-B595-1C83666E7A4E	Not Available	2	Not Available	111	Unkown	Unknown	7	Not Available	Not Available	Not Available	Not Available	Not Applicable	Not Available	Not Available	NO	Chemotherapy
TCGA-CG-5720	MALE	30	Stomach, Adenocarcinoma, Not Otherwise Specified (NOS)	Stomach	Dead	T2	N0	M0	Stage IB	G3	0	30			TUMOR FREE		71	Cardia/Proximal	Not Available	Not Available	Not Available	No	TCGA-CG-5720	7c9ea4fa-4cbc-4941-945a-e531e1d48304	Hamburg	Germany	22	-26176	30	0	Not Available
TCGA-CG-4460	FEMALE	669	Stomach, Intestinal Adenocarcinoma, Not Otherwise Specified (NOS)	Stomach	Dead	T4	N1	M1	Stage IV	G2	1	487			WITH TUMOR		66	Fundus/Body	Not Available	Not Available	Not Available	Not Available	TCGA-CG-4460	3c3d4ef0-019a-423e-89b2-4ac5a7b567ab	Hamburg	Germany	22	-24229	669	0	Not Available	TCGA-CG-4460-D37564;TCGA-CG-4460-D37565;TCGA-CG-4460-D37566;TCGA-CG-4460-D37567;TCGA-CG-4460-D37568	6216F809-3AD8-418D-847A-D67A7E879C36;F9D9E4EA-31E9-4DF5-A970-1AAC9AEED876;A007C145-28E1-4292-8581-801186428A69;CB78CAF9-7D16-458A-BA6B-4C74E7D107FF;A95C258D-1B4A-4C04-81DC-98B72C417655	Not Available;Not Available;Not Available;Not Available;Not Available	4;4;4;4;4	153;153;608;608;608	61;61;487;487;487	Capecitabine;Cisplatin;Folinic acid;Cisplatin;5-Fluorouracil	Partial Response;Partial Response;Partial Response;Partial Response;Partial Response	12;12;12;12;12	Not Available;Not Available;Not Available;Not Available;Not Available	Not Available;Not Available;Not Available;Not Available;Not Available	Not Available;Not Available;Not Available;Not Available;Not Available	Not Available;Not Available;Not Available;Not Available;Not Available	Not Applicable;Not Applicable;Not Applicable;Not Applicable;Not Applicable	Not Available;Not Available;Not Available;Not Available;Not Available	Not Available;Not Available;Not Available;Not Available;Not Available	NO;NO;NO;NO;NO	Chemotherapy;Chemotherapy;Chemotherapy;Chemotherapy;Chemotherapy
TCGA-BR-6706	MALE	549	Stomach, Adenocarcinoma, Not Otherwise Specified (NOS)	Stomach	Dead	T3	N1	M0	Stage IIIA	G3	1	402	Peritoneal Surfaces	Locoregional Recurrence	TUMOR FREE		63	Cardia/Proximal	Not Available	Not Available	Not Available	Not Available	TCGA-BR-6706	93aebbd4-19cf-495a-b8ce-3c4a3feba152	Kiev	Ukraine	23	-23053	Not Applicable	0	66	TCGA-BR-6706-D31136;TCGA-BR-6706-D31137;TCGA-BR-6706-D31138;TCGA-BR-6706-D31139;TCGA-BR-6706-D31141;TCGA-BR-6706-D31142;TCGA-BR-6706-D48238	715BDE47-0B8B-49F9-822F-674F612F117C;61B2F2A3-D013-4AB7-BECC-DDB957F6366E;2436ADA9-C071-4061-A8B1-39F90E7130FF;5F7FE1C5-45A8-4B9A-897F-B12225B1EED0;34DB3E5F-3CCC-4A18-843A-2C0E4B236991;89A605AD-53DF-4DE1-9078-AE6BED38A4BC;0D4A2166-A909-44ED-973E-B89436C81B2D	Not Available;Not Available;Not Available;Not Available;Not Available;Not Available;Not Available	24;24;24;24;24;24;10	147;147;147;445;445;410;445	56;56;56;402;402;402;441	5-Fluorouracil;Etoposide;Leucovorin;5-Fluorouracil;Leucovorin;Oxaliplatin;Cisplatin	Complete Response;Complete Response;Complete Response;Unknown;Unknown;Unknown;Unknown	4;4;4;4;4;4;9	Not Available;Not Available;Not Available;Not Available;Not Available;Not Available;Not Available	Not Available;Not Available;Not Available;Not Available;Not Available;Not Available;Not Available	Not Available;Not Available;Not Available;Not Available;Not Available;Not Available;Not Available	Not Available;Not Available;Not Available;Not Available;Not Available;Not Available;Not Available	Not Applicable;Not Applicable;Not Applicable;Not Applicable;Not Applicable;Not Applicable;Not Applicable	Not Available;Not Available;Not Available;Not Available;Not Available;Not Available;Not Available	Not Available;Not Available;Not Available;Not Available;Not Available;Not Available;Not Available	NO;NO;NO;NO;NO;NO;NO	Chemotherapy;Chemotherapy;Chemotherapy;Chemotherapy;Chemotherapy;Chemotherapy;Chemotherapy
TCGA-BR-4357	MALE	0	Stomach, Adenocarcinoma, Not Otherwise Specified (NOS)	Stomach	Alive	T3	NX	MX		G2	0	0			Not Available		58	Fundus/Body	Not Available	NO	Not Available	Not Available	TCGA-BR-4357	bec83dff-2bba-4467-92aa-5dc3db9e0eaf	Kazan	Russia	6	-21295	Not Applicable	0	0
TCGA-FP-A4BF	MALE	168	Stomach Adenocarcinoma, Signet Ring Type	Stomach	Dead	T3	N2	M0	Stage IIIA	G3	1	159	Lung	Distant Metastasis	WITH TUMOR		68	Gastroesophageal Junction	Not Available	Unknown	Not Available	Unknown	TCGA-FP-A4BF	0AE2B51D-AADE-4D24-8D0B-6990123D9074	Memphis	Tennessee	25	-25030	Not Applicable	0	47
TCGA-IN-8663	MALE	103	Stomach, Adenocarcinoma, Not Otherwise Specified (NOS)	Stomach	Dead	T2	N2	M0	Stage IIB	G3	0	103			TUMOR FREE		68	Gastroesophageal Junction	Not Available	Not Available	Not Available	Yes	TCGA-IN-8663	d5550422-dc4b-4ebf-acb5-aa5243fff49f	Not Available	Not Available	24	-25172	103	0	Not Available
TCGA-HU-A4G6	MALE	738	Stomach, Intestinal Adenocarcinoma, Papillary Type	Stomach	Alive	T1b	N0	M0	Stage IA	G3	0	738			TUMOR FREE		74	Cardia/Proximal	Not Available	NO	Not Available	No	TCGA-HU-A4G6	30A82E9F-2A2D-4A66-BDB1-26B881C21D01	Pusan	Not Available	14	-27208	Not Applicable	0	374
TCGA-IN-A6RO	MALE		Stomach, Adenocarcinoma, Not Otherwise Specified (NOS)	Stomach		T1b	N0	M0	Stage IA	G2	1	154		Distant Metastasis	Discrepancy		70	Gastroesophageal Junction	Not Available	Unknown	Not Available	Unknown	TCGA-IN-A6RO	2AE1706B-C0F7-40E3-AFE5-CB75D1584B96	Schaumburg	Illinois	10	-25789	Discrepancy	0	Not Available	TCGA-IN-A6RO-D69484;TCGA-IN-A6RO-D69485	FF3388A1-C715-466B-B5D5-5723C3DA4DD0;BEB9ABBE-D8F1-4C12-AB2C-4E3E2BEEF2E0	Not Available;Not Available	9;9	200;200	83;83	Irinotecan;Cisplatin	Complete Response;Complete Response	1;1	Not Available;Not Available	Not Available;Not Available	Not Available;Not Available	Not Available;Not Available	Not Applicable;Not Applicable	Not Available;Not Available	Not Available;Not Available	NO;NO	Chemotherapy;Chemotherapy
TCGA-VQ-AA6F	MALE	1646	Stomach, Intestinal Adenocarcinoma, Not Otherwise Specified (NOS)	Stomach	Alive	T3	N1	M0	Stage IIB	G2	1	546	Other, specify	Locoregional Recurrence	TUMOR FREE		57	Cardia/Proximal	Not Available	NO	Not Available	No	TCGA-VQ-AA6F	DCCD3854-8865-4452-9F1C-97283509B553	Barretos	Sao Paulo	9	-21170	Not Applicable	0	1646	TCGA-VQ-AA6F-D64682	B2EBE675-9B97-4D60-8383-A8ABD5F954F8	Not Available	9	249	119	Fluorouracil	Clinical Progressive Disease	9	Not Available	Not Available	Not Available	Not Available	Not Applicable	Not Available	Not Available	NO	Chemotherapy
TCGA-BR-8373	FEMALE	450	Stomach, Intestinal Adenocarcinoma, Not Otherwise Specified (NOS)	Stomach	Alive	T4a	N1	M0	Stage IIIA	G2	0	450			TUMOR FREE		65	Fundus/Body	Not Available	Not Available	Not Available	Unknown	TCGA-BR-8373	60879669-96c2-4710-82e0-0ae9d0e5b242	Kiev	Ukraine	17	-23744	Not Applicable	0	26	TCGA-BR-8373-D40169;TCGA-BR-8373-D40170;TCGA-BR-8373-D57688	78B475A5-C995-4AD6-BDFD-19A87889ED5D;D853330E-86D9-43F4-B5C8-E54132D3399B;360A35DC-AE12-4DB1-A11B-FC5DB2F0F704	Not Available;Not Available;Not Available	13;13;19	84;84;84	55;55;55	5-Fluorouracil;Leucovorin;Etoposide	Complete Response;Complete Response;Complete Response	2;2;3	Not Available;Not Available;Not Available	Not Available;Not Available;Not Available	Not Available;Not Available;Not Available	Not Available;Not Available;Not Available	Not Applicable;Not Applicable;Not Applicable	Not Available;Not Available;Not Available	Not Available;Not Available;Not Available	NO;NO;NO	Chemotherapy;Ancillary;Chemotherapy
TCGA-D7-8576	FEMALE	446	Stomach, Intestinal Adenocarcinoma, Tubular Type	Stomach	Dead	T3	N3a	M0	Stage IIIB	G3	1	204	Lung	Locoregional Recurrence	TUMOR FREE		54	Antrum/Distal	Not Available	NO	Not Available	No	TCGA-D7-8576	ec8268c7-943d-451a-9036-f0196078b6c5	Poznan	Poland	23	-20014	Not Applicable	0	98
TCGA-BR-A4J1	MALE	22	Stomach, Adenocarcinoma, Not Otherwise Specified (NOS)	Stomach	Dead	T4a	N1	M0	Stage IIIA	G3	0	22			Unknown		63	Antrum/Distal	Not Available	NO	Not Available	No	TCGA-BR-A4J1	E9A98A44-83F2-490C-B053-1E953EBD4E7E	Hanoi	Vietnam	8	-23266	22	0	Not Available
TCGA-VQ-AA6G	MALE	792	Stomach, Intestinal Adenocarcinoma, Not Otherwise Specified (NOS)	Stomach	Dead	T3	N0	M0	Stage IIA	G2	1	469	Lung	Distant Metastasis	WITH TUMOR		68	Cardia/Proximal	Not Available	NO	Not Available	No	TCGA-VQ-AA6G	A3F03A0A-F251-4588-97BC-3403597A35AD	Barretos	Sao Paulo	9	-25091	792	0	Not Available	TCGA-VQ-AA6G-D64691	2A41B04D-9375-48C1-8043-9F44FD0E8B08	Not Available	9	297	171	Fluorouracil	Clinical Progressive Disease	9	Not Available	Not Available	Not Available	Not Available	Not Applicable	Not Available	Not Available	NO	Chemotherapy
TCGA-BR-7197	MALE	280	Stomach, Adenocarcinoma, Not Otherwise Specified (NOS)	Stomach	Alive	T3	N0	M0	Stage II	GX	0	280			Not Available		69	Antrum/Distal	Not Available	Not Available	Not Available	Not Available	TCGA-BR-7197	79dbe26f-930b-420a-9a2e-483e3318ca10	Kiev	Ukraine	20	-25445	Not Applicable	0	46
TCGA-VQ-A927	MALE	200	Stomach, Adenocarcinoma, Diffuse Type	Stomach	Dead	T3	N3	M0	Stage IIIB	G1	0	200			WITH TUMOR		81	Fundus/Body	Not Available	NO	Not Available	No	TCGA-VQ-A927	76A4E24E-E645-47C5-836A-6A029E97A4C8	Barretos	Sao Paulo	23	-29676	200	0	Not Available
TCGA-HU-A4H0	MALE	64	Stomach, Adenocarcinoma, Diffuse Type	Stomach	Alive	T4a	N3b	M0	Stage IIIC	G3	0	64			TUMOR FREE		72	Fundus/Body	Not Available	Unknown	Not Available	No	TCGA-HU-A4H0	FE45EAEE-FF0C-4D52-B18C-04DC2D64D3B4	Pusan	Not Available	17	-26317	Not Applicable	0	64
TCGA-CG-4475	MALE	699	Not Available	Stomach	Alive	T3	N1	M0	Stage IIB	G3	0	699			TUMOR FREE		76	Stomach (NOS)	Not Available	Not Available	Not Available	Not Available	TCGA-CG-4475	cad2adc1-0f41-4651-9c80-ae9961e2dc8d	Hamburg	Germany	22	-28065	Not Applicable	0	0
TCGA-BR-4188	FEMALE	226	Stomach, Adenocarcinoma, Not Otherwise Specified (NOS)	Stomach	Dead	TX	N1	M0		G3	0	226			Not Available		53	Cardia/Proximal	Not Available	NO	Not Available	Not Available	TCGA-BR-4188	151257d7-ba5b-49a0-94f5-50e28f9f46f1	Kazan	Russia	2	-19585	Not Applicable	0	0
TCGA-BR-4370	FEMALE	0	Stomach, Adenocarcinoma, Not Otherwise Specified (NOS)	Stomach	Alive	TX	NX	M0		G2	0	0			Not Available		74	Antrum/Distal	Not Available	NO	Not Available	Not Available	TCGA-BR-4370	a2a71cb0-9dbd-45cc-8867-da84500515e7	Kazan	Russia	2	-27344	Not Applicable	0	0
TCGA-HU-A4GF	MALE	785	Stomach, Intestinal Adenocarcinoma, Tubular Type	Stomach	Alive	T3	N0	M0	Stage IIA	G2	0	785			TUMOR FREE		69	Antrum/Distal	Not Available	Not Available	Not Available	No	TCGA-HU-A4GF	DF89B0BE-FBE1-4CA7-BEA7-AE057C3F6461	Daegu	Not Available	10	-25223	Not Applicable	0	519
TCGA-BR-4280	FEMALE	201	Stomach, Adenocarcinoma, Not Otherwise Specified (NOS)	Stomach	Dead	T2b	N1	M0	Stage III	G2	0	201			Not Available		78	Not Available	Not Available	NO	Not Available	Not Available	TCGA-BR-4280	e0916597-e489-45ef-a8f7-653a3c6591ef	Ryazan	Russia	13	-28515	Not Applicable	0	0
TCGA-B7-A5TK	MALE	288	Stomach, Intestinal Adenocarcinoma, Not Otherwise Specified (NOS)	Stomach	Alive	T4		M0	Stage IIIA	G3	0	288			TUMOR FREE		51	Discrepancy	Not Available	YES	H2 Blockers;Antacids	Unknown	TCGA-B7-A5TK	4ED55013-3853-48EA-909F-7D26D5055637	Saint Petersburg	Russia	13	-18750	Not Applicable	0	55	TCGA-B7-A5TK-D68108	21DF9812-CE12-45E9-8ED5-D0783ABD6A21	Not Available	13	55	13	Xeloda	Complete Response	11	Not Available	Not Available	Not Available	Not Available	Not Applicable	Not Available	Not Available	NO	Chemotherapy
TCGA-HU-A4H8	MALE	270	Stomach, Intestinal Adenocarcinoma, Tubular Type	Stomach	Alive	T1b	N1	M0	Stage IB	G2	1	354		Distant Metastasis	TUMOR FREE		77	Antrum/Distal	Not Available	Unknown	Not Available	Yes	TCGA-HU-A4H8	98760B3E-3075-4444-9A01-8F11935069D4	Daegu	Not Available	11	-28292	Not Applicable	0	270	TCGA-HU-A4H8-D42600	641A776A-6E12-40C9-B22C-081EBECAC09D	Not Available	26	Not Available	18	Didox	Not Applicable	4	Not Available	Not Available	Not Available	Not Available	Not Applicable	Not Available	Not Available	YES	Chemotherapy
TCGA-KB-A6F5	MALE	169	Stomach, Intestinal Adenocarcinoma, Not Otherwise Specified (NOS)	Stomach	Alive	T3	N2	M0	Stage IIIA	G3	0	169			TUMOR FREE		73	Gastroesophageal Junction	Not Available	NO	Not Available	No	TCGA-KB-A6F5	E44B2FFD-7E1E-4C89-805F-F68E67C3DC9B	Toronto	Ontario	16	-26881	Not Applicable	0	169
TCGA-FP-8211	MALE	413	Stomach, Adenocarcinoma, Not Otherwise Specified (NOS)	Stomach	Alive	T3	N1	MX	Stage IIB	G2	0	413			WITH TUMOR		62	Cardia/Proximal	Not Available	Unknown	Not Available	Unknown	TCGA-FP-8211	0b1663fc-6a7e-4698-951d-a8c90fdf2411	Tulsa	Oklahoma	3	-22957	Not Applicable	0	86	TCGA-FP-8211-D44176;TCGA-FP-8211-D44177	34AF3A1E-1369-4474-94F4-685DA61EE187;05D02386-6DA2-4F5F-BDF2-3A989E33430E	Not Available;Not Available	14;14	357;279	110;110	Xeloda;Oxaliplatin	Complete Response;Complete Response	6;6	Not Available;Not Available	Not Available;Not Available	Not Available;Not Available	Not Available;Not Available	Not Applicable;Not Applicable	Not Available;Not Available	Not Available;Not Available	NO;NO	Chemotherapy;Chemotherapy
TCGA-HU-A4GT	FEMALE	198	Stomach, Intestinal Adenocarcinoma, Tubular Type	Stomach	Alive	T3	N0	M0	Stage IIA	G3	0	198			TUMOR FREE		71	Antrum/Distal	Not Available	Unknown	Not Available	No	TCGA-HU-A4GT	7997F3D8-BFF6-4808-8DF0-D88D344D7C9E	Daegu	Not Available	11	-26231	Not Applicable	0	198	TCGA-HU-A4GT-D42596;TCGA-HU-A4GT-D42597	54482893-E7D3-4E62-B08B-66DECF08AAD1;55D81573-576F-40C3-8F85-070D3733CECF	Not Available;Not Available	26;26	100;279	43;43	Copolang;Didox	Stable Disease;Stable Disease	4;4	Not Available;Not Available	Not Available;Not Available	Not Available;Not Available	Not Available;Not Available	Not Applicable;Not Applicable	Not Available;Not Available	Not Available;Not Available	NO;NO	Chemotherapy;Chemotherapy
TCGA-BR-7901	MALE	105	Stomach, Adenocarcinoma, Not Otherwise Specified (NOS)	Stomach	Dead	T3	N1	M0	Stage IIB	G2	1	91		Locoregional Recurrence	TUMOR FREE		74	Gastroesophageal Junction	Not Available	Not Available	Not Available	Not Available	TCGA-BR-7901	9b5e5122-8ea0-432c-bc64-932bf376fffd	Kiev	Ukraine	20	-27031	Not Applicable	0	29
TCGA-VQ-AA6A	MALE	1184	Stomach, Intestinal Adenocarcinoma, Not Otherwise Specified (NOS)	Stomach	Alive	T4	N3a	M0	Stage IIIC	G2	0	1184			TUMOR FREE		56	Gastroesophageal Junction	Not Available	NO	Not Available	No	TCGA-VQ-AA6A	EB7E9AAD-95D3-4EFC-A706-E2C986D17055	Barretos	Sao Paulo	26	-20764	Not Applicable	0	848
TCGA-HU-A4HB	MALE	477	Stomach, Adenocarcinoma, Diffuse Type	Stomach	Dead	T2	N2	M0	Stage IIB	G3	1	390		Distant Metastasis	TUMOR FREE		68	Antrum/Distal	Not Available	Unknown	Not Available	No	TCGA-HU-A4HB	36E36773-1D03-4ED0-AE31-1C0CA55577A4	Daegu	Not Available	11	-25131	Not Applicable	0	268	TCGA-HU-A4HB-D42601	9770C33F-ACC7-41CF-8867-219635F1627C	Not Available	26	Not Available	23	TS-1	Not Applicable	4	Not Available	Not Available	Not Available	Not Available	Not Applicable	Not Available	Not Available	YES	Chemotherapy
TCGA-BR-7196	MALE	666	Stomach, Adenocarcinoma, Not Otherwise Specified (NOS)	Stomach	Alive	T3	N3a	M1	Stage IV	G3	1	348	Lung	Distant Metastasis	WITH TUMOR		64	Cardia/Proximal	Not Available	Not Available	Not Available	Not Available	TCGA-BR-7196	1b641270-18f8-4257-821b-d26179e08e28	Kiev	Ukraine	20	-23611	Not Applicable	0	37	TCGA-BR-7196-D34110;TCGA-BR-7196-D34111;TCGA-BR-7196-D34115;TCGA-BR-7196-D34116;TCGA-BR-7196-D34117;TCGA-BR-7196-D34118	EE4F8265-96A3-4C0E-9013-C4C96C438852;41E004B1-1A32-46B7-BB6A-4809C5F44CA4;0BC87D30-C6B5-44C8-8B67-E468F801CF6C;FF0CB97A-8CAF-48CE-9C1C-CCB9990FBDDE;11ACEF5E-24B9-4B3B-8452-8F49DD2B3BD8;809AB54A-55EF-4742-AD01-ABC4F7ABF642	Not Available;Not Available;Not Available;Not Available;Not Available;Not Available	30;30;30;30;30;30	390;390;390;149;149;149	348;348;348;83;83;83	5-Fluorouracil;Leucovorin;Cisplatin;Etoposide;Leucovorin;5-Fluorouracil	Unknown;Unknown;Unknown;Unknown;Unknown;Unknown	7;7;7;7;7;7	Not Available;Not Available;Not Available;Not Available;Not Available;Not Available	Not Available;Not Available;Not Available;Not Available;Not Available;Not Available	Not Available;Not Available;Not Available;Not Available;Not Available;Not Available	Not Available;Not Available;Not Available;Not Available;Not Available;Not Available	Not Applicable;Not Applicable;Not Applicable;Not Applicable;Not Applicable;Not Applicable	Not Available;Not Available;Not Available;Not Available;Not Available;Not Available	Not Available;Not Available;Not Available;Not Available;Not Available;Not Available	NO;NO;NO;NO;NO;NO	Chemotherapy;Ancillary;Chemotherapy;Chemotherapy;Ancillary;Chemotherapy
TCGA-VQ-A91K	MALE	1862	Stomach, Intestinal Adenocarcinoma, Not Otherwise Specified (NOS)	Stomach	Alive	T3	N1	M0	Stage IIIA	G2	0	1862			TUMOR FREE		69	Antrum/Distal	Not Available	NO	Not Available	No	TCGA-VQ-A91K	2983F08C-3B32-4FB3-9D7E-5B34F9C2F741	Barretos	Sao Paulo	23	-25424	Not Applicable	0	1498	TCGA-VQ-A91K-D64377	B474ED84-E71A-4546-B8C4-4DF74D7D0352	Not Available	29	234	89	Fluorouracil	Complete Response	8	Not Available	Not Available	Not Available	Not Available	Not Applicable	Not Available	Not Available	NO	Chemotherapy
TCGA-VQ-A8PO	MALE	282	Stomach Adenocarcinoma, Signet Ring Type	Stomach	Dead	T4a	N0	M0	Stage IIB	G3	1	256		Locoregional Recurrence	Unknown		74	Antrum/Distal	Not Available	NO	Not Available	No	TCGA-VQ-A8PO	4EC9DBB4-358D-4C59-8039-552C7006C2BF	Barretos	Sao Paulo	30	-27250	282	0	Not Available
TCGA-D7-A4YT	MALE	434	Stomach, Intestinal Adenocarcinoma, Tubular Type	Stomach	Alive	T2	N3a	M0	Stage IIIA	G2	0	434			TUMOR FREE		56	Cardia/Proximal	Not Available	NO	Not Available	No	TCGA-D7-A4YT	6D5DF29C-F2CC-43CE-8D2F-DF1DA313AD52	Poznan	Not Available	24	-20742	Not Applicable	0	129
TCGA-IN-A7NT	FEMALE	323	Stomach, Adenocarcinoma, Not Otherwise Specified (NOS)	Stomach	Alive	T3	N1	M0	Stage IIB	G3	0	323			TUMOR FREE		73	Gastroesophageal Junction	Not Available	YES	Proton Pump Inhibitors	Unknown	TCGA-IN-A7NT	53108D62-6B7C-429F-9FEC-474781174968	Windber	Pennsylvania	11	-26727	Not Applicable	0	169	TCGA-IN-A7NT-D57462;TCGA-IN-A7NT-D61337;TCGA-IN-A7NT-D61339	ECB7FBBB-3573-4E30-80E3-28762A668E20;F043E124-7B73-439D-8D5C-CE97FFBDEA6D;DCCF82E6-7EDA-4C95-8EDF-175700F18198	Not Available;Not Available;Not Available	11;27;27	Not Available;Not Available;Not Available	112;112;112	Leucovorin;Fluorouracil;Oxaliplatin	Not Applicable;Not Applicable;Not Applicable	3;6;6	Not Available;Not Available;Not Available	Not Available;Not Available;Not Available	Not Available;Not Available;Not Available	Not Available;Not Available;Not Available	Not Applicable;Not Applicable;Not Applicable	Not Available;Not Available;Not Available	Not Available;Not Available;Not Available	YES;YES;YES	Chemotherapy;Chemotherapy;Chemotherapy
TCGA-D7-6820	MALE	344	Stomach, Intestinal Adenocarcinoma, Tubular Type	Stomach	Alive	T2	N1	M0	Stage IIB	G2	0	344			TUMOR FREE		64	Fundus/Body	Not Available	NO	Not Available	No	TCGA-D7-6820	1142251c-28eb-48bf-9c54-7126d4557605	Poznan	Poland	18	-23486	Not Applicable	0	89
TCGA-BR-4184	MALE	212	Stomach, Adenocarcinoma, Not Otherwise Specified (NOS)	Stomach	Dead	T3	N1	MX	Stage IIIA	G2	0	212			Not Available		70	Antrum/Distal	Not Available	NO	Not Available	Not Available	TCGA-BR-4184	0d4d23ba-066b-4244-a3a5-922cdcaaa28f	Kazan	Russia	6	-25816	Not Applicable	0	0
TCGA-HU-8244	FEMALE	742	Stomach, Intestinal Adenocarcinoma, Tubular Type	Stomach	Alive	T1a	N0	M0	Stage IA	G1	0	742			TUMOR FREE		77	Fundus/Body	Not Available	Unknown	Not Available	No	TCGA-HU-8244	f0b6e8f8-995c-47c1-bbec-d1d51dc97828	Pusan	Not Available	17	-28184	Not Applicable	0	434
TCGA-3M-AB47	MALE		Stomach, Adenocarcinoma, Not Otherwise Specified (NOS)	Stomach		T3	N2	MX	Stage IIIB	G3	1	395		Locoregional Recurrence	WITH TUMOR		51	Stomach (NOS)	Not Available	Not Available	Not Available	No	TCGA-3M-AB47	85C11B74-9E50-4DA1-8C0B-D5677CC801B1	Not Available	Not Available	16	Not Available	Not Available	0	Not Available	TCGA-3M-AB47-D62414;TCGA-3M-AB47-D62415;TCGA-3M-AB47-D63806;TCGA-3M-AB47-D63807;TCGA-3M-AB47-D63808	7085FF17-B2F6-4379-A52C-02E0AE0D3FF8;0E179CDF-639A-4865-8C10-D026B21350A7;232467AA-D9FE-4745-9752-0D4468BA22B3;BD0300F3-3F28-4175-B3A5-66933FBA9BA7;B51C6EE9-22F5-4866-B30E-63C380B27504	Not Available;Not Available;Not Available;Not Available;Not Available	16;16;19;19;19	242;153;242;153;242	122;122;181;122;181	5-FU;Epirubicin;Epirubicin;Cisplatin;Cisplatin	Stable Disease;Stable Disease;Stable Disease;Stable Disease;Stable Disease	7;7;8;8;8	Not Available;Not Available;Not Available;Not Available;Not Available	Not Available;Not Available;Not Available;Not Available;Not Available	Not Available;Not Available;Not Available;Not Available;Not Available	Not Available;Not Available;Not Available;Not Available;Not Available	Not Applicable;Not Applicable;Not Applicable;Not Applicable;Not Applicable	Not Available;Not Available;Not Available;Not Available;Not Available	Not Available;Not Available;Not Available;Not Available;Not Available	NO;NO;NO;NO;NO	Not Available;Chemotherapy;Chemotherapy;Chemotherapy;Chemotherapy
TCGA-BR-6565	MALE	279	Stomach, Adenocarcinoma, Not Otherwise Specified (NOS)	Stomach	Dead	T4a	N0	M0	Stage IIB	G2	1				TUMOR FREE		67	Fundus/Body	Not Available	Not Available	Not Available	Not Available	TCGA-BR-6565	daecea36-b379-46ce-8ae9-a38d22556ce2	Tver	Russia	23	-24495	Not Applicable	0	19
TCGA-BR-7958	MALE	899	Stomach, Adenocarcinoma, Not Otherwise Specified (NOS)	Stomach	Alive	T4b	N0	M0	Stage IIIB	G3	0	899			TUMOR FREE		60	Fundus/Body	Not Available	Not Available	Not Available	Not Available	TCGA-BR-7958	1fb6c06e-ecf4-4b4c-bb15-df8c0a9fad8f	Tver	Russia	14	-22204	Not Applicable	0	5
TCGA-VQ-A8PF	MALE	76	Stomach, Intestinal Adenocarcinoma, Tubular Type	Stomach	Dead	T3	N3b	M0	Stage IIIB	G3	0	76			TUMOR FREE		76	Fundus/Body	Not Available	NO	Not Available	No	TCGA-VQ-A8PF	94037C4F-7ACC-436B-8433-7213A385539A	Barretos	Sao Paulo	9	-28116	76	0	Not Available
TCGA-BR-A4PD	FEMALE	628	Stomach, Adenocarcinoma, Not Otherwise Specified (NOS)	Stomach	Alive	T4a	N0	M0	Stage IIB	G3	0	628			TUMOR FREE		72	Fundus/Body	Not Available	Not Available	Not Available	No	TCGA-BR-A4PD	DA2E8310-F54A-477E-A1FB-3F5542452780	Saratov	Not Available	21	-26334	Not Applicable	0	41
TCGA-HU-8245	MALE	552	Stomach, Intestinal Adenocarcinoma, Papillary Type	Stomach	Alive	T3	N0	M0	Stage IIA	G3	0	552			TUMOR FREE		72	Fundus/Body	Not Available	Unknown	Not Available	No	TCGA-HU-8245	4e9d13da-438d-4b5e-8e86-67432b5e9471	Pusan	Not Available	17	-26521	Not Applicable	0	383
TCGA-HU-A4GC	MALE	99	Stomach, Adenocarcinoma, Diffuse Type	Stomach	Alive	T4a	N2	M0	Stage IIIB	G3	0	99			TUMOR FREE		74	Antrum/Distal	Not Available	Not Available	Not Available	No	TCGA-HU-A4GC	13E5A0AD-6D0C-4FB4-BF62-325F5C8ED329	Daegu	Not Available	11	-27267	Not Applicable	0	99
TCGA-CG-5721	MALE	183	Stomach, Intestinal Adenocarcinoma, Not Otherwise Specified (NOS)	Stomach	Alive	T4	N1	M0	Stage IV	G3	0	183			TUMOR FREE		58	Antrum/Distal	Not Available	YES	Proton Pump Inhibitors	No	TCGA-CG-5721	588abaea-ab16-42f4-9457-5901ee791b5f	Hamburg	Germany	22	-21244	Not Applicable	0	183
TCGA-D7-6817	MALE	389	Stomach, Intestinal Adenocarcinoma, Tubular Type	Stomach	Alive	T2b	N3	M0	Stage IIIA	G3	0	389			TUMOR FREE		63	Fundus/Body	Not Available	NO	Not Available	No	TCGA-D7-6817	6ffefb3f-3919-4fef-ab15-5d32d8f51d57	Poznan	Poland	18	-23142	Not Applicable	0	24	TCGA-D7-6817-D29919	B1CC29BE-67A0-42D9-8E2E-C97DB9E46E5D	Not Available	30	144	32	5 fluorouracilum+leucovorin	Not Available	3	5	Not Available	mg/m2	ADJUVANT	Not Applicable	Not Available	IV	NO	Chemotherapy
TCGA-BR-6801	MALE	1223	Stomach, Adenocarcinoma, Not Otherwise Specified (NOS)	Stomach	Alive	T3	N0	M0	Stage IIA	G2	0	1223			TUMOR FREE		70	Fundus/Body	Not Available	Not Available	Not Available	Not Available	TCGA-BR-6801	24fed326-bdcf-4c20-a06e-7c1c3d6c9cc5	Tver	Russia	25	-25637	Not Applicable	0	35
TCGA-CG-5719	FEMALE	31	Stomach, Intestinal Adenocarcinoma, Not Otherwise Specified (NOS)	Stomach	Alive	T4	N0	M1	Stage IV	G1	0	31			TUMOR FREE		54	Fundus/Body	Not Available	YES	Proton Pump Inhibitors	No	TCGA-CG-5719	263f67e0-0a28-42e6-b3f3-1ddd0d397220	Hamburg	Hamburg/Germany	22	-19966	Not Applicable	0	31
TCGA-VQ-A94O	MALE	640	Stomach, Intestinal Adenocarcinoma, Not Otherwise Specified (NOS)	Stomach	Dead	T4a	N3	M0	Stage IIIC	G2	1	185	Liver	Distant Metastasis	WITH TUMOR		74	Antrum/Distal	Not Available	NO	Not Available	No	TCGA-VQ-A94O	E12D142E-7339-48FC-B17A-9E311B65327F	Barretos	Sao Paulo	20	-27306	640	0	Not Available	TCGA-VQ-A94O-D64672	524E53E4-6434-4F21-9C5E-9D701A56E6F3	Not Available	9	392	200	Fluorouracil	Clinical Progressive Disease	9	Not Available	Not Available	Not Available	Not Available	Not Applicable	Not Available	Not Available	NO	Chemotherapy
TCGA-BR-A4IU	FEMALE	838	Stomach, Adenocarcinoma, Diffuse Type	Stomach	Alive	T4a	N1	M0	Stage IIIA	G3	0	838			TUMOR FREE		34	Antrum/Distal	Not Available	NO	Not Available	No	TCGA-BR-A4IU	AF59B21E-2805-4C0B-8AAD-C99B26C79EE1	Hanoi	Vietnam	8	-12601	Not Applicable	0	18	TCGA-BR-A4IU-D48368;TCGA-BR-A4IU-D48369;TCGA-BR-A4IU-D48370	5DAEB4B4-652A-4DD6-BA78-9A0DFCAF848E;2CB12066-9402-4FCB-BA2B-C2A739F3178C;9FD32065-1967-44E0-844B-17E05071FE4D	Not Available;Not Available;Not Available	12;12;12	156;156;156	47;47;47	Oxaliplatin;Epirubicin;Dexamethasone	Complete Response;Complete Response;Complete Response	9;9;9	Not Available;Not Available;Not Available	Not Available;Not Available;Not Available	Not Available;Not Available;Not Available	Not Available;Not Available;Not Available	Not Applicable;Not Applicable;Not Applicable	Not Available;Not Available;Not Available	Not Available;Not Available;Not Available	NO;NO;NO	Chemotherapy;Chemotherapy;Ancillary
TCGA-BR-8078	FEMALE	900	Stomach, Adenocarcinoma, Not Otherwise Specified (NOS)	Stomach	Alive	T4a	N0	M0	Stage IIB	G3	0	900			TUMOR FREE		70	Fundus/Body	Not Available	Not Available	Not Available	Not Available	TCGA-BR-8078	ea600f9e-cda8-4a56-b8bd-e4c01ab724ba	Tver	Russia	2	-25861	Not Applicable	0	29
TCGA-BR-A4QL	FEMALE	491	Stomach, Adenocarcinoma, Not Otherwise Specified (NOS)	Stomach	Dead	T3	N3a	M0	Stage IIIB	G2	0	491			TUMOR FREE		75	Antrum/Distal	Not Available	NO	Not Available	No	TCGA-BR-A4QL	AA2C5D29-2764-4804-9181-5870C0956904	Kiev	Not Available	19	-27668	Not Applicable	0	0	TCGA-BR-A4QL-D51452;TCGA-BR-A4QL-D51453;TCGA-BR-A4QL-D51454;TCGA-BR-A4QL-D51455;TCGA-BR-A4QL-D51456	C8A99731-355D-40FE-BE66-8A3934502D5D;DE301F9E-1B4A-4324-BA8A-0ECA616E025D;7C73C91F-0AC8-4C52-AAF5-87165029234B;5B4FE56D-41B5-481E-B382-E7B0D479EC6C;771861FC-3CAA-44CA-8B64-CE00FA2F6962	Not Available;Not Available;Not Available;Not Available;Not Available	19;19;19;19;19	90;90;90;48;48	59;59;59;31;31	5-Fluorouracil;Leucovorin;Oxaliplatin;Xeloda;Oxaliplatin	Complete Response;Complete Response;Complete Response;Complete Response;Complete Response	11;11;11;11;11	Not Available;Not Available;Not Available;Not Available;Not Available	Not Available;Not Available;Not Available;Not Available;Not Available	Not Available;Not Available;Not Available;Not Available;Not Available	Not Available;Not Available;Not Available;Not Available;Not Available	Not Applicable;Not Applicable;Not Applicable;Not Applicable;Not Applicable	Not Available;Not Available;Not Available;Not Available;Not Available	Not Available;Not Available;Not Available;Not Available;Not Available	NO;NO;NO;NO;NO	Chemotherapy;Ancillary;Chemotherapy;Chemotherapy;Chemotherapy
TCGA-RD-A8N1	MALE	3519	Stomach, Adenocarcinoma, Diffuse Type	Stomach	Alive	T3	N2	M0	Stage IIIB	G3	0	3519			TUMOR FREE		70	Antrum/Distal	Not Available	NO	Not Available	Yes	TCGA-RD-A8N1	46D7489A-CFE6-440E-9D50-919D0EAD8018	Melbourne	Victoria	30	-25737	Not Applicable	0	3519	TCGA-RD-A8N1-D57471	E2E5C483-E96D-426E-ACFB-5B62999EC26E	Not Available	11	211	75	5-FU	Unknown	3	Not Available	Not Available	Not Available	Not Available	Not Applicable	Not Available	Not Available	NO	Chemotherapy
TCGA-D7-6526	FEMALE	523	Stomach, Intestinal Adenocarcinoma, Tubular Type	Stomach	Alive	T3	N2	M0	Stage IIIA	G2	0	523			TUMOR FREE		67	Fundus/Body	Not Available	NO	Not Available	No	TCGA-D7-6526	a28e57e2-9071-4558-856a-162f7a837380	Poznan	Poland	13	-24477	Not Applicable	0	201	TCGA-D7-6526-D28637;TCGA-D7-6526-D68505;TCGA-D7-6526-D68506;TCGA-D7-6526-D68507	c86e071b-6d28-4e4a-8ed0-4736ed7e76b6;97BD1807-DD7A-4441-9770-A65C2B13141D;0D17995B-DDE2-40F5-B3AB-356E1E1CBFE0;52EF598C-05F4-469A-B16D-DEC7FA6180A3	Not Available;Not Available;Not Available;Not Available	27;21;21;21	Not Available;Not Available;Not Available;Not Available	74;74;74;74	cisplatin;LEUCOVORIN;5-fluorouracil;epirubicin	Not Available;Not Available;Not Available;Not Available	2;11;11;11	Not Available;Not Available;Not Available;Not Available	30;Not Available;Not Available;Not Available	mg;Not Available;Not Available;Not Available	ADJUVANT;Not Available;Not Available;Not Available	Not Applicable;Not Applicable;Not Applicable;Not Applicable	Not Available;Not Available;Not Available;Not Available	IV;Not Available;Not Available;Not Available	YES;YES;YES;YES	Chemotherapy;Ancillary;Chemotherapy;Chemotherapy
TCGA-BR-8591	MALE	856	Stomach, Adenocarcinoma, Not Otherwise Specified (NOS)	Stomach	Alive	T4a	N3a	M0	Stage IIIC	G3	0	856			TUMOR FREE		79	Antrum/Distal	Not Available	Not Available	Not Available	Unknown	TCGA-BR-8591	0f3e2f16-1c06-4128-af45-ee73de19ea69	Tver	Russia	31	-29054	Not Applicable	0	6
TCGA-MX-A5UJ	FEMALE	600	Stomach, Intestinal Adenocarcinoma, Tubular Type	Stomach	Alive	T3	N2	M0	Stage IIIA	G3	0	600			TUMOR FREE		86	Antrum/Distal	Not Available	YES	Antacids	No	TCGA-MX-A5UJ	43E3FBF3-7812-45FB-BF4C-CE22A2AA1EEE	New York	New York	10	-31517	Not Applicable	0	137
TCGA-CD-8525	FEMALE	383	Stomach, Intestinal Adenocarcinoma, Mucinous Type	Stomach	Alive	T3	N1	M0	Stage IIIA	G3	0	383			TUMOR FREE		82	Antrum/Distal	Not Available	Not Available	Not Available	Not Available	TCGA-CD-8525	39acb803-f282-422e-ac56-a3a50693d203	Not Available	Not Available	15	-30004	Not Applicable	0	2	TCGA-CD-8525-D71006;TCGA-CD-8525-D71007;TCGA-CD-8525-D71008	E5715F42-8754-439D-9142-074B419DE385;CDD0A3A9-C58B-4FDE-BF5E-D50EBADB36AB;7D043D0F-40AA-4288-B5BA-8567F9A04045	Not Available;Not Available;Not Available	12;12;12	157;157;157	62;62;62	Epirubicin;Cisplatin;5-Flourouracil	Complete Response;Complete Response;Complete Response	3;3;3	Not Available;Not Available;Not Available	Not Available;Not Available;Not Available	Not Available;Not Available;Not Available	Not Available;Not Available;Not Available	Not Applicable;Not Applicable;Not Applicable	Not Available;Not Available;Not Available	Not Available;Not Available;Not Available	NO;NO;NO	Chemotherapy;Chemotherapy;Chemotherapy
TCGA-VQ-A8PZ	FEMALE	2233	Stomach Adenocarcinoma, Signet Ring Type	Stomach	Alive	T3	N0	M0	Stage II	G3	0	2233			TUMOR FREE		56	Fundus/Body	Not Available	NO	Not Available	No	TCGA-VQ-A8PZ	91C94A0D-F088-40E6-A4B1-D2A72AD35077	Barretos	Sao Paulo	30	-20735	Not Applicable	0	1800	TCGA-VQ-A8PZ-D64363	6367C026-7AF2-4BFE-91CE-A39993B8FDD5	Not Available	29	234	121	Fluorouracil	Complete Response	8	Not Available	Not Available	Not Available	Not Available	Not Applicable	Not Available	Not Available	NO	Chemotherapy
TCGA-BR-7959	MALE	1010	Stomach, Intestinal Adenocarcinoma, Mucinous Type	Stomach	Alive	T4a	N1	M0	Stage IIIA	G3	0	1010			TUMOR FREE		59	Cardia/Proximal	Not Available	Not Available	Not Available	Not Available	TCGA-BR-7959	b16167d0-d7d7-408e-bd0e-ce429b7f828c	Tver	Russia	14	-21730	Not Applicable	0	33	TCGA-BR-7959-D39862	3880CA8D-5764-4491-92DF-20C3C89BA3C2	Not Available	5	127	35	Etoposide	Complete Response	2	Not Available	Not Available	Not Available	Not Available	Not Applicable	Not Available	Not Available	NO	Chemotherapy
TCGA-BR-4183	FEMALE	201	Stomach, Adenocarcinoma, Not Otherwise Specified (NOS)	Stomach	Dead	T3	N1	M0	Stage IIIA	G3	0	201			Not Available		55	Cardia/Proximal	Not Available	NO	Not Available	Not Available	TCGA-BR-4183	33503349-ba7a-43f4-bcb2-ac8d16808432	Kazan	Russia	6	-20420	Not Applicable	0	0
TCGA-BR-4362	FEMALE	0	Stomach, Adenocarcinoma, Not Otherwise Specified (NOS)	Stomach	Alive	TX	N1	M0		G3	0	0			Not Available		74	Stomach (NOS)	Not Available	NO	Not Available	Not Available	TCGA-BR-4362	b1f261e9-c896-46d2-93c7-0290970196f8	Kazan	Russia	6	-27179	Not Applicable	0	0
TCGA-VQ-A928	MALE	174	Stomach, Intestinal Adenocarcinoma, Papillary Type	Stomach	Dead	T3	N3	M0	Stage IV	G2	1	148	Liver	Distant Metastasis	WITH TUMOR		49	Fundus/Body	Not Available	NO	Not Available	No	TCGA-VQ-A928	43B7A790-35A2-4786-B375-C3847D2AEC62	Barretos	Sao Paulo	22	-18058	174	0	Not Available	TCGA-VQ-A928-D64403	0ED28588-E3E5-4F96-8A42-5252CB038C0B	Not Available	29	138	98	Fluorouracil	Clinical Progressive Disease	8	Not Available	Not Available	Not Available	Not Available	Not Applicable	Not Available	Not Available	NO	Chemotherapy
TCGA-CD-A486	MALE	192	Stomach, Adenocarcinoma, Not Otherwise Specified (NOS)	Stomach	Dead	T3	N0	M0	Stage IIA	G2	1	79	Liver	Distant Metastasis	TUMOR FREE		68	Cardia/Proximal	Not Available	NO	Not Available	Not Available	TCGA-CD-A486	C63AE423-C90A-4CF4-AA42-653BB8FA3E69	Not Available	Not Available	11	-24879	Not Applicable	0	2	TCGA-CD-A486-D58108;TCGA-CD-A486-D58109;TCGA-CD-A486-D58110	C99A96B7-16A1-4C44-8941-9C047156BC2B;DC5F1783-D6E6-447E-B491-1A0C0F74A4C3;F5ED343B-469D-40F3-8845-D675CF3F9285	Not Available;Not Available;Not Available	31;31;31	57;57;57	37;37;37	Taxol;Cisplatin;Capecitabine	Complete Response;Complete Response;Complete Response	3;3;3	Not Available;Not Available;Not Available	Not Available;Not Available;Not Available	Not Available;Not Available;Not Available	Not Available;Not Available;Not Available	Not Applicable;Not Applicable;Not Applicable	Not Available;Not Available;Not Available	Not Available;Not Available;Not Available	NO;NO;NO	Chemotherapy;Chemotherapy;Chemotherapy
TCGA-BR-6457	MALE	416	Stomach, Adenocarcinoma, Not Otherwise Specified (NOS)	Stomach	Alive	T3	N0	M0	Stage IIA	G3	0	416			TUMOR FREE		69	Fundus/Body	Not Available	Not Available	Not Available	Not Available	TCGA-BR-6457	05ce16d4-a999-491a-91ad-9449a57228ff	Kiev	Ukraine	23	-25396	Not Applicable	0	41	TCGA-BR-6457-D30817;TCGA-BR-6457-D30818	20F9746C-645D-4ABD-ADC4-8BACE2E1BBAB;0E8A2B84-2A74-4A66-8F9D-CB2C1DC6D95B	Not Available;Not Available	17;17	126;126	31;31	Leucovorin;5-Fluorouracil	Complete Response;Complete Response	4;4	Not Available;Not Available	Not Available;Not Available	Not Available;Not Available	Not Available;Not Available	Not Applicable;Not Applicable	Not Available;Not Available	Not Available;Not Available	NO;NO	Ancillary;Chemotherapy
TCGA-BR-4201	FEMALE	940	Stomach, Adenocarcinoma, Not Otherwise Specified (NOS)	Stomach	Dead	T2a	NX	M0		G1	0	940			Not Available		66	Cardia/Proximal	Not Available	Not Available	Not Available	Not Available	TCGA-BR-4201	8520654b-2192-46cf-9d72-1ddb885a7c55	Saratov	Russia	2	-24354	Not Applicable	0	0	TCGA-BR-4201-D21839;TCGA-BR-4201-D33387	5BB6E54D-DF0D-4D35-87E3-3E90423A6224;550C74E7-B697-4F1B-B06D-454E119ABAAE	Not Available;Not Available	21;29	137;137	21;21	Cisplatin;5-Fluorouracil	Not Available;Unknown	2;6	3;Not Available	75;Not Available	mg/m2;Not Available	ADJUVANT;Not Available	Not Applicable;Not Applicable	1;Not Available	IV;Not Available	NO;NO	Chemotherapy;Chemotherapy
TCGA-HU-A4H6	FEMALE	644	Stomach, Intestinal Adenocarcinoma, Tubular Type	Stomach	Alive	T3	N2	M0	Stage IIIA	G2	0	644			WITH TUMOR		72	Antrum/Distal	Not Available	Unknown	Not Available	No	TCGA-HU-A4H6	416FD59B-A4F8-4610-9F8B-473CB5C04A4A	Pusan	Not Available	17	-26445	Not Applicable	0	294	TCGA-HU-A4H6-D42423	4436467C-9121-4D9D-B804-539CEECB5E2E	Not Available	26	Not Available	42	Doxifluridine	Not Applicable	4	Not Available	Not Available	Not Available	Not Available	Not Applicable	Not Available	Not Available	YES	Chemotherapy
TCGA-VQ-AA6I	MALE	491	Stomach, Intestinal Adenocarcinoma, Not Otherwise Specified (NOS)	Stomach	Dead	T3	N3	M0	Stage IIIB	G3	1	475		Locoregional Recurrence	WITH TUMOR		68	Gastroesophageal Junction	Not Available	NO	Not Available	No	TCGA-VQ-AA6I	3CCBE7C7-C779-4A98-B495-FF020D3E9E55	Barretos	Sao Paulo	9	-25091	491	0	Not Available	TCGA-VQ-AA6I-D64658	FACF827A-A698-4023-936B-84131CD34022	Not Available	9	349	133	Xelox	Clinical Progressive Disease	9	Not Available	Not Available	Not Available	Not Available	Not Applicable	Not Available	Not Available	NO	Chemotherapy
TCGA-VQ-A91X	MALE	289	Stomach, Intestinal Adenocarcinoma, Not Otherwise Specified (NOS)	Stomach	Dead	T3	N2	M0	Stage IIIB	G3	0	289			TUMOR FREE		74	Antrum/Distal	Not Available	NO	Not Available	No	TCGA-VQ-A91X	4B56B93E-934C-45FF-9D24-B4B6812A790B	Barretos	Sao Paulo	23	-27314	289	0	Not Available
TCGA-CG-4436	MALE	243	Stomach, Intestinal Adenocarcinoma, Not Otherwise Specified (NOS)	Stomach	Alive	T2	N0	M0	Stage IB	G2	0	243			Discrepancy		57	Stomach (NOS)	Not Available	Not Available	Not Available	Not Available	TCGA-CG-4436	7938ca55-766e-4277-9e7e-603ffa02e570	Hamburg	Germany	22	-20941	Not Applicable	0	243
TCGA-BR-8367	MALE	801	Stomach, Adenocarcinoma, Not Otherwise Specified (NOS)	Stomach	Dead	T3	N3a	M0	Stage IIIB	G3	1	580	Other, specify	Distant Metastasis	TUMOR FREE		55	Fundus/Body	Not Available	Not Available	Not Available	Unknown	TCGA-BR-8367	b12d9857-9ae1-445b-a963-b630b27b254e	Kiev	Ukraine	17	-20441	Not Applicable	0	33	TCGA-BR-8367-D40165;TCGA-BR-8367-D40166;TCGA-BR-8367-D40167;TCGA-BR-8367-D55901;TCGA-BR-8367-D55902;TCGA-BR-8367-D55903	BC75D8B6-0D76-47BC-885B-DCFD18EE3CAF;3CA60D71-63FC-4034-8162-554BC4A29562;2708C1A4-9D1E-4119-8746-32E749EAE3FF;777057FE-2A44-418C-BDF7-4AC6362CFDB8;49A7FB08-D143-4F26-B559-7045FAB31983;76E85FC6-ECE8-47D0-88CE-CE9E7B33EFF4	Not Available;Not Available;Not Available;Not Available;Not Available;Not Available	13;13;13;17;17;17	163;229;229;611;611;611	61;61;61;189;189;189	Etoposide;5-Fluorouracil;Leucovorin;5-Fluorouracil;Leucovorin;Oxaliplatin	Complete Response;Complete Response;Complete Response;Clinical Progressive Disease;Clinical Progressive Disease;Clinical Progressive Disease	2;2;2;1;1;1	Not Available;Not Available;Not Available;Not Available;Not Available;Not Available	Not Available;Not Available;Not Available;Not Available;Not Available;Not Available	Not Available;Not Available;Not Available;Not Available;Not Available;Not Available	Not Available;Not Available;Not Available;Not Available;Not Available;Not Available	Not Applicable;Not Applicable;Not Applicable;Not Applicable;Not Applicable;Not Applicable	Not Available;Not Available;Not Available;Not Available;Not Available;Not Available	Not Available;Not Available;Not Available;Not Available;Not Available;Not Available	NO;NO;NO;NO;NO;NO	Chemotherapy;Chemotherapy;Ancillary;Chemotherapy;Ancillary;Chemotherapy
TCGA-FP-8210	MALE	153	Stomach, Adenocarcinoma, Diffuse Type	Stomach	Dead	T3	N1	M0	Stage IIIA	G3	1				WITH TUMOR		48	Antrum/Distal	Not Available	YES	Proton Pump Inhibitors	Not Available	TCGA-FP-8210	92654ad8-156c-4dd1-862e-dc339240d721	Indianapolis	United States	16	-17562	153	0	Not Available	TCGA-FP-8210-D32936;TCGA-FP-8210-D32937;TCGA-FP-8210-D32938	59E3DAAA-12B0-4EDF-81BA-6E4F54B73A39;985A6C89-6AB8-4056-9E7C-E006C0272562;EC0BDDF1-693E-4E39-AFFD-8006DFDB4568	Not Available;Not Available;Not Available	16;16;16	62;62;62	31;31;31	5FU;Leucovorin;VP-16	Clinical Progressive Disease;Clinical Progressive Disease;Clinical Progressive Disease	6;6;6	Not Available;Not Available;Not Available	Not Available;Not Available;Not Available	Not Available;Not Available;Not Available	Not Available;Not Available;Not Available	Not Applicable;Not Applicable;Not Applicable	Not Available;Not Available;Not Available	Not Available;Not Available;Not Available	NO;NO;NO	Chemotherapy;Ancillary;Chemotherapy
TCGA-RD-A8NB	FEMALE	513	Stomach, Adenocarcinoma, Diffuse Type	Stomach	Dead	T3	N1	M0	Stage IIIA	G3	1	230	Non-regional / Distant Lymph Nodes	Distant Metastasis	WITH TUMOR		80	Antrum/Distal	Not Available	YES	Proton Pump Inhibitors	No	TCGA-RD-A8NB	FDB40436-A545-40DA-8C6B-2F8AFF359FF6	Melbourne	Victoria	30	-29503	513	0	Not Available
TCGA-RD-A8N2	FEMALE	3540	Stomach, Adenocarcinoma, Diffuse Type	Stomach	Alive	T2	N0	M0	Stage IB	G3	0	3540			TUMOR FREE		59	Antrum/Distal	Not Available	YES	Proton Pump Inhibitors	No	TCGA-RD-A8N2	158B6BD2-1E7D-4C7E-9D8A-42467342C9C2	Melbourne	Victoria	28	-21749	Not Applicable	0	3540
TCGA-VQ-A922	MALE	275	Stomach, Intestinal Adenocarcinoma, Tubular Type	Stomach	Dead	T4	N1	M0	Stage IV	G2	1	252	Liver	Distant Metastasis	Unknown		70	Antrum/Distal	Not Available	NO	Not Available	No	TCGA-VQ-A922	8BD783A3-D6C9-4C87-A2A1-09F903B9C7CA	Barretos	Sao Paulo	22	-25700	275	0	262	TCGA-VQ-A922-D64400	6A9F4DBF-C49F-4FE0-9C09-19EC8CC2F732	Not Available	29	85	83	Fluorouracil	Clinical Progressive Disease	8	Not Available	Not Available	Not Available	Not Available	Not Applicable	Not Available	Not Available	NO	Chemotherapy
TCGA-VQ-A8PP	MALE	712	Stomach, Intestinal Adenocarcinoma, Tubular Type	Stomach	Dead	T4	N1	M0	Stage IV	G2	1	502		Locoregional Recurrence	WITH TUMOR		76	Fundus/Body	Not Available	NO	Not Available	No	TCGA-VQ-A8PP	E181474C-1585-4AED-BA90-BAE5324569D5	Barretos	Sao Paulo	30	-27774	712	0	Not Available	TCGA-VQ-A8PP-D64347	F22052EF-BC6D-43DA-8C42-4EFA26744DF3	Not Available	29	333	165	Fluorouracil	Clinical Progressive Disease	8	Not Available	Not Available	Not Available	Not Available	Not Applicable	Not Available	Not Available	NO	Chemotherapy
TCGA-FP-7735	MALE	106	Stomach, Adenocarcinoma, Not Otherwise Specified (NOS)	Stomach	Dead	T2	N0	MX	Stage IB	G2	0	106			TUMOR FREE		77	Fundus/Body	Not Available	YES	Proton Pump Inhibitors	Not Available	TCGA-FP-7735	1d43af3c-4279-4aed-9ced-ce3896a48ae0	Tyler	Texas, USA	9	-28232	Not Applicable	0	12
TCGA-D7-6527	MALE	312	Stomach, Intestinal Adenocarcinoma, Papillary Type	Stomach	Dead	T2	N1	M0	Stage II	G2	1	75	Liver	Distant Metastasis	Discrepancy		62	Cardia/Proximal	Not Available	NO	Not Available	No	TCGA-D7-6527	cb622cd6-776d-4681-8a67-4addd61c66b8	Poznan	Poland	16	-22793	Not Applicable	0	126	TCGA-D7-6527-D22129;TCGA-D7-6527-D64900	336b311b-1e0b-47d8-b413-6ac99efb7866;D022D4CD-92DA-41FE-AC88-6E0D039B4685	Not Available;Not Available	24;15	116;116	55;55	5-FU;Leucovorin	Not Available;Not Available	2;9	Not Available;Not Available	Not Available;Not Available	mg;Not Available	ADJUVANT;Not Available	Not Applicable;Not Applicable	Not Available;Not Available	Not Available;Not Available	NO;NO	Chemotherapy;Ancillary
TCGA-D7-6822	MALE	375	Stomach, Intestinal Adenocarcinoma, Tubular Type	Stomach	Alive	T2	N0	M0	Stage IB	G2	0	375			TUMOR FREE		77	Fundus/Body	Not Available	NO	Not Available	Yes	TCGA-D7-6822	e2aaabd9-f4ba-4763-a28a-c14d46a4bc5d	Poznan	Poland	21	-28214	Not Applicable	0	131
TCGA-HU-8610	MALE	23	Stomach, Intestinal Adenocarcinoma, Tubular Type	Stomach	Alive	T1b	N0	M0	Stage IA	G2	0	23			TUMOR FREE		75	Fundus/Body	Not Available	Not Available	Not Available	No	TCGA-HU-8610	131fb0f0-e0af-431c-8462-f1925a5f4c72	Daegu	Korea	11	-27594	Not Applicable	0	23
TCGA-BR-4363	FEMALE	0	Stomach, Adenocarcinoma, Not Otherwise Specified (NOS)	Stomach	Alive	T3	NX	MX		G3	0	0			Not Available		60	Fundus/Body	Not Available	NO	Not Available	Not Available	TCGA-BR-4363	66bca2f8-f269-454d-abe2-ce51a0704645	Kazan	Russia	6	-22196	Not Applicable	0	0
TCGA-VQ-A8PX	MALE	1964	Stomach, Intestinal Adenocarcinoma, Not Otherwise Specified (NOS)	Stomach	Alive	T1	N0	M0	Stage IA	G2	0	1964			TUMOR FREE		51	Other (please specify)	Gastric stump	NO	Not Available	No	TCGA-VQ-A8PX	E6634A0A-9AB0-441E-A667-2F7F6C7368CC	Barretos	Sao Paulo	30	-18902	Not Applicable	0	1597
TCGA-VQ-A8P8	FEMALE	942	Stomach, Intestinal Adenocarcinoma, Not Otherwise Specified (NOS)	Stomach	Alive	T4a	N0	M0	Stage IIB	G2	0	942			TUMOR FREE		72	Fundus/Body	Not Available	NO	Not Available	No	TCGA-VQ-A8P8	0403E788-27F1-4205-9E73-ADE13B8DF1E0	Barretos	Sao Paulo	26	-26443	Not Applicable	0	580
TCGA-BR-A452	MALE	229	Stomach, Intestinal Adenocarcinoma, Tubular Type	Stomach	Dead	T4a	N1	M0	Stage IIIA	G3	0	229			TUMOR FREE		57	Antrum/Distal	Not Available	Unknown	Not Available	No	TCGA-BR-A452	722A3067-2B68-442F-A333-540AB085AF32	Hanoi	Not Available	6	-21107	Not Applicable	0	20
TCGA-BR-8382	FEMALE	762	Stomach, Adenocarcinoma, Not Otherwise Specified (NOS)	Stomach	Dead	T4b	N3a	M0	Stage IIIC	G3	0	762			TUMOR FREE		67	Antrum/Distal	Not Available	Not Available	Not Available	Unknown	TCGA-BR-8382	e617b5c5-55ca-47a7-8497-854ab2844818	Kiev	Ukraine	17	-24737	Not Applicable	0	13
TCGA-D7-A6ET	MALE	804	Stomach, Intestinal Adenocarcinoma, Tubular Type	Stomach	Alive	T3	N3a	M0	Stage IIIB	G2	1	777		Locoregional Recurrence	TUMOR FREE		76	Fundus/Body	Not Available	NO	Not Available	No	TCGA-D7-A6ET	25C4448F-F3C5-41BF-854E-1AEB60696C78	poznan	wlkp	28	-27928	Not Applicable	0	417
TCGA-BR-8588	FEMALE	389	Stomach, Adenocarcinoma, Not Otherwise Specified (NOS)	Stomach	Alive	T4a	N0	M0	Stage IIB	G3	0	389			TUMOR FREE		55	Fundus/Body	Not Available	Unknown	Not Available	Unknown	TCGA-BR-8588	ad73529b-92d7-412f-b001-920a61cec313	Tver	Russia	31	-20177	Not Applicable	0	23
TCGA-CG-5734	MALE	243	Stomach, Intestinal Adenocarcinoma, Not Otherwise Specified (NOS)	Stomach	Dead	T3	N1	M0	Stage IIIA	G3	0	243			Not Available		68	Fundus/Body	Not Available	Not Available	Not Available	No	TCGA-CG-5734	2a227292-c73d-45fc-ab68-cdfaf7aef9e7	Hamburg	Germany	22	-25079	243	0	Not Available
TCGA-BR-8679	FEMALE	0	Stomach, Adenocarcinoma, Not Otherwise Specified (NOS)	Stomach	Alive	T2	N0	M0	Stage IB	G2	0	0			TUMOR FREE		63	Fundus/Body	Not Available	Not Available	Not Available	Unknown	TCGA-BR-8679	03e3082e-9f8b-4689-9013-0a9954146dfa	Saratov	Russia	31	-23084	Not Applicable	0	0
TCGA-BR-A4PE	FEMALE	621	Stomach, Adenocarcinoma, Not Otherwise Specified (NOS)	Stomach	Alive	T2	N0	M0	Stage IB	G2	0	621			TUMOR FREE		68	Cardia/Proximal	Not Available	NO	Not Available	No	TCGA-BR-A4PE	FCE4E670-84BE-4592-AE6C-2B7A59218110	Saratov	Not Available	21	-24986	Not Applicable	0	0
TCGA-HU-A4GP	FEMALE	273	Stomach, Adenocarcinoma, Diffuse Type	Stomach	Alive	T2	N1	M0	Stage IIA	G2	0	273			TUMOR FREE		62	Antrum/Distal	Not Available	Not Available	Not Available	No	TCGA-HU-A4GP	C46FF2BB-BDD0-48CD-B2AE-7EF421B4B91A	Daegu	Not Available	11	-22711	Not Applicable	0	273	TCGA-HU-A4GP-D42595;TCGA-HU-A4GP-D42657	99F8A9B1-DC2D-4C3D-8786-9B67216B7F0A;4CC879C9-B013-45CD-A40F-695CB088FF37	Not Available;Not Available	26;26	362;127	70;70	Didox;Copolang	Stable Disease;Stable Disease	4;4	Not Available;Not Available	Not Available;Not Available	Not Available;Not Available	Not Available;Not Available	Not Applicable;Not Applicable	Not Available;Not Available	Not Available;Not Available	NO;NO	Chemotherapy;Chemotherapy
TCGA-VQ-AA6K	MALE	378	Stomach Adenocarcinoma, Signet Ring Type	Stomach	Dead	T4a	N3a	M0	Stage IIIC	G3	1	332		Locoregional Recurrence	WITH TUMOR		59	Cardia/Proximal	Not Available	NO	Not Available	No	TCGA-VQ-AA6K	83A0F9EF-4BF0-4EFE-8713-F8B6AB4F5773	Barretos	Sao Paulo	26	-21901	378	0	Not Available	TCGA-VQ-AA6K-D64660	29547B3E-086E-46B1-9D0B-A81674996103	Not Available	9	280	136	Fluorouracil	Clinical Progressive Disease	9	Not Available	Not Available	Not Available	Not Available	Not Applicable	Not Available	Not Available	NO	Chemotherapy
TCGA-BR-8677	FEMALE	813	Stomach, Adenocarcinoma, Not Otherwise Specified (NOS)	Stomach	Alive	T3	N3a	M0	Stage IIIB	G3	0	813			TUMOR FREE		74	Antrum/Distal	Not Available	Not Available	Not Available	No	TCGA-BR-8677	e7a3574b-1fcf-4366-adf8-f4330d9be6f8	Kiev	Ukraine	11	-27223	Not Applicable	0	15
TCGA-BR-4294	MALE	0	Stomach, Intestinal Adenocarcinoma, Tubular Type	Stomach	Alive	T2a	NX	M0		G2	0	0			Not Available		65	Fundus/Body	Not Available	NO	Not Available	Not Available	TCGA-BR-4294	acab1362-c8a0-448b-8533-0cd84d97959c	Saratov	Russia	13	-23758	Not Applicable	0	0
TCGA-BR-8592	FEMALE	191	Stomach, Adenocarcinoma, Diffuse Type	Stomach	Dead	T4b	N1	M0	Stage IIIB	G3	0	191			TUMOR FREE		63	Fundus/Body	Not Available	Not Available	Not Available	Unknown	TCGA-BR-8592	a4cd4ff1-0c0e-488d-91d9-0ac8ef3e7bfd	Tver	Russia	31	-23133	Not Applicable	0	6	TCGA-BR-8592-D53276;TCGA-BR-8592-D53277;TCGA-BR-8592-D53278	C914FED2-B0DD-4957-A07E-DB167239AE8F;06B7264E-34CB-4CC7-AB90-8F9174C237EC;7782D6BF-9D71-43B9-9501-593A884F94DE	Not Available;Not Available;Not Available	27;27;27	113;113;113	39;39;39	Etoposide;5-Fluorouracil;Leucovorin	Complete Response;Complete Response;Complete Response	1;1;1	Not Available;Not Available;Not Available	Not Available;Not Available;Not Available	Not Available;Not Available;Not Available	Not Available;Not Available;Not Available	Not Applicable;Not Applicable;Not Applicable	Not Available;Not Available;Not Available	Not Available;Not Available;Not Available	NO;NO;NO	Chemotherapy;Chemotherapy;Ancillary
TCGA-KB-A6F7	FEMALE	1935	Stomach, Intestinal Adenocarcinoma, Not Otherwise Specified (NOS)	Stomach	Alive	T1	N1	M0	Stage IB	G3	0	1935			TUMOR FREE		54	Fundus/Body	Not Available	Not Available	Not Available	No	TCGA-KB-A6F7	197D01A5-321C-461E-9B45-B359288B959A	Toronto	Ontario	19	-19765	Not Applicable	0	1572	TCGA-KB-A6F7-D53982	918103C9-472F-4799-B534-43AE1A9FCBF7	Not Available	16	154	150	Fluorouracil	Complete Response	12	Not Available	Not Available	Not Available	Not Available	Not Applicable	Not Available	Not Available	NO	Chemotherapy
TCGA-BR-4366	MALE	0	Stomach, Adenocarcinoma, Not Otherwise Specified (NOS)	Stomach	Alive	TX	NX	M0		G2	0	0			Not Available		87	Antrum/Distal	Not Available	NO	Not Available	Not Available	TCGA-BR-4366	525a6978-2d7b-4f3a-ac68-13fe8cbbbdcc	Kazan	Russia	6	-32024	Not Applicable	0	0
TCGA-VQ-A8E2	MALE	1319	Stomach, Intestinal Adenocarcinoma, Tubular Type	Stomach	Alive	T3	N2	M0	Stage IIIB	G2	0	1319			TUMOR FREE		57	Fundus/Body	Not Available	NO	Not Available	No	TCGA-VQ-A8E2	C16EED96-8DA8-4D01-B87D-660F46172777	Barretos	Sao Paulo	23	-21112	Not Applicable	0	946	TCGA-VQ-A8E2-D64324	A5F2A67A-C50A-4FA4-AF85-EE0426650DE7	Not Available	28	277	145	Fluorouracil	Complete Response	8	Not Available	Not Available	Not Available	Not Available	Not Applicable	Not Available	Not Available	NO	Chemotherapy
TCGA-BR-8484	MALE	766	Stomach, Adenocarcinoma, Not Otherwise Specified (NOS)	Stomach	Dead	T4a	N1	M0	Stage IIIA	G2	0	766			TUMOR FREE		61	Fundus/Body	Not Available	Not Available	Not Available	No	TCGA-BR-8484	fa00a6a7-d5b0-40b9-8360-d56f7db64d34	Saratov	Russia	31	-22583	Not Applicable	0	22
TCGA-D7-6520	MALE	573	Stomach, Intestinal Adenocarcinoma, Tubular Type	Stomach	Alive	T2b	N2	M0	Stage IIIA	G3	1	46	Liver	Distant Metastasis	Discrepancy		53	Antrum/Distal	Not Available	NO	Not Available	No	TCGA-D7-6520	3c573af6-6298-49de-8de0-6a7f9ce9b000	Poznan	Poland	13	-19467	Not Applicable	0	293	TCGA-D7-6520-D28620;TCGA-D7-6520-D34561;TCGA-D7-6520-D64894;TCGA-D7-6520-D64895;TCGA-D7-6520-D64896;TCGA-D7-6520-D64897;TCGA-D7-6520-D64898	aab4cab8-a128-4320-84d3-ce1829173002;9AE50E97-7268-45C0-8619-DA5B94299BCC;2311DC1E-90DB-488A-8726-9B879BA1FC50;895FC5D5-B15E-475A-BEC8-A98B3CD688F0;BB3A3B0B-8AE9-49DE-8C28-791F348F2375;2A244617-5F9F-456C-9358-C96486AA3678;AB5C6559-7F18-4F29-BBBB-3E8E18B8562A	Not Available;Not Available;Not Available;Not Available;Not Available;Not Available;Not Available	1;23;15;15;15;15;15	172;321;172;172;321;321;321	53;249;53;53;249;249;249	Epirubicin;Cisplatinum;Oxaliplatin;Capecytabinum;Dexamethasone phosphate;Docetaxelum;Fluorouracilum	Not Available;Clinical Progressive Disease;Not Available;Not Available;Clinical Progressive Disease;Clinical Progressive Disease;Clinical Progressive Disease	3;8;9;9;9;9;9	6;Not Available;Not Available;Not Available;Not Available;Not Available;Not Available	87.5;Not Available;Not Available;Not Available;Not Available;Not Available;Not Available	mg;Not Available;Not Available;Not Available;Not Available;Not Available;Not Available	PROGRESSION;Not Available;Not Available;Not Available;Not Available;Not Available;Not Available	Not Applicable;Not Applicable;Not Applicable;Not Applicable;Not Applicable;Not Applicable;Not Applicable	Not Available;Not Available;Not Available;Not Available;Not Available;Not Available;Not Available	IV;Not Available;Not Available;Not Available;Not Available;Not Available;Not Available	NO;NO;NO;NO;NO;NO;NO	Chemotherapy;Chemotherapy;Chemotherapy;Chemotherapy;Chemotherapy;Chemotherapy;Chemotherapy
TCGA-BR-8366	FEMALE	29	Stomach, Adenocarcinoma, Not Otherwise Specified (NOS)	Stomach	Alive	T3	N0	M0	Stage IIA	G3	0	29			TUMOR FREE		80	Fundus/Body	Not Available	Not Available	Not Available	Unknown	TCGA-BR-8366	66c04b8f-42fd-44c5-945b-ee149bcf5dad	Kiev	Ukraine	17	-29394	Not Applicable	0	17
TCGA-D7-6518	MALE	582	Stomach, Adenocarcinoma, Diffuse Type	Stomach	Alive	T2	N3	M0	Stage IIIA	G3	0	582			WITH TUMOR		75	Cardia/Proximal	Not Available	NO	Not Available	Not Available	TCGA-D7-6518	40e507fb-e285-424b-a98b-362e47a53e4a	Poznan	Poland	23	-27594	Not Applicable	0	298
TCGA-BR-7703	MALE	1100	Stomach, Intestinal Adenocarcinoma, Papillary Type	Stomach	Alive	T1b	N0	M0	Stage IA	G2	0	1100			TUMOR FREE		81	Fundus/Body	Not Available	Not Available	Not Available	Not Available	TCGA-BR-7703	2943375e-3de8-4d42-959a-62f4192067ae	Tver	Not Available	25	-29711	Not Applicable	0	14
TCGA-VQ-A8DT	MALE	1484	Stomach, Intestinal Adenocarcinoma, Not Otherwise Specified (NOS)	Stomach	Alive	T3	N3a	M0	Stage IIIB	G3	1	1376	Liver	Distant Metastasis	TUMOR FREE		43	Fundus/Body	Not Available	NO	Not Available	No	TCGA-VQ-A8DT	8027ADC9-4918-45F0-A7DA-5767DA0B999E	Barretos	Sao Paulo	23	-15937	Not Applicable	0	1148	TCGA-VQ-A8DT-D64317	4E65A83C-270A-4A8C-98AF-560BE8C8534C	Not Available	28	222	94	Fluorouracil	Complete Response	8	Not Available	Not Available	Not Available	Not Available	Not Applicable	Not Available	Not Available	NO	Chemotherapy
TCGA-VQ-A94T	MALE	342	Stomach, Adenocarcinoma, Diffuse Type	Stomach	Dead	T3	N2	M0	Stage IIIB	G3	1	296		Locoregional Recurrence	WITH TUMOR		73	Cardia/Proximal	Not Available	NO	Not Available	No	TCGA-VQ-A94T	E6DAA4FA-DCF7-4698-B13F-FDFA4EDA6943	Barretos	Sao Paulo	26	-26702	342	0	Not Available
TCGA-HU-A4H4	FEMALE	725	Stomach, Intestinal Adenocarcinoma, Tubular Type	Stomach	Alive	T2	N2	M0	Stage IIB	G3	0	725			TUMOR FREE		53	Antrum/Distal	Not Available	NO	Not Available	No	TCGA-HU-A4H4	00FDF96D-C48A-47E0-B91D-576C52E6819C	Seoul	Not Available	10	-19665	Not Applicable	0	538	TCGA-HU-A4H4-D41382	18B88DA0-0F13-4A38-AE5B-883CED6838BE	Not Available	26	309	13	TS-1	Complete Response	4	Not Available	Not Available	Not Available	Not Available	Not Applicable	Not Available	Not Available	NO	Chemotherapy
TCGA-RD-A8MW	MALE	1153	Stomach, Intestinal Adenocarcinoma, Not Otherwise Specified (NOS)	Stomach	Dead	T3	N2	M0	Stage IIIB	G3	1	98	Liver	Distant Metastasis	WITH TUMOR		72	Antrum/Distal	Not Available	YES	Proton Pump Inhibitors	No	TCGA-RD-A8MW	0B787BDB-949D-499C-AECE-7A3977FCD198	Melbourne	Victoria	30	-26590	1153	0	Not Available	TCGA-RD-A8MW-D57389	06FF3B8D-396B-4948-9134-9997849CB85C	Not Available	10	96	69	5-FU	Unknown	3	Not Available	Not Available	Not Available	Not Available	Not Applicable	Not Available	Not Available	NO	Chemotherapy
TCGA-ZA-A8F6	MALE	525	Stomach, Intestinal Adenocarcinoma, Not Otherwise Specified (NOS)	Stomach	Alive	T2	N0	MX	Stage IB	G2	0	525			Unknown		71	Antrum/Distal	Not Available	YES	Proton Pump Inhibitors	No	TCGA-ZA-A8F6	9130C730-B0BC-4D3A-9EE1-09BF43D9BD67	Savannah	georgia	19	-26122	Not Applicable	0	128
TCGA-FP-7998	MALE	678	Stomach, Adenocarcinoma, Diffuse Type	Stomach	Alive	T4a	N3a	MX	Stage IIIC	G3	0	678			Not Available		77	Fundus/Body	Not Available	Not Available	Not Available	Not Available	TCGA-FP-7998	b2e2d35c-7a79-4165-97a5-82d5c37d94f2	Tucson	United States	7	-28302	Not Applicable	0	109	TCGA-FP-7998-D46164;TCGA-FP-7998-D46165	23CA0289-C7D4-452E-9D12-140A908B6A89;C2CB4B51-3622-45B8-AABD-79F98468E09B	Not Available;Not Available	2;2	501;501	168;168	Cisplatin;5-FU	Complete Response;Complete Response	8;8	Not Available;Not Available	Not Available;Not Available	Not Available;Not Available	Not Available;Not Available	Not Applicable;Not Applicable	Not Available;Not Available	Not Available;Not Available	NO;NO	Chemotherapy;Chemotherapy
TCGA-RD-A8N6	FEMALE	272	Stomach, Intestinal Adenocarcinoma, Not Otherwise Specified (NOS)	Stomach	Dead	T2	N2	M0	Stage IIIA	G3	1	163	Liver	Distant Metastasis	WITH TUMOR		78	Antrum/Distal	Not Available	YES	Proton Pump Inhibitors	No	TCGA-RD-A8N6	F8557247-91FA-4772-AE14-958D709D9815	Melbourne	Victoria	30	-28834	272	0	Not Available
TCGA-HU-A4GH	MALE	358	Stomach, Intestinal Adenocarcinoma, Tubular Type	Stomach	Alive	T1b	N0	M0	Stage IA	G2	0	358			TUMOR FREE		75	Fundus/Body	Not Available	Not Available	Not Available	No	TCGA-HU-A4GH	D9424178-9CB4-4BFB-9814-BA1AFE7AD954	Daegu	Not Available	11	-27473	Not Applicable	0	358
TCGA-KB-A93H	FEMALE	1145	Stomach, Intestinal Adenocarcinoma, Tubular Type	Stomach	Alive	T3	N1	M0	Stage IIB	G1	0	1145			TUMOR FREE		79	Fundus/Body	Not Available	Not Available	Not Available	No	TCGA-KB-A93H	DE865002-4938-4120-AA15-254FD40F2039	Toronto	Ontario	20	-28966	Not Applicable	0	879
TCGA-BR-8081	FEMALE	981	Stomach, Adenocarcinoma, Not Otherwise Specified (NOS)	Stomach	Alive	T4a	N0	M0	Stage IIB	G2	0	981			TUMOR FREE		71	Fundus/Body	Not Available	Not Available	Not Available	Not Available	TCGA-BR-8081	1d3a03a5-b757-4617-b65a-50f429a0e026	Tver	Russia	2	-26095	Not Applicable	0	14
TCGA-KB-A93J	MALE	1124	Stomach, Adenocarcinoma, Diffuse Type	Stomach	Alive	T2b	N1	M0	Stage II	G3	0	1124			Unknown		78	Other (please specify)	Gastroesophageal Junction and Fundus/Body	Not Available	Not Available	No	TCGA-KB-A93J	5F263B2C-3385-4D07-99C2-D7B613C4A470	Toronto	Ontario	20	-28599	Not Applicable	0	1124	TCGA-KB-A93J-D60968	6DA4D2AD-66A5-4E91-9796-1ABECA4A3CFE	Not Available	20	255	157	5-fluorouracil	Complete Response	6	Not Available	Not Available	Not Available	Not Available	Not Applicable	Not Available	Not Available	NO	Chemotherapy
TCGA-D7-A4YV	FEMALE	180	Stomach, Intestinal Adenocarcinoma, Tubular Type	Stomach	Alive	T3	N1	M0	Stage IIB	G3	0	180			TUMOR FREE		69	Antrum/Distal	Not Available	NO	Not Available	No	TCGA-D7-A4YV	47FD3741-28EA-427B-9C2A-8CB39153C8AB	poznan	Not Available	1	-25421	Not Applicable	0	180
TCGA-BR-8678	MALE	754	Stomach, Adenocarcinoma, Not Otherwise Specified (NOS)	Stomach	Alive	T2	N0	M0	Stage IB	G2	0	754			TUMOR FREE		76	Fundus/Body	Not Available	Not Available	Not Available	Unknown	TCGA-BR-8678	1770adbd-b424-4a88-95f0-768e5f168cee	Saratov	Russia	31	-28037	Not Applicable	0	5
TCGA-FP-A8CX	MALE	7	Stomach Adenocarcinoma, Signet Ring Type	Stomach	Alive	T4b	N3a	MX	Stage IIIC	G3	0	7			TUMOR FREE		60	Fundus/Body	Not Available	YES	Proton Pump Inhibitors	No	TCGA-FP-A8CX	FEB5CCF3-395F-415A-85D3-DB637FCD514F	Tyler	Texas	29	-22000	Not Applicable	0	7
TCGA-HF-7131	FEMALE		Stomach, Adenocarcinoma, Not Otherwise Specified (NOS)	Stomach		T2b	N0	MX	Stage IB	G2	0				TUMOR FREE		Not Available	Gastroesophageal Junction	Not Available	Not Available	Not Available	Not Available	TCGA-HF-7131	06fd3086-0801-4d74-bced-4916efc544d2	Mississauga	Ontario/Canada	17	Not Available	Not Applicable	Not Available	Not Available	TCGA-HF-7131-D19156;TCGA-HF-7131-D19158	1d22a7fe-ae11-4eb8-bcb2-edc28ac33767;7e17cfc1-d4de-46e6-aac8-27d5f48bb252	Not Available;Not Available	17;17	Not Available;Not Available	Not Available;Not Available	Fluorouracil;Leucovorin	Not Available;Not Available	11;11	5;5	820;40	mg;mg	ADJUVANT;ADJUVANT	Not Applicable;Not Applicable	1;1	IV;IV	NO;NO	Chemotherapy;Chemotherapy
TCGA-VQ-A92D	MALE	2032	Stomach, Intestinal Adenocarcinoma, Tubular Type	Stomach	Alive	T2b	N0	M0	Stage IB	G2	0	2032			TUMOR FREE		67	Cardia/Proximal	Not Available	NO	Not Available	No	TCGA-VQ-A92D	ABA9439A-EA8D-404F-9FAF-EB71A306684D	Barretos	Sao Paulo	22	-24595	Not Applicable	0	1683
TCGA-HJ-7597	FEMALE	805	Stomach Adenocarcinoma, Signet Ring Type	Stomach	Dead	T2b	N0	MX	Stage IB	G3	1	231		Locoregional Recurrence	WITH TUMOR		71	Fundus/Body	Not Available	YES	Proton Pump Inhibitors;Antacids	Yes	TCGA-HJ-7597	83d681f4-6c0e-45cc-a31d-0b1b31c8e073	Buffalo	New York	31	-26264	805	0	Not Available	TCGA-HJ-7597-D32547;TCGA-HJ-7597-D32549;TCGA-HJ-7597-D32554	91F08499-C9F4-4179-977F-A1A96392F19B;370C9E04-8F29-4DBD-B78D-2E2E01B3FD0B;6DDED852-7857-49FD-9A3B-BE565DE984C0	Not Available;Not Available;Not Available	31;31;31	471;471;795	296;296;793	fluorouracil;camptosar;methotrexate	Complete Response;Complete Response;Clinical Progressive Disease	5;5;5	Not Available;Not Available;Not Available	Not Available;Not Available;Not Available	Not Available;Not Available;Not Available	Not Available;Not Available;Not Available	Not Applicable;Not Applicable;Not Applicable	Not Available;Not Available;Not Available	Not Available;Not Available;Not Available	NO;NO;NO	Chemotherapy;Chemotherapy;Chemotherapy
TCGA-RD-A7BT	MALE	262	Stomach, Intestinal Adenocarcinoma, Not Otherwise Specified (NOS)	Stomach	Dead	T3	N3	M0	Stage IV	G3	1	123	Liver	Distant Metastasis	WITH TUMOR		66	Fundus/Body	Not Available	YES	Proton Pump Inhibitors	No	TCGA-RD-A7BT	018F93AD-92EF-4BBB-A0FB-DC407A289DAA	Melbourne	Victoria	29	-24107	262	0	Not Available
TCGA-D7-6528	FEMALE	463	Stomach, Intestinal Adenocarcinoma, Tubular Type	Stomach	Alive	T2	N0	M0	Stage IB	G2	0	463			TUMOR FREE		70	Fundus/Body	Not Available	NO	Not Available	No	TCGA-D7-6528	35496e4e-598f-4ffc-b11e-8edaeb676079	Poznan	Poland	16	-25815	Not Applicable	0	51
TCGA-VQ-A8P3	MALE	1132	Stomach, Intestinal Adenocarcinoma, Tubular Type	Stomach	Alive	T4	N1	M0	Stage IIIA	G2	0	1132			TUMOR FREE		72	Fundus/Body	Not Available	NO	Not Available	No	TCGA-VQ-A8P3	5C68E3E4-58F7-4699-989D-80D2E4996794	Barretos	Sao Paulo	26	-26582	Not Applicable	0	723	TCGA-VQ-A8P3-D64335	C18D0623-C8DB-4FCD-A983-6DAFF2074744	Not Available	28	254	124	Fluorouracil	Complete Response	8	Not Available	Not Available	Not Available	Not Available	Not Applicable	Not Available	Not Available	NO	Chemotherapy
TCGA-BR-8686	MALE	635	Stomach, Intestinal Adenocarcinoma, Tubular Type	Stomach	Dead	T4b	N1	M0	Stage IIIB	G3	0	635			TUMOR FREE		69	Antrum/Distal	Not Available	Unknown	Not Available	No	TCGA-BR-8686	7c7cef85-024c-48c0-8644-92c034432e8f	Hanoi	Vietnam	11	-25372	Not Applicable	0	17
TCGA-SW-A7EA	FEMALE	579	Stomach, Adenocarcinoma, Diffuse Type	Stomach	Alive	T2	N0	M0	Stage IB	GX	0	579			Unknown		61	Antrum/Distal	Not Available	Not Available	Not Available	No	TCGA-SW-A7EA	76C666E8-75C0-4E82-978C-1E346435B0FA	Chisinau	Moldova	3	-22294	Not Applicable	0	13
TCGA-CG-4462	FEMALE	0	Stomach, Adenocarcinoma, Diffuse Type	Stomach	Dead	T3	N3	M1	Stage IV	G3	0	0			WITH TUMOR		72	Discrepancy	Not Available	Not Available	Not Available	Not Available	TCGA-CG-4462	e9ea3687-0db3-47f3-8099-b4fc054397f1	Hamburg	Germany	22	-26511	0	0	Not Available
TCGA-D7-A4YX	MALE	1108	Stomach, Adenocarcinoma, Not Otherwise Specified (NOS)	Stomach	Alive	T3	N1	M0	Stage IIB	G3	0	1108			TUMOR FREE		63	Fundus/Body	Not Available	NO	Not Available	No	TCGA-D7-A4YX	2B4F014F-74E9-4DDA-A1AD-ABCBD124FC44	Poznan	Not Available	24	-23249	Not Applicable	0	244
TCGA-BR-4187	MALE	141	Stomach, Adenocarcinoma, Not Otherwise Specified (NOS)	Stomach	Dead	TX	NX	M0		G3	0	141			Not Available		56	Antrum/Distal	Not Available	NO	Not Available	Not Available	TCGA-BR-4187	12071070-d06b-4c7b-a7b1-77c84963abe6	Kazan	Russia	2	-20635	Not Applicable	0	0
TCGA-D7-8579	FEMALE	636	Stomach, Intestinal Adenocarcinoma, Not Otherwise Specified (NOS)	Stomach	Alive	T2	N2	M0	Stage IIB	G2	0	636			TUMOR FREE		66	Antrum/Distal	Not Available	NO	Not Available	No	TCGA-D7-8579	81a7f6a2-e44c-43d6-b687-01158eaf44ee	Poznan	Poland	24	-24120	Not Applicable	0	146	TCGA-D7-8579-D52679	F6774DC9-E844-4EF4-BD30-965D1E0FDEB6	Not Available	5	213	97	5-fluorouracilum	Complete Response	12	Not Available	Not Available	Not Available	Not Available	Not Applicable	Not Available	Not Available	NO	Chemotherapy
TCGA-D7-A6EX	FEMALE	344	Stomach, Intestinal Adenocarcinoma, Tubular Type	Stomach	Alive	T3	N2	M0	Stage IIIA	G3	0	344			TUMOR FREE		72	Antrum/Distal	Not Available	NO	Not Available	No	TCGA-D7-A6EX	1B391187-1D9A-4428-BA9A-EF1800F17D3E	poznan	wlkp	28	-26525	Not Applicable	0	344
TCGA-CG-4442	MALE	0	Stomach, Intestinal Adenocarcinoma, Not Otherwise Specified (NOS)	Stomach	Alive	T2	N0	M0	Stage IB	G3	0	0			TUMOR FREE		85	Antrum/Distal	Not Available	Not Available	Not Available	Not Available	TCGA-CG-4442	8fccff71-3710-4cb9-b8af-61707aebe5d8	Hamburg	Germany	22	-31350	Not Applicable	0	0
TCGA-BR-8296	FEMALE	474	Stomach, Intestinal Adenocarcinoma, Not Otherwise Specified (NOS)	Stomach	Dead	T4b	N2	M0	Stage IIIC	G3	1	390	Liver	Distant Metastasis	WITH TUMOR		58	Fundus/Body	Not Available	Unknown	Not Available	Unknown	TCGA-BR-8296	2688d563-b052-440b-a810-873b1cd3666d	Tver	Russia	7	-21527	Not Applicable	0	45	TCGA-BR-8296-D53160;TCGA-BR-8296-D53167;TCGA-BR-8296-D53166	883E7772-5357-421B-85DA-331D4187433B;911881EA-DF47-4C2D-9EDD-9E3CE3FCE56E;D1885FC4-DF71-4086-8FAB-F30BB5DF3D78	Not Available;Not Available;Not Available	24;24;24	180;180;180	44;44;44	Etoposide;5-Fluorouracil;Leucovorin	Complete Response;Complete Response;Complete Response	1;1;1	Not Available;Not Available;Not Available	Not Available;Not Available;Not Available	Not Available;Not Available;Not Available	Not Available;Not Available;Not Available	Not Applicable;Not Applicable;Not Applicable	Not Available;Not Available;Not Available	Not Available;Not Available;Not Available	NO;NO;NO	Chemotherapy;Chemotherapy;Ancillary
TCGA-VQ-A8PH	MALE	389	Stomach, Intestinal Adenocarcinoma, Tubular Type	Stomach	Dead	T3	N3	M0	Stage IIIB	G2	1	377		Locoregional Recurrence	WITH TUMOR		62	Antrum/Distal	Not Available	NO	Not Available	No	TCGA-VQ-A8PH	52849C60-7E30-4BA4-9DAE-BE4ADF031120	Barretos	Sao Paulo	30	-22940	389	0	Not Available
TCGA-FP-8209	MALE	1811	Stomach, Adenocarcinoma, Diffuse Type	Stomach	Dead	T2a	N0	M0	Stage IB	G3	1	1676	Liver	Distant Metastasis	WITH TUMOR		49	Antrum/Distal	Not Available	YES	Proton Pump Inhibitors	Not Available	TCGA-FP-8209	233cb00f-b470-47fb-ad93-2a1597655ed6	Indianapolis	United States	17	-18171	1811	0	Not Available	TCGA-FP-8209-D32948;TCGA-FP-8209-D32949	AE7DED9A-F501-4686-AAF2-85D5C096A93C;7BB42B9B-770C-4432-81A5-F2047CC83293	Not Available;Not Available	17;17	Not Available;Not Available	31;31	5-FU;Leucovorin	Complete Response;Complete Response	6;6	Not Available;Not Available	Not Available;Not Available	Not Available;Not Available	Not Available;Not Available	Not Applicable;Not Applicable	Not Available;Not Available	Not Available;Not Available	NO;NO	Chemotherapy;Chemotherapy
TCGA-D7-A6F0	FEMALE	678	Stomach, Intestinal Adenocarcinoma, Not Otherwise Specified (NOS)	Stomach	Alive	T2	N0	M0	Stage IB	G3	0	678			TUMOR FREE		79	Cardia/Proximal	Not Available	NO	Not Available	No	TCGA-D7-A6F0	B1FEE7AF-8030-4D93-94AC-6294683D4298	poznan	wlkp	31	-28923	Not Applicable	0	90
TCGA-RD-A7BW	FEMALE	156	Stomach, Adenocarcinoma, Diffuse Type	Stomach	Dead	T2	N0	M0	Stage IB	G3	0	156			TUMOR FREE		68	Fundus/Body	Not Available	NO	Not Available	No	TCGA-RD-A7BW	B54FE07A-F63D-4861-878A-8E8322E32FED	Melbourne	Victoria	29	-25036	156	0	Not Available	TCGA-RD-A7BW-D56636;TCGA-RD-A7BW-D56638;TCGA-RD-A7BW-D56639	4D7D4678-00EC-4BE4-B5DD-7EDF38A98397;D7476D03-9828-4485-AA40-446B8916495B;FA492B70-B82D-41BF-B606-E58BDDD9B4CE	Not Available;Not Available;Not Available	16;16;16	124;49;49	49;49;49	5-FU;Epirubicin;Cisplatin	Unknown;Unknown;Unknown	2;2;2	Not Available;Not Available;Not Available	Not Available;Not Available;Not Available	Not Available;Not Available;Not Available	Not Available;Not Available;Not Available	Not Applicable;Not Applicable;Not Applicable	Not Available;Not Available;Not Available	Not Available;Not Available;Not Available	NO;NO;NO	Chemotherapy;Chemotherapy;Chemotherapy
TCGA-BR-7723	MALE	874	Stomach, Adenocarcinoma, Not Otherwise Specified (NOS)	Stomach	Dead	T3	N3a	M0	Stage IIIB	G3	1	559	Liver	Distant Metastasis	TUMOR FREE		59	Fundus/Body	Not Available	Not Available	Not Available	Not Available	TCGA-BR-7723	bb3729fe-2fa2-47fc-afde-c14036cb84f5	Kiev	Not Available	21	-21839	Not Applicable	0	139	TCGA-BR-7723-D35684;TCGA-BR-7723-D35685;TCGA-BR-7723-D35687	DA50050C-6CA2-4E7B-B9D1-287A598AFDBB;9FB5C566-828D-41C2-935A-729E2604E0BD;B103EE4D-DE41-4C61-AD3C-414254C85244	Not Available;Not Available;Not Available	5;5;5	564;564;564	559;559;559	Etoposide;Carboplatin;5-Fluorouracil	Unknown;Unknown;Unknown	10;10;10	Not Available;Not Available;Not Available	Not Available;Not Available;Not Available	Not Available;Not Available;Not Available	Not Available;Not Available;Not Available	Not Applicable;Not Applicable;Not Applicable	Not Available;Not Available;Not Available	Not Available;Not Available;Not Available	NO;NO;NO	Chemotherapy;Chemotherapy;Chemotherapy
TCGA-MX-A666	MALE	427	Stomach, Adenocarcinoma, Not Otherwise Specified (NOS)	Stomach	Alive	T2	NX	MX	Stage IIA	G2	0	427			TUMOR FREE		61	Other (please specify)	Cardia/Proximal and Incisura	YES	Proton Pump Inhibitors	No	TCGA-MX-A666	D04E2E8C-9D58-4514-8AB7-3642289D4DE0	New York	New York	3	-22288	Not Applicable	0	70	TCGA-MX-A666-D61117;TCGA-MX-A666-D61118;TCGA-MX-A666-D61119;TCGA-MX-A666-D61120;TCGA-MX-A666-D61121	F6F569B1-0554-470A-8DDE-0AD8A839EC11;5F6546A3-D921-4E6A-85D8-89866B9D9827;9433FAAF-66EA-44D6-9D23-E9B5C83C7633;8041D0BE-7BC8-4D3B-96A7-A1EA8B8EE0EA;CF6DE4EA-0F57-460D-A170-DEB48D99280B	Not Available;Not Available;Not Available;Not Available;Not Available	24;24;24;24;24	22;22;22;131;131	22;22;22;117;117	Epirubicin;Oxaliplatin;Capecitabine;Fluorouracil;Leucovorin	Stable Disease;Stable Disease;Stable Disease;Complete Response;Complete Response	6;6;6;6;6	Not Available;Not Available;Not Available;Not Available;Not Available	Not Available;Not Available;Not Available;Not Available;Not Available	Not Available;Not Available;Not Available;Not Available;Not Available	Not Available;Not Available;Not Available;Not Available;Not Available	Not Applicable;Not Applicable;Not Applicable;Not Applicable;Not Applicable	Not Available;Not Available;Not Available;Not Available;Not Available	Not Available;Not Available;Not Available;Not Available;Not Available	NO;NO;NO;NO;NO	Chemotherapy;Chemotherapy;Chemotherapy;Chemotherapy;Ancillary
TCGA-CG-5732	MALE	2100	Stomach, Intestinal Adenocarcinoma, Not Otherwise Specified (NOS)	Stomach	Dead	T2	N3	M0	Stage IV	G2	1	1949			TUMOR FREE		66	Cardia/Proximal	Not Available	YES	Proton Pump Inhibitors	No	TCGA-CG-5732	e62d5f3c-0a99-4932-a589-bff4fa02b1d3	Hamburg	Germany	22	-24379	Not Applicable	0	1674	TCGA-CG-5732-D37590;TCGA-CG-5732-D37591;TCGA-CG-5732-D37592;TCGA-CG-5732-D37593;TCGA-CG-5732-D37594	609D8C85-26DE-432C-9FE0-E18EAA150E2A;D14745F0-59EE-45E0-A1FA-25700BC24934;778332E6-A480-4F21-AB69-BB6BDEE373F4;83DEEF80-C1C0-4AFF-B8E8-F37541ADE93A;1387F8E8-9C86-49C8-A102-24354B63F116	Not Available;Not Available;Not Available;Not Available;Not Available	4;4;4;4;4	427;2070;2070;2070;2070	366;1949;1949;1949;2070	Mitomycin;5-Fluorouracil;Folinic acid;Cisplatin;Docetaxel	Complete Response;Clinical Progressive Disease;Clinical Progressive Disease;Clinical Progressive Disease;Clinical Progressive Disease	12;12;12;12;12	Not Available;Not Available;Not Available;Not Available;Not Available	Not Available;Not Available;Not Available;Not Available;Not Available	Not Available;Not Available;Not Available;Not Available;Not Available	Not Available;Not Available;Not Available;Not Available;Not Available	Not Applicable;Not Applicable;Not Applicable;Not Applicable;Not Applicable	Not Available;Not Available;Not Available;Not Available;Not Available	Not Available;Not Available;Not Available;Not Available;Not Available	NO;NO;NO;NO;NO	Chemotherapy;Chemotherapy;Chemotherapy;Chemotherapy;Chemotherapy
TCGA-BR-8297	MALE	225	Stomach, Adenocarcinoma, Diffuse Type	Stomach	Alive	T4b	N3a	M0	Stage IIIC	GX	1				WITH TUMOR		58	Fundus/Body	Not Available	Unknown	Not Available	Unknown	TCGA-BR-8297	304aab66-4a2a-4b9f-af87-4a591d518ca1	Tver	Russia	13	-21224	Not Applicable	0	23	TCGA-BR-8297-D53178;TCGA-BR-8297-D53182;TCGA-BR-8297-D53190	5136C06C-8AAC-4409-B8E6-093BD0F0AD51;ABB09F9E-B07E-49A4-8596-AA2B28F56838;8CF026A8-C838-4DFC-B518-BEEBF4DF9F00	Not Available;Not Available;Not Available	10;10;10	97;97;97	67;67;67	Etoposide;5-Fluorouracil;Leucovorin	Clinical Progressive Disease;Clinical Progressive Disease;Clinical Progressive Disease	12;12;12	Not Available;Not Available;Not Available	Not Available;Not Available;Not Available	Not Available;Not Available;Not Available	Not Available;Not Available;Not Available	Not Applicable;Not Applicable;Not Applicable	Not Available;Not Available;Not Available	Not Available;Not Available;Not Available	NO;NO;NO	Chemotherapy;Chemotherapy;Ancillary
TCGA-RD-A7BS	MALE	336	Stomach, Adenocarcinoma, Diffuse Type	Stomach	Dead	T3	N1	M0	Stage IIIA	G3	1	244	Liver	Distant Metastasis	WITH TUMOR		46	Gastroesophageal Junction	Not Available	YES	Proton Pump Inhibitors	Yes	TCGA-RD-A7BS	AA3D2D17-19E3-4B76-8235-98550F49DC91	Melbourne	Victoria	29	-16847	336	0	Not Available	TCGA-RD-A7BS-D56619	1D674365-2868-4EC5-B273-CCF8CB678B03	Not Available	16	104	74	5-FU	Unknown	2	Not Available	Not Available	Not Available	Not Available	Not Applicable	Not Available	Not Available	NO	Chemotherapy
TCGA-VQ-A925	MALE	138	Stomach, Intestinal Adenocarcinoma, Tubular Type	Stomach	Dead	T3	N2	M0	Stage IIIA	G2	0	138			WITH TUMOR		66	Antrum/Distal	Not Available	NO	Not Available	No	TCGA-VQ-A925	012921DA-962C-462C-9C36-D0F21B23C028	Barretos	Sao Paulo	22	-24230	138	0	Not Available
TCGA-HU-A4GD	MALE	692	Stomach, Intestinal Adenocarcinoma, Tubular Type	Stomach	Alive	T3	N1	M0	Stage IIB	G3	1	399	Liver	Distant Metastasis	WITH TUMOR		56	Antrum/Distal	Not Available	Not Available	Not Available	No	TCGA-HU-A4GD	AA88CE53-8439-40BD-8D93-E1D903D1C7FB	Daegu	Not Available	11	-20700	Not Applicable	0	429	TCGA-HU-A4GD-D42586;TCGA-HU-A4GD-D42587;TCGA-HU-A4GD-D42588;TCGA-HU-A4GD-D42653;TCGA-HU-A4GD-D42654	20650429-0759-41B3-BCA9-547FE96DD7FC;5DF77FF1-7DDB-40D9-A9C6-5F96966B4FE6;9424FF14-F579-4CF0-8D66-88E9105B1E8E;07758E26-643E-46E4-AA92-5B17FC122DA6;D36050A1-145A-4446-9352-8F7916DB47F4	Not Available;Not Available;Not Available;Not Available;Not Available	26;26;26;26;26	76;397;381;Not Available;Not Available	20;90;90;468;468	Micomycin;Doxifluridine;Copolang;Eloxatin;Xeloda	Stable Disease;Stable Disease;Stable Disease;Not Applicable;Not Applicable	4;4;4;4;4	Not Available;Not Available;Not Available;Not Available;Not Available	Not Available;Not Available;Not Available;Not Available;Not Available	Not Available;Not Available;Not Available;Not Available;Not Available	Not Available;Not Available;Not Available;Not Available;Not Available	Not Applicable;Not Applicable;Not Applicable;Not Applicable;Not Applicable	Not Available;Not Available;Not Available;Not Available;Not Available	Not Available;Not Available;Not Available;Not Available;Not Available	NO;NO;NO;YES;YES	Chemotherapy;Chemotherapy;Chemotherapy;Chemotherapy;Chemotherapy
TCGA-CG-4441	MALE	426	Stomach, Intestinal Adenocarcinoma, Not Otherwise Specified (NOS)	Stomach	Dead	T2	N2	M0	Stage IIIA	G2	0	426			Not Available		83	Fundus/Body	Not Available	Not Available	Not Available	Not Available	TCGA-CG-4441	37e22429-efd7-4d6a-b79a-9d8c7be2170c	Hamburg	Germany	22	-30528	426	0	Not Available
TCGA-BR-8690	FEMALE	325	Stomach, Adenocarcinoma, Not Otherwise Specified (NOS)	Stomach	Alive	T3	N3a	M0	Stage IIIB	G2	0	325			TUMOR FREE		54	Cardia/Proximal	Not Available	Not Available	Not Available	No	TCGA-BR-8690	337819d2-5281-4b41-9583-a476924bc837	Kiev	Ukraine	11	-19855	Not Applicable	0	18	TCGA-BR-8690-D48712;TCGA-BR-8690-D48713;TCGA-BR-8690-D48714;TCGA-BR-8690-D48720	7FF54FB1-80DD-4E70-B211-7EBC8955C5C9;74EE5D8C-B363-406C-A99B-953F95273FC2;C0D1267D-9626-45F5-B66D-CB6580F1A8F5;65D1D06D-D48A-4C86-B6C2-D1AAB0F0F5CB	Not Available;Not Available;Not Available;Not Available	19;19;19;19	196;122;122;122	58;118;58;118	Carboplatin;Etoposide;5-Fluorouracil;Leucovorin	Complete Response;Complete Response;Complete Response;Complete Response	9;9;9;9	Not Available;Not Available;Not Available;Not Available	Not Available;Not Available;Not Available;Not Available	Not Available;Not Available;Not Available;Not Available	Not Available;Not Available;Not Available;Not Available	Not Applicable;Not Applicable;Not Applicable;Not Applicable	Not Available;Not Available;Not Available;Not Available	Not Available;Not Available;Not Available;Not Available	NO;NO;NO;NO	Chemotherapy;Chemotherapy;Chemotherapy;Ancillary
TCGA-BR-8077	FEMALE	21	Stomach, Intestinal Adenocarcinoma, Not Otherwise Specified (NOS)	Stomach	Alive	T4b	N1	M0	Stage IIIB	G2	0	21			TUMOR FREE		58	Fundus/Body	Not Available	Not Available	Not Available	Not Available	TCGA-BR-8077	faed873e-a019-49c0-95a9-e9880fc23093	Tver	Russia	2	-21413	Not Applicable	0	21
TCGA-VQ-A8E3	MALE	661	Stomach, Intestinal Adenocarcinoma, Not Otherwise Specified (NOS)	Stomach	Dead	T3	N0	M0	Stage IIA	G3	1	538		Locoregional Recurrence	Unknown		79	Antrum/Distal	Not Available	NO	Not Available	No	TCGA-VQ-A8E3	E9B3822B-699D-412F-ABD2-DF399EFCCE8C	Barretos	Sao Paulo	22	-28919	661	0	Not Available
TCGA-VQ-A8PJ	MALE	82	Stomach, Intestinal Adenocarcinoma, Tubular Type	Stomach	Dead	T4	N2	M1	Stage IV	GX	0	82			WITH TUMOR		53	Fundus/Body	Not Available	NO	Not Available	No	TCGA-VQ-A8PJ	0CD4B4A2-D3CE-4FC4-B899-BBCECB2B3D55	Barretos	Sao Paulo	30	-19390	82	0	Not Available
TCGA-CG-4438	MALE	1645	Stomach, Intestinal Adenocarcinoma, Not Otherwise Specified (NOS)	Stomach	Alive	T4	N2	M0	Stage IV	G3	0	1645			Not Available		56	Antrum/Distal	Not Available	Not Available	Not Available	Not Available	TCGA-CG-4438	0246823f-99f4-4a46-b2b1-27f81179584c	Hamburg	Germany	Discrepancy	-20574	Not Applicable	0	1645
TCGA-VQ-A91E	FEMALE	664	Stomach, Intestinal Adenocarcinoma, Tubular Type	Stomach	Alive	T4b	N0	M0	Stage IIIB	G3	0	664			TUMOR FREE		67	Antrum/Distal	Not Available	NO	Not Available	No	TCGA-VQ-A91E	2E04B48C-0805-4965-8AFA-C5FCD32993C5	Barretos	Sao Paulo	23	-24549	Not Applicable	0	264	TCGA-VQ-A91E-D64374	8DC05F0E-3518-41BC-916D-6AE3A1CAE36C	Not Available	29	59	59	Fluorouracil	Complete Response	8	Not Available	Not Available	Not Available	Not Available	Not Applicable	Not Available	Not Available	NO	Chemotherapy
TCGA-RD-A8N0	FEMALE	1236	Stomach, Adenocarcinoma, Diffuse Type	Stomach	Alive	T3	N2	M0	Stage IIIB	G3	0	1236			TUMOR FREE		53	Fundus/Body	Not Available	YES	Proton Pump Inhibitors	No	TCGA-RD-A8N0	2360C1E2-90F5-4737-9486-3F4590C37322	Melbourne	Victoria	28	-19491	Not Applicable	0	1236	TCGA-RD-A8N0-D57397;TCGA-RD-A8N0-D57398;TCGA-RD-A8N0-D57399	AA7457EC-1BB2-45D5-A83A-538089EF1A1F;51EAECCB-B1A8-45C0-B136-030CEF61EEA7;20F89BF8-7551-4683-ABB8-6301CCD2154B	Not Available;Not Available;Not Available	10;10;10	64;64;123	64;64;64	Cisplatin;Epirubicin;5-FU	Unknown;Unknown;Unknown	3;3;3	Not Available;Not Available;Not Available	Not Available;Not Available;Not Available	Not Available;Not Available;Not Available	Not Available;Not Available;Not Available	Not Applicable;Not Applicable;Not Applicable	Not Available;Not Available;Not Available	Not Available;Not Available;Not Available	NO;NO;NO	Chemotherapy;Chemotherapy;Chemotherapy
TCGA-HU-A4G9	FEMALE	736	Stomach, Intestinal Adenocarcinoma, Tubular Type	Stomach	Alive	T1a	N0	M0	Stage IA	G2	0	736			TUMOR FREE		67	Fundus/Body	Not Available	Not Available	Not Available	No	TCGA-HU-A4G9	8114D553-4025-4C8F-AE02-5ED01720723A	Daegu	Not Available	10	-24753	Not Applicable	0	463
TCGA-D7-8574	MALE	523	Stomach, Adenocarcinoma, Not Otherwise Specified (NOS)	Stomach	Alive	T2	N3a	M0	Stage IIIA	G3	0	523			TUMOR FREE		72	Antrum/Distal	Not Available	YES	H2 Blockers	No	TCGA-D7-8574	a873475c-b2c7-4c84-bd89-5b9ee6060ce1	Poznan	Poland	23	-26586	Not Applicable	0	128
TCGA-BR-8284	FEMALE	245	Stomach, Intestinal Adenocarcinoma, Not Otherwise Specified (NOS)	Stomach	Dead	T4a	N3a	M0	Stage IIIC	G3	0	245			TUMOR FREE		72	Antrum/Distal	Not Available	Not Available	Not Available	Unknown	TCGA-BR-8284	a89e46f4-4808-41e5-a047-acebf8744eb7	Tver	Russia	31	-26526	Not Applicable	0	22
TCGA-CD-5802	MALE	406	Stomach, Adenocarcinoma, Not Otherwise Specified (NOS)	Stomach	Alive	T3	N0	M0	Stage II	G2	0	406			TUMOR FREE		58	Cardia/Proximal	Not Available	Not Available	Not Available	Not Available	TCGA-CD-5802	0aecac64-5982-4d76-8f31-958f6a00951d	Not Available	Vietnam	8	-21331	Not Applicable	0	9	TCGA-CD-5802-D71012;TCGA-CD-5802-D71013;TCGA-CD-5802-D71014	8C28E613-9630-474D-8414-CAA50E0F473E;FD070DE3-6A25-4733-BAF5-E0D9DB5874B8;44EE0CF3-EBD9-431B-82A9-D1E0F9C19ED9	Not Available;Not Available;Not Available	12;12;12	217;217;217	123;123;123	Epirubicin;Cisplatin;5-Flourouracil	Complete Response;Complete Response;Complete Response	3;3;3	Not Available;Not Available;Not Available	Not Available;Not Available;Not Available	Not Available;Not Available;Not Available	Not Available;Not Available;Not Available	Not Applicable;Not Applicable;Not Applicable	Not Available;Not Available;Not Available	Not Available;Not Available;Not Available	NO;NO;NO	Chemotherapy;Chemotherapy;Chemotherapy
TCGA-BR-8285	FEMALE	17	Stomach, Intestinal Adenocarcinoma, Not Otherwise Specified (NOS)	Stomach	Dead	T4a	N3a	M0	Stage IIIC	G3	0	17			TUMOR FREE		57	Fundus/Body	Not Available	Unknown	Unknown	Unknown	TCGA-BR-8285	9f4e471e-2397-4604-b0b9-c7e0c45a5d69	Tver	Russia	31	-20849	Not Applicable	0	8
TCGA-BR-6802	MALE	940	Stomach, Adenocarcinoma, Not Otherwise Specified (NOS)	Stomach	Alive	T3	N2	M0	Stage IIIA	G3	1	807	Non-regional / Distant Lymph Nodes	Distant Metastasis	TUMOR FREE		65	Fundus/Body	Not Available	Not Available	Not Available	Not Available	TCGA-BR-6802	7c831a1d-3253-4af4-a0ff-7fe9ff9af1ce	Tver	Russia	25	-23915	Not Applicable	0	23	TCGA-BR-6802-D55551;TCGA-BR-6802-D55552;TCGA-BR-6802-D55554	C441D6D1-CFEC-4B73-B8F3-3F8611A92695;87FBC3EE-A36B-487B-9AAD-EF6CF8BFA1E5;3DC5F8EC-083B-4BDA-8B47-2CCB843ECD9C	Not Available;Not Available;Not Available	8;8;8	854;854;940	847;847;875	Leucovorin;5-Fluorouracil;Xeloda	Complete Response;Complete Response;Complete Response	1;1;1	Not Available;Not Available;Not Available	Not Available;Not Available;Not Available	Not Available;Not Available;Not Available	Not Available;Not Available;Not Available	Not Applicable;Not Applicable;Not Applicable	Not Available;Not Available;Not Available	Not Available;Not Available;Not Available	NO;NO;NO	Ancillary;Chemotherapy;Chemotherapy
TCGA-BR-8683	MALE	300	Stomach, Intestinal Adenocarcinoma, Tubular Type	Stomach	Dead	T4a	N2	M0	Stage IIIB	G3	0	300			TUMOR FREE		75	Antrum/Distal	Not Available	Unknown	Not Available	No	TCGA-BR-8683	84d32a4c-023b-4563-9eb5-e2f47818142a	Hanoi	Vietnam	11	-27549	Not Applicable	0	18
TCGA-BR-8365	FEMALE	533	Stomach, Adenocarcinoma, Not Otherwise Specified (NOS)	Stomach	Dead	T3	N0	M0	Stage IIA	G3	1				TUMOR FREE		70	Fundus/Body	Not Available	Unknown	Not Available	Unknown	TCGA-BR-8365	55a2c884-49a7-4d1a-9e0e-42f6a8b720fa	Kiev	Ukraine	17	-25725	Not Applicable	0	90
TCGA-VQ-A91W	MALE	1851	Stomach, Intestinal Adenocarcinoma, Not Otherwise Specified (NOS)	Stomach	Alive	T3	N1	M0	Stage IIIA	G2	0	1851			Unknown		30	Fundus/Body	Not Available	NO	Not Available	No	TCGA-VQ-A91W	7861DCA2-BADC-4575-A388-621D3614A8E4	Barretos	Sao Paulo	23	-10963	Not Applicable	0	224	TCGA-VQ-A91W-D64384	482DA894-9EEF-4A33-9B3B-5A9D9FAF50A1	Not Available	29	217	87	Fluorouracil	Complete Response	8	Not Available	Not Available	Not Available	Not Available	Not Applicable	Not Available	Not Available	NO	Chemotherapy
TCGA-BR-8364	FEMALE	675	Stomach, Adenocarcinoma, Diffuse Type	Stomach	Alive	T4b	N2	M0	Stage IIIC	G3	0	675			TUMOR FREE		42	Fundus/Body	Not Available	Not Available	Not Available	Unknown	TCGA-BR-8364	632f51b3-8ef4-4b6e-a992-c81e554507ed	Tver	Russia	31	-15389	Not Applicable	0	67
TCGA-D7-6519	FEMALE	625	Stomach, Adenocarcinoma, Diffuse Type	Stomach	Alive	T2	N1	M0		G3	1	429	Liver	Distant Metastasis	WITH TUMOR		64	Cardia/Proximal	Not Available	NO	Not Available	No	TCGA-D7-6519	e37cae9e-0656-4b89-b326-739a5cc859e0	Poznan	Poland	15	-23413	Not Applicable	0	476	TCGA-D7-6519-D28942;TCGA-D7-6519-D28941	7b1d3fbd-a2f3-4950-94ed-2e01f7943809;0e1ae485-c9c4-4665-a77b-2a9b69122808	Not Available;Not Available	2;2	Not Available;237	503;55	5-FU+ etoposidium;5-FU	Not Available;Not Available	3;3	2;6	500+120;425	mg/m2;mg/m2	PALLIATIVE;ADJUVANT	Not Applicable;Not Applicable	Not Available;Not Available	IV;IV	YES;NO	Chemotherapy;Chemotherapy
TCGA-BR-8372	MALE	951	Stomach, Adenocarcinoma, Not Otherwise Specified (NOS)	Stomach	Alive	T4b	N3a	M0	Stage IIIC	G3	0	951			TUMOR FREE		63	Fundus/Body	Not Available	Not Available	Not Available	Unknown	TCGA-BR-8372	5b52f882-df12-42ec-a000-ff3b428ba05b	Tver	Russia	17	-23346	Not Applicable	0	18	TCGA-BR-8372-D53201;TCGA-BR-8372-D53202;TCGA-BR-8372-D53204	4DB82487-E263-4102-99E7-7EC2DAB13F5B;B686B5C4-1EBD-4647-8AA4-CE4A544BEABF;6D0352BA-28AF-4EBC-863E-FC948E4F7720	Not Available;Not Available;Not Available	10;10;10	174;174;174	31;31;31	Etoposide;5-Fluorouracil;Leucovorin	Complete Response;Complete Response;Complete Response	12;12;12	Not Available;Not Available;Not Available	Not Available;Not Available;Not Available	Not Available;Not Available;Not Available	Not Available;Not Available;Not Available	Not Applicable;Not Applicable;Not Applicable	Not Available;Not Available;Not Available	Not Available;Not Available;Not Available	NO;NO;NO	Chemotherapy;Chemotherapy;Ancillary
TCGA-BR-7704	FEMALE	1072	Stomach, Intestinal Adenocarcinoma, Not Otherwise Specified (NOS)	Stomach	Alive	T3	N0	M0	Stage II	G3	0	1072			TUMOR FREE		69	Fundus/Body	Not Available	Not Available	Not Available	Not Available	TCGA-BR-7704	9ef7582b-d4c1-4036-a1ed-ef65aa46fc60	Tver	Russia	18	-25300	Not Applicable	0	38
TCGA-BR-6709	FEMALE	370	Stomach, Adenocarcinoma, Not Otherwise Specified (NOS)	Stomach	Dead	T3	N3a	M0	Stage IIIB	G3	1				WITH TUMOR		57	Cardia/Proximal	Not Available	Not Available	Not Available	Not Available	TCGA-BR-6709	6f70e9f0-580b-4199-934b-dacd29fb28a0	Kiev	Ukraine	23	-20935	Not Applicable	0	38	TCGA-BR-6709-D31221;TCGA-BR-6709-D31222;TCGA-BR-6709-D31224;TCGA-BR-6709-D40140	4864A635-4F6F-4C10-9485-704AC74F5A4B;F0C88A74-DF3A-4D22-AEDF-7F0E70E0680F;6C068635-DBC3-4E67-9F40-AC44B0357F25;E3F514A5-EE64-4E72-8A52-85A3A43E8AA0	Not Available;Not Available;Not Available;Not Available	25;25;25;13	206;206;206;206	61;61;61;61	5-Fluorouracil;Leucovorin;Cisplatin;Carboplatin	Partial Response;Partial Response;Partial Response;Partial Response	4;4;4;2	Not Available;Not Available;Not Available;Not Available	Not Available;Not Available;Not Available;Not Available	Not Available;Not Available;Not Available;Not Available	Not Available;Not Available;Not Available;Not Available	Not Applicable;Not Applicable;Not Applicable;Not Applicable	Not Available;Not Available;Not Available;Not Available	Not Available;Not Available;Not Available;Not Available	NO;NO;NO;NO	Chemotherapy;Ancillary;Chemotherapy;Chemotherapy
TCGA-BR-4369	MALE	0	Stomach, Adenocarcinoma, Not Otherwise Specified (NOS)	Stomach	Alive	TX	NX	M0		G3	0	0			Not Available		75	Cardia/Proximal	Not Available	NO	Not Available	Not Available	TCGA-BR-4369	fe9a5fcf-ff99-4dd1-8cc7-ed9f4b9d952b	Kazan	Russia	6	-27509	Not Applicable	0	0
TCGA-VQ-A8P5	MALE	235	Stomach, Intestinal Adenocarcinoma, Not Otherwise Specified (NOS)	Stomach	Dead	T3	N0	M0	Stage IIA	G3	0	235			Unknown		67	Fundus/Body	Not Available	NO	Not Available	No	TCGA-VQ-A8P5	1654C42B-664B-407E-8CA7-D4CD908B709A	Barretos	Sao Paulo	26	-24571	235	0	Not Available	TCGA-VQ-A8P5-D64338	514FB4F7-8748-45DD-892A-5384FB216EBC	Not Available	28	213	115	Fluorouracil	Unknown	8	Not Available	Not Available	Not Available	Not Available	Not Applicable	Not Available	Not Available	NO	Chemotherapy
TCGA-D7-A4Z0	FEMALE	449	Stomach, Intestinal Adenocarcinoma, Mucinous Type	Stomach	Alive	T2	N2	M0	Stage IIB	G3	0	449			TUMOR FREE		60	Antrum/Distal	Not Available	NO	Not Available	No	TCGA-D7-A4Z0	DCE21359-004F-4E8B-89E4-9E1A30FAFFDF	Poznan	Not Available	1	-22129	Not Applicable	0	148	TCGA-D7-A4Z0-D39754	DF769626-0FDC-4069-B1E6-32078AE6366B	Not Available	1	Not Available	72	5-fluorouracilum	Not Applicable	2	Not Available	Not Available	Not Available	Not Available	Not Applicable	Not Available	Not Available	YES	Chemotherapy
TCGA-BR-6455	MALE	422	Stomach, Adenocarcinoma, Not Otherwise Specified (NOS)	Stomach	Dead	T3	N1	M0	Stage IIB	G3	1	385	Liver	Distant Metastasis	TUMOR FREE		59	Fundus/Body	Not Available	Not Available	Not Available	Not Available	TCGA-BR-6455	75a29059-4705-4a55-bc3d-f5923b24b358	Tver	Russia	19	-21865	Not Applicable	0	43	TCGA-BR-6455-D29820;TCGA-BR-6455-D29821;TCGA-BR-6455-D29822	17B02BF2-584F-439C-9C5C-86CE0B01449E;D67276A0-F271-4D63-BA0F-EED534691DB5;382E9A61-0E25-4BF8-82DD-860295903BCE	Not Available;Not Available;Not Available	29;29;29	131;131;131	44;44;44	Etoposide phosphate;5-Fluorouracil;Leucovorin	Not Available;Not Available;Not Available	3;3;3	3;3;3	200;750;100	mg/day;mg/day;mg/day	ADJUVANT;ADJUVANT;ADJUVANT	Not Applicable;Not Applicable;Not Applicable	Not Available;Not Available;Not Available	IV;IV;IV	NO;NO;NO	Chemotherapy;Chemotherapy;Other, specify in notes
TCGA-EQ-8122	FEMALE	243	Stomach, Intestinal Adenocarcinoma, Not Otherwise Specified (NOS)	Stomach	Dead	T3	N1	MX	Stage IIB	G3	0	243			Not Available		71	Antrum/Distal	Not Available	Not Available	Not Available	Not Available	TCGA-EQ-8122	4e921bc8-df5d-4f54-93d1-d5a433f91bdb	Not Available	United States	13	-26289	Not Applicable	0	237	TCGA-EQ-8122-D32951;TCGA-EQ-8122-D32954	9E669396-FE81-4E4B-A481-2654384F83DA;4D38CD6C-6B2E-477A-B670-69BE7E48425E	Not Available;Not Available	18;18	157;157	68;68	5FU;Leucovorin	Unknown;Unknown	6;6	Not Available;Not Available	Not Available;Not Available	Not Available;Not Available	Not Available;Not Available	Not Applicable;Not Applicable	Not Available;Not Available	Not Available;Not Available	NO;NO	Chemotherapy;Ancillary
TCGA-VQ-A924	MALE	1686	Stomach, Intestinal Adenocarcinoma, Tubular Type	Stomach	Dead	T3	N0	M0	Stage II	G2	1			Locoregional Recurrence	WITH TUMOR		69	Antrum/Distal	Not Available	NO	Not Available	No	TCGA-VQ-A924	C656375B-6B63-4728-A126-DBD746A1F437	Barretos	Sao Paulo	23	-25351	1686	0	Not Available
TCGA-IN-A6RI	MALE	559	Stomach, Adenocarcinoma, Not Otherwise Specified (NOS)	Stomach	Alive	T1b	N0	M0	Stage I	G2	0	559			TUMOR FREE		45	Gastroesophageal Junction	Not Available	Unknown	Not Available	Yes	TCGA-IN-A6RI	EC178822-D719-4E98-B864-16EC5AA005A4	Pittsburgh	Pennsylvania	10	-16788	Not Applicable	0	559
TCGA-VQ-A94P	MALE	81	Stomach Adenocarcinoma, Signet Ring Type	Stomach	Dead	T4	NX	MX		GX	0	81			WITH TUMOR		57	Fundus/Body	Not Available	NO	Not Available	No	TCGA-VQ-A94P	A205522F-2DF0-4829-B86F-FA43C76C39CC	Barretos	Sao Paulo	20	-21022	81	0	Not Available
TCGA-R5-A7ZF	FEMALE	259	Stomach, Intestinal Adenocarcinoma, Tubular Type	Stomach	Dead	T4a	N1	M1	Stage IV	G2	0	259			WITH TUMOR		65	Antrum/Distal	Not Available	NO	Not Available	No	TCGA-R5-A7ZF	9745F1CA-D663-458A-86DD-024EBBF6A863	Houston	Texas	24	-23908	259	0	Not Available
TCGA-CG-4477	FEMALE	942	Stomach, Intestinal Adenocarcinoma, Not Otherwise Specified (NOS)	Stomach	Alive	T2a	N0	M0	Stage IB	G3	1	365			WITH TUMOR		58	Cardia/Proximal	Not Available	Not Available	Not Available	Not Available	TCGA-CG-4477	18d0aae7-9694-4252-b8fe-16e62dadab07	Hamburg	Germany	22	-21427	Not Applicable	0	31	TCGA-CG-4477-D37579;TCGA-CG-4477-D37580	9B02C9BB-92BA-4E72-8B87-C52D3C233812;8F85533D-2939-417D-B5B0-1AB68FA71A11	Not Available;Not Available	4;4	457;457	426;426	Cisplatin;5-Fluorouracil	Clinical Progressive Disease;Clinical Progressive Disease	12;12	Not Available;Not Available	Not Available;Not Available	Not Available;Not Available	Not Available;Not Available	Not Applicable;Not Applicable	Not Available;Not Available	Not Available;Not Available	NO;NO	Chemotherapy;Chemotherapy
TCGA-IN-7806	MALE	1106	Stomach, Adenocarcinoma, Diffuse Type	Stomach	Alive	T3	N1	M0	Stage IIB	G3	0	1106			TUMOR FREE		50	Gastroesophageal Junction	Not Available	YES	Proton Pump Inhibitors	No	TCGA-IN-7806	87c217d4-66f4-46ca-8244-7856ce658fd3	PITTSBURGH	PA	29	-18404	Not Applicable	0	209	TCGA-IN-7806-D43603;TCGA-IN-7806-D43604;TCGA-IN-7806-D43605	60ADFEE7-A33A-46E9-9FB5-1CED530F19A7;F45B2ED5-5FCE-4530-B895-7D4D6E34A528;935A544F-A6D0-41FB-90C0-8468319FE607	Not Available;Not Available;Not Available	29;29;29	116;116;116	62;62;62	Epirubicin;Oxaliplatin;Xeloda	Complete Response;Complete Response;Complete Response	5;5;5	Not Available;Not Available;Not Available	Not Available;Not Available;Not Available	Not Available;Not Available;Not Available	Not Available;Not Available;Not Available	Not Applicable;Not Applicable;Not Applicable	Not Available;Not Available;Not Available	Not Available;Not Available;Not Available	NO;NO;NO	Chemotherapy;Chemotherapy;Chemotherapy
TCGA-BR-A44T	FEMALE	1038	Stomach, Adenocarcinoma, Diffuse Type	Stomach	Alive	T3	N0	M0	Stage IIA	G3	1	682		Locoregional Recurrence	TUMOR FREE		53	Cardia/Proximal	Not Available	Not Available	Not Available	No	TCGA-BR-A44T	98BF4652-0088-4ECC-9DFA-376438CB063C	Kiev	Ukraine	6	-19407	Not Applicable	0	13	TCGA-BR-A44T-D46406;TCGA-BR-A44T-D46407;TCGA-BR-A44T-D60631;TCGA-BR-A44T-D60632;TCGA-BR-A44T-D60633	C1431FDD-005A-465F-8795-AA4F2ACFDABD;6DD0DFAA-BDF7-49DE-B36D-97C3DE91998A;54B88AB0-93C0-4219-BCAC-E560497ACF94;1764350C-63FD-4DFD-B592-6465C29A1419;CFD30708-A79C-41AA-9A12-82E2FEF8411B	Not Available;Not Available;Not Available;Not Available;Not Available	7;7;13;13;13	196;196;714;714;714	47;47;682;682;682	5-Fluorouracil;Leucovorin;5-Fluorouracil;Leucovorin;Etoposide	Complete Response;Complete Response;Stable Disease;Stable Disease;Stable Disease	8;8;6;6;6	Not Available;Not Available;Not Available;Not Available;Not Available	Not Available;Not Available;Not Available;Not Available;Not Available	Not Available;Not Available;Not Available;Not Available;Not Available	Not Available;Not Available;Not Available;Not Available;Not Available	Not Applicable;Not Applicable;Not Applicable;Not Applicable;Not Applicable	Not Available;Not Available;Not Available;Not Available;Not Available	Not Available;Not Available;Not Available;Not Available;Not Available	NO;NO;NO;NO;NO	Chemotherapy;Ancillary;Chemotherapy;Ancillary;Chemotherapy
TCGA-KB-A93G	MALE	613	Stomach Adenocarcinoma, Signet Ring Type	Stomach	Alive	T2	N0	M0	Stage IB	G1	0	613			TUMOR FREE		68	Gastroesophageal Junction	Not Available	YES	Antacids	No	TCGA-KB-A93G	E52396D1-ACD6-44F4-99C5-1A367128008D	Toronto	Ontario	20	-24924	Not Applicable	0	432
TCGA-BR-A4PF	MALE	35	Stomach, Adenocarcinoma, Not Otherwise Specified (NOS)	Stomach	Alive	T4a	N2	M0	Stage IIIB	G3	0	35			TUMOR FREE		72	Antrum/Distal	Not Available	Unknown	Not Available	Unknown	TCGA-BR-A4PF	0F6B5086-4BC0-4CE3-84E7-EF8EA0356D1C	Tver	Russia	21	-26412	Not Applicable	0	22
TCGA-R5-A7O7	MALE	1389	Stomach, Intestinal Adenocarcinoma, Tubular Type	Stomach	Alive	T3	N1	M1	Stage IV	G2	0	1389			TUMOR FREE		51	Gastroesophageal Junction	Not Available	YES	Proton Pump Inhibitors	No	TCGA-R5-A7O7	3BFA8069-6CA3-4405-9E32-11AA16B010AC	Houston	Texas	24	-18984	Not Applicable	0	1389
TCGA-VQ-A8PM	MALE	57	Stomach Adenocarcinoma, Signet Ring Type	Stomach	Dead	T4	N3	M0	Stage IV	G3	0	57			WITH TUMOR		56	Cardia/Proximal	Not Available	NO	Not Available	No	TCGA-VQ-A8PM	BAB53C56-82F1-4D63-98F5-4608EA7B5F4E	Barretos	Sao Paulo	30	-20665	57	0	Not Available
TCGA-BR-7722	MALE	466	Stomach, Adenocarcinoma, Not Otherwise Specified (NOS)	Stomach	Dead	T3	N1	M0	Stage IIB	G3	0	466			TUMOR FREE		62	Gastroesophageal Junction	Not Available	Not Available	Not Available	Not Available	TCGA-BR-7722	8d3e3d09-bc61-4d5e-b8d6-5aee6cb488ae	Kiev	Ukraine	25	-22701	Not Applicable	0	5
TCGA-CG-4306	MALE	1	Stomach, Adenocarcinoma, Not Otherwise Specified (NOS)	Stomach	Dead	T3	N2	M1	Stage IV	G3	0	1			Not Available		90	Antrum/Distal	Not Available	Not Available	Not Available	Not Available	TCGA-CG-4306	73d177f7-8c0a-42f6-a73d-8073c0e6142b	Hamburg	Germany	22	-32871	1	0	Not Available
TCGA-D7-A4YU	MALE	500	Stomach, Intestinal Adenocarcinoma, Tubular Type	Stomach	Alive	T3	N3a	M0	Stage IIIB	G3	1				TUMOR FREE		73	Fundus/Body	Not Available	NO	Not Available	No	TCGA-D7-A4YU	32B44138-64E2-4BBF-AA2F-93A3B07EC670	Poznan	Not Available	24	-26781	Not Applicable	0	210	TCGA-D7-A4YU-D39493;TCGA-D7-A4YU-D51364	752A76A3-A84A-45F3-9F63-F0250162D9E4;67F00099-548F-4B1F-A3DD-076ECFB4DA78	Not Available;Not Available	24;18	Not Available;Not Available	213;518	Capecitabine;FLC	Not Applicable;Not Applicable	1;11	Not Available;Not Available	Not Available;Not Available	Not Available;Not Available	Not Available;Not Available	Not Applicable;Not Applicable	Not Available;Not Available	Not Available;Not Available	YES;YES	Chemotherapy;Chemotherapy
TCGA-F1-6874	MALE	440	Stomach, Intestinal Adenocarcinoma, Not Otherwise Specified (NOS)	Stomach	Alive	T2	N0	M0	Stage IB	G3	0	440			TUMOR FREE		79	Cardia/Proximal	Not Available	NO	Not Available	No	TCGA-F1-6874	106f3344-f699-4b2c-8f62-4ac6c948dde4	Chapel Hill	North Carolina	4	-29083	Not Applicable	0	62
TCGA-CD-8532	MALE	354	Stomach, Adenocarcinoma, Not Otherwise Specified (NOS)	Stomach	Dead	T3	N0	M0	Stage II	G2	1	282		Locoregional Recurrence	TUMOR FREE		52	Cardia/Proximal	Not Available	Not Available	Not Available	Not Available	TCGA-CD-8532	8e0f35e8-cd02-4d8b-9145-597cc65eac13	Not Available	Not Available	15	-19284	Not Applicable	0	3
TCGA-BR-A4IZ	FEMALE	273	Stomach, Adenocarcinoma, Diffuse Type	Stomach	Dead	T4a	N2	M0	Stage IIIB	G3	0	273			TUMOR FREE		45	Antrum/Distal	Not Available	NO	Not Available	No	TCGA-BR-A4IZ	CADC555E-E350-40CF-8674-3536942F3E02	Hanoi	Vietnam	8	-16695	Not Applicable	0	24
TCGA-CG-4301	FEMALE	92	Stomach, Adenocarcinoma, Not Otherwise Specified (NOS)	Stomach	Alive	T4	N1	M1	Stage IV	G3	0	92			WITH TUMOR		75	Cardia/Proximal	Not Available	Not Available	Not Available	Not Available	TCGA-CG-4301	7e13fe2a-3d6e-487f-900d-f5891d986aa2	Hamburg	Germany	22	-27516	Not Applicable	0	92
TCGA-HU-A4GY	FEMALE	8	Stomach, Adenocarcinoma, Diffuse Type	Stomach	Alive	T4	N1	M0	Stage IIIA	G3	0	8			TUMOR FREE		76	Antrum/Distal	Not Available	Unknown	Not Available	Yes	TCGA-HU-A4GY	41327AAC-1228-435A-8DE5-B26886BDBCE0	Daegu	Not Available	11	-28113	Not Applicable	0	8
TCGA-D7-5578	MALE	385	Stomach, Intestinal Adenocarcinoma, Tubular Type	Stomach	Alive	T3	N2	M0	Stage IIIA	G3	0	385			TUMOR FREE		80	Fundus/Body	Not Available	Not Available	Not Available	No	TCGA-D7-5578	a3c1f9a2-9174-48cf-81dc-2afcfdc4ba9c	Poznan	Poland	6	-29390	Not Applicable	0	109
TCGA-CD-8529	MALE	374	Stomach, Intestinal Adenocarcinoma, Mucinous Type	Stomach	Alive	T4	N0	M1	Stage IV	G2	0	374			TUMOR FREE		65	Antrum/Distal	Not Available	Not Available	Not Available	Not Available	TCGA-CD-8529	5b7e557a-6aee-4077-b3cd-c96179e643ae	Not Available	Not Available	15	-23979	Not Applicable	0	4	TCGA-CD-8529-D70966;TCGA-CD-8529-D70967;TCGA-CD-8529-D70968	EF88DBFE-A5E1-452A-BB65-E714F54718C2;6FEA86DF-2F54-4214-87B5-744CDB6A0AD5;4A2225B5-1A24-4928-A360-B76086B98ACA	Not Available;Not Available;Not Available	11;11;11	148;148;148	50;50;50	Epirubicin;Cisplatin;Capecitabine	Complete Response;Complete Response;Complete Response	3;3;3	Not Available;Not Available;Not Available	Not Available;Not Available;Not Available	Not Available;Not Available;Not Available	Not Available;Not Available;Not Available	Not Applicable;Not Applicable;Not Applicable	Not Available;Not Available;Not Available	Not Available;Not Available;Not Available	NO;NO;NO	Chemotherapy;Chemotherapy;Chemotherapy
TCGA-CD-A4MJ	MALE	384	Stomach, Adenocarcinoma, Not Otherwise Specified (NOS)	Stomach	Alive	T2	N0	M0	Stage IB	G2	1	69		Locoregional Recurrence	TUMOR FREE		60	Fundus/Body	Not Available	Not Available	Not Available	Not Available	TCGA-CD-A4MJ	287059FB-4E69-4D6D-99D5-91EC92D35BDE	Not Available	Not Available	13	-21932	Not Applicable	0	3	TCGA-CD-A4MJ-D69724;TCGA-CD-A4MJ-D69727;TCGA-CD-A4MJ-D70218	90FA6E72-6EFD-4E99-B8BF-E8EBD4B07A3B;7AEEAF05-90E0-4978-ABB5-996550C4C75E;3D234948-2889-4BC9-A60E-FF7144CA9B31	Not Available;Not Available;Not Available	16;30;30	186;186;186	86;86;86	Cisplatin;5-Flourouracil;Epirubicin	Complete Response;Complete Response;Complete Response	1;1;1	Not Available;Not Available;Not Available	Not Available;Not Available;Not Available	Not Available;Not Available;Not Available	Not Available;Not Available;Not Available	Not Applicable;Not Applicable;Not Applicable	Not Available;Not Available;Not Available	Not Available;Not Available;Not Available	NO;NO;NO	Chemotherapy;Chemotherapy;Chemotherapy
TCGA-D7-8578	MALE	643	Stomach, Adenocarcinoma, Not Otherwise Specified (NOS)	Stomach	Alive	T2	N0	M0	Stage IB	G2	1	451	Lung	Locoregional Recurrence	TUMOR FREE		72	Antrum/Distal	Not Available	NO	Not Available	No	TCGA-D7-8578	50279b37-828d-4e18-b41f-f793c3923e75	Poznan	Poland	24	-26620	Not Applicable	0	160
TCGA-CD-8531	FEMALE	383	Stomach, Adenocarcinoma, Diffuse Type	Stomach	Alive	T3	N1	M0	Stage IIIA	G3	0	383			TUMOR FREE		66	Fundus/Body	Not Available	Not Available	Not Available	Not Available	TCGA-CD-8531	efe8b105-b170-4679-8b97-c1142fefe069	Not Available	Not Available	15	-24453	Not Applicable	0	3	TCGA-CD-8531-D70963;TCGA-CD-8531-D70998;TCGA-CD-8531-D70999	65A270A1-296A-427E-8B4F-73FEA1AAC0E5;E8A3276E-BA68-4AC1-8667-017C71CEE93B;8A235D07-A810-4162-B7CE-C45E5DC95658	Not Available;Not Available;Not Available	12;12;12	197;197;197	106;106;106	Epirubicin;Cisplatin;5-Flourouracil	Complete Response;Complete Response;Complete Response	3;3;3	Not Available;Not Available;Not Available	Not Available;Not Available;Not Available	Not Available;Not Available;Not Available	Not Available;Not Available;Not Available	Not Applicable;Not Applicable;Not Applicable	Not Available;Not Available;Not Available	Not Available;Not Available;Not Available	NO;NO;NO	Chemotherapy;Chemotherapy;Chemotherapy
TCGA-B7-A5TJ	MALE	335	Stomach, Intestinal Adenocarcinoma, Not Otherwise Specified (NOS)	Stomach	Alive	T4a	NX	M0	Stage IIB	G1	0	335			TUMOR FREE		74	Fundus/Body	Not Available	YES	H2 Blockers;Antacids	Not Available	TCGA-B7-A5TJ	5624BEAB-545A-4A5B-960E-C33429572272	Saint Petersburg	Russia	13	-27057	Not Applicable	0	25
TCGA-RD-A8N5	MALE	1747	Stomach, Intestinal Adenocarcinoma, Mucinous Type	Stomach	Dead	T3	N1	M0	Stage IIIA	G2	0	1747			TUMOR FREE		78	Fundus/Body	Not Available	YES	Proton Pump Inhibitors	No	TCGA-RD-A8N5	6E2ECC9D-DC68-4922-A36E-E8BBAF9EAFB3	Melbourne	Victoria	28	-28589	1747	0	Not Available	TCGA-RD-A8N5-D57482	6C0882D6-B18C-4933-A69B-6F7A32CB8237	Not Available	11	209	82	5-FU	Unknown	3	Not Available	Not Available	Not Available	Not Available	Not Applicable	Not Available	Not Available	NO	Chemotherapy
TCGA-BR-6452	FEMALE	1055	Stomach, Adenocarcinoma, Not Otherwise Specified (NOS)	Stomach	Alive	T3	N0	M0	Stage IIA	G3	0	1055			TUMOR FREE		78	Fundus/Body	Not Available	Not Available	Not Available	Not Available	TCGA-BR-6452	27988b3e-cde1-4f4b-82a1-6d8ad08db8e9	Tver	Russia	19	-28827	Not Applicable	0	29
TCGA-BR-7716	FEMALE	1210	Stomach, Adenocarcinoma, Not Otherwise Specified (NOS)	Stomach	Alive	T3	N1	M0	Stage IIB	G2	0	1210			TUMOR FREE		62	Fundus/Body	Not Available	Not Available	Not Available	Not Available	TCGA-BR-7716	ca21c55f-45a7-42af-be07-430990d5445b	Tver	Not Available	2	-22829	Not Applicable	0	25
TCGA-CD-5798	MALE	408	Stomach, Intestinal Adenocarcinoma, Mucinous Type	Stomach	Alive	T3	N0	M0	Stage II	G2	0	408			TUMOR FREE		82	Antrum/Distal	Not Available	Not Available	Not Available	Not Available	TCGA-CD-5798	e42f45c6-fd00-44cf-a210-c8803da326a1	Not Available	Vietnam	8	-30310	Not Applicable	0	25
TCGA-IN-A6RN	FEMALE	594	Stomach, Adenocarcinoma, Not Otherwise Specified (NOS)	Stomach	Alive	T1b	N2	M0	Stage IIA	G2	0	594			TUMOR FREE		72	Gastroesophageal Junction	Not Available	Unknown	Not Available	Yes	TCGA-IN-A6RN	D2E49FE3-FC7C-47C5-AA1F-B6B06D10951A	Confluence	Pensylvania	10	-26409	Not Applicable	0	398
TCGA-BR-A4CR	FEMALE	0	Stomach, Adenocarcinoma, Not Otherwise Specified (NOS)	Stomach	Alive	T4b	N3a	M0	Stage IIIC	G3	0	0			TUMOR FREE		70	Fundus/Body	Not Available	Not Available	Not Available	Unknown	TCGA-BR-A4CR	794FBAD5-93CE-4F9A-AEE4-37A89A6719EC	Tver	Not Available	6	-25669	Not Applicable	0	0
TCGA-EQ-5647	FEMALE	19	Stomach, Adenocarcinoma, Not Otherwise Specified (NOS)	Stomach	Dead	T4	N3	M1	Stage IV	G2	1				WITH TUMOR		86	Antrum/Distal	Not Available	YES	Proton Pump Inhibitors	No	TCGA-EQ-5647	2d291fa3-f0fd-4bc1-91a6-783863714190	Newark	Delaware/ USA	6	-31431	19	0	Not Available
TCGA-IN-A7NU	MALE	356	Stomach, Adenocarcinoma, Not Otherwise Specified (NOS)	Stomach	Alive	T3	N3	M0	Stage IIIB	G3	1	337		Distant Metastasis	Unknown		69	Gastroesophageal Junction	Not Available	Unknown	Not Available	Unknown	TCGA-IN-A7NU	26A5E389-8EC2-4316-BEEA-F9A63D455B73	Cabot	Pennsylvania	11	-25515	Not Applicable	0	55	TCGA-IN-A7NU-D69490;TCGA-IN-A7NU-D69491	73E895E5-F6C4-487C-BF05-61F3FFB8DB30;66407BB0-63A0-4D47-B62F-D1C05D098F9E	Not Available;Not Available	9;9	169;169	105;105	Taxol;Carboplatin	Clinical Progressive Disease;Clinical Progressive Disease	1;1	Not Available;Not Available	Not Available;Not Available	Not Available;Not Available	Not Available;Not Available	Not Applicable;Not Applicable	Not Available;Not Available	Not Available;Not Available	NO;NO	Chemotherapy;Chemotherapy
TCGA-HU-A4GQ	MALE	3	Stomach, Intestinal Adenocarcinoma, Tubular Type	Stomach	Dead	T4b	N2	M0	Stage IIIC	G2	0	3			TUMOR FREE		71	Antrum/Distal	Not Available	Not Available	Not Available	Yes	TCGA-HU-A4GQ	7739F659-0E25-4404-AD25-EE52FBBCFD44	Daegu	Not Available	11	-26200	3	0	Not Available
TCGA-BR-8295	FEMALE	67	Stomach, Adenocarcinoma, Not Otherwise Specified (NOS)	Stomach	Dead	T4a	N0	M0	Stage IIB	G3	1				WITH TUMOR		60	Fundus/Body	Not Available	Unknown	Not Available	Unknown	TCGA-BR-8295	62d32d19-ec93-4359-ab17-dc32e599b29a	Tver	Russia	7	-22256	Not Applicable	0	47
TCGA-HU-8243	MALE	180	Stomach, Intestinal Adenocarcinoma, Tubular Type	Stomach	Dead	T4a	N3b	M0	Stage IIIC	G2	1	132	Liver	Distant Metastasis	WITH TUMOR		66	Fundus/Body	Not Available	Unknown	Not Available	No	TCGA-HU-8243	77a8eab6-f6a1-4739-9031-75ead40d68cb	Pusan	Not Available	14	-24187	180	0	Not Available	TCGA-HU-8243-D42415	E3FC6226-824F-41AE-9FD2-B8468E8FF6BC	Not Available	26	157	36	5-FU	Complete Response	4	Not Available	Not Available	Not Available	Not Available	Not Applicable	Not Available	Not Available	NO	Chemotherapy
TCGA-BR-A44U	MALE	422	Stomach, Adenocarcinoma, Not Otherwise Specified (NOS)	Stomach	Dead	T3	N3a	M0	Stage IIIB	G3	0	422			TUMOR FREE		70	Antrum/Distal	Not Available	NO	Not Available	No	TCGA-BR-A44U	7840D10B-4927-4731-8DDA-5F288DA21BEF	Kiev	Ukraine	6	-25577	Not Applicable	0	35
[truncated: 120 more columns]
