# Supplementary figures and images for: DNMT family induces down-regulation of NDRG1 via DNA methylation and clinicopathological significance in gastric cancer
Source: PeerJ journal article supplement (doi:10.7717/peerj.12146), 2021-09-16

Type  normal  tumor

$p=0.00021$

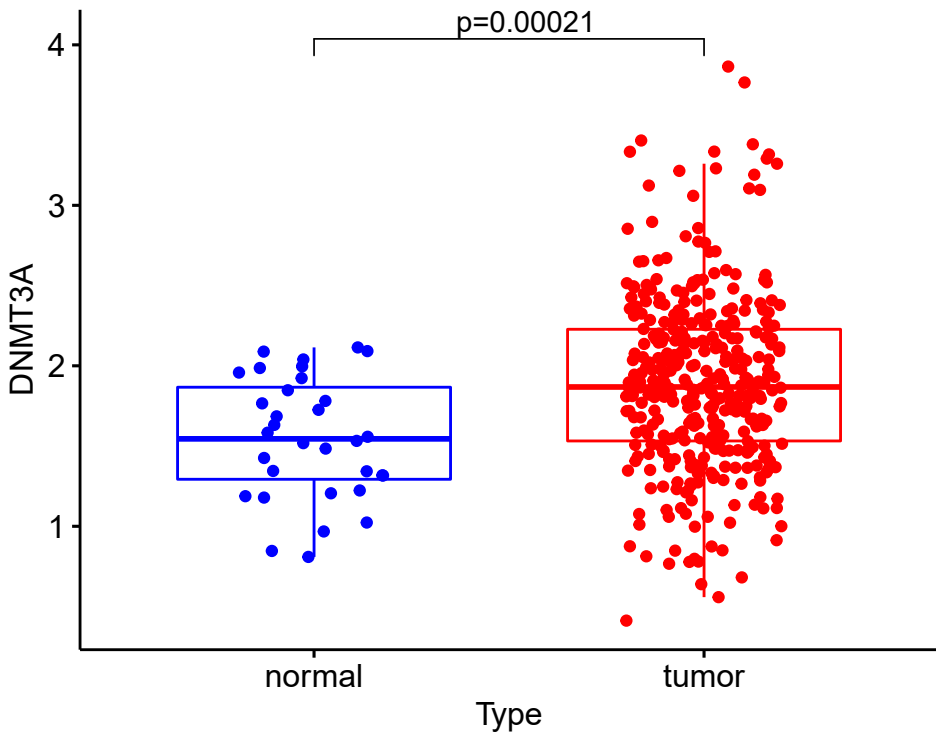

Supplement: Raw_data.zip [file DMNT3A-mRNA level.pdf › Raw data/DMNT3A-mRNA level.pdf]

Type  normal  tumor

$p < 2.22\text{e-}16$

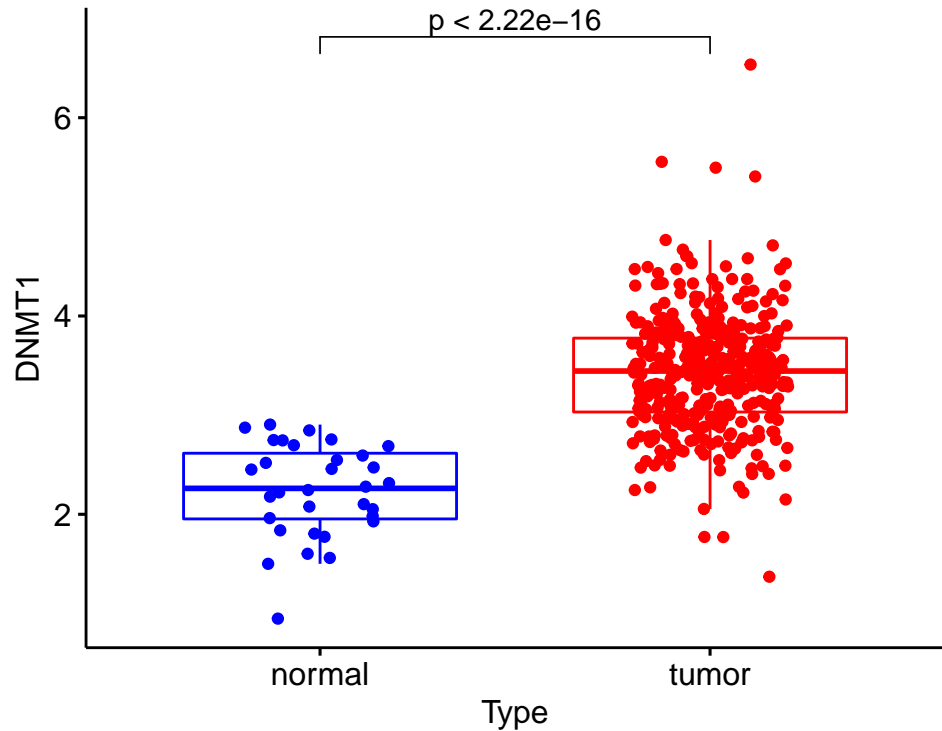

Supplement: Raw_data.zip [file DNMT1--mRNA level.pdf › Raw data/DNMT1--mRNA level.pdf]

Type  normal  tumor

$p < 2.22\text{e-}16$

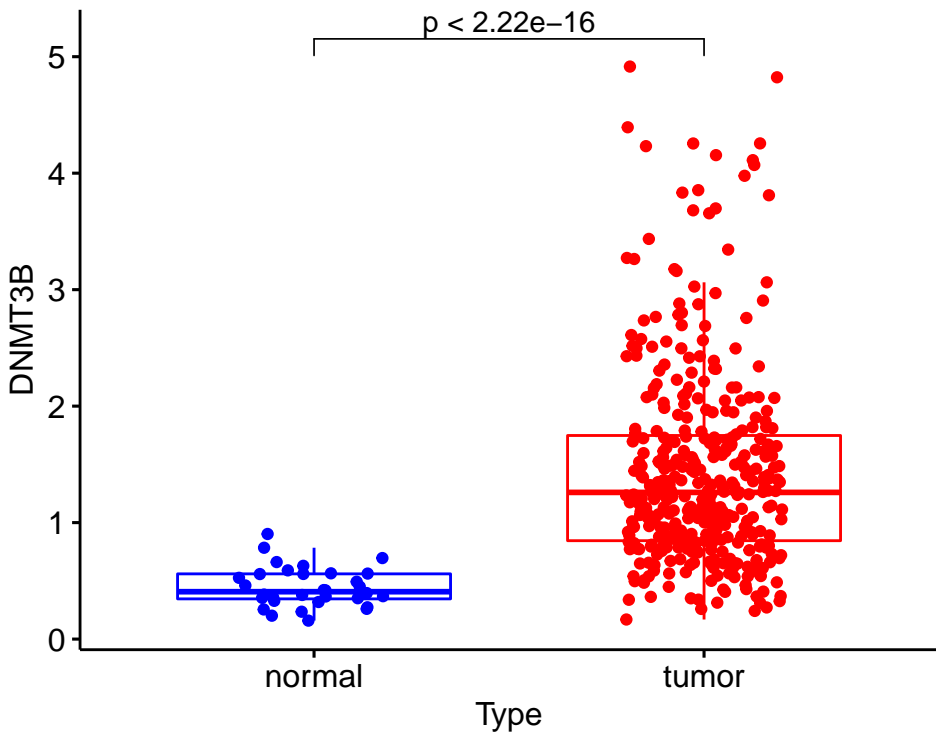

Supplement: Raw_data.zip [file DNMT3B-mRNA level.pdf › Raw data/DNMT3B-mRNA level.pdf]

# DNRG1-M-DNMT1

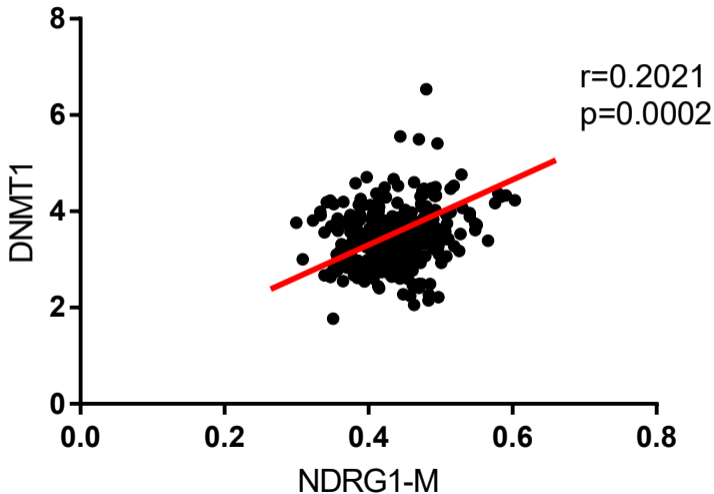

Supplement: Raw_data.zip [file DNRG1-M-DNMT1 (1).pdf › Raw data/DNRG1-M-DNMT1 (1).pdf]

# DNRG1-M-DNMT3A

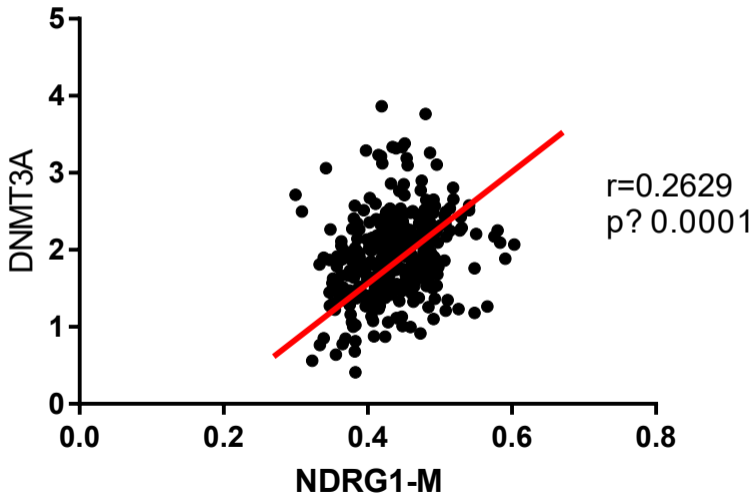

Supplement: Raw_data.zip [file DNRG1-M-DNMT3A.pdf › Raw data/DNRG1-M-DNMT3A.pdf]

# DNRG1-M-DNMT3B

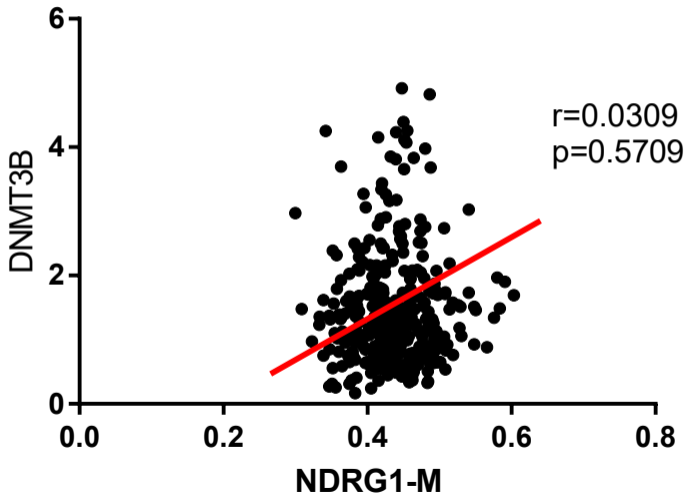

Supplement: Raw_data.zip [file DNRG1-M-DNMT3B.pdf › Raw data/DNRG1-M-DNMT3B.pdf]

# NDRG1-DNMT1

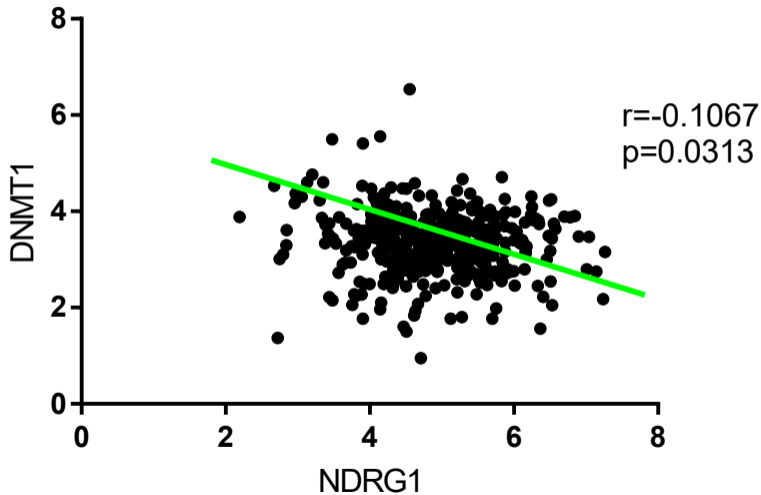

Supplement: Raw_data.zip [file NDRG1-DNMT1.pdf › Raw data/NDRG1-DNMT1.pdf]

# NDRG1-DNMT3A

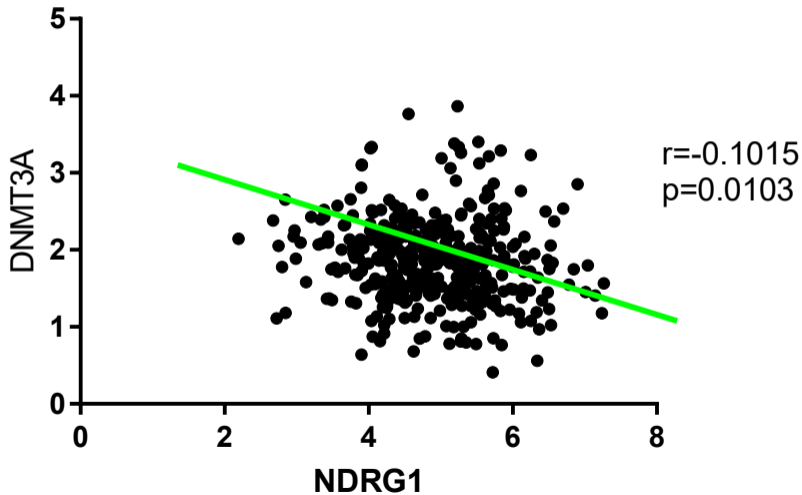

Supplement: Raw_data.zip [file NDRG1-DNMT3A.pdf › Raw data/NDRG1-DNMT3A.pdf]

# NDRG1-DNMT3B

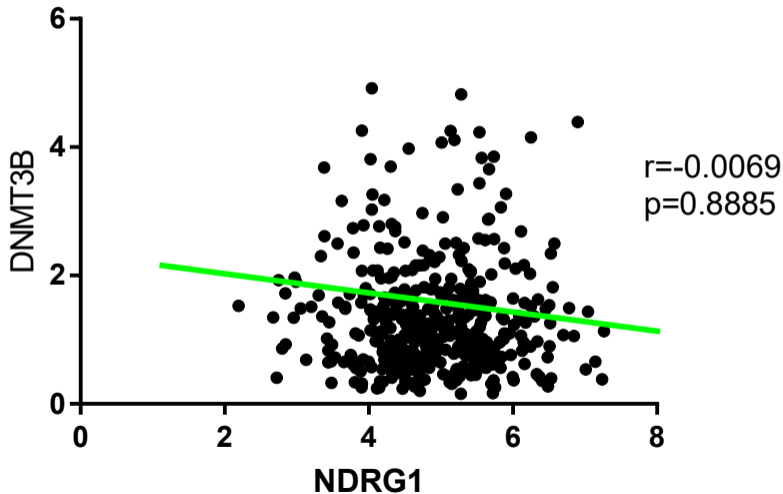

Supplement: Raw_data.zip [file NDRG1-DNMT3B.pdf › Raw data/NDRG1-DNMT3B.pdf]

Type  normal  tumor

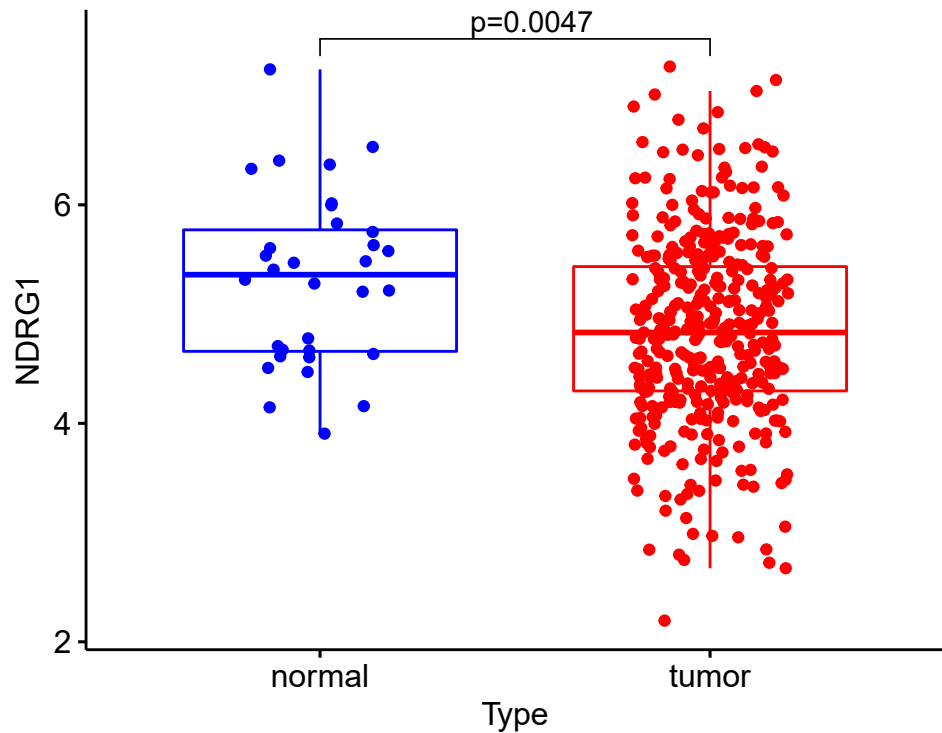

Supplement: Raw_data.zip [file NDRG1-mRNA level.pdf › Raw data/NDRG1-mRNA level.pdf]
